# Supplementary material for: Altered phenotype and gene expression of regulatory T cells (Tregs) in children with Autism, and the relationship with comorbid gastrointestinal symptoms
Source: J Neuroinflammation. 2026 Feb 17;23:97. doi: 10.1186/s12974-026-03701-w (PMC13014816; doi:10.1186/s12974-026-03701-w)
Supplement: Supplementary file 1 — Supplementary Material 1. [file 12974_2026_3701_MOESM1_ESM.xlsx]

## Sheet: Without GI Comparisions
Feature ID	Gene name	P-value (No,ASD vs No,TD)	FDR step up (No,ASD vs No,TD)	Ratio (No,ASD vs No,TD)	Fold change (No,ASD vs No,TD)	LSMean(No,ASD) (No,ASD vs No,TD)	LSMean(No,TD) (No,ASD vs No,TD)	P-value (Yes,ASD vs Yes,TD)	FDR step up (Yes,ASD vs Yes,TD)	Ratio (Yes,ASD vs Yes,TD)	Fold change (Yes,ASD vs Yes,TD)	LSMean(Yes,ASD) (Yes,ASD vs Yes,TD)	LSMean(Yes,TD) (Yes,ASD vs Yes,TD)	P-value (ASD vs TD)	FDR step up (ASD vs TD)	Ratio (ASD vs TD)	Fold change (ASD vs TD)	LSMean(ASD) (ASD vs TD)	LSMean(TD) (ASD vs TD)
ENSG00000198888	MT-ND1	1.57034e-06	0.00605614	0.329638	-3.03363	3498.33	10612.6	0.172608	0.703235	0.613685	-1.6295	3498.33	5700.54	7.26753e-07	0.000569921	0.304668	-3.28227	3498.33	11482.5
ENSG00000007255	TRAPPC6A	2.07012e-06	0.00605614	0.50926	-1.96363	86.7495	170.344	0.000183258	0.0698561	0.443816	-2.25319	86.7495	195.463	2.89366e-08	5.6436e-05	0.443709	-2.25373	86.7495	195.51
ENSG00000171204	TMEM126B	9.78387e-05	0.171128	2.07329	2.07329	51.998	25.08	0.649096	0.914046	0.883181	-1.13227	51.998	58.8758	0.00175119	0.0400514	1.84654	1.84654	51.998	28.1597
ENSG00000198727	MT-CYB	0.000116991	0.171128	0.384313	-2.60205	5938.38	15452	0.500281	0.859163	0.771655	-1.29592	5938.38	7695.64	0.000168535	0.0111299	0.379273	-2.63663	5938.38	15657.3
ENSG00000159348	CYB5R1	0.000232653	0.27225	0.349267	-2.86314	30.2116	86.4999	0.0374727	0.427828	0.400487	-2.49696	30.2116	75.4371	0.00200762	0.043186	0.399937	-2.50039	30.2116	75.5409
ENSG00000061273	HDAC7	0.000398234	0.388344	0.439376	-2.27595	341.425	777.067	0.533596	0.87554	0.799235	-1.2512	341.425	427.189	0.00777006	0.0967289	0.526358	-1.89985	341.425	648.655
ENSG00000198899	MT-ATP6	0.000595203	0.497505	0.436893	-2.28889	12534.4	28689.8	0.917613	0.979902	0.962092	-1.0394	12534.4	13028.3	0.00279499	0.0537944	0.473119	-2.11364	12534.4	26493.2
ENSG00000176978	DPP7	0.000823702	0.547168	0.536983	-1.86226	84.6932	157.72	0.433764	0.833814	0.797911	-1.25327	84.6932	106.144	0.000417745	0.0182058	0.507408	-1.9708	84.6932	166.914
ENSG00000104529	EEF1D	0.000907505	0.547168	0.545411	-1.83348	568.232	1041.84	0.00516801	0.201726	0.453672	-2.20424	568.232	1252.52	0.000109794	0.00880004	0.480378	-2.08169	568.232	1182.88
ENSG00000214113	LYRM4	0.000990253	0.547168	0.404155	-2.4743	13.1513	32.5403	0.0050336	0.200351	0.312698	-3.19798	13.1513	42.0576	0.256363	0.585472	0.703408	-1.42165	13.1513	18.6966
ENSG00000198763	MT-ND2	0.00106163	0.547168	0.446344	-2.24042	7429.93	16646.2	0.884742	0.968284	0.946165	-1.0569	7429.93	7852.68	0.00343971	0.0596521	0.473143	-2.11352	7429.93	15703.3
ENSG00000156273	BACH1	0.0011222	0.547168	1.98104	1.98104	48.4101	24.4367	0.092065	0.609261	1.71859	1.71859	48.4101	28.1686	4.75976e-05	0.0049731	2.51611	2.51611	48.4101	19.2401
ENSG00000130813	SHFL	0.00122722	0.552344	0.54748	-1.82655	48.1786	88.0005	0.755782	0.941041	0.913414	-1.09479	48.1786	52.7456	0.166972	0.482586	0.763551	-1.30967	48.1786	63.098
ENSG00000101752	MIB1	0.00158284	0.636867	1.59846	1.59846	220.762	138.109	0.0372613	0.427828	1.61356	1.61356	220.762	136.816	2.37821e-05	0.00296062	1.92685	1.92685	220.762	114.571
ENSG00000137970	RPL7P9	0.00163271	0.636867	0.553965	-1.80517	895.918	1617.28	0.00395909	0.181827	0.433357	-2.30757	895.918	2067.39	0.00520343	0.0756783	0.580464	-1.72276	895.918	1543.45
ENSG00000103275	UBE2I	0.00183586	0.651384	0.509127	-1.96414	207.579	407.715	0.245076	0.748171	0.677081	-1.47693	207.579	306.579	0.00352523	0.0601345	0.519028	-1.92668	207.579	399.938
ENSG00000005812	FBXL3	0.00189259	0.651384	1.61113	1.61113	125.836	78.104	0.011928	0.264358	1.82289	1.82289	125.836	69.0309	3.11556e-06	0.00111785	2.13433	2.13433	125.836	58.9581
ENSG00000141699	RETREG3	0.00206814	0.661068	0.545607	-1.83282	137.941	252.82	0.109977	0.636173	0.615205	-1.62547	137.941	224.219	1.12149e-05	0.00205058	0.409202	-2.44378	137.941	337.097
ENSG00000155380	SLC16A1	0.00216408	0.661068	1.90643	1.90643	57.1268	29.9653	0.645177	0.914046	1.15714	1.15714	57.1268	49.369	0.017809	0.154058	1.66994	1.66994	57.1268	34.209
ENSG00000043093	DCUN1D1	0.00235515	0.661068	1.74997	1.74997	91.4301	52.2468	0.215873	0.733853	1.41736	1.41736	91.4301	64.5075	0.00150463	0.0366816	1.8365	1.8365	91.4301	49.785
ENSG00000139679	LPAR6	0.00237266	0.661068	1.71849	1.71849	144.506	84.0888	0.00117207	0.105504	2.47849	2.47849	144.506	58.3041	5.70613e-12	3.33866e-08	4.2604	4.2604	144.506	33.9184
ENSG00000175087	PDIK1L	0.00258965	0.665863	2.3663	2.3663	30.9313	13.0716	0.0013633	0.107793	4.60119	4.60119	30.9313	6.72246	7.00544e-05	0.00630598	3.37566	3.37566	30.9313	9.16303
ENSG00000175073	VCPIP1	0.00280699	0.665863	1.67882	1.67882	140.954	83.9606	0.0224768	0.347252	1.84819	1.84819	140.954	76.2662	0.026073	0.189743	1.48736	1.48736	140.954	94.7685
ENSG00000244363	RPL7P23	0.00287879	0.665863	0.345018	-2.8984	20.9695	60.7779	0.0906656	0.607657	0.394538	-2.53461	20.9695	53.1494	0.107721	0.392252	0.547167	-1.8276	20.9695	38.3237
ENSG00000163104	SMARCAD1	0.00301016	0.665863	2.10406	2.10406	81.0424	38.5172	0.0511226	0.492982	2.13334	2.13334	81.0424	37.9886	0.0982893	0.376122	1.52845	1.52845	81.0424	53.0227
ENSG00000198886	MT-ND4	0.00303101	0.665863	0.458146	-2.18271	8802.11	19212.5	0.58297	0.892702	0.79935	-1.25102	8802.11	11011.6	0.00310172	0.0576931	0.44557	-2.24432	8802.11	19754.7
ENSG00000142188	TMEM50B	0.00324465	0.665863	0.581969	-1.7183	71.9406	123.616	0.813635	0.956573	1.07021	1.07021	71.9406	67.2211	0.0992498	0.378067	0.729517	-1.37077	71.9406	98.6139
ENSG00000173559	NABP1	0.0033447	0.665863	1.45527	1.45527	169.416	116.415	0.00194398	0.124992	1.85869	1.85869	169.416	91.1481	0.00230071	0.0475669	1.4959	1.4959	169.416	113.253
ENSG00000137413	TAF8	0.00339522	0.665863	1.81179	1.81179	73.2057	40.4051	0.247718	0.749787	1.43144	1.43144	73.2057	51.1414	0.226771	0.555626	1.2828	1.2828	73.2057	57.067
ENSG00000141458	NPC1	0.0034141	0.665863	2.2426	2.2426	42.8483	19.1065	0.00131178	0.106601	4.2464	4.2464	42.8483	10.0905	0.0101506	0.112911	2.07489	2.07489	42.8483	20.6509
ENSG00000175567	UCP2	0.00366757	0.679157	0.488438	-2.04734	132.398	271.064	0.00950133	0.241243	0.372657	-2.68343	132.398	355.281	9.65281e-05	0.00806837	0.369334	-2.70758	132.398	358.478
ENSG00000143390	RFX5	0.00375986	0.679157	1.98977	1.98977	22.642	11.3792	0.871212	0.966887	1.05744	1.05744	22.642	21.412	0.231667	0.560397	1.32129	1.32129	22.642	17.1362
ENSG00000279423	---	0.00406157	0.679157	0.315142	-3.17317	14.5263	46.0945	0.174417	0.704898	0.430998	-2.32019	14.5263	33.7039	0.0162083	0.142909	0.366912	-2.72545	14.5263	39.5907
ENSG00000196950	SLC39A10	0.00414812	0.679157	1.87954	1.87954	245.41	130.569	0.0118767	0.264358	2.3646	2.3646	245.41	103.785	3.8192e-05	0.00429733	2.57779	2.57779	245.41	95.2017
ENSG00000198840	MT-ND3	0.00422806	0.679157	0.44175	-2.26372	14862.9	33645.6	0.438882	0.834322	0.709998	-1.40845	14862.9	20933.8	0.00592517	0.0806237	0.442223	-2.2613	14862.9	33609.6
ENSG00000161800	RACGAP1	0.00427572	0.679157	0.293616	-3.40581	11.3735	38.7359	0.868871	0.966887	0.894595	-1.11782	11.3735	12.7135	0.202478	0.529829	0.563297	-1.77526	11.3735	20.1909
ENSG00000137055	PLAA	0.00429479	0.679157	1.79674	1.79674	33.6517	18.7293	0.21053	0.731072	1.47679	1.47679	33.6517	22.787	0.0143471	0.135994	1.67203	1.67203	33.6517	20.1262
ENSG00000163110	PDLIM5	0.00490246	0.731406	0.571462	-1.7499	100.563	175.975	0.353499	0.804633	0.751509	-1.33066	100.563	133.815	0.00944371	0.109437	0.585746	-1.70723	100.563	171.684
ENSG00000179918	SEPHS2	0.00502904	0.731406	1.48797	1.48797	78.2742	52.6048	0.00499862	0.200321	1.87185	1.87185	78.2742	41.8165	1.28913e-05	0.0021822	1.93172	1.93172	78.2742	40.5205
ENSG00000005020	SKAP2	0.00512751	0.731406	2.05928	2.05928	59.7382	29.0092	0.944604	0.984214	1.02749	1.02749	59.7382	58.14	0.150835	0.461095	1.46028	1.46028	59.7382	40.9088
ENSG00000121851	POLR3GL	0.00517677	0.731406	0.621638	-1.60865	64.0019	102.957	0.00987572	0.243056	0.511919	-1.95343	64.0019	125.023	0.0282924	0.198488	0.678319	-1.47423	64.0019	94.3536
ENSG00000160888	IER2	0.00535967	0.731406	0.616421	-1.62227	285.171	462.624	0.000551829	0.0965931	0.396287	-2.52343	285.171	719.608	2.88305e-06	0.00111785	0.431024	-2.32006	285.171	661.613
ENSG00000131165	CHMP1A	0.00588454	0.731406	0.555884	-1.79894	38.8181	69.8314	0.253671	0.749787	0.686854	-1.45591	38.8181	56.5158	0.0542052	0.277562	0.6526	-1.53233	38.8181	59.4823
ENSG00000124226	RNF114	0.00596033	0.731406	0.651656	-1.53455	73.9018	113.406	0.169246	0.703071	0.71923	-1.39038	73.9018	102.751	0.136093	0.436247	0.784893	-1.27406	73.9018	94.1553
ENSG00000187741	FANCA	0.00608887	0.731406	2.49892	2.49892	15.264	6.10823	0.664226	0.920406	1.23449	1.23449	15.264	12.3646	0.547356	0.802488	0.826077	-1.21054	15.264	18.4777
ENSG00000132570	PCBD2	0.00620174	0.731406	0.576335	-1.7351	32.3454	56.1227	0.899232	0.972533	1.04103	1.04103	32.3454	31.0706	0.671964	0.86715	0.913365	-1.09485	32.3454	35.4135
ENSG00000130724	CHMP2A	0.00631446	0.731406	0.559158	-1.7884	48.8111	87.2941	0.0022869	0.129909	0.37168	-2.69049	48.8111	131.326	8.83821e-06	0.00178319	0.378526	-2.64182	48.8111	128.95
ENSG00000281103	TRG-AS1	0.00657897	0.731406	1.84467	1.84467	71.5124	38.7671	0.597411	0.899499	0.835686	-1.19662	71.5124	85.5733	0.165756	0.481356	1.37742	1.37742	71.5124	51.9176
ENSG00000139737	SLAIN1	0.00663432	0.731406	2.26838	2.26838	28.3602	12.5024	0.853417	0.963367	1.0864	1.0864	28.3602	26.1047	0.860345	0.95592	1.05397	1.05397	28.3602	26.9079
ENSG00000115419	GLS	0.00676062	0.731406	1.39334	1.39334	459.514	329.793	0.00998948	0.243535	1.63156	1.63156	459.514	281.641	0.160711	0.476837	1.19414	1.19414	459.514	384.806
ENSG00000198624	CCDC69	0.00692957	0.731406	0.462871	-2.16043	254.068	548.896	0.44446	0.834567	0.713215	-1.4021	254.068	356.229	0.0230875	0.177743	0.510305	-1.95961	254.068	497.875
ENSG00000274265	---	0.00701532	0.731406	0.561287	-1.78162	250.168	445.704	0.538616	0.878334	1.22723	1.22723	250.168	203.848	0.00066171	0.0223227	0.469281	-2.13092	250.168	533.087
ENSG00000123338	NCKAP1L	0.00707786	0.731406	0.612755	-1.63197	380.897	621.614	0.653359	0.915877	0.881105	-1.13494	380.897	432.294	0.043613	0.248054	0.683266	-1.46356	380.897	557.465
ENSG00000222041	CYTOR	0.00719295	0.731406	1.61398	1.61398	133.179	82.5159	0.746129	0.938839	0.915908	-1.09181	133.179	145.407	0.160611	0.476781	1.29325	1.29325	133.179	102.98
ENSG00000012061	ERCC1	0.00725561	0.731406	0.469598	-2.12948	16.141	34.3719	0.35588	0.806763	0.668717	-1.4954	16.141	24.1373	0.040364	0.241235	0.549177	-1.82091	16.141	29.3912
ENSG00000136603	SKIL	0.00729341	0.731406	1.95848	1.95848	64.5505	32.9594	0.277679	0.760636	1.51716	1.51716	64.5505	42.5468	0.00069241	0.0226329	2.46957	2.46957	64.5505	26.1384
ENSG00000184465	WDR27	0.00729574	0.731406	2.24001	2.24001	34.2796	15.3033	0.408858	0.830135	1.45647	1.45647	34.2796	23.5361	0.431995	0.735005	1.26753	1.26753	34.2796	27.0445
ENSG00000158669	GPAT4	0.00730037	0.731406	0.604221	-1.65502	83.3455	137.939	0.37144	0.814884	0.771267	-1.29657	83.3455	108.063	0.00714837	0.0914999	0.593016	-1.6863	83.3455	140.545
ENSG00000171943	SRGAP2C	0.00754259	0.731406	1.66706	1.66706	88.4324	53.0469	0.515352	0.865531	1.20918	1.20918	88.4324	73.1341	0.0500367	0.2653	1.47062	1.47062	88.4324	60.1325
ENSG00000273611	ZNHIT3	0.00758195	0.731406	0.490899	-2.03708	61.48	125.24	0.68608	0.927534	0.845944	-1.18211	61.48	72.6762	0.748467	0.903317	0.914078	-1.094	61.48	67.259
ENSG00000261915	---	0.00762533	0.731406	0.44771	-2.23359	13.2867	29.6771	0.150491	0.684144	0.514928	-1.94202	13.2867	25.8031	0.0102966	0.113128	0.450382	-2.22034	13.2867	29.501
ENSG00000163602	RYBP	0.00826843	0.738076	1.46368	1.46368	165.929	113.365	0.6122	0.904149	1.11849	1.11849	165.929	148.351	0.102724	0.384224	1.27414	1.27414	165.929	130.229
ENSG00000174574	AKIRIN1	0.00834016	0.738076	0.54843	-1.82339	125.041	227.999	0.744175	0.937792	0.891086	-1.12223	125.041	140.325	0.179952	0.497353	0.727989	-1.37365	125.041	171.763
ENSG00000130522	JUND	0.00841749	0.738076	0.566442	-1.76541	466.005	822.688	0.00334462	0.163078	0.375728	-2.6615	466.005	1240.27	0.000823994	0.0255089	0.47307	-2.11385	466.005	985.067
ENSG00000109171	SLAIN2	0.00851927	0.738076	1.43664	1.43664	145.56	101.32	0.129851	0.655708	1.37927	1.37927	145.56	105.534	0.000194444	0.0123662	1.71374	1.71374	145.56	84.9369
ENSG00000146872	TLK2	0.00852701	0.738076	0.618081	-1.61791	117.282	189.752	0.594657	0.898219	1.16408	1.16408	117.282	100.751	0.311505	0.642898	0.824727	-1.21252	117.282	142.207
ENSG00000138814	PPP3CA	0.00872912	0.738076	1.60376	1.60376	265.641	165.637	0.94201	0.983382	1.02036	1.02036	265.641	260.341	0.0767501	0.328504	1.39083	1.39083	265.641	190.995
ENSG00000144028	SNRNP200	0.00879115	0.738076	0.684171	-1.46162	203.129	296.898	0.308987	0.780269	1.25872	1.25872	203.129	161.378	0.251273	0.57996	0.841377	-1.18853	203.129	241.425
ENSG00000265808	SEC22B	0.0088027	0.738076	1.43971	1.43971	114.925	79.8251	0.512535	0.864469	1.14911	1.14911	114.925	100.012	0.0610932	0.292935	1.30697	1.30697	114.925	87.9321
ENSG00000213051	RPL5P5	0.00883017	0.738076	0.409253	-2.44347	50.2004	122.663	0.00966265	0.241243	0.256753	-3.89479	50.2004	195.52	0.000581856	0.0214233	0.296699	-3.37042	50.2004	169.197
ENSG00000100519	PSMC6	0.00912314	0.749218	0.673507	-1.48477	242.331	359.805	0.688047	0.927604	1.09925	1.09925	242.331	220.452	0.237312	0.566392	0.830158	-1.20459	242.331	291.909
ENSG00000160075	SSU72	0.00921957	0.749218	0.614894	-1.6263	78.024	126.89	0.118406	0.644679	0.638183	-1.56695	78.024	122.259	0.00690833	0.0896244	0.593512	-1.68489	78.024	131.461
ENSG00000129925	PGAP6	0.00989778	0.767023	0.503662	-1.98546	38.1343	75.714	0.725364	0.935277	1.15811	1.15811	38.1343	32.9281	0.789071	0.922091	0.927732	-1.0779	38.1343	41.1048
ENSG00000103257	SLC7A5	0.0100892	0.767023	2.39686	2.39686	54.9047	22.9069	0.221836	0.737393	1.89373	1.89373	54.9047	28.9928	0.154824	0.467428	1.63989	1.63989	54.9047	33.4807
ENSG00000102245	CD40LG	0.0102636	0.767023	0.52101	-1.91935	41.1522	78.9854	0.0201578	0.337746	0.404923	-2.4696	41.1522	101.63	0.0111147	0.119325	0.51257	-1.95095	41.1522	80.286
ENSG00000110344	UBE4A	0.0103794	0.767023	1.63219	1.63219	67.1935	41.1676	0.724695	0.935277	0.903697	-1.10657	67.1935	74.354	0.0092205	0.107898	1.68967	1.68967	67.1935	39.7672
ENSG00000198900	TOP1	0.0104038	0.767023	1.47158	1.47158	373.74	253.972	0.112865	0.636173	1.44748	1.44748	373.74	258.2	0.0521292	0.271041	1.35393	1.35393	373.74	276.04
ENSG00000008513	ST3GAL1	0.0104547	0.767023	0.587351	-1.70256	136.394	232.219	0.670705	0.92239	0.871934	-1.14688	136.394	156.427	0.865687	0.958016	0.963891	-1.03746	136.394	141.504
ENSG00000182810	DDX28	0.0104975	0.767023	0.476331	-2.09938	19.8179	41.6053	0.439245	0.834322	0.706387	-1.41565	19.8179	28.0552	0.00729832	0.0925913	0.448284	-2.23073	19.8179	44.2083
ENSG00000105122	RASAL3	0.0106576	0.767023	0.55865	-1.79003	86.0063	153.954	0.487122	0.85561	0.782328	-1.27824	86.0063	109.936	0.01218	0.124817	0.553175	-1.80775	86.0063	155.478
ENSG00000116918	TSNAX	0.0106803	0.767023	0.669712	-1.49318	117.762	175.84	0.0356369	0.420386	0.602322	-1.66024	117.762	195.514	0.0124538	0.126946	0.666042	-1.50141	117.762	176.809
ENSG00000197329	PELI1	0.0108012	0.767023	0.528223	-1.89314	112.999	213.924	0.139578	0.670502	0.564561	-1.77129	112.999	200.154	0.148414	0.457519	0.686259	-1.45718	112.999	164.66
ENSG00000149480	MTA2	0.0108807	0.767023	0.643634	-1.55368	65.7465	102.149	0.0436828	0.46811	0.585961	-1.7066	65.7465	112.203	0.0289102	0.200624	0.675663	-1.48003	65.7465	97.3066
ENSG00000141524	TMC6	0.0113882	0.775008	0.606019	-1.65011	143.433	236.681	0.042218	0.455752	0.537907	-1.85906	143.433	266.65	0.00037903	0.0174761	0.483026	-2.07028	143.433	296.947
ENSG00000232573	RPL3P4	0.0115139	0.775008	0.622637	-1.60607	877.119	1408.72	0.00332196	0.163078	0.42658	-2.34423	877.119	2056.17	9.33212e-05	0.00791337	0.467619	-2.13849	877.119	1875.71
ENSG00000154930	ACSS1	0.0116719	0.775008	0.6609	-1.51309	80.0215	121.079	0.727008	0.935277	0.914813	-1.09312	80.0215	87.473	0.00367272	0.0617502	0.611376	-1.63565	80.0215	130.887
ENSG00000119403	PHF19	0.0116917	0.775008	2.06923	2.06923	52.1114	25.184	0.103338	0.629308	2.06974	2.06974	52.1114	25.1777	0.279335	0.610735	1.37443	1.37443	52.1114	37.9149
ENSG00000271869	DCTN6-DT	0.0120291	0.775008	0.4579	-2.18388	64.2845	140.39	0.000822167	0.0993677	0.201765	-4.95627	64.2845	318.611	0.00379317	0.063137	0.392931	-2.54498	64.2845	163.603
ENSG00000074966	TXK	0.0122358	0.775008	0.412325	-2.42527	118.948	288.481	0.78676	0.94913	0.862094	-1.15997	118.948	137.976	0.94196	0.983095	1.02729	1.02729	118.948	115.787
ENSG00000197959	DNM3	0.0122777	0.775008	2.57479	2.57479	15.9184	6.18241	0.349758	0.802906	1.69915	1.69915	15.9184	9.36843	0.174276	0.491785	1.66373	1.66373	15.9184	9.56787
ENSG00000139117	CPNE8	0.012376	0.775008	2.69954	2.69954	22.2786	8.25274	0.150092	0.684144	2.41202	2.41202	22.2786	9.23649	0.00303013	0.0568648	3.57171	3.57171	22.2786	6.23752
ENSG00000157514	TSC22D3	0.0124247	0.775008	0.412334	-2.42522	856.947	2078.28	0.0628282	0.539014	0.360183	-2.77636	856.947	2379.2	0.0303248	0.20683	0.450753	-2.21851	856.947	1901.15
ENSG00000092871	RFFL	0.0125588	0.775008	0.547034	-1.82804	65.2578	119.294	0.960649	0.988539	1.01876	1.01876	65.2578	64.0562	0.0031905	0.0578214	4.82075	4.82075	65.2578	13.5369
ENSG00000241728	---	0.0126788	0.775008	0.545975	-1.83159	25.8101	47.2734	0.774516	0.94509	0.897019	-1.1148	25.8101	28.7732	0.267794	0.597536	0.754336	-1.32567	25.8101	34.2156
ENSG00000102317	RBM3	0.0126896	0.775008	0.507378	-1.97092	508.669	1002.54	0.0698378	0.555347	0.465752	-2.14706	508.669	1092.14	0.0439921	0.248858	0.565935	-1.76699	508.669	898.811
ENSG00000196247	ZNF107	0.0127159	0.775008	1.76673	1.76673	60.085	34.0091	0.0342138	0.416186	2.1293	2.1293	60.085	28.2182	3.43896e-06	0.00111785	6.57302	6.57302	60.085	9.14116
ENSG00000110934	BIN2	0.0130326	0.776575	0.637301	-1.56912	216.507	339.725	0.083333	0.591795	0.61548	-1.62475	216.507	351.77	0.0648311	0.300899	0.706166	-1.4161	216.507	306.596
ENSG00000130414	NDUFA10	0.013312	0.776575	0.647413	-1.54461	141.712	218.89	0.006566	0.212806	0.480001	-2.08333	141.712	295.233	0.000329713	0.0163122	0.52111	-1.91898	141.712	271.943
ENSG00000181904	C5orf24	0.0133711	0.776575	1.49407	1.49407	71.5791	47.9089	0.163839	0.697991	1.4156	1.4156	71.5791	50.5645	0.00816088	0.0998939	1.56106	1.56106	71.5791	45.8528
ENSG00000113448	PDE4D	0.0136291	0.776575	1.65547	1.65547	110.799	66.929	0.177302	0.705032	1.53016	1.53016	110.799	72.4098	0.435202	0.737108	1.17749	1.17749	110.799	94.0974
ENSG00000112031	MTRF1L	0.0141204	0.776575	1.63576	1.63576	38.8814	23.7696	0.770951	0.944267	1.09133	1.09133	38.8814	35.6277	0.796302	0.926765	1.05283	1.05283	38.8814	36.9305
ENSG00000167552	TUBA1A	0.0141375	0.776575	0.533967	-1.87278	154.832	289.965	0.00923221	0.239961	0.35786	-2.79439	154.832	432.66	0.00121254	0.0322481	0.424194	-2.35741	154.832	365.003
ENSG00000198938	MT-CO3	0.0142442	0.776575	0.589074	-1.69758	7660.15	13003.7	0.582112	0.892702	0.83188	-1.2021	7660.15	9208.23	0.0545053	0.277562	0.649868	-1.53877	7660.15	11787.2
ENSG00000029364	SLC39A9	0.0142712	0.776575	1.75919	1.75919	31.5072	17.9101	0.93277	0.982844	1.02932	1.02932	31.5072	30.6097	0.829828	0.942964	0.952305	-1.05008	31.5072	33.0852
ENSG00000058063	ATP11B	0.0142868	0.776575	1.56219	1.56219	76.028	48.6677	0.237655	0.745985	1.39122	1.39122	76.028	54.6486	0.00259355	0.051607	1.77696	1.77696	76.028	42.7855
ENSG00000275895	U2AF1L5	0.0142953	0.776575	0.597557	-1.67348	116.834	195.52	0.0377203	0.427828	0.510132	-1.96028	116.834	229.028	0.013817	0.134062	0.584821	-1.70992	116.834	199.778
ENSG00000162927	PUS10	0.0143302	0.776575	1.91024	1.91024	19.2669	10.0861	0.396186	0.82473	1.39941	1.39941	19.2669	13.7678	0.492621	0.769118	1.19417	1.19417	19.2669	16.1342
ENSG00000175470	PPP2R2D	0.014414	0.776575	1.81086	1.81086	59.9643	33.1137	0.353932	0.805153	1.41132	1.41132	59.9643	42.4882	0.217469	0.546988	1.35732	1.35732	59.9643	44.1785
ENSG00000198945	L3MBTL3	0.014467	0.776575	1.64934	1.64934	99.1998	60.1453	0.0226874	0.348409	2.07002	2.07002	99.1998	47.922	5.94195e-09	1.73832e-05	5.21516	5.21516	99.1998	19.0214
ENSG00000288839	---	0.0146634	0.779234	0.463769	-2.15625	48.6466	104.894	0.62063	0.905766	0.78519	-1.27358	48.6466	61.9552	0.184596	0.504687	0.647464	-1.54449	48.6466	75.134
ENSG00000204514	ZNF814	0.0147829	0.779234	0.579016	-1.72707	35.3564	61.063	0.984998	0.995918	1.00663	1.00663	35.3564	35.1237	0.701413	0.881729	0.913187	-1.09507	35.3564	38.7176
ENSG00000186020	ZNF529	0.0149664	0.781305	1.70597	1.70597	51.3733	30.1139	0.0230495	0.349217	2.19163	2.19163	51.3733	23.4406	0.00106137	0.0302959	2.12922	2.12922	51.3733	24.1277
ENSG00000121966	CXCR4	0.0153134	0.781305	0.556306	-1.79757	635.034	1141.52	0.00858972	0.233094	0.373951	-2.67415	635.034	1698.17	0.00745483	0.0942078	0.510856	-1.9575	635.034	1243.08
ENSG00000176783	RUFY1	0.0153592	0.781305	1.52761	1.52761	66.6687	43.6424	0.105686	0.632277	1.54829	1.54829	66.6687	43.0596	0.0702565	0.312291	1.38236	1.38236	66.6687	48.2283
ENSG00000154710	RABGEF1	0.0154948	0.781305	1.93718	1.93718	39.1754	20.2229	0.931449	0.982844	0.965335	-1.03591	39.1754	40.5822	0.492172	0.769118	1.20867	1.20867	39.1754	32.4121
ENSG00000081059	TCF7	0.0158736	0.781305	0.609935	-1.63952	316.263	518.52	0.0818255	0.588159	0.575965	-1.73622	316.263	549.102	0.00209	0.0444676	0.51996	-1.92323	316.263	608.246
ENSG00000170946	DNAJC24	0.0159819	0.781305	1.81442	1.81442	54.9011	30.2582	0.106523	0.6334	1.85545	1.85545	54.9011	29.5892	3.01803e-05	0.0035317	3.21317	3.21317	54.9011	17.0863
ENSG00000052126	PLEKHA5	0.0160566	0.781305	1.7311	1.7311	39.6507	22.9049	0.0167843	0.308768	2.37713	2.37713	39.6507	16.6801	0.0354871	0.224228	1.63388	1.63388	39.6507	24.2678
ENSG00000149089	APIP	0.0160688	0.781305	1.89102	1.89102	32.0995	16.9748	0.0986885	0.622227	1.97097	1.97097	32.0995	16.2862	0.0348063	0.222555	1.77234	1.77234	32.0995	18.1114
ENSG00000198712	MT-CO2	0.0165571	0.781305	0.510657	-1.95826	6603.52	12931.4	0.331543	0.793493	0.655828	-1.52479	6603.52	10069	0.0157116	0.141211	0.494967	-2.02034	6603.52	13341.3
ENSG00000089220	PEBP1	0.0166509	0.781305	0.721386	-1.38622	324.401	449.692	0.00057855	0.0965931	0.485525	-2.05963	324.401	668.145	4.89731e-05	0.00502705	0.563933	-1.77326	324.401	575.248
ENSG00000116396	KCNC4	0.0169038	0.781305	2.06572	2.06572	35.7005	17.2823	0.00685172	0.216543	3.77629	3.77629	35.7005	9.45386	0.00160107	0.0383929	2.74051	2.74051	35.7005	13.027
ENSG00000182010	RTKN2	0.0169616	0.781305	1.54758	1.54758	669.099	432.352	0.000703448	0.0993677	2.62158	2.62158	669.099	255.227	0.00139415	0.0353125	1.83499	1.83499	669.099	364.634
ENSG00000070190	DAPP1	0.0170043	0.781305	1.77681	1.77681	84.0097	47.2811	0.818382	0.957644	1.08816	1.08816	84.0097	77.2035	0.0634515	0.298381	1.5876	1.5876	84.0097	52.9161
ENSG00000115760	BIRC6	0.0170378	0.781305	1.47781	1.47781	265.806	179.864	0.052831	0.501838	1.63449	1.63449	265.806	162.623	0.00966714	0.110258	1.55149	1.55149	265.806	171.323
ENSG00000180008	SOCS4	0.0172353	0.781305	1.59184	1.59184	53.1494	33.3887	0.00524111	0.201748	2.38872	2.38872	53.1494	22.2501	4.88774e-07	0.000476636	3.16618	3.16618	53.1494	16.7866
ENSG00000090060	PAPOLA	0.0173465	0.781305	1.33474	1.33474	373.199	279.605	0.598009	0.899704	1.10357	1.10357	373.199	338.174	0.00866391	0.104093	1.39212	1.39212	373.199	268.08
ENSG00000121749	TBC1D15	0.0173648	0.781305	1.58428	1.58428	320.106	202.051	0.00407055	0.181827	2.37549	2.37549	320.106	134.753	0.00311588	0.0576931	1.8106	1.8106	320.106	176.795
ENSG00000169976	SF3B5	0.0174274	0.781305	0.677093	-1.4769	97.1739	143.516	0.00199746	0.125327	0.461075	-2.16885	97.1739	210.755	0.016218	0.142909	0.664334	-1.50527	97.1739	146.273
ENSG00000203668	CHML	0.017467	0.781305	1.66808	1.66808	53.1788	31.8803	0.0787733	0.579023	1.79997	1.79997	53.1788	29.5442	0.000611781	0.0219593	2.19381	2.19381	53.1788	24.2403
ENSG00000120519	SLC10A7	0.0174929	0.781305	1.82399	1.82399	35.4278	19.4232	0.0332828	0.412818	2.33866	2.33866	35.4278	15.1487	2.21202e-05	0.00294148	3.62078	3.62078	35.4278	9.78458
ENSG00000163832	ELP6	0.0177219	0.785535	0.568555	-1.75884	17.5913	30.9404	0.748847	0.938873	0.887416	-1.12687	17.5913	19.8231	0.244016	0.573619	1.40742	1.40742	17.5913	12.499
ENSG00000013725	CD6	0.0180892	0.795787	0.632634	-1.58069	191.015	301.935	0.622275	0.906109	0.86255	-1.15935	191.015	221.453	0.233256	0.562061	1.27624	1.27624	191.015	149.67
ENSG00000164120	HPGD	0.0183241	0.796701	1.61729	1.61729	90.6879	56.074	0.00276993	0.150063	2.62501	2.62501	90.6879	34.5476	8.01484e-06	0.00174367	2.64978	2.64978	90.6879	34.2248
ENSG00000244879	GABPB1-AS1	0.0183823	0.796701	0.559988	-1.78575	488.418	872.194	0.687119	0.927534	1.16605	1.16605	488.418	418.865	0.775714	0.916909	1.07561	1.07561	488.418	454.085
ENSG00000174721	FGFBP3	0.0185669	0.798785	2.53859	2.53859	6.44253	2.53784	0.231886	0.743971	0.544192	-1.83759	6.44253	11.8387	0.987737	0.997087	1.0055	1.0055	6.44253	6.40731
ENSG00000164494	PDSS2	0.0187987	0.802856	0.571774	-1.74894	26.4609	46.2786	0.0616896	0.537122	0.507682	-1.96974	26.4609	52.121	0.00659907	0.0866164	0.51416	-1.94492	26.4609	51.4643
ENSG00000175893	ZDHHC21	0.0189899	0.805146	1.58684	1.58684	61.2997	38.63	0.508011	0.862134	1.21961	1.21961	61.2997	50.2617	7.60541e-06	0.00174367	2.91786	2.91786	61.2997	21.0085
ENSG00000136738	STAM	0.0191488	0.80604	1.48179	1.48179	248.002	167.367	0.00520606	0.201726	2.07738	2.07738	248.002	119.382	0.00239753	0.0493823	1.69776	1.69776	248.002	146.076
ENSG00000100522	GNPNAT1	0.0194268	0.806851	1.92327	1.92327	30.339	15.7747	0.768128	0.944052	1.13188	1.13188	30.339	26.8041	0.000575629	0.0214233	3.68126	3.68126	30.339	8.24148
ENSG00000139436	GIT2	0.0196596	0.806851	1.50456	1.50456	119.323	79.3079	0.802821	0.953302	1.06914	1.06914	119.323	111.607	0.176786	0.493599	1.27553	1.27553	119.323	93.5478
ENSG00000113048	MRPS27	0.0196896	0.806851	1.67916	1.67916	60.4361	35.9918	0.666838	0.92101	0.865649	-1.1552	60.4361	69.8159	0.344737	0.672576	1.23921	1.23921	60.4361	48.7698
ENSG00000130706	ADRM1	0.0197516	0.806851	0.564003	-1.77304	33.0017	58.5133	0.259755	0.753835	0.652658	-1.5322	33.0017	50.5651	0.00128918	0.0333762	0.443472	-2.25493	33.0017	74.4167
ENSG00000169905	TOR1AIP2	0.0199889	0.806851	1.46006	1.46006	116.624	79.8764	0.21285	0.733853	1.36646	1.36646	116.624	85.3475	0.0317602	0.212	1.43467	1.43467	116.624	81.2901
ENSG00000180172	RPS12P23	0.0199954	0.806851	0.564046	-1.7729	332.068	588.724	0.000846134	0.0993677	0.280918	-3.55976	332.068	1182.08	0.00013936	0.0105394	0.378218	-2.64398	332.068	877.979
ENSG00000167986	DDB1	0.0202638	0.808596	0.564045	-1.77291	153.446	272.045	0.661632	0.919526	0.845906	-1.18216	153.446	181.398	0.0169221	0.147999	0.542857	-1.84211	153.446	282.663
ENSG00000265972	TXNIP	0.0203785	0.808596	0.514041	-1.94537	2020.07	3929.79	0.0128769	0.272981	0.331118	-3.02007	2020.07	6100.76	0.205049	0.534019	0.685515	-1.45876	2020.07	2946.8
ENSG00000132002	DNAJB1	0.0205791	0.808596	0.575542	-1.73749	325.564	565.664	0.0187721	0.325921	0.420217	-2.37972	325.564	774.751	0.000262986	0.0141168	0.405472	-2.46626	325.564	802.924
ENSG00000168884	TNIP2	0.020726	0.808596	1.86176	1.86176	23.6917	12.7254	0.53776	0.877666	1.28224	1.28224	23.6917	18.4769	0.881233	0.964834	0.961267	-1.04029	23.6917	24.6464
ENSG00000198373	WWP2	0.0207297	0.808596	0.691591	-1.44594	69.6467	100.705	0.102466	0.62748	0.670899	-1.49054	69.6467	103.811	0.131723	0.431805	0.778658	-1.28426	69.6467	89.4445
ENSG00000103187	COTL1	0.0210193	0.814462	0.558506	-1.79049	179.609	321.589	0.0178042	0.320991	0.396977	-2.51904	179.609	452.442	0.218631	0.547365	0.723702	-1.38178	179.609	248.181
ENSG00000105497	ZNF175	0.0215081	0.827919	0.542422	-1.84358	17.4393	32.1508	0.855682	0.963367	0.926851	-1.07892	17.4393	18.8157	0.0796276	0.335596	0.616553	-1.62192	17.4393	28.2852
ENSG00000248527	MTATP6P1	0.0219485	0.839352	0.439819	-2.27367	510.364	1160.4	0.356859	0.807282	0.599511	-1.66803	510.364	851.302	0.000562714	0.0214233	0.277128	-3.60844	510.364	1841.62
ENSG00000104064	GABPB1	0.0221947	0.840462	1.96558	1.96558	35.5072	18.0645	0.125755	0.651719	2.01646	2.01646	35.5072	17.6087	0.011243	0.1202	2.18286	2.18286	35.5072	16.2664
ENSG00000116191	RALGPS2	0.0222648	0.840462	2.11309	2.11309	37.2903	17.6473	0.246045	0.748428	0.56704	-1.76354	37.2903	65.7631	0.573719	0.817742	1.20606	1.20606	37.2903	30.9191
ENSG00000154027	AK5	0.0224943	0.840708	0.628893	-1.5901	22.4572	35.709	0.531205	0.873792	0.820859	-1.21824	22.4572	27.3581	0.0500166	0.2653	0.662909	-1.5085	22.4572	33.8767
ENSG00000103544	VPS35L	0.0228649	0.840708	0.61934	-1.61462	26.3518	42.5483	0.766947	0.944052	0.907195	-1.1023	26.3518	29.0476	0.049482	0.26416	0.652378	-1.53285	26.3518	40.3935
ENSG00000233927	RPS28	0.0229447	0.840708	0.521046	-1.91922	1708.24	3278.48	0.882962	0.96808	1.06757	1.06757	1708.24	1600.12	0.0823532	0.342953	0.596342	-1.67689	1708.24	2864.53
ENSG00000125037	EMC3	0.0229461	0.840708	0.638099	-1.56715	44.3504	69.5039	0.614706	0.904701	0.857062	-1.16678	44.3504	51.747	0.508319	0.778976	0.871748	-1.14712	44.3504	50.8753
ENSG00000117151	CTBS	0.0229898	0.840708	1.66508	1.66508	47.9196	28.7791	0.217409	0.733853	1.53027	1.53027	47.9196	31.3145	1.75379e-05	0.00256536	9.41269	9.41269	47.9196	5.09096
ENSG00000241685	ARPC1A	0.0234216	0.851177	0.427361	-2.33994	18.4547	43.1828	0.84575	0.963204	0.892282	-1.12072	18.4547	20.6825	0.0903317	0.359545	0.516955	-1.93441	18.4547	35.6988
ENSG00000146802	TMEM168	0.023725	0.856884	0.635603	-1.57331	37.1752	58.4881	0.0210041	0.343617	2.16167	2.16167	37.1752	17.1974	0.0193725	0.161568	1.7027	1.7027	37.1752	21.833
ENSG00000147454	SLC25A37	0.0239381	0.857709	0.721333	-1.38632	87.0998	120.748	0.796167	0.952438	0.943652	-1.05971	87.0998	92.3008	0.642221	0.856539	0.932044	-1.07291	87.0998	93.4503
ENSG00000275183	LENG9	0.0240411	0.857709	0.527215	-1.89676	96.641	183.305	0.42192	0.831134	0.702741	-1.423	96.641	137.52	0.0151079	0.13812	0.489438	-2.04316	96.641	197.453
ENSG00000177663	IL17RA	0.0241902	0.8578	0.666212	-1.50102	169.695	254.717	0.855848	0.963367	1.05217	1.05217	169.695	161.281	0.0732089	0.319789	0.715507	-1.39761	169.695	237.168
ENSG00000146285	SCML4	0.0247743	0.862008	0.605116	-1.65258	86.7878	143.423	0.21337	0.733853	0.650568	-1.53712	86.7878	133.403	0.0168486	0.147576	0.574828	-1.73965	86.7878	150.98
ENSG00000127125	PPCS	0.0248278	0.862008	1.44882	1.44882	112.994	77.9904	0.794054	0.951661	0.93648	-1.06783	112.994	120.658	0.483831	0.768221	1.12579	1.12579	112.994	100.369
ENSG00000125977	EIF2S2	0.024894	0.862008	1.37099	1.37099	412.528	300.898	0.177418	0.705032	0.747135	-1.33845	412.528	552.147	0.697591	0.880795	0.945164	-1.05802	412.528	436.462
ENSG00000139719	VPS33A	0.0248982	0.862008	0.63648	-1.57114	81.6172	128.232	0.59917	0.89993	0.848696	-1.17828	81.6172	96.1678	0.647028	0.858252	0.907973	-1.10135	81.6172	89.8894
ENSG00000158796	DEDD	0.0251158	0.864428	1.56828	1.56828	45.9574	29.3043	0.323667	0.79156	1.35408	1.35408	45.9574	33.9399	0.0435089	0.247878	1.51878	1.51878	45.9574	30.2593
ENSG00000144021	CIAO1	0.0253733	0.867183	0.662866	-1.5086	78.7858	118.856	0.752066	0.940071	0.913772	-1.09437	78.7858	86.2204	0.664992	0.864662	0.919993	-1.08697	78.7858	85.6374
ENSG00000131238	PPT1	0.0255529	0.867183	0.546191	-1.83086	31.2206	57.1607	0.171821	0.703071	0.566043	-1.76665	31.2206	55.1559	0.030213	0.206756	0.544798	-1.83554	31.2206	57.3068
ENSG00000109572	CLCN3	0.0257583	0.867183	1.54907	1.54907	81.2136	52.4275	0.29091	0.767642	1.37542	1.37542	81.2136	59.0466	0.20973	0.538801	1.28693	1.28693	81.2136	63.1065
ENSG00000075089	ACTR6	0.0257887	0.867183	1.46271	1.46271	43.1023	29.4674	0.627292	0.909656	1.1329	1.1329	43.1023	38.0461	0.0035056	0.0599745	1.70832	1.70832	43.1023	25.2308
ENSG00000182154	MRPL41	0.0261537	0.86817	1.60994	1.60994	46.7706	29.0511	0.804513	0.953455	1.08337	1.08337	46.7706	43.1712	0.272035	0.601996	1.27031	1.27031	46.7706	36.8184
ENSG00000040341	STAU2	0.0261601	0.86817	1.61809	1.61809	179.527	110.95	0.560486	0.884703	1.21424	1.21424	179.527	147.851	0.366328	0.689522	1.22344	1.22344	179.527	146.739
ENSG00000132664	POLR3F	0.0262632	0.86817	0.524869	-1.90524	13.1702	25.0924	0.889782	0.969644	0.938631	-1.06538	13.1702	14.0313	0.678734	0.871849	0.879082	-1.13755	13.1702	14.9818
ENSG00000180098	TRNAU1AP	0.0267742	0.873858	0.684398	-1.46114	30.7487	44.9281	0.0395744	0.441463	0.587719	-1.70149	30.7487	52.3188	0.00939645	0.109437	0.633922	-1.57748	30.7487	48.5055
ENSG00000177565	TBL1XR1	0.0270927	0.873858	1.33914	1.33914	247.781	185.029	0.0902961	0.605875	1.41396	1.41396	247.781	175.239	0.00381632	0.0631695	1.48778	1.48778	247.781	166.545
ENSG00000176915	ANKLE2	0.0271781	0.873858	0.688642	-1.45213	82.2845	119.488	0.217419	0.733853	1.38936	1.38936	82.2845	59.2248	0.000399811	0.0179946	2.02003	2.02003	82.2845	40.7342
ENSG00000187118	CMC1	0.0274568	0.873858	1.60151	1.60151	54.5043	34.0331	0.232782	0.743971	1.4801	1.4801	54.5043	36.8247	0.14016	0.443137	1.38023	1.38023	54.5043	39.4892
ENSG00000182481	KPNA2	0.0277144	0.873858	0.566059	-1.7666	80.1433	141.581	0.304256	0.77535	0.66324	-1.50775	80.1433	120.836	0.157902	0.472576	0.684252	-1.46145	80.1433	117.125
ENSG00000240344	PPIL3	0.0280771	0.873858	1.75287	1.75287	32.4761	18.5274	0.868956	0.966887	0.938996	-1.06497	32.4761	34.586	0.155388	0.468405	1.45065	1.45065	32.4761	22.3873
ENSG00000074370	ATP2A3	0.0281383	0.873858	0.45743	-2.18613	67.1024	146.695	0.270043	0.759635	0.544528	-1.83645	67.1024	123.23	0.310208	0.641736	0.686173	-1.45736	67.1024	97.7923
ENSG00000174718	RESF1	0.0281859	0.873858	1.51467	1.51467	656.998	433.757	0.016188	0.302606	2.02551	2.02551	656.998	324.361	4.10737e-05	0.00445041	2.2444	2.2444	656.998	292.728
ENSG00000127824	TUBA4A	0.028217	0.873858	0.61548	-1.62475	133.64	217.131	0.142901	0.676061	0.606215	-1.64958	133.64	220.45	0.00300205	0.0566612	0.5069	-1.97278	133.64	263.642
ENSG00000171223	JUNB	0.0282827	0.873858	0.434564	-2.30116	243.013	559.21	0.025466	0.364986	0.268783	-3.72048	243.013	904.123	0.211081	0.540776	0.610152	-1.63894	243.013	398.282
ENSG00000003393	ALS2	0.0286341	0.873858	1.77874	1.77874	40.9187	23.0043	0.206492	0.728871	1.66934	1.66934	40.9187	24.512	0.165854	0.481356	1.45071	1.45071	40.9187	28.206
ENSG00000145349	CAMK2D	0.0286543	0.873858	1.59602	1.59602	73.1084	45.8067	0.896863	0.97173	1.04307	1.04307	73.1084	70.0893	0.0274055	0.195548	1.63479	1.63479	73.1084	44.7204
ENSG00000113593	PPWD1	0.0286844	0.873858	1.42548	1.42548	102.181	71.6815	0.0197368	0.333784	1.80518	1.80518	102.181	56.6043	0.000229813	0.0133132	1.87645	1.87645	102.181	54.4542
ENSG00000117748	RPA2	0.0289655	0.873858	1.55262	1.55262	54.316	34.9834	0.240359	0.745985	0.702903	-1.42267	54.316	77.2738	0.764816	0.910814	1.06302	1.06302	54.316	51.0957
ENSG00000175105	ZNF654	0.0292333	0.873858	1.81215	1.81215	52.1862	28.798	0.858071	0.963872	1.07698	1.07698	52.1862	48.4562	0.0260189	0.189679	1.88848	1.88848	52.1862	27.634
ENSG00000124831	LRRFIP1	0.029273	0.873858	0.70278	-1.42292	515.483	733.491	0.0847648	0.596623	0.649635	-1.53933	515.483	793.496	0.170921	0.487173	0.794441	-1.25875	515.483	648.862
ENSG00000177576	C18orf32	0.0294597	0.873858	0.594255	-1.68278	30.4618	51.2606	0.3033	0.774211	1.48343	1.48343	30.4618	20.5347	0.771777	0.914364	1.07664	1.07664	30.4618	28.2934
ENSG00000144579	CTDSP1	0.0295298	0.873858	0.677093	-1.4769	125.078	184.728	0.130974	0.659276	0.658904	-1.51767	125.078	189.827	0.091031	0.360368	0.730303	-1.36929	125.078	171.268
ENSG00000134748	PRPF38A	0.0297589	0.873858	0.723061	-1.38301	181.437	250.929	0.980186	0.995465	0.994266	-1.00577	181.437	182.483	0.440312	0.739972	1.12861	1.12861	181.437	160.761
ENSG00000264247	ZNF407-AS1	0.0298999	0.873858	1.81015	1.81015	22.8138	12.6033	0.298675	0.772451	1.54255	1.54255	22.8138	14.7897	0.0471935	0.258548	1.74742	1.74742	22.8138	13.0557
ENSG00000133943	DGLUCY	0.0300482	0.873858	2.84697	2.84697	111.576	39.1912	0.334728	0.795744	2.05199	2.05199	111.576	54.3746	0.0248539	0.183844	3.08106	3.08106	111.576	36.2135
ENSG00000004142	POLDIP2	0.0300811	0.873858	0.674653	-1.48224	23.9437	35.4904	0.034505	0.417126	0.562445	-1.77795	23.9437	42.5707	0.832018	0.944603	1.04511	1.04511	23.9437	22.9103
ENSG00000119906	SLF2	0.0301904	0.873858	1.49416	1.49416	88.4864	59.2216	0.0349162	0.41778	1.84017	1.84017	88.4864	48.0861	0.00853894	0.103226	1.65855	1.65855	88.4864	53.3516
ENSG00000213625	LEPROT	0.0302051	0.873858	1.66367	1.66367	58.9901	35.4578	0.642617	0.914046	1.18088	1.18088	58.9901	49.9542	0.13268	0.433313	1.43768	1.43768	58.9901	41.0314
ENSG00000163608	NEPRO	0.0303209	0.873858	1.34626	1.34626	92.9408	69.0363	0.306831	0.778391	1.24001	1.24001	92.9408	74.9516	0.352668	0.680343	1.13878	1.13878	92.9408	81.6144
ENSG00000108883	EFTUD2	0.0304241	0.873858	1.61547	1.61547	44.5306	27.5652	0.762032	0.94303	1.10684	1.10684	44.5306	40.232	0.0248894	0.183874	1.68262	1.68262	44.5306	26.4651
ENSG00000235552	RPL6P27	0.0305978	0.873858	0.707789	-1.41285	1336.22	1887.87	0.00103597	0.0993677	0.444263	-2.25092	1336.22	3007.72	0.00579526	0.0799718	0.632738	-1.58043	1336.22	2111.8
ENSG00000163755	HPS3	0.0306171	0.873858	2.04876	2.04876	43.2838	21.1268	0.146196	0.679713	2.11117	2.11117	43.2838	20.5023	0.0384799	0.23523	2.03334	2.03334	43.2838	21.287
ENSG00000101972	STAG2	0.0312574	0.88306	1.26556	1.26556	449.287	355.01	0.0478905	0.483738	1.39814	1.39814	449.287	321.346	0.0269316	0.194581	1.28477	1.28477	449.287	349.704
ENSG00000065183	WDR3	0.0315304	0.88306	1.62338	1.62338	80.5489	49.6181	0.123137	0.64791	1.713	1.713	80.5489	47.022	0.00841728	0.102419	1.85626	1.85626	80.5489	43.3931
ENSG00000148154	UGCG	0.0315333	0.88306	1.52831	1.52831	264.176	172.855	0.870045	0.966887	0.951519	-1.05095	264.176	277.636	0.189406	0.511877	1.30737	1.30737	264.176	202.066
ENSG00000062650	WAPL	0.0316932	0.88306	1.4146	1.4146	202.559	143.191	0.706531	0.933626	1.098	1.098	202.559	184.48	0.00347338	0.0598833	1.63767	1.63767	202.559	123.687
ENSG00000137075	RNF38	0.0316962	0.88306	0.676775	-1.4776	66.3819	98.0857	0.300261	0.774027	0.748104	-1.33671	66.3819	88.7336	0.233978	0.56222	0.798307	-1.25265	66.3819	83.1534
ENSG00000135074	ADAM19	0.0318972	0.88306	0.566393	-1.76556	32.5649	57.4953	0.311647	0.783848	0.661363	-1.51203	32.5649	49.2392	0.902967	0.973155	0.966044	-1.03515	32.5649	33.7096
ENSG00000113595	TRIM23	0.031996	0.88306	1.47004	1.47004	52.1952	35.5059	0.327519	0.79156	1.30887	1.30887	52.1952	39.8781	0.00146021	0.0365116	1.84779	1.84779	52.1952	28.2473
ENSG00000136478	TEX2	0.032594	0.892557	0.54218	-1.84441	10.6727	19.6848	0.847095	0.963367	0.916547	-1.09105	10.6727	11.6445	0.415141	0.726797	0.780775	-1.28078	10.6727	13.6694
ENSG00000114126	TFDP2	0.0326452	0.892557	0.662109	-1.51032	69.4323	104.865	0.570297	0.888653	0.843982	-1.18486	69.4323	82.2676	0.00892009	0.105865	1.82651	1.82651	69.4323	38.0137
ENSG00000149231	CCDC82	0.0330049	0.898194	1.32575	1.32575	181.209	136.685	0.00151728	0.113815	1.93222	1.93222	181.209	93.783	5.06979e-05	0.00511437	1.75443	1.75443	181.209	103.287
ENSG00000158290	CUL4B	0.0331908	0.89907	1.36754	1.36754	183.753	134.367	0.206824	0.729058	1.33169	1.33169	183.753	137.985	0.109558	0.395383	1.27469	1.27469	183.753	144.155
ENSG00000120093	HOXB3	0.0341636	0.921159	1.91868	1.91868	65.562	34.1703	0.976848	0.994352	0.986459	-1.01373	65.562	66.462	0.0791694	0.335311	1.75182	1.75182	65.562	37.4251
ENSG00000131495	NDUFA2	0.0352338	0.942059	1.5733	1.5733	81.043	51.5115	0.00815626	0.232767	0.424948	-2.35323	81.043	190.713	0.138062	0.440459	0.723172	-1.3828	81.043	112.066
ENSG00000140987	ZSCAN32	0.0352608	0.942059	1.80317	1.80317	29.1656	16.1746	0.359428	0.807282	1.47992	1.47992	29.1656	19.7075	0.0106517	0.115414	2.13842	2.13842	29.1656	13.6389
ENSG00000078237	TIGAR	0.0359248	0.953793	1.74091	1.74091	39.8994	22.9187	0.315772	0.785451	1.50212	1.50212	39.8994	26.5621	0.111873	0.398232	1.53848	1.53848	39.8994	25.9343
ENSG00000136147	PHF11	0.0364454	0.953793	1.42906	1.42906	184.338	128.992	0.528123	0.871653	1.18033	1.18033	184.338	156.175	0.0652545	0.302299	1.38514	1.38514	184.338	133.082
ENSG00000180370	PAK2	0.0365049	0.953793	1.28091	1.28091	253.683	198.048	0.102595	0.62748	1.34846	1.34846	253.683	188.128	0.0016647	0.0392749	1.47373	1.47373	253.683	172.137
ENSG00000197013	ZNF429	0.0367304	0.953793	0.611086	-1.63643	30.8529	50.4886	0.303389	0.774211	0.688233	-1.453	30.8529	44.8291	0.167905	0.482894	0.712883	-1.40276	30.8529	43.2791
ENSG00000143702	CEP170	0.0367337	0.953793	1.49569	1.49569	63.1455	42.2182	0.128314	0.654399	1.57464	1.57464	63.1455	40.1015	0.0349336	0.222555	1.52198	1.52198	63.1455	41.4892
ENSG00000153201	RANBP2	0.03706	0.953793	1.27735	1.27735	248.282	194.374	0.0040512	0.181827	1.69331	1.69331	248.282	146.625	0.000280822	0.0145345	1.5602	1.5602	248.282	159.135
ENSG00000125534	PPDPF	0.0371677	0.953793	0.674496	-1.48259	90.0048	133.44	0.00102931	0.0993677	0.387559	-2.58025	90.0048	232.235	0.000140502	0.0105394	0.476633	-2.09805	90.0048	188.834
ENSG00000001629	ANKIB1	0.0373397	0.953793	1.46363	1.46363	112.328	76.7462	0.443944	0.834567	1.24024	1.24024	112.328	90.5695	0.161121	0.477106	1.30227	1.30227	112.328	86.2558
ENSG00000196865	NHLRC2	0.0373752	0.953793	1.63786	1.63786	64.6949	39.4996	0.0240446	0.35437	2.31784	2.31784	64.6949	27.9117	0.0516351	0.269747	1.60957	1.60957	64.6949	40.1938
ENSG00000188542	DUSP28	0.0374135	0.953793	1.81583	1.81583	20.2452	11.1493	0.20559	0.72815	0.592296	-1.68835	20.2452	34.1809	0.913501	0.976237	0.969727	-1.03122	20.2452	20.8772
ENSG00000175054	ATR	0.0374932	0.953793	1.44236	1.44236	172.085	119.308	0.00436912	0.189361	2.19397	2.19397	172.085	78.4354	0.0314579	0.21118	1.48013	1.48013	172.085	116.264
ENSG00000100815	TRIP11	0.0379795	0.953832	1.69999	1.69999	214.334	126.08	0.128509	0.654399	1.82628	1.82628	214.334	117.361	2.08759e-05	0.00290822	3.17995	3.17995	214.334	67.4016
ENSG00000006634	DBF4	0.0381704	0.953832	1.55368	1.55368	64.8365	41.731	0.360565	0.807282	1.34772	1.34772	64.8365	48.1083	4.09413e-06	0.00126078	3.49368	3.49368	64.8365	18.5582
ENSG00000095794	CREM	0.038232	0.953832	1.86639	1.86639	97.8731	52.4399	0.0114462	0.261045	3.30618	3.30618	97.8731	29.6031	0.0195377	0.16169	2.07444	2.07444	97.8731	47.1804
ENSG00000068024	HDAC4	0.0383513	0.953832	1.57047	1.57047	44.8525	28.5599	0.0464165	0.480678	1.9774	1.9774	44.8525	22.6825	0.752205	0.905081	1.07214	1.07214	44.8525	41.8345
ENSG00000103056	SMPD3	0.0385732	0.953832	0.578598	-1.72832	23.6711	40.9111	0.932208	0.982844	0.965409	-1.03583	23.6711	24.5192	0.864283	0.957287	1.04988	1.04988	23.6711	22.5466
ENSG00000119471	HSDL2	0.0386122	0.953832	1.54005	1.54005	32.9834	21.4171	0.681241	0.927046	0.880802	-1.13533	32.9834	37.4471	0.42653	0.731855	1.18246	1.18246	32.9834	27.8938
ENSG00000128203	ASPHD2	0.0386358	0.953832	2.14073	2.14073	23.7108	11.0761	0.199299	0.722415	2.07609	2.07609	23.7108	11.4209	0.0861025	0.353474	1.91005	1.91005	23.7108	12.4137
ENSG00000167863	ATP5PD	0.0389934	0.958616	0.617911	-1.61836	66.2372	107.195	0.02841	0.388875	0.456324	-2.19142	66.2372	145.154	0.428497	0.733724	0.823622	-1.21415	66.2372	80.4218
ENSG00000168310	IRF2	0.0393598	0.963574	1.75714	1.75714	102.562	58.3687	0.788437	0.950029	1.11938	1.11938	102.562	91.6234	0.173848	0.491158	1.46872	1.46872	102.562	69.831
ENSG00000125691	RPL23	0.0395383	0.963911	0.690376	-1.44849	2663.74	3858.39	7.07623e-05	0.0698561	0.330414	-3.02651	2663.74	8061.84	0.00262632	0.0519142	0.570024	-1.75431	2663.74	4673.03
ENSG00000099622	CIRBP	0.0400463	0.969887	0.63263	-1.5807	620.793	981.288	0.408056	0.829794	0.751468	-1.33073	620.793	826.107	0.130765	0.430562	0.704825	-1.41879	620.793	880.775
ENSG00000111913	RIPOR2	0.040115	0.969887	0.698827	-1.43097	1079.71	1545.03	0.29994	0.773983	0.755601	-1.32345	1079.71	1428.94	0.224322	0.552601	0.802308	-1.2464	1079.71	1345.75
ENSG00000177054	ZDHHC13	0.0402847	0.969984	1.69288	1.69288	26.5323	15.6729	0.0854353	0.597362	1.99992	1.99992	26.5323	13.2667	0.318349	0.648379	1.29473	1.29473	26.5323	20.4925
ENSG00000185722	ANKFY1	0.0411521	0.973002	1.45667	1.45667	85.7372	58.8582	0.0239341	0.354182	1.91858	1.91858	85.7372	44.6879	0.112995	0.401418	1.35024	1.35024	85.7372	63.4977
ENSG00000131871	SELENOS	0.0411793	0.973002	0.692667	-1.4437	48.2629	69.677	0.162201	0.697991	0.680402	-1.46972	48.2629	70.9329	0.000267869	0.0142224	0.51194	-1.95336	48.2629	94.2746
ENSG00000166503	HDGFL3	0.0412637	0.973002	1.92454	1.92454	24.9221	12.9496	0.175467	0.704898	1.96126	1.96126	24.9221	12.7071	0.0574161	0.283772	1.87256	1.87256	24.9221	13.3091
ENSG00000106367	AP1S1	0.0412951	0.973002	0.528455	-1.89231	8.76063	16.5778	0.411751	0.830537	0.673313	-1.48519	8.76063	13.0112	0.0375826	0.232771	0.513057	-1.9491	8.76063	17.0754
ENSG00000237945	LINC00649	0.041308	0.973002	1.63782	1.63782	102.494	62.5793	0.296747	0.770833	1.4761	1.4761	102.494	69.4356	0.00977388	0.111043	1.91978	1.91978	102.494	53.3881
ENSG00000167302	TEPSIN	0.0414079	0.973002	0.633153	-1.5794	49.6806	78.4654	0.351218	0.802906	0.724412	-1.38043	49.6806	68.5806	0.0216264	0.172078	0.587758	-1.70138	49.6806	84.5256
ENSG00000127528	KLF2	0.0415981	0.973137	0.725246	-1.37884	850.943	1173.32	0.0233965	0.349217	0.575297	-1.73823	850.943	1479.14	0.135267	0.436087	0.783066	-1.27703	850.943	1086.68
ENSG00000139826	ABHD13	0.0417463	0.973137	1.40164	1.40164	69.6488	49.6908	0.0263723	0.372724	1.7827	1.7827	69.6488	39.0692	0.000150993	0.010581	1.9609	1.9609	69.6488	35.5189
ENSG00000162959	MEMO1	0.0422665	0.978163	0.671111	-1.49007	68.4073	101.931	0.913628	0.978823	0.967433	-1.03366	68.4073	70.7101	0.146655	0.45504	1.36379	1.36379	68.4073	50.1599
ENSG00000001561	ENPP4	0.0422962	0.978163	1.88583	1.88583	33.4962	17.7621	0.297181	0.770833	1.64995	1.64995	33.4962	20.3013	0.0123711	0.126323	2.28333	2.28333	33.4962	14.6699
ENSG00000002016	RAD52	0.0428579	0.985553	0.636649	-1.57072	78.9392	123.992	0.773368	0.944726	1.10525	1.10525	78.9392	71.4223	0.64764	0.858252	0.899161	-1.11215	78.9392	87.792
ENSG00000198563	DDX39B	0.0435634	0.985553	0.694353	-1.44019	72.5244	104.449	0.116802	0.643272	0.647153	-1.54523	72.5244	112.067	0.00114287	0.0315273	0.546399	-1.83016	72.5244	132.732
ENSG00000186854	TRABD2A	0.0436244	0.985553	0.553607	-1.80633	132.332	239.035	0.328057	0.79156	0.641743	-1.55826	132.332	206.207	0.258125	0.586767	0.708626	-1.41118	132.332	186.744
ENSG00000034053	APBA2	0.0442003	0.985553	0.561006	-1.78251	80.3863	143.289	0.0695588	0.554491	2.27908	2.27908	80.3863	35.2714	0.366386	0.689522	1.31338	1.31338	80.3863	61.2059
ENSG00000155926	SLA	0.0442705	0.985553	1.61463	1.61463	131.603	81.5067	0.299931	0.773983	1.46428	1.46428	131.603	89.8757	0.258706	0.587319	1.31993	1.31993	131.603	99.7051
ENSG00000131558	EXOC4	0.0445447	0.985553	0.639664	-1.56332	90.9166	142.132	0.769188	0.944052	0.90373	-1.10652	90.9166	100.601	0.370213	0.692208	0.812744	-1.2304	90.9166	111.864
ENSG00000138674	SEC31A	0.0450151	0.985553	1.51825	1.51825	138.042	90.9217	0.775166	0.945308	1.09576	1.09576	138.042	125.978	0.29549	0.627326	1.25207	1.25207	138.042	110.251
ENSG00000133789	SWAP70	0.0452222	0.985553	1.82875	1.82875	54.5117	29.8082	0.578235	0.891142	1.29281	1.29281	54.5117	42.1653	0.0890104	0.357452	1.69928	1.69928	54.5117	32.0792
ENSG00000212907	MT-ND4L	0.0454302	0.985553	0.575521	-1.73756	1079.31	1875.37	0.736548	0.936216	0.865943	-1.15481	1079.31	1246.4	0.0674994	0.307346	0.592083	-1.68895	1079.31	1822.91
ENSG00000185896	LAMP1	0.0455759	0.985553	0.688375	-1.4527	137.499	199.745	0.0677655	0.552101	0.59121	-1.69145	137.499	232.573	0.000915506	0.0276115	0.527499	-1.89574	137.499	260.663
ENSG00000213676	ATF6B	0.0456079	0.985553	0.656726	-1.52271	58.3217	88.8068	0.176725	0.705032	0.645941	-1.54813	58.3217	90.2895	0.0480675	0.261	0.65036	-1.53761	58.3217	89.6761
ENSG00000134759	ELP2	0.045647	0.985553	0.724291	-1.38066	152.17	210.095	0.617028	0.904701	1.13387	1.13387	152.17	134.204	0.267875	0.597536	0.830606	-1.20394	152.17	183.203
ENSG00000214021	TTLL3	0.0457487	0.985553	0.569874	-1.75477	25.8112	45.2928	0.77876	0.945465	0.884179	-1.13099	25.8112	29.1923	0.229188	0.558043	0.70316	-1.42215	25.8112	36.7075
ENSG00000198689	SLC9A6	0.0457845	0.985553	0.675246	-1.48094	60.4572	89.5335	0.693933	0.931483	1.12866	1.12866	60.4572	53.5653	0.298596	0.629982	1.24498	1.24498	60.4572	48.5608
ENSG00000077312	SNRPA	0.046477	0.985553	0.60798	-1.64479	15.9729	26.2721	0.0185211	0.324615	0.414475	-2.41269	15.9729	38.5377	0.0105981	0.115046	0.519837	-1.92368	15.9729	30.7268
ENSG00000164916	FOXK1	0.0465745	0.985553	0.639826	-1.56292	78.4505	122.612	0.627109	0.909656	0.844616	-1.18397	78.4505	92.883	0.255583	0.585234	0.767107	-1.3036	78.4505	102.268
ENSG00000187736	NHEJ1	0.0466972	0.985553	1.61503	1.61503	43.7046	27.0611	0.643146	0.914046	1.18523	1.18523	43.7046	36.8745	0.9672	0.989344	1.01006	1.01006	43.7046	43.2693
ENSG00000143614	GATAD2B	0.0467493	0.985553	1.39307	1.39307	177.837	127.658	0.0978469	0.620262	1.53375	1.53375	177.837	115.949	0.0223636	0.173518	1.48426	1.48426	177.837	119.815
ENSG00000124788	ATXN1	0.046807	0.985553	1.39697	1.39697	223.424	159.934	0.0253624	0.364986	1.79455	1.79455	223.424	124.501	0.00274192	0.0534847	1.68921	1.68921	223.424	132.265
ENSG00000157600	TMEM164	0.0469827	0.985553	1.48493	1.48493	31.5188	21.2257	0.314915	0.785451	1.35786	1.35786	31.5188	23.2121	0.434334	0.736328	1.16887	1.16887	31.5188	26.9653
ENSG00000152291	TGOLN2	0.0471001	0.985553	0.650409	-1.53749	797.534	1226.2	0.68205	0.927201	1.14751	1.14751	797.534	695.012	0.441688	0.740756	0.841067	-1.18897	797.534	948.241
ENSG00000137845	ADAM10	0.0474599	0.985553	0.759965	-1.31585	225.697	296.984	0.964715	0.98927	1.00955	1.00955	225.697	223.563	0.766795	0.911708	0.958146	-1.04368	225.697	235.556
ENSG00000108468	CBX1	0.0478637	0.985553	1.42949	1.42949	92.6528	64.8155	0.796959	0.952502	0.93174	-1.07326	92.6528	99.4406	0.218576	0.547365	1.25735	1.25735	92.6528	73.6888
ENSG00000198964	SGMS1	0.0479275	0.985553	1.5852	1.5852	95.8545	60.4686	0.095042	0.617193	1.82929	1.82929	95.8545	52.3998	0.0193848	0.161568	1.76053	1.76053	95.8545	54.4464
ENSG00000163029	SMC6	0.0482059	0.985553	1.6984	1.6984	169.603	99.8607	0.0777841	0.575366	2.08377	2.08377	169.603	81.3927	8.74181e-06	0.00178319	3.61225	3.61225	169.603	46.9523
ENSG00000135720	DYNC1LI2	0.0484882	0.985553	1.64284	1.64284	88.1306	53.6453	0.16791	0.701471	1.71144	1.71144	88.1306	51.4951	0.479975	0.767513	1.20037	1.20037	88.1306	73.4197
ENSG00000232176	---	0.0486933	0.985553	0.651063	-1.53595	582.451	894.615	0.679097	0.925768	0.86977	-1.14973	582.451	669.66	0.837585	0.945536	1.04751	1.04751	582.451	556.033
ENSG00000068831	RASGRP2	0.048741	0.985553	0.572164	-1.74775	205.566	359.278	0.269613	0.759565	0.616291	-1.62261	205.566	333.554	0.0158861	0.141908	0.492366	-2.03101	205.566	417.507
ENSG00000131375	CAPN7	0.0489589	0.985553	1.44544	1.44544	180.076	124.583	0.164636	0.699047	1.4955	1.4955	180.076	120.412	0.0852564	0.351293	1.39541	1.39541	180.076	129.049
ENSG00000160563	MED27	0.048978	0.985553	0.555657	-1.79967	39.082	70.3347	0.749649	0.938891	0.862519	-1.1594	39.082	45.3115	0.0464693	0.256502	0.540547	-1.84998	39.082	72.3009
ENSG00000153179	RASSF3	0.0491609	0.985553	0.585492	-1.70797	298.304	509.492	0.426148	0.831134	0.715085	-1.39843	298.304	417.158	0.217843	0.546988	0.705957	-1.41652	298.304	422.552
ENSG00000204568	MRPS18B	0.0495145	0.985553	0.632885	-1.58007	109.805	173.499	0.0965201	0.61871	0.550433	-1.81675	109.805	199.488	0.019653	0.162415	0.569644	-1.75548	109.805	192.761
ENSG00000097033	SH3GLB1	0.0495525	0.985553	1.43107	1.43107	111.936	78.2182	0.979207	0.995231	1.0073	1.0073	111.936	111.124	0.608158	0.834505	1.10076	1.10076	111.936	101.689
ENSG00000204856	FAM216A	0.0495916	0.985553	1.9244	1.9244	64.1985	33.3602	0.133067	0.659276	2.17655	2.17655	64.1985	29.4955	0.19548	0.519882	1.55995	1.55995	64.1985	41.1542
ENSG00000177613	CSTF2T	0.0499608	0.985553	1.60957	1.60957	86.0598	53.4676	0.270652	0.759877	1.51132	1.51132	86.0598	56.9432	0.74843	0.903317	1.08312	1.08312	86.0598	79.4554
ENSG00000165983	PTER	0.0499913	0.985553	1.45001	1.45001	77.9317	53.7455	0.177907	0.705032	1.48422	1.48422	77.9317	52.5067	0.0053338	0.0766782	1.74001	1.74001	77.9317	44.788
ENSG00000205356	TECPR1	0.0502947	0.985553	0.64642	-1.54698	120.877	186.994	0.963815	0.989209	0.984426	-1.01582	120.877	122.789	0.0561892	0.282125	0.643313	-1.55445	120.877	187.897
ENSG00000180776	ZDHHC20	0.050544	0.985553	1.54763	1.54763	93.5355	60.438	0.913936	0.978823	0.963766	-1.0376	93.5355	97.0521	0.687964	0.875441	1.09639	1.09639	93.5355	85.3122
ENSG00000228696	ARL17B	0.0507382	0.985553	0.567554	-1.76195	98.7381	173.971	0.540515	0.878577	0.759712	-1.31629	98.7381	129.968	0.322126	0.65194	0.741976	-1.34775	98.7381	133.074
ENSG00000084733	RAB10	0.0508557	0.985553	1.3364	1.3364	146.636	109.725	0.710248	0.934449	1.0883	1.0883	146.636	134.739	0.0588483	0.28854	1.33746	1.33746	146.636	109.638
ENSG00000120280	TASL	0.0509771	0.985553	2.30022	2.30022	26.1397	11.364	0.436205	0.833814	1.66313	1.66313	26.1397	15.7171	0.668081	0.865641	1.20393	1.20393	26.1397	21.712
ENSG00000136758	YME1L1	0.0512191	0.985553	1.38967	1.38967	174.618	125.654	0.880459	0.96808	1.03976	1.03976	174.618	167.94	0.29879	0.629982	1.19839	1.19839	174.618	145.711
ENSG00000099817	POLR2E	0.0516236	0.985553	0.729271	-1.37123	41.3529	56.7044	0.16842	0.702869	0.711191	-1.40609	41.3529	58.1459	0.024304	0.182585	0.687298	-1.45497	41.3529	60.1673
ENSG00000129055	ANAPC13	0.0518453	0.985553	1.66921	1.66921	62.8854	37.6737	0.870894	0.966887	0.936845	-1.06741	62.8854	67.1247	0.149403	0.458876	1.48147	1.48147	62.8854	42.448
ENSG00000118596	SLC16A7	0.0519318	0.985553	1.41412	1.41412	177.222	125.323	0.0319079	0.406903	1.81344	1.81344	177.222	97.727	0.00225917	0.0470405	1.76415	1.76415	177.222	100.457
ENSG00000175220	ARHGAP1	0.0519684	0.985553	0.653207	-1.53091	47.1484	72.1799	0.0490546	0.48854	0.517186	-1.93354	47.1484	91.1634	0.00416245	0.0664224	0.524116	-1.90797	47.1484	89.958
ENSG00000128656	CHN1	0.0519808	0.985553	2.06979	2.06979	15.2156	7.35129	0.0958774	0.61871	2.69252	2.69252	15.2156	5.65106	0.373393	0.694698	1.39792	1.39792	15.2156	10.8845
ENSG00000243859	RPL5P17	0.0520111	0.985553	0.592576	-1.68755	92.4584	156.028	0.00493936	0.200321	0.311919	-3.20596	92.4584	296.418	0.000631356	0.0221242	0.386004	-2.59065	92.4584	239.527
ENSG00000103591	AAGAB	0.0520962	0.985553	0.61368	-1.62951	43.1626	70.334	0.426293	0.831134	0.73419	-1.36204	43.1626	58.7893	0.0353045	0.22346	0.578815	-1.72767	43.1626	74.5705
ENSG00000174444	RPL4	0.0521214	0.985553	0.669794	-1.493	713.307	1064.96	0.000679632	0.0993677	0.338068	-2.95799	713.307	2109.95	0.000415485	0.0182058	0.469695	-2.12904	713.307	1518.66
ENSG00000070269	TMEM260	0.052226	0.985553	1.63928	1.63928	75.299	45.9342	0.387986	0.822302	1.40285	1.40285	75.299	53.6758	0.0703215	0.312291	1.61137	1.61137	75.299	46.7299
ENSG00000122406	RPL5	0.0522559	0.985553	0.674519	-1.48254	2065.35	3061.96	0.00189446	0.124544	0.376926	-2.65304	2065.35	5479.45	0.00341062	0.0593915	0.53981	-1.8525	2065.35	3826.06
ENSG00000164305	CASP3	0.0523292	0.985553	1.60752	1.60752	35.3308	21.9785	0.0843577	0.594671	1.93741	1.93741	35.3308	18.2361	0.00197931	0.0428924	2.25854	2.25854	35.3308	15.6432
ENSG00000072210	ALDH3A2	0.0525415	0.985553	1.57332	1.57332	56.4423	35.8747	0.28241	0.760636	1.47289	1.47289	56.4423	38.3208	0.00114772	0.0315273	2.27264	2.27264	56.4423	24.8355
ENSG00000197381	ADARB1	0.0525892	0.985553	1.49674	1.49674	28.8211	19.2559	0.392664	0.823825	1.31114	1.31114	28.8211	21.9817	0.000158578	0.0107889	2.87191	2.87191	28.8211	10.0355
ENSG00000240065	PSMB9	0.0527247	0.985553	1.36665	1.36665	178.934	130.929	0.521213	0.868024	0.853602	-1.17151	178.934	209.623	0.959881	0.988472	1.00837	1.00837	178.934	177.448
ENSG00000220749	RPL21P28	0.0528743	0.985553	0.466409	-2.14404	24.3455	52.1978	0.0314286	0.405935	0.272497	-3.66976	24.3455	89.3422	0.111002	0.397671	2.69446	2.69446	24.3455	9.03539
ENSG00000183161	FANCF	0.0530492	0.985553	1.68943	1.68943	24.0411	14.2303	0.728259	0.935277	1.15215	1.15215	24.0411	20.8663	0.690907	0.876328	0.898705	-1.11271	24.0411	26.7508
ENSG00000196954	CASP4	0.0536773	0.985553	1.45594	1.45594	117.224	80.5138	0.382204	0.818798	1.29976	1.29976	117.224	90.1884	0.166192	0.481857	1.32066	1.32066	117.224	88.7615
ENSG00000036054	TBC1D23	0.0544242	0.985553	1.56711	1.56711	38.9364	24.846	0.153894	0.689222	1.67665	1.67665	38.9364	23.2228	0.11173	0.398232	1.46358	1.46358	38.9364	26.6036
ENSG00000023516	AKAP11	0.0551956	0.985553	1.43616	1.43616	166.909	116.219	0.0472539	0.483738	1.79027	1.79027	166.909	93.2311	0.00216791	0.0457921	1.82986	1.82986	166.909	91.2142
ENSG00000147274	RBMX	0.0552767	0.985553	1.31773	1.31773	626.977	475.799	0.136532	0.665706	1.3936	1.3936	626.977	449.896	0.000420061	0.0182058	1.69702	1.69702	626.977	369.458
ENSG00000178163	ZNF518B	0.0554948	0.985553	1.5694	1.5694	65.4246	41.6875	0.460269	0.842947	1.30591	1.30591	65.4246	50.0987	0.226121	0.555086	1.34011	1.34011	65.4246	48.8202
ENSG00000164300	SERINC5	0.0557358	0.985553	0.689959	-1.44936	146.093	211.742	0.826575	0.959937	1.06826	1.06826	146.093	136.757	0.453457	0.747289	0.859707	-1.16319	146.093	169.933
ENSG00000158805	ZNF276	0.0557444	0.985553	0.676257	-1.47873	65.1483	96.3366	0.454017	0.837982	0.78935	-1.26687	65.1483	82.5341	0.434446	0.736328	0.846437	-1.18142	65.1483	76.9677
ENSG00000105750	ZNF85	0.0559651	0.985553	2.0471	2.0471	8.1889	4.00025	0.655133	0.915877	1.27766	1.27766	8.1889	6.40928	0.182344	0.499985	1.64913	1.64913	8.1889	4.9656
ENSG00000125875	TBC1D20	0.0560529	0.985553	1.54857	1.54857	46.971	30.3318	0.745578	0.938347	1.11956	1.11956	46.971	41.9547	0.802848	0.928706	1.05962	1.05962	46.971	44.3283
ENSG00000100221	JOSD1	0.0563301	0.985553	1.39548	1.39548	57.4966	41.202	0.577277	0.891142	0.864165	-1.15719	57.4966	66.5343	0.09434	0.366766	1.35522	1.35522	57.4966	42.4261
ENSG00000167895	TMC8	0.0564081	0.985553	0.57143	-1.75	109.617	191.83	0.174708	0.704898	0.540492	-1.85017	109.617	202.81	0.107536	0.392022	0.612628	-1.63231	109.617	178.929
ENSG00000205659	LIN52	0.0564655	0.985553	0.660181	-1.51474	34.9711	52.972	0.735748	0.936216	0.892187	-1.12084	34.9711	39.1971	0.417423	0.727105	0.831603	-1.2025	34.9711	42.0527
ENSG00000287263	---	0.0566808	0.985553	0.680842	-1.46877	58.2887	85.6127	0.567274	0.888443	1.19833	1.19833	58.2887	48.6414	0.157489	0.472166	0.744145	-1.34382	58.2887	78.3297
ENSG00000174953	DHX36	0.0567555	0.985553	0.610861	-1.63703	394.219	645.351	0.890436	0.969756	1.05681	1.05681	394.219	373.029	0.358693	0.684288	0.781468	-1.27964	394.219	504.46
ENSG00000090857	PDPR	0.0568917	0.985553	0.551652	-1.81274	154.901	280.795	0.236149	0.745985	1.78021	1.78021	154.901	87.0125	0.310598	0.641736	0.719563	-1.38973	154.901	215.271
ENSG00000257621	PSMA3-AS1	0.0571597	0.985553	0.733405	-1.3635	442.618	603.512	0.827235	0.960157	1.05672	1.05672	442.618	418.862	0.711396	0.885047	1.06479	1.06479	442.618	415.685
ENSG00000214485	RPL7P1	0.0574339	0.985553	0.607226	-1.64683	408.601	672.898	0.00301173	0.160197	0.299799	-3.33556	408.601	1362.92	0.00552188	0.0779861	0.469573	-2.12959	408.601	870.154
ENSG00000240509	RPL34P18	0.0575556	0.985553	0.574808	-1.73971	563.307	979.991	0.270436	0.759635	0.607971	-1.64482	563.307	926.536	0.258829	0.587319	0.710435	-1.40759	563.307	792.904
ENSG00000124198	ARFGEF2	0.0577099	0.985553	1.50044	1.50044	75.8901	50.5786	0.12066	0.646623	1.67376	1.67376	75.8901	45.3411	0.00250181	0.0504761	1.97677	1.97677	75.8901	38.391
ENSG00000213339	QTRT1	0.0578332	0.985553	0.59053	-1.6934	19.1373	32.407	0.21985	0.73579	0.593558	-1.68475	19.1373	32.2416	0.0704385	0.312461	0.595049	-1.68053	19.1373	32.1609
ENSG00000114021	NIT2	0.0579226	0.985553	1.47028	1.47028	56.2736	38.2742	0.215065	0.733853	1.47578	1.47578	56.2736	38.1315	0.961963	0.988472	0.990224	-1.00987	56.2736	56.8292
ENSG00000117899	MESD	0.0581079	0.985553	1.3708	1.3708	129.573	94.5236	0.93292	0.982844	0.978797	-1.02166	129.573	132.379	0.863282	0.957287	1.02982	1.02982	129.573	125.821
ENSG00000160613	PCSK7	0.0583402	0.985553	0.624669	-1.60085	343.727	550.254	0.694791	0.931483	1.16333	1.16333	343.727	295.469	0.344098	0.672203	0.783346	-1.27658	343.727	438.793
ENSG00000266028	SRGAP2	0.0584115	0.985553	1.67144	1.67144	66.0997	39.5467	0.0259366	0.369234	2.58742	2.58742	66.0997	25.5465	0.00144206	0.0362125	2.49154	2.49154	66.0997	26.5297
ENSG00000154265	ABCA5	0.058441	0.985553	1.53997	1.53997	111.068	72.1237	0.112614	0.636173	1.75378	1.75378	111.068	63.3308	0.0435077	0.247878	1.61184	1.61184	111.068	68.9077
ENSG00000111224	PARP11	0.0584683	0.985553	1.47816	1.47816	70.7734	47.8794	0.82146	0.958436	1.07373	1.07373	70.7734	65.9137	0.413677	0.726797	1.18881	1.18881	70.7734	59.5329
ENSG00000143322	ABL2	0.0586243	0.985553	0.747826	-1.33721	81.1208	108.476	0.353539	0.804633	1.25124	1.25124	81.1208	64.8324	0.958453	0.988472	1.00842	1.00842	81.1208	80.4436
ENSG00000106460	TMEM106B	0.0587145	0.985553	1.36556	1.36556	100.482	73.583	0.810292	0.95541	1.06234	1.06234	100.482	94.5858	0.105276	0.387673	1.31796	1.31796	100.482	76.2407
ENSG00000136802	LRRC8A	0.0587335	0.985553	1.58547	1.58547	43.3399	27.3357	0.425807	0.831134	1.34658	1.34658	43.3399	32.1852	0.316042	0.645882	1.28336	1.28336	43.3399	33.7706
ENSG00000120915	EPHX2	0.0588038	0.985553	0.67961	-1.47143	74.4844	109.599	0.191024	0.716461	1.52446	1.52446	74.4844	48.8596	0.893872	0.970168	1.02895	1.02895	74.4844	72.3888
ENSG00000138032	PPM1B	0.0588305	0.985553	0.709849	-1.40875	144.495	203.557	0.380355	0.817243	0.781992	-1.27879	144.495	184.778	0.0582673	0.286489	0.70064	-1.42727	144.495	206.232
ENSG00000155034	FBXL18	0.0589583	0.985553	0.44951	-2.22464	27.3375	60.8161	0.386603	0.82076	1.78468	1.78468	27.3375	15.3179	0.874507	0.962336	0.932331	-1.07258	27.3375	29.3216
ENSG00000166471	TMEM41B	0.0590886	0.985553	1.90704	1.90704	35.336	18.5292	0.0270856	0.37554	3.33804	3.33804	35.336	10.5859	0.163975	0.479967	1.63216	1.63216	35.336	21.6498
ENSG00000081237	PTPRC	0.059248	0.985553	1.33626	1.33626	2803.94	2098.35	0.0643578	0.539914	1.55332	1.55332	2803.94	1805.13	0.00505797	0.074649	1.56409	1.56409	2803.94	1792.7
ENSG00000181929	PRKAG1	0.0594536	0.985553	0.697291	-1.43412	70.7272	101.431	0.189343	0.713442	0.679673	-1.4713	70.7272	104.061	0.00909064	0.106806	0.597937	-1.67242	70.7272	118.285
ENSG00000129484	PARP2	0.0594605	0.985553	0.546424	-1.83008	19.7549	36.1531	0.594034	0.897879	1.31147	1.31147	19.7549	15.0632	0.908212	0.973961	0.96166	-1.03987	19.7549	20.5425
ENSG00000170345	FOS	0.0594657	0.985553	0.388694	-2.57272	123.623	318.047	0.0126309	0.270708	0.1445	-6.9204	123.623	855.519	0.226286	0.555135	0.531812	-1.88037	123.623	232.456
ENSG00000111371	SLC38A1	0.059671	0.985553	1.3129	1.3129	440.124	335.23	0.818148	0.957644	1.05263	1.05263	440.124	418.116	0.250218	0.578209	1.18782	1.18782	440.124	370.531
ENSG00000155115	GTF3C6	0.0598122	0.985553	1.62208	1.62208	43.6847	26.9313	0.175787	0.704954	0.594283	-1.6827	43.6847	73.5083	0.791943	0.923591	1.07157	1.07157	43.6847	40.7671
ENSG00000087266	SH3BP2	0.0601456	0.985553	0.480955	-2.07919	66.1132	137.462	0.383759	0.819481	0.591622	-1.69027	66.1132	111.749	0.365572	0.688958	0.693059	-1.44288	66.1132	95.3933
ENSG00000070010	UFD1	0.0601587	0.985553	0.710304	-1.40785	54.3901	76.573	0.297175	0.770833	0.746946	-1.33879	54.3901	72.8167	0.208463	0.538031	0.788348	-1.26847	54.3901	68.9925
ENSG00000139921	TMX1	0.0602041	0.985553	1.61585	1.61585	86.8221	53.7316	0.962212	0.988539	0.981644	-1.0187	86.8221	88.4455	0.572911	0.817742	1.15948	1.15948	86.8221	74.8799
ENSG00000134375	TIMM17A	0.0605646	0.985553	1.53502	1.53502	63.8642	41.6047	0.948024	0.985168	1.02295	1.02295	63.8642	62.4316	0.229666	0.558976	1.32634	1.32634	63.8642	48.1507
ENSG00000013306	SLC25A39	0.0609534	0.985553	0.670256	-1.49197	25.523	38.0794	0.12717	0.653841	0.609424	-1.64089	25.523	41.8805	0.0011945	0.0320596	0.494994	-2.02022	25.523	51.5622
ENSG00000117226	GBP3	0.0611355	0.985553	1.6105	1.6105	55.772	34.6301	0.324774	0.79156	1.47126	1.47126	55.772	37.9077	0.127175	0.425445	1.49191	1.49191	55.772	37.3829
ENSG00000114416	FXR1	0.0612556	0.985553	1.6002	1.6002	209.953	131.204	0.891667	0.970225	1.05418	1.05418	209.953	199.162	0.182139	0.499985	1.41519	1.41519	209.953	148.357
ENSG00000104643	MTMR9	0.0615421	0.985553	0.763533	-1.3097	105.772	138.53	0.325514	0.79156	1.24918	1.24918	105.772	84.6736	0.211423	0.540886	0.829599	-1.2054	105.772	127.498
ENSG00000112249	ASCC3	0.0617134	0.985553	1.52099	1.52099	111.649	73.4058	0.126338	0.651855	1.70274	1.70274	111.649	65.5702	0.000646806	0.0222615	2.24752	2.24752	111.649	49.6766
ENSG00000177570	SAMD12	0.0617163	0.985553	2.01156	2.01156	23.6863	11.7751	0.00778174	0.229954	5.32005	5.32005	23.6863	4.45227	0.0684477	0.309905	2.03126	2.03126	23.6863	11.6609
ENSG00000108439	PNPO	0.061737	0.985553	0.642026	-1.55757	16.1539	25.1608	0.468279	0.847468	0.767065	-1.30367	16.1539	21.0593	0.999512	0.999526	0.999841	-1.00016	16.1539	16.1564
ENSG00000101901	ALG13	0.0617376	0.985553	1.4337	1.4337	96.5894	67.3709	0.927496	0.982489	1.0272	1.0272	96.5894	94.0316	0.234883	0.563932	1.26638	1.26638	96.5894	76.2721
ENSG00000054219	LY75	0.0619292	0.985553	1.52028	1.52028	127.183	83.6579	0.637062	0.911031	1.17702	1.17702	127.183	108.055	0.186343	0.506642	1.35869	1.35869	127.183	93.607
ENSG00000182400	TRAPPC6B	0.0619907	0.985553	1.50079	1.50079	44.7319	29.8055	0.465351	0.846403	1.27491	1.27491	44.7319	35.0863	0.0946668	0.367014	1.45508	1.45508	44.7319	30.7418
ENSG00000185947	ZNF267	0.0620124	0.985553	1.47591	1.47591	58.3445	39.5311	0.272758	0.760636	1.42283	1.42283	58.3445	41.006	0.116499	0.408166	1.40083	1.40083	58.3445	41.6499
ENSG00000244313	---	0.0620635	0.985553	0.691843	-1.44541	612.241	884.941	0.00138459	0.108016	0.376724	-2.65446	612.241	1625.17	0.0392904	0.237361	0.655416	-1.52575	612.241	934.126
ENSG00000138641	HERC3	0.0625008	0.985553	1.50993	1.50993	42.9497	28.4448	0.0575794	0.517507	1.93519	1.93519	42.9497	22.1941	0.000754019	0.023977	2.24155	2.24155	42.9497	19.1607
ENSG00000227304	---	0.0629411	0.985553	0.585491	-1.70797	21.1726	36.1621	0.241652	0.746139	0.596239	-1.67718	21.1726	35.5102	0.181829	0.499985	0.670341	-1.49178	21.1726	31.5848
ENSG00000083097	DOP1A	0.0630103	0.985553	1.45439	1.45439	41.5313	28.5559	0.194906	0.7204	1.49767	1.49767	41.5313	27.7307	0.226923	0.555766	1.28155	1.28155	41.5313	32.407
ENSG00000205930	C21orf62-AS1	0.0630594	0.985553	1.84982	1.84982	39.1939	21.188	0.169634	0.703071	2.02552	2.02552	39.1939	19.35	0.128249	0.426999	1.67874	1.67874	39.1939	23.3472
ENSG00000149212	SESN3	0.0631352	0.985553	1.54485	1.54485	873.154	565.202	0.000212641	0.0698561	3.85132	3.85132	873.154	226.716	2.45632e-05	0.00299415	2.79479	2.79479	873.154	312.422
ENSG00000185900	POMK	0.0632183	0.985553	0.74433	-1.34349	123.134	165.429	0.886686	0.968284	0.965488	-1.03575	123.134	127.535	0.308832	0.641121	0.845412	-1.18286	123.134	145.65
ENSG00000213096	ZNF254	0.0634424	0.985553	0.501736	-1.99308	16.4295	32.7454	0.99873	0.999796	0.999074	-1.00093	16.4295	16.4448	0.335563	0.664877	1.5109	1.5109	16.4295	10.874
ENSG00000157259	GATAD1	0.0636416	0.985553	0.515789	-1.93878	268.366	520.302	0.453277	0.83736	1.51524	1.51524	268.366	177.112	0.944893	0.984426	1.02598	1.02598	268.366	261.569
ENSG00000254741	---	0.0637019	0.985553	0.615708	-1.62415	40.39	65.5994	0.308203	0.779797	0.663113	-1.50804	40.39	60.9097	0.901767	0.972994	0.96636	-1.03481	40.39	41.7961
ENSG00000065911	MTHFD2	0.0641452	0.985553	1.5844	1.5844	134.786	85.0705	0.29488	0.770089	1.49572	1.49572	134.786	90.1146	0.328103	0.655423	1.28532	1.28532	134.786	104.866
ENSG00000206337	HCP5	0.0642725	0.985553	1.37615	1.37615	134.003	97.3753	0.0506476	0.492982	1.69015	1.69015	134.003	79.2846	0.221598	0.549758	1.2428	1.2428	134.003	107.823
ENSG00000197265	GTF2E2	0.064364	0.985553	1.39484	1.39484	56.9652	40.8399	0.469191	0.847468	1.22039	1.22039	56.9652	46.6776	0.0181833	0.155088	1.56149	1.56149	56.9652	36.4813
ENSG00000279738	---	0.0646033	0.985553	0.648294	-1.54251	67.7651	104.528	0.710829	0.934449	0.873911	-1.14428	67.7651	77.5424	0.172383	0.489525	0.717504	-1.39372	67.7651	94.4457
ENSG00000178982	EIF3K	0.0646905	0.985553	0.704621	-1.4192	272.727	387.056	0.00835233	0.233094	0.462468	-2.16231	272.727	589.721	0.00137175	0.0349553	0.533586	-1.87411	272.727	511.122
ENSG00000121964	GTDC1	0.0648044	0.985553	0.674134	-1.48339	30.2176	44.8243	0.934969	0.982844	1.02766	1.02766	30.2176	29.4042	0.926531	0.979577	0.979362	-1.02107	30.2176	30.8543
ENSG00000144381	HSPD1	0.0648405	0.985553	1.50352	1.50352	247.678	164.732	0.209695	0.729879	1.53568	1.53568	247.678	161.283	0.0006837	0.0224738	2.19435	2.19435	247.678	112.871
ENSG00000166750	SLFN5	0.0649544	0.985553	1.32213	1.32213	1109.96	839.52	0.0213982	0.345107	1.71571	1.71571	1109.96	646.938	0.000566868	0.0214233	1.71971	1.71971	1109.96	645.432
ENSG00000062716	VMP1	0.065103	0.985553	1.32836	1.32836	196.281	147.762	0.0297354	0.39729	1.68314	1.68314	196.281	116.616	0.184848	0.504687	1.2346	1.2346	196.281	158.983
ENSG00000183808	RBM12B	0.0652084	0.985553	1.63077	1.63077	112.659	69.0831	0.0309893	0.402036	2.44385	2.44385	112.659	46.099	0.03931	0.237361	1.76278	1.76278	112.659	63.9097
ENSG00000179029	TMEM107	0.0652731	0.985553	1.51346	1.51346	98.2586	64.9233	0.0899035	0.605323	0.560277	-1.78483	98.2586	175.375	0.432008	0.735005	0.834609	-1.19817	98.2586	117.73
ENSG00000213639	PPP1CB	0.0653512	0.985553	1.4594	1.4594	197.635	135.422	0.81391	0.956609	1.07724	1.07724	197.635	183.464	0.066782	0.305551	1.47763	1.47763	197.635	133.751
ENSG00000178234	GALNT11	0.0653554	0.985553	1.45026	1.45026	44.3742	30.5974	0.281055	0.760636	0.723771	-1.38165	44.3742	61.3097	0.965662	0.989344	1.00881	1.00881	44.3742	43.9864
ENSG00000158006	PAFAH2	0.0655797	0.986393	0.646539	-1.5467	27.0017	41.7634	0.529926	0.873161	1.26644	1.26644	27.0017	21.321	0.75703	0.907288	0.925858	-1.08008	27.0017	29.1639
ENSG00000104518	GSDMD	0.0662111	0.989242	0.589406	-1.69662	16.1099	27.3324	0.820312	0.958399	1.10896	1.10896	16.1099	14.527	0.454985	0.747996	0.798353	-1.25258	16.1099	20.1789
ENSG00000188177	ZC3H6	0.0664655	0.989242	0.707896	-1.41264	253.365	357.913	0.176896	0.705032	0.675125	-1.48121	253.365	375.286	0.463547	0.755842	0.866307	-1.15432	253.365	292.466
ENSG00000160201	U2AF1	0.066499	0.989242	0.710272	-1.40791	242.607	341.57	0.181573	0.710097	0.680526	-1.46945	242.607	356.5	0.04903	0.262568	0.683563	-1.46292	242.607	354.916
ENSG00000131242	RAB11FIP4	0.0665693	0.989242	0.694056	-1.44081	53.6215	77.2582	0.279475	0.760636	0.718057	-1.39265	53.6215	74.6759	0.0278831	0.196947	0.636836	-1.57026	53.6215	84.1999
ENSG00000176788	BASP1	0.0666145	0.989242	2.81822	2.81822	57.1715	20.2864	0.321694	0.79034	2.37612	2.37612	57.1715	24.0609	0.0749143	0.323486	2.83995	2.83995	57.1715	20.1312
ENSG00000143398	PIP5K1A	0.0669499	0.991232	1.64386	1.64386	127.238	77.4021	0.479524	0.851501	1.34457	1.34457	127.238	94.6311	0.825659	0.940602	0.94031	-1.06348	127.238	135.315
ENSG00000158019	BABAM2	0.0670873	0.991232	0.626565	-1.596	20.3549	32.4866	0.434533	0.833814	0.735333	-1.35993	20.3549	27.6813	0.649974	0.859065	1.13777	1.13777	20.3549	17.8902
ENSG00000120875	DUSP4	0.0679152	0.995699	0.609919	-1.63956	137.992	226.246	0.543428	0.880576	1.29176	1.29176	137.992	106.825	0.730483	0.897554	1.10225	1.10225	137.992	125.191
ENSG00000278996	---	0.0680126	0.995699	2.86522	2.86522	58.534	20.4292	0.0827874	0.591795	4.77793	4.77793	58.534	12.2509	0.0590288	0.28854	3.09519	3.09519	58.534	18.9113
ENSG00000123009	NME2P1	0.0684121	0.995699	0.512735	-1.95033	14.5383	28.3545	0.124512	0.6504	0.423037	-2.36386	14.5383	34.3666	0.0623491	0.29683	0.49329	-2.02721	14.5383	29.4722
ENSG00000179262	RAD23A	0.0684701	0.995699	2.22838	2.22838	43.3261	19.4428	0.0630421	0.539642	3.61388	3.61388	43.3261	11.9888	0.261909	0.590304	1.66312	1.66312	43.3261	26.051
ENSG00000173818	ENDOV	0.0685423	0.995699	0.583748	-1.71307	16.2777	27.8849	0.527889	0.871524	0.749425	-1.33436	16.2777	21.7203	0.0465685	0.256807	0.545891	-1.83187	16.2777	29.8186
ENSG00000225972	MTND1P23	0.0685761	0.995699	0.501653	-1.99341	1565.94	3121.55	0.472492	0.847468	1.52457	1.52457	1565.94	1027.13	0.619732	0.841507	0.822705	-1.2155	1565.94	1903.4
ENSG00000233355	CHRM3-AS2	0.0687431	0.995699	0.526463	-1.89947	86.1873	163.71	0.0751634	0.574443	0.379569	-2.63456	86.1873	227.066	0.0602855	0.292026	0.503032	-1.98795	86.1873	171.336
ENSG00000182986	ZNF320	0.0692811	0.995699	1.73825	1.73825	34.9753	20.121	0.285842	0.761943	1.65066	1.65066	34.9753	21.1887	0.00163003	0.0388184	2.93245	2.93245	34.9753	11.927
ENSG00000147324	MFHAS1	0.0694625	0.995699	0.752008	-1.32977	189.449	251.924	0.790256	0.950373	0.937367	-1.06682	189.449	202.107	0.612814	0.837164	0.920673	-1.08616	189.449	205.772
ENSG00000166822	TMEM170A	0.0694636	0.995699	1.26036	1.26036	80.9516	64.2288	0.990699	0.998503	0.997756	-1.00225	80.9516	81.1337	0.510454	0.780262	1.08913	1.08913	80.9516	74.3267
ENSG00000143669	LYST	0.069478	0.995699	1.43129	1.43129	178.422	124.658	0.983764	0.995918	1.0062	1.0062	178.422	177.322	0.525723	0.790331	1.13811	1.13811	178.422	156.771
ENSG00000163399	ATP1A1	0.0705394	0.995699	0.708967	-1.4105	138.594	195.488	0.180924	0.709983	0.675317	-1.48079	138.594	205.229	0.00181699	0.0405771	0.541883	-1.84542	138.594	255.764
ENSG00000138071	ACTR2	0.0706699	0.995699	1.37162	1.37162	702.491	512.161	0.633163	0.909656	0.879044	-1.1376	702.491	799.153	0.110198	0.396536	1.33627	1.33627	702.491	525.71
ENSG00000126351	THRA	0.0708244	0.995699	0.661312	-1.51215	52.0198	78.6615	0.931803	0.982844	0.970003	-1.03092	52.0198	53.6285	0.78529	0.921223	0.936778	-1.06749	52.0198	55.5306
ENSG00000205413	SAMD9	0.0708922	0.995699	1.54617	1.54617	196.965	127.389	0.120393	0.646623	1.78807	1.78807	196.965	110.155	0.0415205	0.243195	1.66584	1.66584	196.965	118.238
ENSG00000019582	CD74	0.0710087	0.995699	1.58867	1.58867	141.642	89.1571	0.057411	0.517507	0.474308	-2.10834	141.642	298.628	0.543526	0.800451	0.851764	-1.17403	141.642	166.292
ENSG00000115364	MRPL19	0.0713082	0.995699	1.49401	1.49401	51.5292	34.4905	0.339675	0.799014	1.38686	1.38686	51.5292	37.1552	0.0153178	0.138737	1.76346	1.76346	51.5292	29.2205
ENSG00000240849	PEDS1	0.0715285	0.995699	0.632828	-1.58021	28.309	44.7341	0.358997	0.807282	0.698701	-1.43123	28.309	40.5166	0.0574237	0.283772	0.607918	-1.64496	28.309	46.5671
ENSG00000111727	HCFC2	0.0717934	0.995699	1.43431	1.43431	65.061	45.3604	0.0421655	0.455752	1.89332	1.89332	65.061	34.3635	0.000657597	0.0223227	2.07074	2.07074	65.061	31.4191
ENSG00000158122	PRXL2C	0.0719336	0.995699	0.576459	-1.73473	30.1107	52.2339	0.594872	0.898219	1.292	1.292	30.1107	23.3055	0.994821	0.998231	1.00209	1.00209	30.1107	30.0478
ENSG00000102125	TAFAZZIN	0.0720469	0.995699	0.668076	-1.49684	28.9469	43.3288	0.510002	0.862633	1.26429	1.26429	28.9469	22.8959	0.773625	0.91485	1.07108	1.07108	28.9469	27.0259
ENSG00000197713	RPE	0.0720636	0.995699	1.76258	1.76258	32.8513	18.6382	0.342069	0.799323	1.58537	1.58537	32.8513	20.7215	0.000636093	0.0221428	3.86346	3.86346	32.8513	8.50308
ENSG00000185187	SIGIRR	0.0720707	0.995699	0.637709	-1.56811	67.2039	105.383	0.0795473	0.582457	0.509392	-1.96312	67.2039	131.93	0.0402185	0.240858	0.587881	-1.70103	67.2039	114.316
ENSG00000164896	FASTK	0.0722241	0.995699	0.665825	-1.5019	32.4307	48.7076	0.299432	0.7735	0.697237	-1.43423	32.4307	46.5132	0.00397819	0.0642749	0.513137	-1.9488	32.4307	63.2008
ENSG00000156983	BRPF1	0.0729407	0.995699	0.68282	-1.46452	32.0861	46.9906	0.96653	0.989469	1.01405	1.01405	32.0861	31.6415	0.0648494	0.300899	0.667159	-1.49889	32.0861	48.0936
ENSG00000213939	---	0.0730464	0.995699	0.5946	-1.6818	55.7344	93.7342	0.000976689	0.0993677	0.231059	-4.32789	55.7344	241.212	0.000210176	0.0127304	0.329915	-3.03108	55.7344	168.935
ENSG00000234797	RPS3AP6	0.0735026	0.995699	0.68987	-1.44955	487.208	706.232	0.000349586	0.0786702	0.31784	-3.14624	487.208	1532.87	0.00409761	0.0658524	0.539173	-1.85469	487.208	903.622
ENSG00000165219	GAPVD1	0.0740054	0.995699	1.4972	1.4972	99.054	66.1596	0.338308	0.798466	1.39639	1.39639	99.054	70.9356	0.218169	0.547153	1.33239	1.33239	99.054	74.3428
ENSG00000140471	LINS1	0.0743272	0.995699	1.31658	1.31658	62.2724	47.2985	0.064425	0.539914	1.56133	1.56133	62.2724	39.8842	0.107922	0.392252	1.28955	1.28955	62.2724	48.2902
ENSG00000128534	LSM8	0.0749797	0.995699	0.695553	-1.4377	172.267	247.67	0.214648	0.733853	0.676468	-1.47827	172.267	254.657	0.675432	0.869849	0.914858	-1.09307	172.267	188.3
ENSG00000179134	SAMD4B	0.0751286	0.995699	0.643737	-1.55343	80.6099	125.222	0.501172	0.859163	1.29691	1.29691	80.6099	62.1553	0.277038	0.60823	1.32927	1.32927	80.6099	60.6424
ENSG00000165733	BMS1	0.0754192	0.995699	1.48491	1.48491	151.381	101.947	0.0600242	0.529716	1.9162	1.9162	151.381	79.001	0.00163872	0.0388184	2.0816	2.0816	151.381	72.7235
ENSG00000159110	IFNAR2	0.0756757	0.995699	1.73716	1.73716	45.8502	26.3939	0.983034	0.995855	1.01013	1.01013	45.8502	45.3906	0.654776	0.859918	1.1527	1.1527	45.8502	39.7765
ENSG00000063854	HAGH	0.076149	0.995699	0.67545	-1.48049	40.0841	59.3443	0.939158	0.982844	1.0267	1.0267	40.0841	39.0416	0.0242374	0.182514	0.598391	-1.67115	40.0841	66.9865
ENSG00000186222	BLOC1S4	0.0761708	0.995699	0.64947	-1.53972	70.3452	108.312	0.434775	0.833814	0.74542	-1.34153	70.3452	94.3699	0.176967	0.493769	0.711093	-1.40629	70.3452	98.9254
ENSG00000126804	ZBTB1	0.0762461	0.995699	1.29654	1.29654	239.957	185.074	0.000577211	0.0965931	2.20704	2.20704	239.957	108.723	0.0164514	0.144747	1.43987	1.43987	239.957	166.652
ENSG00000185753	CXorf38	0.0762629	0.995699	0.656693	-1.52278	42.3619	64.5079	0.880744	0.96808	0.946177	-1.05688	42.3619	44.7717	0.275827	0.606943	0.764546	-1.30797	42.3619	55.4079
ENSG00000176386	CDC26	0.0763714	0.995699	0.530189	-1.88612	15.9953	30.169	0.0750977	0.574443	0.378456	-2.64232	15.9953	42.2645	0.136669	0.437206	0.574081	-1.74191	15.9953	27.8624
ENSG00000259834	---	0.0764159	0.995699	1.47849	1.47849	212.255	143.562	0.516019	0.865852	1.2478	1.2478	212.255	170.103	0.245498	0.574467	1.30377	1.30377	212.255	162.801
ENSG00000151092	NGLY1	0.0764576	0.995699	1.31795	1.31795	93.1048	70.6437	0.867519	0.966887	0.961241	-1.04032	93.1048	96.8589	0.496573	0.770472	1.11468	1.11468	93.1048	83.526
ENSG00000100722	ZC3H14	0.0765165	0.995699	1.32167	1.32167	105.876	80.1075	0.0374188	0.427828	1.66809	1.66809	105.876	63.4714	0.236179	0.564956	1.21133	1.21133	105.876	87.4046
ENSG00000078124	ACER3	0.0768934	0.995699	0.665779	-1.502	36.8531	55.3533	0.27111	0.760572	1.49675	1.49675	36.8531	24.622	0.183204	0.501368	1.39491	1.39491	36.8531	26.4197
ENSG00000023909	GCLM	0.0769202	0.995699	0.666083	-1.50131	45.0641	67.6554	0.873718	0.966887	1.05863	1.05863	45.0641	42.5681	0.385453	0.704116	1.23881	1.23881	45.0641	36.3768
ENSG00000164169	PRMT9	0.077129	0.995699	1.65512	1.65512	36.1868	21.8636	0.883864	0.96808	1.06525	1.06525	36.1868	33.9702	0.475055	0.765419	1.23074	1.23074	36.1868	29.4026
ENSG00000151883	PARP8	0.0773446	0.995699	1.35945	1.35945	110.1	80.989	0.0807493	0.586184	1.6032	1.6032	110.1	68.6753	2.49967e-06	0.00111785	2.47028	2.47028	110.1	44.5699
ENSG00000166788	SAAL1	0.0776242	0.995699	1.61964	1.61964	37.3315	23.0492	0.553992	0.88237	0.784141	-1.27528	37.3315	47.6082	0.974364	0.993044	1.00894	1.00894	37.3315	37.0008
ENSG00000108256	NUFIP2	0.0776754	0.995699	1.30537	1.30537	335.933	257.347	0.0864427	0.598551	1.49398	1.49398	335.933	224.858	0.0149971	0.137536	1.46461	1.46461	335.933	229.368
ENSG00000093144	ECHDC1	0.0777405	0.995699	1.40687	1.40687	53.2403	37.8432	0.550467	0.88237	1.19312	1.19312	53.2403	44.6229	0.000378025	0.0174761	2.16923	2.16923	53.2403	24.5434
ENSG00000154059	IMPACT	0.0777557	0.995699	1.47446	1.47446	35.7088	24.2181	0.386858	0.820927	0.753622	-1.32693	35.7088	47.3829	0.904196	0.973404	0.973719	-1.02699	35.7088	36.6726
ENSG00000178177	LCORL	0.0777983	0.995699	1.45459	1.45459	97.6908	67.1602	0.222109	0.737393	1.49385	1.49385	97.6908	65.3955	0.00073821	0.0238437	2.14564	2.14564	97.6908	45.53
ENSG00000177732	SOX12	0.0784895	0.995699	0.686922	-1.45577	40.712	59.2672	0.200019	0.722415	1.54826	1.54826	40.712	26.2952	0.660147	0.862747	0.906626	-1.10299	40.712	44.9049
ENSG00000100852	ARHGAP5	0.0784917	0.995699	1.44842	1.44842	155.434	107.313	0.522163	0.868024	1.23105	1.23105	155.434	126.262	0.0197133	0.162683	1.66825	1.66825	155.434	93.1718
ENSG00000088247	KHSRP	0.0785504	0.995699	1.49518	1.49518	151.396	101.256	0.705252	0.93337	0.875572	-1.14211	151.396	172.911	0.784791	0.921223	0.937726	-1.06641	151.396	161.45
ENSG00000132432	SEC61G	0.0786544	0.995699	0.64535	-1.54955	93.8332	145.399	0.000535634	0.0965931	0.266131	-3.75755	93.8332	352.583	0.000768903	0.0242811	0.420665	-2.37719	93.8332	223.059
ENSG00000151500	THYN1	0.0789046	0.995699	0.686899	-1.45582	34.195	49.7816	0.343171	0.799577	0.732422	-1.36533	34.195	46.6876	0.0793721	0.335311	0.679152	-1.47243	34.195	50.3496
ENSG00000141425	RPRD1A	0.079132	0.995699	1.46066	1.46066	39.308	26.9111	0.219945	0.73579	1.50597	1.50597	39.308	26.1014	0.00335928	0.0590074	1.97978	1.97978	39.308	19.8547
ENSG00000221926	TRIM16	0.0800122	0.995699	1.58281	1.58281	19.3045	12.1963	0.0625818	0.539014	2.1913	2.1913	19.3045	8.80959	0.438817	0.7395	1.22654	1.22654	19.3045	15.739
ENSG00000189159	JPT1	0.0801347	0.995699	1.47868	1.47868	67.5527	45.6843	0.308534	0.779797	0.7086	-1.41123	67.5527	95.3326	0.648816	0.858679	1.11014	1.11014	67.5527	60.8504
ENSG00000226525	RPS7P10	0.0803271	0.995699	0.531628	-1.88101	173.237	325.861	0.101298	0.624183	0.400187	-2.49883	173.237	432.89	0.0425087	0.245526	0.467474	-2.13916	173.237	370.581
ENSG00000158864	NDUFS2	0.0803947	0.995699	0.678147	-1.47461	125.291	184.754	0.713299	0.934449	0.881222	-1.13479	125.291	142.178	0.0179976	0.154405	0.580459	-1.72277	125.291	215.847
ENSG00000165591	FAAH2	0.0805406	0.995699	1.98724	1.98724	40.9141	20.5884	0.0684238	0.552101	3.08216	3.08216	40.9141	13.2745	0.34869	0.677353	1.46082	1.46082	40.9141	28.0076
ENSG00000117569	PTBP2	0.0807437	0.995699	1.58642	1.58642	59.6856	37.6228	0.246678	0.74956	1.60568	1.60568	59.6856	37.1716	0.000207477	0.0127304	3.01065	3.01065	59.6856	19.8249
ENSG00000147601	TERF1	0.080823	0.995699	1.39409	1.39409	130.041	93.28	0.27495	0.760636	1.37858	1.37858	130.041	94.3295	0.00125947	0.0328392	1.91092	1.91092	130.041	68.0517
ENSG00000111196	MAGOHB	0.0808996	0.995699	1.43675	1.43675	23.1751	16.1302	0.241561	0.746139	0.704699	-1.41904	23.1751	32.8865	0.150591	0.461054	0.749573	-1.33409	23.1751	30.9177
ENSG00000125430	HS3ST3B1	0.0810918	0.995699	1.35588	1.35588	86.0499	63.4641	0.032043	0.406903	1.79714	1.79714	86.0499	47.8817	0.199312	0.525772	1.25903	1.25903	86.0499	68.346
ENSG00000101445	PPP1R16B	0.0813867	0.995699	1.82352	1.82352	37.6522	20.6481	0.344344	0.799577	1.6532	1.6532	37.6522	22.7753	0.0428102	0.246296	2.07338	2.07338	37.6522	18.1598
ENSG00000182196	ARL6IP4	0.081648	0.995699	1.64727	1.64727	87.4806	53.1063	0.98901	0.997706	0.993958	-1.00608	87.4806	88.0124	0.842714	0.94772	1.06023	1.06023	87.4806	82.5109
ENSG00000156531	PHF6	0.0817636	0.995699	1.50652	1.50652	118.558	78.6964	0.513984	0.865167	1.26736	1.26736	118.558	93.5472	0.0690905	0.310585	1.5594	1.5594	118.558	76.0277
ENSG00000123609	NMI	0.0818576	0.995699	1.46453	1.46453	70.5211	48.1527	0.253419	0.749787	1.47261	1.47261	70.5211	47.8886	0.0041663	0.0664224	1.94426	1.94426	70.5211	36.2714
ENSG00000153339	TRAPPC8	0.0818968	0.995699	1.30106	1.30106	108.619	83.485	0.0205224	0.341127	1.73156	1.73156	108.619	62.7289	1.48324e-05	0.00234553	2.02546	2.02546	108.619	53.6268
ENSG00000090861	AARS1	0.0826253	0.995699	1.55946	1.55946	71.3912	45.7793	0.203505	0.725645	1.65593	1.65593	71.3912	43.1124	0.470078	0.761258	1.20923	1.20923	71.3912	59.0386
ENSG00000108582	CPD	0.0829189	0.995699	1.54879	1.54879	37.2645	24.0604	0.764467	0.943467	0.89239	-1.12059	37.2645	41.7581	0.000776034	0.0242811	3.1865	3.1865	37.2645	11.6945
ENSG00000163257	DCAF16	0.0831162	0.995699	0.712597	-1.40332	134.54	188.803	0.735315	0.936216	0.902675	-1.10782	134.54	149.046	0.111608	0.398184	0.724433	-1.38039	134.54	185.718
ENSG00000167515	TRAPPC2L	0.0837831	0.995699	0.651044	-1.53599	84.0827	129.151	0.0965445	0.61871	0.529729	-1.88776	84.0827	158.728	0.0679937	0.308875	0.625325	-1.59917	84.0827	134.462
ENSG00000198026	ZNF335	0.0838161	0.995699	0.666508	-1.50036	70.1665	105.275	0.631577	0.909656	0.840128	-1.19029	70.1665	83.5187	0.0573831	0.283772	0.630448	-1.58617	70.1665	111.296
ENSG00000205268	PDE7A	0.0844025	0.995699	0.776089	-1.28851	172.918	222.806	0.501503	0.859163	1.16613	1.16613	172.918	148.284	0.620395	0.841823	0.927182	-1.07854	172.918	186.498
ENSG00000262265	---	0.0845508	0.995699	0.669979	-1.49258	53.4383	79.7612	0.643387	0.914046	0.84668	-1.18108	53.4383	63.1151	0.773241	0.914726	0.932301	-1.07262	53.4383	57.3188
ENSG00000120437	ACAT2	0.084752	0.995699	1.92126	1.92126	63.6868	33.1485	0.32776	0.79156	1.77385	1.77385	63.6868	35.9032	0.0489456	0.262568	2.17353	2.17353	63.6868	29.3011
ENSG00000082258	CCNT2	0.0849114	0.995699	1.28548	1.28548	152.616	118.722	0.00935074	0.239961	1.81003	1.81003	152.616	84.3165	0.0994665	0.3784	1.28149	1.28149	152.616	119.092
ENSG00000204406	MBD5	0.0849365	0.995699	1.42671	1.42671	139.934	98.0818	0.411405	0.830537	1.29894	1.29894	139.934	107.729	0.000899949	0.027307	2.06503	2.06503	139.934	67.7638
ENSG00000120137	PANK3	0.084995	0.995699	1.35364	1.35364	133.677	98.7542	0.00903798	0.239282	2.05416	2.05416	133.677	65.0764	4.09378e-05	0.00445041	2.14986	2.14986	133.677	62.1797
ENSG00000117228	GBP1	0.0851099	0.995699	1.36963	1.36963	231.363	168.924	0.034104	0.415917	1.82569	1.82569	231.363	126.726	0.452565	0.746956	1.15236	1.15236	231.363	200.773
ENSG00000081087	OSTM1	0.0851983	0.995699	0.668912	-1.49496	100.542	150.307	0.512342	0.864469	1.26953	1.26953	100.542	79.1968	0.966193	0.989344	1.01038	1.01038	100.542	99.5091
ENSG00000114354	TFG	0.0855079	0.995699	1.37716	1.37716	140.511	102.03	0.727756	0.935277	1.10478	1.10478	140.511	127.185	0.504727	0.777557	1.13645	1.13645	140.511	123.64
ENSG00000101224	CDC25B	0.0856657	0.995699	0.743781	-1.34448	361.747	486.362	0.0155583	0.297102	0.525605	-1.90257	361.747	688.248	0.00207951	0.044406	0.577404	-1.73189	361.747	626.506
ENSG00000198315	ZKSCAN8	0.0860495	0.995699	1.60736	1.60736	41.953	26.1006	0.534797	0.876175	1.30083	1.30083	41.953	32.251	0.844508	0.94841	0.946445	-1.05659	41.953	44.3269
ENSG00000139190	VAMP1	0.0860919	0.995699	1.72482	1.72482	66.7161	38.6801	0.409775	0.830537	1.49768	1.49768	66.7161	44.5463	0.0395321	0.237987	1.97753	1.97753	66.7161	33.7372
ENSG00000112308	C6orf62	0.0861522	0.995699	1.3258	1.3258	329.533	248.554	0.304652	0.775868	1.29813	1.29813	329.533	253.852	6.01614e-06	0.00153045	2.19913	2.19913	329.533	149.847
ENSG00000134313	KIDINS220	0.0863	0.995699	1.29441	1.29441	223.129	172.379	0.181735	0.710097	1.3647	1.3647	223.129	163.5	0.00449804	0.0694407	1.56178	1.56178	223.129	142.869
ENSG00000145216	FIP1L1	0.0863627	0.995699	0.752153	-1.32952	140.625	186.963	0.519978	0.868024	0.847746	-1.1796	140.625	165.881	0.0525293	0.27151	0.716718	-1.39525	140.625	196.207
ENSG00000171606	ZNF274	0.0864383	0.995699	0.739361	-1.35252	54.1171	73.1944	0.244123	0.747219	1.38476	1.38476	54.1171	39.0805	0.18865	0.510306	1.28251	1.28251	54.1171	42.1962
ENSG00000254996	ANKHD1-EIF4EBP3	0.0865277	0.995699	1.99435	1.99435	22.769	11.4167	0.491362	0.856299	1.52839	1.52839	22.769	14.8974	0.000959913	0.0286554	7.79489	7.79489	22.769	2.92101
ENSG00000054654	SYNE2	0.086812	0.995699	1.62997	1.62997	1905.33	1168.93	0.0632347	0.539642	2.27336	2.27336	1905.33	838.113	0.0687899	0.310085	1.71421	1.71421	1905.33	1111.49
ENSG00000226259	GTF2H2B	0.0869463	0.995699	0.344169	-2.90555	42.6587	123.947	0.893117	0.970225	0.878178	-1.13872	42.6587	48.5764	0.835402	0.944608	0.873648	-1.14463	42.6587	48.8283
ENSG00000136040	PLXNC1	0.0870471	0.995699	1.53379	1.53379	30.0333	19.5811	0.58851	0.896712	1.22848	1.22848	30.0333	24.4475	0.0572973	0.283772	1.64406	1.64406	30.0333	18.2678
ENSG00000101782	RIOK3	0.0870937	0.995699	0.710969	-1.40653	98.3973	138.399	0.32048	0.789861	0.73663	-1.35753	98.3973	133.578	0.99503	0.998231	0.998698	-1.0013	98.3973	98.5256
ENSG00000155330	C16orf87	0.0872408	0.995699	1.45006	1.45006	47.2062	32.5547	0.307211	0.778391	0.717269	-1.39418	47.2062	65.8138	0.13144	0.431327	1.41013	1.41013	47.2062	33.4765
ENSG00000160410	SHKBP1	0.0875763	0.995699	0.658635	-1.51829	33.2727	50.5177	0.162189	0.697991	0.592657	-1.68732	33.2727	56.1416	0.0236538	0.18044	0.565991	-1.76681	33.2727	58.7867
ENSG00000109854	HTATIP2	0.0878568	0.995699	1.56531	1.56531	46.5495	29.7381	0.829876	0.960175	1.08983	1.08983	46.5495	42.7127	0.0515601	0.269747	1.70867	1.70867	46.5495	27.2431
ENSG00000112486	CCR6	0.08787	0.995699	1.50327	1.50327	104.35	69.4155	0.0668439	0.550436	1.97759	1.97759	104.35	52.7664	0.0361136	0.226475	1.68136	1.68136	104.35	62.0629
ENSG00000175197	DDIT3	0.088147	0.995699	0.623962	-1.60266	15.0822	24.1717	0.112037	0.636173	0.514124	-1.94506	15.0822	29.3357	0.000616699	0.0219593	0.383236	-2.60936	15.0822	39.3548
ENSG00000108518	PFN1	0.0882598	0.995699	0.651463	-1.53501	409.583	628.713	0.00518186	0.201726	0.33731	-2.96463	409.583	1214.26	0.125098	0.422244	0.669989	-1.49256	409.583	611.327
ENSG00000169155	ZBTB43	0.088391	0.995699	1.46225	1.46225	110.276	75.4155	0.42789	0.832061	1.31356	1.31356	110.276	83.9523	0.924636	0.979548	0.978565	-1.0219	110.276	112.692
ENSG00000164574	GALNT10	0.0884712	0.995699	0.701612	-1.42529	60.5113	86.2462	0.49131	0.856299	1.25167	1.25167	60.5113	48.3445	0.0651444	0.302029	1.52032	1.52032	60.5113	39.8018
ENSG00000074696	HACD3	0.0889487	0.995699	1.4633	1.4633	47.9633	32.7775	0.325034	0.79156	1.40406	1.40406	47.9633	34.1605	0.720758	0.890634	1.08475	1.08475	47.9633	44.216
ENSG00000113407	TARS1	0.089076	0.995699	1.44365	1.44365	157.873	109.357	0.166531	0.70011	1.58883	1.58883	157.873	99.3646	0.543183	0.800343	1.14511	1.14511	157.873	137.868
ENSG00000147065	MSN	0.0891456	0.995699	0.714999	-1.3986	530.237	741.591	0.0830717	0.591795	0.589129	-1.69742	530.237	900.035	0.103109	0.384261	0.716157	-1.39634	530.237	740.392
ENSG00000198561	CTNND1	0.0896153	0.995699	1.91972	1.91972	33.6666	17.5372	0.0923627	0.609261	2.7619	2.7619	33.6666	12.1896	0.0914521	0.361545	1.95533	1.95533	33.6666	17.2179
ENSG00000135047	CTSL	0.0901454	0.995699	1.8053	1.8053	34.9441	19.3564	0.0551752	0.511723	2.87832	2.87832	34.9441	12.1404	0.0571783	0.283772	1.98884	1.98884	34.9441	17.5701
ENSG00000103051	COG4	0.0901514	0.995699	0.644957	-1.55049	32.2713	50.0364	0.725195	0.935277	1.15343	1.15343	32.2713	27.9786	0.742192	0.900317	1.09458	1.09458	32.2713	29.4828
ENSG00000149313	AASDHPPT	0.0901811	0.995699	1.39341	1.39341	69.5452	49.9102	0.0685367	0.552101	1.74552	1.74552	69.5452	39.8422	0.0544254	0.277562	1.47668	1.47668	69.5452	47.0957
ENSG00000146587	RBAK	0.0904009	0.995699	1.48523	1.48523	52.8216	35.5645	0.0333863	0.412987	2.19093	2.19093	52.8216	24.1093	0.0289398	0.200624	1.69944	1.69944	52.8216	31.0819
ENSG00000211455	STK38L	0.0906318	0.995699	1.82992	1.82992	36.1866	19.775	0.363458	0.808843	1.64949	1.64949	36.1866	21.9381	0.013048	0.129617	2.57903	2.57903	36.1866	14.0311
ENSG00000280441	---	0.0906366	0.995699	2.72578	2.72578	92.2408	33.8401	0.100582	0.624183	4.55042	4.55042	92.2408	20.2708	0.0786683	0.334269	2.94904	2.94904	92.2408	31.2782
ENSG00000066557	LRRC40	0.0908335	0.995699	1.3963	1.3963	33.9012	24.2793	0.964188	0.989209	0.986805	-1.01337	33.9012	34.3545	0.00722765	0.0919325	1.80379	1.80379	33.9012	18.7944
ENSG00000138303	ASCC1	0.0909647	0.995699	1.51718	1.51718	30.3574	20.0091	0.982114	0.995785	0.991718	-1.00835	30.3574	30.6109	0.149256	0.458876	1.44551	1.44551	30.3574	21.0011
ENSG00000186834	HEXIM1	0.0912836	0.995699	1.46988	1.46988	230.806	157.024	0.451165	0.837082	1.30434	1.30434	230.806	176.953	0.937507	0.982158	1.01865	1.01865	230.806	226.58
ENSG00000113013	HSPA9	0.0913625	0.995699	0.641256	-1.55944	243.41	379.584	0.884227	0.96808	1.06124	1.06124	243.41	229.365	0.49759	0.771027	0.830749	-1.20373	243.41	293.001
ENSG00000163956	LRPAP1	0.091609	0.995699	0.684093	-1.46179	34.5812	50.5505	0.50019	0.859163	1.27095	1.27095	34.5812	27.2089	0.318681	0.648558	0.792138	-1.26241	34.5812	43.6555
ENSG00000106789	CORO2A	0.091669	0.995699	0.569841	-1.75488	112.061	196.653	0.315732	0.785451	1.68468	1.68468	112.061	66.5178	0.964267	0.989344	1.01568	1.01568	112.061	110.331
ENSG00000256594	---	0.0919713	0.995699	0.524867	-1.90524	26.5896	50.6597	0.385111	0.819674	0.598695	-1.6703	26.5896	44.4126	0.727448	0.895497	0.868945	-1.15082	26.5896	30.5999
ENSG00000104320	NBN	0.092274	0.995699	1.51573	1.51573	47.2876	31.198	0.498555	0.858713	1.29242	1.29242	47.2876	36.5884	0.266779	0.596228	1.32529	1.32529	47.2876	35.6809
ENSG00000161010	MRNIP	0.092598	0.995699	0.659671	-1.51591	63.4506	96.1852	0.511942	0.864394	0.778156	-1.28509	63.4506	81.5396	0.00321329	0.0578492	0.471466	-2.12104	63.4506	134.581
ENSG00000147044	CASK	0.0928262	0.995699	0.748801	-1.33547	163.276	218.05	0.513197	0.864837	1.19143	1.19143	163.276	137.042	0.83991	0.947246	0.964466	-1.03684	163.276	169.292
ENSG00000147894	C9orf72	0.0929015	0.995699	1.50354	1.50354	45.3243	30.145	0.0619397	0.538498	2.03859	2.03859	45.3243	22.2332	0.00169137	0.0397437	2.26606	2.26606	45.3243	20.0013
ENSG00000123908	AGO2	0.0929915	0.995699	1.36986	1.36986	202.413	147.762	0.276298	0.760636	1.37093	1.37093	202.413	147.647	0.0796689	0.335596	1.40555	1.40555	202.413	144.011
ENSG00000260563	---	0.0930596	0.995699	0.618268	-1.61742	82.8809	134.053	0.58252	0.892702	1.27794	1.27794	82.8809	64.8551	0.595205	0.8292	1.17283	1.17283	82.8809	70.6675
ENSG00000143321	HDGF	0.0932131	0.995699	1.29046	1.29046	151.504	117.403	0.453385	0.83736	1.19178	1.19178	151.504	127.124	0.472412	0.762993	1.11888	1.11888	151.504	135.407
ENSG00000108510	MED13	0.0932708	0.995699	1.26371	1.26371	206.957	163.77	0.00651681	0.212806	1.80969	1.80969	206.957	114.361	3.10004e-06	0.00111785	1.99404	1.99404	206.957	103.788
ENSG00000111728	ST8SIA1	0.0933329	0.995699	1.37662	1.37662	73.6836	53.5251	0.000139906	0.0698561	3.28309	3.28309	73.6836	22.4434	0.0148291	0.137478	1.62228	1.62228	73.6836	45.4199
ENSG00000076928	ARHGEF1	0.093413	0.995699	0.580651	-1.7222	219.269	377.626	0.740822	0.936216	1.18091	1.18091	219.269	185.679	0.367649	0.690537	0.738509	-1.35408	219.269	296.908
ENSG00000166181	API5	0.0935797	0.995699	0.676198	-1.47886	38.611	57.1001	0.126593	0.652594	0.579576	-1.7254	38.611	66.6194	0.0256249	0.187884	0.584926	-1.70962	38.611	66.01
ENSG00000134108	ARL8B	0.0937261	0.995699	1.41684	1.41684	62.1678	43.8777	0.415623	0.830537	1.29728	1.29728	62.1678	47.9218	0.0958249	0.369039	1.43093	1.43093	62.1678	43.4457
ENSG00000065357	DGKA	0.093733	0.995699	0.654076	-1.52887	440.878	674.046	0.995431	0.999702	1.00225	1.00225	440.878	439.888	0.139669	0.443137	0.678216	-1.47446	440.878	650.055
ENSG00000037637	FBXO42	0.0939575	0.995699	1.49175	1.49175	33.8908	22.7189	0.478076	0.85022	1.29582	1.29582	33.8908	26.154	0.662645	0.863647	1.11114	1.11114	33.8908	30.501
ENSG00000166477	LEO1	0.0939687	0.995699	1.47268	1.47268	55.983	38.0144	0.593925	0.897879	1.20785	1.20785	55.983	46.3491	0.334962	0.66436	1.25697	1.25697	55.983	44.5382
ENSG00000102910	LONP2	0.0940144	0.995699	0.690609	-1.448	121.059	175.293	0.999028	0.999796	1.00042	1.00042	121.059	121.008	0.201024	0.527701	0.745899	-1.34066	121.059	162.299
ENSG00000169019	COMMD8	0.0943326	0.995699	0.651927	-1.53391	26.138	40.0934	0.226195	0.739121	0.622553	-1.60629	26.138	41.9851	0.975954	0.993961	1.00835	1.00835	26.138	25.9215
ENSG00000102908	NFAT5	0.0945249	0.995699	1.65005	1.65005	125.944	76.3271	0.0233671	0.349217	2.89106	2.89106	125.944	43.5632	0.000491758	0.0201023	3.00603	3.00603	125.944	41.897
ENSG00000139350	NEDD1	0.0946336	0.995699	1.38129	1.38129	162.719	117.803	0.457245	0.839717	1.24824	1.24824	162.719	130.359	0.322857	0.652017	1.21817	1.21817	162.719	133.577
ENSG00000204681	GABBR1	0.0947812	0.995699	0.661703	-1.51125	58.809	88.8753	0.52561	0.870337	0.78461	-1.27452	58.809	74.9532	0.447104	0.743969	0.82227	-1.21615	58.809	71.5203
ENSG00000163867	ZMYM6	0.0947905	0.995699	1.3897	1.3897	53.4856	38.4873	0.0308101	0.402036	1.95849	1.95849	53.4856	27.3097	0.0563739	0.282642	1.47495	1.47495	53.4856	36.2626
ENSG00000163935	SFMBT1	0.0949826	0.995699	1.82003	1.82003	115.408	63.4098	0.091646	0.608336	2.56253	2.56253	115.408	45.0367	0.165154	0.481356	1.67463	1.67463	115.408	68.9156
ENSG00000132475	H3-3B	0.0949837	0.995699	0.741477	-1.34866	2214.89	2987.13	0.011883	0.264358	0.497699	-2.00925	2214.89	4450.26	0.0947634	0.367014	0.732915	-1.36442	2214.89	3022.02
ENSG00000100129	EIF3L	0.0950117	0.995699	0.721043	-1.38688	591.273	820.024	0.0810273	0.587473	0.589311	-1.6969	591.273	1003.33	0.0193543	0.161568	0.621742	-1.60838	591.273	950.994
ENSG00000189339	SLC35E2B	0.0950619	0.995699	0.711238	-1.406	191.375	269.073	0.20218	0.72456	1.50075	1.50075	191.375	127.519	0.48332	0.768221	1.161	1.161	191.375	164.836
ENSG00000048052	HDAC9	0.0952453	0.995699	1.57147	1.57147	32.4593	20.6553	0.95258	0.986529	1.02468	1.02468	32.4593	31.6776	0.447665	0.743969	1.23339	1.23339	32.4593	26.3172
ENSG00000162496	DHRS3	0.0952671	0.995699	0.664138	-1.50571	25.6748	38.6588	0.38232	0.818798	0.719283	-1.39027	25.6748	35.6949	0.109499	0.395383	0.666701	-1.49992	25.6748	38.5101
ENSG00000226752	CUTALP	0.0956107	0.995699	0.673927	-1.48384	130.863	194.18	0.483279	0.854501	1.29496	1.29496	130.863	101.056	0.256927	0.585834	0.756827	-1.32131	130.863	172.91
ENSG00000089248	ERP29	0.0956694	0.995699	0.76726	-1.30334	383.463	499.783	0.00497523	0.200321	0.502134	-1.9915	383.463	763.667	7.6353e-06	0.00174367	0.478996	-2.0877	383.463	800.556
ENSG00000198755	RPL10A	0.0958052	0.995699	0.692542	-1.44396	2146.25	3099.09	0.00536946	0.202882	0.386375	-2.58816	2146.25	5554.83	0.00433946	0.0677072	0.520452	-1.92141	2146.25	4123.81
ENSG00000102390	PBDC1	0.0962911	0.995699	0.70809	-1.41225	80.1708	113.221	0.585746	0.894611	0.839493	-1.19119	80.1708	95.499	0.852138	0.952045	1.0415	1.0415	80.1708	76.9762
ENSG00000148908	RGS10	0.0962912	0.995699	0.684514	-1.46089	75.4777	110.265	0.0307402	0.402036	0.469734	-2.12887	75.4777	160.682	0.220153	0.548622	0.747516	-1.33776	75.4777	100.971
ENSG00000073578	SDHA	0.0963024	0.995699	1.36559	1.36559	91.6754	67.1327	0.996404	0.999796	1.00129	1.00129	91.6754	91.5572	0.606377	0.833664	1.10415	1.10415	91.6754	83.0284
ENSG00000138190	EXOC6	0.0965415	0.995699	1.43114	1.43114	63.058	44.0614	0.21486	0.733853	1.51324	1.51324	63.058	41.6708	0.0336594	0.218581	1.61149	1.61149	63.058	39.1304
ENSG00000167232	ZNF91	0.0966311	0.995699	0.64084	-1.56045	147.577	230.287	0.73014	0.935277	1.15429	1.15429	147.577	127.85	0.122508	0.418689	1.54764	1.54764	147.577	95.3558
ENSG00000198783	ZNF830	0.0966688	0.995699	1.49133	1.49133	98.6111	66.1229	0.456893	0.839598	1.31795	1.31795	98.6111	74.8215	0.127699	0.426465	1.46155	1.46155	98.6111	67.4704
ENSG00000163946	TASOR	0.0970102	0.995699	1.21811	1.21811	296.099	243.08	0.016634	0.308219	1.55736	1.55736	296.099	190.129	1.09815e-07	0.000160632	1.95823	1.95823	296.099	151.207
ENSG00000163479	SSR2	0.0973479	0.995699	0.747583	-1.33764	135.292	180.973	0.00541888	0.202882	0.473119	-2.11363	135.292	285.959	0.00107664	0.0305798	0.553268	-1.80744	135.292	244.533
ENSG00000134283	PPHLN1	0.0974212	0.995699	0.760427	-1.31505	212.718	279.735	0.200582	0.722967	0.721476	-1.38605	212.718	294.837	0.218923	0.547365	0.809907	-1.23471	212.718	262.645
ENSG00000082996	RNF13	0.0978502	0.995699	1.3307	1.3307	49.7784	37.4076	0.927424	0.982489	1.02406	1.02406	49.7784	48.6089	0.977835	0.994528	1.00485	1.00485	49.7784	49.5383
ENSG00000131876	SNRPA1	0.0981485	0.995699	0.726393	-1.37667	143.365	197.366	0.336685	0.796832	0.750631	-1.33221	143.365	190.993	0.172716	0.489851	0.760833	-1.31435	143.365	188.432
ENSG00000143751	SDE2	0.0981808	0.995699	0.694969	-1.43891	35.034	50.4109	0.552461	0.88237	0.817223	-1.22366	35.034	42.8696	0.870914	0.960497	0.96292	-1.03851	35.034	36.3831
ENSG00000055130	CUL1	0.0982025	0.995699	1.32637	1.32637	72.8735	54.9419	0.287364	0.763647	1.32348	1.32348	72.8735	55.062	0.706234	0.883539	1.06783	1.06783	72.8735	68.2442
ENSG00000023892	DEF6	0.0985262	0.995699	0.712873	-1.40277	55.6233	78.0269	0.488181	0.85561	0.803175	-1.24506	55.6233	69.2543	0.0747109	0.323324	0.685904	-1.45793	55.6233	81.0949
ENSG00000166619	BLCAP	0.0986991	0.995699	0.764451	-1.30813	50.2204	65.6948	0.26947	0.759565	0.759553	-1.31656	50.2204	66.1185	0.00485428	0.0722707	0.626486	-1.5962	50.2204	80.1621
ENSG00000166452	AKIP1	0.0987605	0.995699	1.47976	1.47976	35.3065	23.8597	0.779464	0.945465	0.904902	-1.10509	35.3065	39.0169	0.159784	0.475932	1.41423	1.41423	35.3065	24.9652
ENSG00000203865	ATP1A1-AS1	0.0989562	0.995699	1.8889	1.8889	56.9349	30.1419	0.308437	0.779797	1.83578	1.83578	56.9349	31.014	0.460691	0.753355	1.34021	1.34021	56.9349	42.482
ENSG00000104671	DCTN6	0.0989894	0.995699	0.642155	-1.55726	40.5184	63.0975	0.848022	0.963367	1.0836	1.0836	40.5184	37.3923	0.541938	0.799315	1.1904	1.1904	40.5184	34.0377
ENSG00000167461	RAB8A	0.0992729	0.995699	1.53088	1.53088	43.3937	28.3456	0.120767	0.646623	0.548677	-1.82256	43.3937	79.0879	0.652777	0.859757	1.12691	1.12691	43.3937	38.5068
ENSG00000163655	GMPS	0.099536	0.995699	0.744572	-1.34305	62.8758	84.4455	0.73137	0.935277	0.909225	-1.09984	62.8758	69.1532	0.707941	0.883539	0.932288	-1.07263	62.8758	67.4425
ENSG00000165704	HPRT1	0.09962	0.995699	1.5252	1.5252	46.8676	30.7288	0.288298	0.764161	0.663676	-1.50676	46.8676	70.6181	0.635271	0.851569	1.13284	1.13284	46.8676	41.3718
ENSG00000135679	MDM2	0.0998715	0.995699	1.34548	1.34548	118.522	88.0891	0.726897	0.935277	1.1016	1.1016	118.522	107.591	0.638762	0.853286	1.09092	1.09092	118.522	108.644
ENSG00000167258	CDK12	0.0999016	0.995699	1.42201	1.42201	196.537	138.21	0.0622619	0.539014	1.85895	1.85895	196.537	105.725	0.0520455	0.271041	1.53921	1.53921	196.537	127.687
ENSG00000153487	ING1	0.100059	0.995699	1.60398	1.60398	59.3755	37.0175	0.491221	0.856299	1.35595	1.35595	59.3755	43.7888	0.00066766	0.0223227	3.00153	3.00153	59.3755	19.7817
ENSG00000163607	GTPBP8	0.100107	0.995699	0.579343	-1.72609	56.2558	97.1028	0.866002	0.966611	0.916739	-1.09082	56.2558	61.3651	0.66314	0.863647	0.860089	-1.16267	56.2558	65.407
ENSG00000128694	OSGEPL1	0.10021	0.995699	0.685806	-1.45814	38.2035	55.706	0.426576	0.831134	0.754959	-1.32458	38.2035	50.6035	0.14596	0.454237	0.708089	-1.41225	38.2035	53.9531
ENSG00000172428	COPS9	0.100445	0.995699	1.56102	1.56102	68.318	43.7649	0.0768311	0.575136	0.483134	-2.06982	68.318	141.406	0.776881	0.917271	0.924223	-1.08199	68.318	73.9194
ENSG00000119487	MAPKAP1	0.100463	0.995699	1.42371	1.42371	44.0208	30.9197	0.383502	0.819481	1.33388	1.33388	44.0208	33.0021	0.800081	0.927933	1.05677	1.05677	44.0208	41.6561
ENSG00000120899	PTK2B	0.1007	0.995699	0.703361	-1.42174	116.123	165.097	0.326698	0.79156	0.722717	-1.38367	116.123	160.676	0.115084	0.406369	0.704618	-1.41921	116.123	164.803
ENSG00000149196	HIKESHI	0.100855	0.995699	0.614209	-1.62811	21.61	35.1835	0.12877	0.655158	0.502135	-1.9915	21.61	43.0364	0.278112	0.609223	0.714056	-1.40045	21.61	30.2638
ENSG00000215467	RPL27AP	0.101032	0.995699	0.591871	-1.68956	154.048	260.274	0.120631	0.646623	0.464163	-2.15442	154.048	331.884	0.0337651	0.218782	0.49456	-2.022	154.048	311.486
ENSG00000198034	RPS4X	0.102531	0.995699	0.742822	-1.34622	1025.73	1380.85	0.00447857	0.19016	0.448987	-2.22724	1025.73	2284.54	0.00660244	0.0866164	0.598587	-1.6706	1025.73	1713.58
ENSG00000234851	RPL23AP42	0.102565	0.995699	0.70584	-1.41675	308.894	437.626	0.0153655	0.294924	0.449838	-2.22302	308.894	686.678	0.420131	0.728044	0.836104	-1.19602	308.894	369.444
ENSG00000100023	PPIL2	0.102903	0.995699	0.681059	-1.4683	69.9122	102.652	0.564157	0.887187	1.2363	1.2363	69.9122	56.5497	0.989094	0.997276	0.996643	-1.00337	69.9122	70.1477
ENSG00000132478	UNK	0.103156	0.995699	1.52128	1.52128	21.9377	14.4206	0.897181	0.97173	1.05113	1.05113	21.9377	20.8707	0.820628	0.939076	1.06006	1.06006	21.9377	20.6949
ENSG00000184787	UBE2G2	0.103171	0.995699	0.769472	-1.29959	214.867	279.239	0.636558	0.911031	0.889077	-1.12476	214.867	241.674	0.394179	0.713493	0.867392	-1.15288	214.867	247.716
ENSG00000135956	TMEM127	0.103393	0.995699	0.679981	-1.47063	33.3154	48.9946	0.446246	0.835782	0.757328	-1.32043	33.3154	43.9908	0.0141535	0.135314	0.550795	-1.81556	33.3154	60.4861
ENSG00000109270	LAMTOR3	0.103447	0.995699	1.69785	1.69785	41.43	24.4015	0.810285	0.95541	1.12671	1.12671	41.43	36.7709	0.20792	0.537999	1.52639	1.52639	41.43	27.1424
ENSG00000152465	NMT2	0.103502	0.995699	0.575318	-1.73817	470.418	817.667	0.277487	0.760636	1.77214	1.77214	470.418	265.453	0.646853	0.858252	1.17548	1.17548	470.418	400.192
ENSG00000164951	PDP1	0.104133	0.995699	1.41166	1.41166	180.603	127.937	0.176819	0.705032	1.55896	1.55896	180.603	115.848	0.0669691	0.305635	1.49651	1.49651	180.603	120.683
ENSG00000180211	---	0.104237	0.995699	0.736855	-1.35712	226.166	306.935	6.27505e-05	0.0698561	0.314341	-3.18126	226.166	719.494	0.00113251	0.0314044	0.530753	-1.88412	226.166	426.123
ENSG00000168591	TMUB2	0.104454	0.995699	0.70071	-1.42712	49.5285	70.6832	0.783929	0.947688	0.911083	-1.09759	49.5285	54.3622	0.0603043	0.292026	0.654031	-1.52898	49.5285	75.728
ENSG00000167862	MRPL58	0.104498	0.995699	1.65996	1.65996	26.0206	15.6754	0.922972	0.981867	0.95553	-1.04654	26.0206	27.2316	0.39564	0.713493	1.31126	1.31126	26.0206	19.844
ENSG00000134444	RELCH	0.104807	0.995699	0.736209	-1.35831	57.9714	78.743	0.132963	0.659276	1.57081	1.57081	57.9714	36.9055	0.313838	0.644078	1.22341	1.22341	57.9714	47.3852
ENSG00000107521	HPS1	0.104881	0.995699	0.680018	-1.47055	48.825	71.7995	0.475156	0.8486	0.769369	-1.29977	48.825	63.461	0.743335	0.900653	0.921613	-1.08505	48.825	52.9778
ENSG00000163945	UVSSA	0.105419	0.995699	0.725678	-1.37802	133.85	184.448	0.875589	0.966887	0.953078	-1.04923	133.85	140.439	0.87709	0.963561	0.968585	-1.03243	133.85	138.191
ENSG00000115677	HDLBP	0.105588	0.995699	0.706491	-1.41545	47.3733	67.0544	0.861251	0.964437	0.943417	-1.05998	47.3733	50.2146	0.277015	0.60823	0.785032	-1.27383	47.3733	60.3457
ENSG00000141582	CBX4	0.105617	0.995699	0.78581	-1.27257	143.115	182.125	0.266115	0.758779	0.774756	-1.29073	143.115	184.723	0.289115	0.621002	0.848821	-1.17811	143.115	168.605
ENSG00000116752	BCAS2	0.105708	0.995699	0.620617	-1.6113	51.9806	83.7564	0.0220666	0.346762	0.354902	-2.81768	51.9806	146.465	0.10427	0.385886	0.608007	-1.64472	51.9806	85.4935
ENSG00000103111	MON1B	0.106018	0.995699	0.764761	-1.3076	123.072	160.929	0.881195	0.96808	0.962302	-1.03918	123.072	127.893	0.34679	0.675006	0.850457	-1.17584	123.072	144.713
ENSG00000139187	KLRG1	0.106052	0.995699	0.613842	-1.62908	46.5213	75.7871	0.11627	0.64179	0.482179	-2.07392	46.5213	96.4814	0.87978	0.96451	0.952809	-1.04953	46.5213	48.8254
ENSG00000163743	RCHY1	0.106304	0.995699	1.48537	1.48537	56.0508	37.7352	0.506661	0.861265	0.781425	-1.27971	56.0508	71.729	0.161898	0.477253	1.4292	1.4292	56.0508	39.2183
ENSG00000136536	MARCHF7	0.106489	0.995699	1.26914	1.26914	227.599	179.334	0.281323	0.760636	0.783732	-1.27595	227.599	290.405	0.936312	0.982135	0.987914	-1.01223	227.599	230.384
ENSG00000145337	PYURF	0.106948	0.995699	1.48732	1.48732	32.7871	22.0444	0.150506	0.684144	0.592069	-1.68899	32.7871	55.3771	0.656361	0.860404	0.895584	-1.11659	32.7871	36.6097
ENSG00000255072	PIGY	0.106948	0.995699	1.48732	1.48732	32.7871	22.0444	0.150506	0.684144	0.592069	-1.68899	32.7871	55.3771	0.656361	0.860404	0.895584	-1.11659	32.7871	36.6097
ENSG00000005810	MYCBP2	0.107084	0.995699	1.32576	1.32576	574.128	433.057	0.372677	0.816373	1.27308	1.27308	574.128	450.976	0.0606531	0.292669	1.40603	1.40603	574.128	408.332
ENSG00000108219	TSPAN14	0.107113	0.995699	0.733747	-1.36287	240.737	328.092	0.59681	0.899499	0.854419	-1.17039	240.737	281.755	0.160277	0.476514	0.755919	-1.32289	240.737	318.469
ENSG00000079950	STX7	0.107736	0.995699	1.4152	1.4152	103.75	73.311	0.291946	0.768523	0.706727	-1.41497	103.75	146.803	0.723076	0.892636	0.924489	-1.08168	103.75	112.224
ENSG00000101544	ADNP2	0.107843	0.995699	0.745386	-1.34159	58.3408	78.2692	0.745562	0.938347	0.91228	-1.09615	58.3408	63.9505	0.503884	0.77687	0.88057	-1.13563	58.3408	66.2534
ENSG00000222328	RNU2-2P	0.107953	0.995699	2.60151	2.60151	425.474	163.549	0.639324	0.912584	1.53964	1.53964	425.474	276.346	0.194759	0.519151	2.22646	2.22646	425.474	191.099
ENSG00000231607	DLEU2	0.108052	0.995699	1.62149	1.62149	66.82	41.209	0.114752	0.637623	2.0939	2.0939	66.82	31.9117	0.0320034	0.212545	1.95753	1.95753	66.82	34.1348
ENSG00000215319	EIF5P1	0.108824	0.995699	1.57898	1.57898	58.6926	37.1713	0.339569	0.799014	1.5224	1.5224	58.6926	38.5527	0.00037933	0.0174761	3.14626	3.14626	58.6926	18.6547
ENSG00000171608	PIK3CD	0.109491	0.995699	0.767354	-1.30318	421.401	549.16	0.872615	0.966887	1.04198	1.04198	421.401	404.423	0.20717	0.536522	0.805321	-1.24174	421.401	523.27
ENSG00000147604	RPL7	0.109804	0.995699	0.652654	-1.5322	969.604	1485.63	0.52243	0.868024	0.767685	-1.30262	969.604	1263.02	0.596059	0.829341	0.863391	-1.15822	969.604	1123.02
ENSG00000104859	CLASRP	0.109987	0.995699	0.739705	-1.35189	44.7064	60.4381	0.400076	0.827139	0.783427	-1.27644	44.7064	57.0652	0.0110376	0.118715	0.612008	-1.63397	44.7064	73.0487
ENSG00000169045	HNRNPH1	0.110025	0.995699	0.741446	-1.34872	1206	1626.55	0.88119	0.96808	0.957581	-1.0443	1206	1259.42	0.666678	0.864907	0.919686	-1.08733	1206	1311.32
ENSG00000172613	RAD9A	0.110028	0.995699	0.528955	-1.89052	27.5958	52.1705	0.707302	0.933942	1.26395	1.26395	27.5958	21.833	0.777468	0.9175	0.888935	-1.12494	27.5958	31.0437
ENSG00000108669	CYTH1	0.11013	0.995699	0.651884	-1.53402	461.552	708.028	0.80704	0.954323	0.903613	-1.10667	461.552	510.785	0.543667	0.800451	0.84458	-1.18402	461.552	546.487
ENSG00000152492	CCDC50	0.110269	0.995699	1.4984	1.4984	86.8639	57.9711	0.62905	0.909656	0.829328	-1.2058	86.8639	104.74	0.58067	0.821809	1.15509	1.15509	86.8639	75.2013
ENSG00000074695	LMAN1	0.110903	0.995699	1.4111	1.4111	222.068	157.373	0.850365	0.963367	0.939123	-1.06482	222.068	236.463	0.930399	0.980152	0.980702	-1.01968	222.068	226.438
ENSG00000187735	TCEA1	0.110971	0.995699	1.49987	1.49987	109.4	72.9391	0.921675	0.981867	1.03921	1.03921	109.4	105.272	0.259812	0.58857	1.34527	1.34527	109.4	81.3219
ENSG00000154429	CCSAP	0.111093	0.995699	0.699829	-1.42892	56.4853	80.713	0.147742	0.680157	1.6728	1.6728	56.4853	33.767	0.0201362	0.165241	1.77493	1.77493	56.4853	31.8239
ENSG00000021776	AQR	0.111152	0.995699	1.26725	1.26725	178.337	140.728	0.0210626	0.343617	1.70758	1.70758	178.337	104.438	0.0638222	0.2985	1.3302	1.3302	178.337	134.068
ENSG00000140931	CMTM3	0.111719	0.995699	0.635778	-1.57288	97.8727	153.942	0.28463	0.761183	0.624483	-1.60133	97.8727	156.726	0.251613	0.580081	0.712462	-1.40358	97.8727	137.373
ENSG00000116350	SRSF4	0.111768	0.995699	0.800085	-1.24987	410.899	513.57	0.41288	0.830537	1.1952	1.1952	410.899	343.792	0.769889	0.913207	0.958283	-1.04353	410.899	428.787
ENSG00000176343	RPL37AP8	0.111798	0.995699	0.646651	-1.54643	30.5992	47.3195	0.00130723	0.106601	0.263381	-3.79678	30.5992	116.178	0.000318684	0.0162141	0.364043	-2.74693	30.5992	84.0539
ENSG00000131779	PEX11B	0.112017	0.995699	1.52485	1.52485	36.36	23.845	0.694115	0.931483	0.854304	-1.17054	36.36	42.5609	0.486953	0.768843	0.830209	-1.20452	36.36	43.7962
ENSG00000178935	ZNF552	0.112407	0.995699	0.538782	-1.85604	36.6087	67.9471	0.501232	0.859163	1.50799	1.50799	36.6087	24.2765	0.574583	0.818273	0.796341	-1.25574	36.6087	45.9711
ENSG00000178694	NSUN3	0.112545	0.995699	1.34661	1.34661	43.0328	31.9564	0.515519	0.865531	1.20488	1.20488	43.0328	35.7154	0.000102038	0.00829201	2.44524	2.44524	43.0328	17.5986
ENSG00000178977	LINC00324	0.112586	0.995699	1.44661	1.44661	28.3122	19.5714	0.937898	0.982844	1.02766	1.02766	28.3122	27.5502	0.89476	0.970388	0.969675	-1.03127	28.3122	29.1976
ENSG00000155957	TMBIM4	0.112977	0.995699	0.759822	-1.3161	172.876	227.521	0.440369	0.834322	0.813305	-1.22955	172.876	212.56	0.495513	0.769554	0.884457	-1.13064	172.876	195.46
ENSG00000116649	SRM	0.113217	0.995699	1.55719	1.55719	23.6307	15.1752	0.825033	0.959937	1.09783	1.09783	23.6307	21.5249	0.013885	0.134062	2.16523	2.16523	23.6307	10.9137
ENSG00000126945	HNRNPH2	0.113285	0.995699	1.35807	1.35807	102.743	75.6535	0.283353	0.760636	0.729337	-1.37111	102.743	140.872	0.869375	0.959576	0.96792	-1.03314	102.743	106.148
ENSG00000180448	ARHGAP45	0.113421	0.995699	0.727226	-1.37509	313.321	430.844	0.0421441	0.455752	0.531708	-1.88073	313.321	589.273	6.82193e-05	0.00630598	0.436202	-2.29251	313.321	718.292
ENSG00000242512	LINC01206	0.113451	0.995699	1.72993	1.72993	34.676	20.0447	0.0878712	0.599638	2.53399	2.53399	34.676	13.6844	0.000347573	0.0169471	4.57074	4.57074	34.676	7.58652
ENSG00000147121	KRBOX4	0.113558	0.995699	1.52919	1.52919	26.329	17.2176	0.231914	0.743971	1.64571	1.64571	26.329	15.9985	0.386751	0.704964	1.26629	1.26629	26.329	20.7922
ENSG00000138794	CASP6	0.113836	0.995699	1.43832	1.43832	45.747	31.8059	0.729187	0.935277	1.12914	1.12914	45.747	40.5148	0.0598441	0.290579	1.57264	1.57264	45.747	29.0893
ENSG00000243646	IL10RB	0.113996	0.995699	0.737591	-1.35576	43.6624	59.1959	0.923584	0.981867	1.02921	1.02921	43.6624	42.4231	0.326025	0.654741	0.821927	-1.21665	43.6624	53.122
ENSG00000117597	UTP25	0.114122	0.995699	1.75418	1.75418	75.3838	42.9739	0.183536	0.710097	2.08465	2.08465	75.3838	36.1613	0.0221202	0.172474	2.34091	2.34091	75.3838	32.2028
ENSG00000112306	RPS12	0.114747	0.995699	0.70242	-1.42365	7857.39	11186.2	0.000559337	0.0965931	0.302085	-3.31032	7857.39	26010.5	0.00110194	0.0309973	0.468302	-2.13537	7857.39	16778.4
ENSG00000145476	CYP4V2	0.114854	0.995699	0.673717	-1.4843	37.2944	55.3561	0.0134627	0.277361	0.390093	-2.56349	37.2944	95.6038	0.00572908	0.0794333	0.491054	-2.03644	37.2944	75.9476
ENSG00000165732	DDX21	0.115203	0.995699	0.758434	-1.31851	522.966	689.535	0.522942	0.868024	0.840633	-1.18958	522.966	622.11	0.112051	0.398546	0.748744	-1.33557	522.966	698.458
ENSG00000136718	IMP4	0.115205	0.995699	0.731092	-1.36782	31.37	42.9085	0.0959401	0.61871	0.605439	-1.65169	31.37	51.8137	0.0408824	0.242846	0.65885	-1.5178	31.37	47.6133
ENSG00000101654	RNMT	0.115417	0.995699	0.78178	-1.27913	205.312	262.621	0.68956	0.928565	1.10185	1.10185	205.312	186.333	0.630023	0.847418	0.924732	-1.08139	205.312	222.023
ENSG00000137478	FCHSD2	0.11549	0.995699	1.65656	1.65656	37.3631	22.5546	0.155324	0.690063	2.03572	2.03572	37.3631	18.3537	0.0394127	0.237736	1.99292	1.99292	37.3631	18.7479
ENSG00000115902	SLC1A4	0.115588	0.995699	1.49055	1.49055	23.0816	15.4853	0.0229607	0.349217	2.57516	2.57516	23.0816	8.96319	0.630625	0.847837	0.88425	-1.1309	23.0816	26.103
ENSG00000132680	KHDC4	0.11559	0.995699	0.762661	-1.3112	81.6147	107.013	0.0532185	0.502228	1.69843	1.69843	81.6147	48.0529	0.00329368	0.0583007	1.74494	1.74494	81.6147	46.7722
ENSG00000111906	HDDC2	0.116043	0.995699	0.678684	-1.47344	32.4778	47.8541	0.0761042	0.575136	0.51337	-1.94791	32.4778	63.264	0.357777	0.683849	0.788508	-1.26822	32.4778	41.1889
ENSG00000106617	PRKAG2	0.11607	0.995699	1.44987	1.44987	75.1712	51.8467	0.344802	0.799577	1.41186	1.41186	75.1712	53.2426	0.227829	0.557752	1.34196	1.34196	75.1712	56.0161
ENSG00000159131	GART	0.116469	0.995699	1.37043	1.37043	60.2964	43.9983	0.0866177	0.598605	1.71174	1.71174	60.2964	35.2253	0.0160636	0.142314	1.65787	1.65787	60.2964	36.3698
ENSG00000180979	LRRC57	0.116624	0.995699	0.638594	-1.56594	42.7877	67.0029	0.225142	0.737987	1.73176	1.73176	42.7877	24.7076	0.651727	0.85972	0.874161	-1.14395	42.7877	48.9471
ENSG00000026103	FAS	0.116741	0.995699	1.39598	1.39598	156.563	112.152	0.133185	0.659276	1.64138	1.64138	156.563	95.3849	0.116428	0.408166	1.41322	1.41322	156.563	110.784
ENSG00000169756	LIMS1	0.116927	0.995699	0.67551	-1.48036	197.234	291.978	0.383071	0.819207	0.713412	-1.40171	197.234	276.466	0.605473	0.833561	0.874232	-1.14386	197.234	225.608
ENSG00000285410	GABPB1-IT1	0.116935	0.995699	0.73897	-1.35323	128.999	174.567	0.175971	0.705032	0.668638	-1.49558	128.999	192.929	0.655134	0.859918	1.09497	1.09497	128.999	117.811
ENSG00000007923	DNAJC11	0.117088	0.995699	0.588849	-1.69823	23.3489	39.6518	0.835577	0.960503	0.896703	-1.1152	23.3489	26.0386	0.176678	0.493599	0.623195	-1.60463	23.3489	37.4665
ENSG00000196531	NACA	0.117099	0.995699	0.731432	-1.36718	890.642	1217.67	0.00645027	0.212025	0.431217	-2.31902	890.642	2065.42	0.0237677	0.180603	0.626095	-1.5972	890.642	1422.53
ENSG00000129933	MAU2	0.117137	0.995699	0.767888	-1.30227	117.316	152.777	0.227186	0.740644	1.37558	1.37558	117.316	85.2847	0.640476	0.855185	0.921451	-1.08524	117.316	127.316
ENSG00000170854	RIOX2	0.117245	0.995699	1.51415	1.51415	41.575	27.4577	0.629739	0.909656	1.21586	1.21586	41.575	34.1939	0.744134	0.901118	1.09208	1.09208	41.575	38.0697
ENSG00000238083	LRRC37A2	0.117481	0.995699	0.617323	-1.6199	140.707	227.931	0.233868	0.744484	0.567074	-1.76344	140.707	248.128	0.00563966	0.078742	0.413238	-2.41991	140.707	340.499
ENSG00000056586	RC3H2	0.117596	0.995699	0.742051	-1.34762	184.417	248.524	0.777152	0.945465	1.08736	1.08736	184.417	169.601	0.679504	0.872187	0.9214	-1.08531	184.417	200.149
ENSG00000140367	UBE2Q2	0.117663	0.995699	0.756267	-1.32228	101.787	134.591	0.392504	0.823825	0.790166	-1.26556	101.787	128.817	0.740037	0.899825	0.940034	-1.06379	101.787	108.28
ENSG00000160392	C19orf47	0.117665	0.995699	1.79348	1.79348	19.2978	10.76	0.895643	0.97173	0.929088	-1.07632	19.2978	20.7706	0.671867	0.86715	1.1735	1.1735	19.2978	16.4446
ENSG00000267469	---	0.117823	0.995699	0.775533	-1.28944	469.6	605.519	0.00892194	0.238128	0.518755	-1.92769	469.6	905.243	0.00995287	0.111774	0.647751	-1.5438	469.6	724.969
ENSG00000257815	PRANCR	0.117846	0.995699	0.657203	-1.5216	44.8204	68.1987	0.572086	0.889986	0.790966	-1.26428	44.8204	56.6654	0.41448	0.726797	0.796183	-1.25599	44.8204	56.2942
ENSG00000205250	E2F4	0.117951	0.995699	0.634294	-1.57656	34.1367	53.8185	0.474632	0.8486	0.725122	-1.37908	34.1367	47.0772	0.377691	0.697062	0.765363	-1.30657	34.1367	44.602
ENSG00000167670	CHAF1A	0.118081	0.995699	0.549333	-1.82039	27.2032	49.5204	0.685134	0.927534	0.785932	-1.27237	27.2032	34.6126	0.371225	0.693056	0.700113	-1.42834	27.2032	38.8554
ENSG00000144713	RPL32	0.118185	0.995699	0.776615	-1.28764	2384.36	3070.2	0.000285276	0.0725718	0.403016	-2.48129	2384.36	5916.3	0.0214579	0.172078	0.679584	-1.47149	2384.36	3508.56
ENSG00000148297	MED22	0.11846	0.995699	0.63679	-1.57038	15.1951	23.862	0.253216	0.749787	0.604237	-1.65498	15.1951	25.1476	0.00316997	0.0577804	0.420212	-2.37975	15.1951	36.1606
ENSG00000182518	FAM104B	0.118486	0.995699	1.68188	1.68188	15.1306	8.99621	0.888001	0.968623	0.932783	-1.07206	15.1306	16.2209	0.652541	0.85972	1.16217	1.16217	15.1306	13.0192
ENSG00000142102	PGGHG	0.118824	0.995699	0.603061	-1.65821	81.8855	135.783	0.289078	0.765338	1.71166	1.71166	81.8855	47.8399	0.951146	0.985738	0.979519	-1.02091	81.8855	83.5976
ENSG00000100804	PSMB5	0.118879	0.995699	1.51185	1.51185	47.4823	31.4067	0.831169	0.960503	0.917664	-1.08972	47.4823	51.7426	0.653303	0.859757	0.886007	-1.12866	47.4823	53.5914
ENSG00000103335	PIEZO1	0.118887	0.995699	0.632948	-1.57991	26.4091	41.7239	0.527836	0.871524	0.751308	-1.33101	26.4091	35.1508	0.402475	0.718358	0.774219	-1.29162	26.4091	34.1106
ENSG00000112576	CCND3	0.119057	0.995699	0.609815	-1.63984	84.7565	138.987	0.0149523	0.290205	0.304302	-3.28621	84.7565	278.528	0.00559282	0.0784739	0.402521	-2.48434	84.7565	210.564
ENSG00000215717	TMEM167B	0.119108	0.995699	0.758289	-1.31876	63.9379	84.3186	0.115547	0.639005	0.652251	-1.53315	63.9379	98.0265	0.26128	0.589568	0.812773	-1.23036	63.9379	78.6663
ENSG00000198695	MT-ND6	0.119508	0.995699	0.619282	-1.61477	1214.06	1960.43	0.875254	0.966887	1.07775	1.07775	1214.06	1126.48	0.19651	0.521678	0.661868	-1.51088	1214.06	1834.3
ENSG00000198042	MAK16	0.119667	0.995699	1.40111	1.40111	40.6031	28.9792	0.663228	0.920406	1.15478	1.15478	40.6031	35.1608	0.682342	0.873607	1.09423	1.09423	40.6031	37.1066
ENSG00000258441	LINC00641	0.119863	0.995699	1.55064	1.55064	46.0239	29.6807	0.178425	0.705032	1.8045	1.8045	46.0239	25.505	0.011761	0.122662	2.11923	2.11923	46.0239	21.7173
ENSG00000103671	TRIP4	0.120506	0.995699	1.48579	1.48579	51.7064	34.8007	0.22231	0.737393	1.62033	1.62033	51.7064	31.911	0.0128603	0.129175	1.95287	1.95287	51.7064	26.4772
ENSG00000157379	DHRS1	0.120815	0.995699	0.740428	-1.35057	60.2821	81.4152	0.641839	0.91376	1.15122	1.15122	60.2821	52.3637	0.14785	0.45675	0.748423	-1.33614	60.2821	80.5455
ENSG00000147471	PLPBP	0.120946	0.995699	0.701322	-1.42588	67.2623	95.9079	0.864389	0.965762	0.941201	-1.06247	67.2623	71.4643	0.370192	0.692208	1.24366	1.24366	67.2623	54.0841
ENSG00000178573	MAF	0.120963	0.995699	1.29026	1.29026	226.409	175.476	0.493003	0.85646	1.18998	1.18998	226.409	190.262	9.60245e-06	0.00182329	2.18272	2.18272	226.409	103.728
ENSG00000148229	POLE3	0.121052	0.995699	0.774071	-1.29187	155.047	200.301	0.244078	0.747219	0.743269	-1.34541	155.047	208.602	0.00540576	0.0773328	0.622334	-1.60686	155.047	249.138
ENSG00000129534	MIS18BP1	0.121603	0.995699	1.53447	1.53447	97.9336	63.8225	0.384961	0.819674	1.44981	1.44981	97.9336	67.5492	0.00625571	0.0833762	2.22057	2.22057	97.9336	44.1029
ENSG00000160712	IL6R	0.121837	0.995699	0.796066	-1.25618	341.787	429.345	0.830625	0.960446	1.0501	1.0501	341.787	325.479	0.672188	0.867249	0.937261	-1.06694	341.787	364.665
ENSG00000198918	RPL39	0.121995	0.995699	0.747902	-1.33707	4994.83	6678.46	0.0022041	0.129503	0.410414	-2.43657	4994.83	12170.2	0.0796223	0.335596	0.710473	-1.40751	4994.83	7030.29
ENSG00000110046	ATG2A	0.12224	0.995699	0.698154	-1.43235	26.1311	37.4288	0.959949	0.988539	1.01841	1.01841	26.1311	25.6586	0.698069	0.880822	0.909776	-1.09917	26.1311	28.7226
ENSG00000122965	RBM19	0.122267	0.995699	1.53303	1.53303	31.2574	20.3893	0.204535	0.726547	1.72583	1.72583	31.2574	18.1115	0.00649837	0.0858284	2.26011	2.26011	31.2574	13.83
ENSG00000175198	PCCA	0.122364	0.995699	0.579999	-1.72414	16.5798	28.5859	0.485098	0.854501	1.48086	1.48086	16.5798	11.196	0.710565	0.884572	0.871826	-1.14702	16.5798	19.0173
ENSG00000214106	PAXIP1-AS2	0.12239	0.995699	1.5012	1.5012	34.8563	23.2189	0.198878	0.722415	1.69126	1.69126	34.8563	20.6097	0.0311454	0.210429	1.8124	1.8124	34.8563	19.2322
ENSG00000102710	SUPT20H	0.122643	0.995699	1.37004	1.37004	93.5109	68.2542	0.490179	0.855875	1.24209	1.24209	93.5109	75.2849	0.268515	0.598101	1.26217	1.26217	93.5109	74.0876
ENSG00000155229	MMS19	0.122885	0.995699	0.764731	-1.30765	206.278	269.739	0.629259	0.909656	0.878198	-1.1387	206.278	234.888	0.00566576	0.078742	0.60811	-1.64444	206.278	339.212
ENSG00000135108	FBXO21	0.123081	0.995699	1.26533	1.26533	112.563	88.9594	0.302589	0.774211	1.27486	1.27486	112.563	88.2944	0.252619	0.581075	1.19706	1.19706	112.563	94.0332
ENSG00000103353	UBFD1	0.123155	0.995699	0.694493	-1.4399	23.7265	34.1638	0.0651839	0.541774	0.517243	-1.93333	23.7265	45.8711	0.176822	0.493599	0.717425	-1.39387	23.7265	33.0717
ENSG00000083720	OXCT1	0.123167	0.995699	0.677628	-1.47574	38.5369	56.8703	0.2272	0.740644	0.626231	-1.59685	38.5369	61.5378	0.577814	0.819983	1.16483	1.16483	38.5369	33.0836
ENSG00000166783	MARF1	0.123265	0.995699	1.42556	1.42556	170.126	119.34	0.343907	0.799577	1.40051	1.40051	170.126	121.474	0.666912	0.865019	1.10768	1.10768	170.126	153.587
ENSG00000205542	TMSB4X	0.123629	0.995699	0.612544	-1.63254	5484.37	8953.43	0.00592193	0.206714	0.257412	-3.88483	5484.37	21305.8	0.0058928	0.0805579	0.402526	-2.48431	5484.37	13624.9
ENSG00000182919	C11orf54	0.123723	0.995699	1.4994	1.4994	97.3033	64.8946	0.152977	0.688513	1.79326	1.79326	97.3033	54.2607	0.000583267	0.0214233	2.63339	2.63339	97.3033	36.9498
ENSG00000135521	LTV1	0.123754	0.995699	0.735223	-1.36013	55.708	75.7703	0.387317	0.821382	0.766458	-1.3047	55.708	72.6824	0.113922	0.403484	0.721533	-1.38594	55.708	77.2079
ENSG00000105887	MTPN	0.12383	0.995699	0.696789	-1.43516	333.17	478.151	0.125688	0.651719	0.573478	-1.74375	333.17	580.964	0.0634908	0.298381	0.636391	-1.57136	333.17	523.531
ENSG00000149474	KAT14	0.123982	0.995699	0.726307	-1.37683	41.4842	57.1166	0.842902	0.963204	0.938081	-1.06601	41.4842	44.2224	0.482909	0.768221	0.859138	-1.16396	41.4842	48.2859
ENSG00000227507	LTB	0.124107	0.995699	0.761962	-1.3124	3017.41	3960.05	0.048688	0.488163	0.582917	-1.71551	3017.41	5176.4	0.000171795	0.0111686	0.501896	-1.99245	3017.41	6012.03
ENSG00000198856	OSTC	0.124143	0.995699	1.45398	1.45398	70.9855	48.8216	0.51118	0.864176	0.783752	-1.27591	70.9855	90.5713	0.896696	0.971315	0.968144	-1.0329	70.9855	73.3212
ENSG00000124782	RREB1	0.12425	0.995699	1.41413	1.41413	52.9121	37.4168	0.483943	0.854501	1.27444	1.27444	52.9121	41.5178	0.000429696	0.0183515	2.46491	2.46491	52.9121	21.4661
ENSG00000181555	SETD2	0.124346	0.995699	1.26503	1.26503	352.031	278.279	0.0317867	0.406903	1.6658	1.6658	352.031	211.329	0.00260196	0.051607	1.61565	1.61565	352.031	217.888
ENSG00000135503	ACVR1B	0.12455	0.995699	1.6075	1.6075	22.1995	13.81	0.118327	0.644679	2.14324	2.14324	22.1995	10.3579	0.312901	0.643415	1.37456	1.37456	22.1995	16.1502
ENSG00000166704	ZNF606	0.124649	0.995699	0.581375	-1.72006	22.7633	39.1543	0.226103	0.739121	1.98719	1.98719	22.7633	11.455	0.484534	0.768603	1.30114	1.30114	22.7633	17.4949
ENSG00000166582	CENPV	0.124676	0.995699	1.49312	1.49312	17.2721	11.5678	0.844072	0.963204	1.07979	1.07979	17.2721	15.9958	0.0266767	0.193414	1.9127	1.9127	17.2721	9.03024
ENSG00000255717	SNHG1	0.125543	0.995699	1.33585	1.33585	108.742	81.4026	0.572961	0.89041	0.849792	-1.17676	108.742	127.963	0.670667	0.867007	1.08627	1.08627	108.742	100.106
ENSG00000100351	GRAP2	0.12562	0.995699	0.70277	-1.42294	152.991	217.697	0.709754	0.934449	0.875689	-1.14196	152.991	174.709	0.674296	0.869202	0.904233	-1.10591	152.991	169.194
ENSG00000138326	RPS24	0.125654	0.995699	0.665422	-1.50281	1966.03	2954.56	0.0604523	0.531184	0.461438	-2.16714	1966.03	4260.65	0.0451085	0.252988	0.575107	-1.73881	1966.03	3418.54
ENSG00000050405	LIMA1	0.125823	0.995699	1.42113	1.42113	75.853	53.375	0.797034	0.952502	1.09482	1.09482	75.853	69.2838	0.00276714	0.053611	2.10049	2.10049	75.853	36.1121
ENSG00000100055	CYTH4	0.125995	0.995699	0.686793	-1.45604	65.9222	95.9856	0.738832	0.936216	0.880895	-1.13521	65.9222	74.8355	0.150664	0.461054	0.693864	-1.44121	65.9222	95.0074
ENSG00000071626	DAZAP1	0.12603	0.995699	0.784799	-1.27421	174.556	222.422	0.0338482	0.414321	0.596517	-1.6764	174.556	292.626	0.000367416	0.0174761	0.558931	-1.78913	174.556	312.304
ENSG00000172315	TP53RK	0.126222	0.995699	1.3975	1.3975	35.2227	25.204	0.440903	0.834322	1.2953	1.2953	35.2227	27.1926	0.237511	0.566521	0.772165	-1.29506	35.2227	45.6155
ENSG00000005469	CROT	0.126248	0.995699	0.703494	-1.42148	42.0121	59.7192	0.40168	0.827139	1.35568	1.35568	42.0121	30.9897	0.108558	0.393297	1.49719	1.49719	42.0121	28.0606
ENSG00000108604	SMARCD2	0.126923	0.995699	0.732486	-1.36521	140.201	191.404	0.132832	0.659276	0.623329	-1.60429	140.201	224.923	0.000224805	0.0132862	0.459866	-2.17455	140.201	304.873
ENSG00000100532	CGRRF1	0.127296	0.995699	0.64522	-1.54986	18.2692	28.3147	0.46489	0.846319	0.723826	-1.38155	18.2692	25.2398	0.833689	0.944603	0.937742	-1.06639	18.2692	19.4821
ENSG00000120690	ELF1	0.127439	0.995699	1.43372	1.43372	183.532	128.011	0.456392	0.839469	0.762747	-1.31105	183.532	240.62	0.921649	0.979107	0.976278	-1.0243	183.532	187.992
ENSG00000188171	ZNF626	0.127543	0.995699	1.65157	1.65157	22.9236	13.8799	0.394446	0.824251	1.53979	1.53979	22.9236	14.8875	0.0134792	0.13216	2.44681	2.44681	22.9236	9.36876
ENSG00000243749	TMEM35B	0.127697	0.995699	1.63641	1.63641	65.8212	40.2229	0.338916	0.798629	1.61334	1.61334	65.8212	40.7981	0.405321	0.720992	1.31967	1.31967	65.8212	49.8771
ENSG00000087191	PSMC5	0.128294	0.995699	0.727955	-1.37371	68.1973	93.6834	0.0508015	0.492982	0.535576	-1.86715	68.1973	127.335	0.00245601	0.0499551	0.521898	-1.91608	68.1973	130.672
ENSG00000117713	ARID1A	0.12834	0.995699	0.7771	-1.28684	189.082	243.318	0.774283	0.94509	1.07661	1.07661	189.082	175.628	0.608443	0.834505	0.91553	-1.09226	189.082	206.527
ENSG00000126353	CCR7	0.128616	0.995699	1.34628	1.34628	145.242	107.884	0.632361	0.909656	1.15522	1.15522	145.242	125.726	0.686866	0.875355	0.922087	-1.0845	145.242	157.514
ENSG00000151465	CDC123	0.128664	0.995699	1.40453	1.40453	27.3807	19.4946	0.206863	0.729058	0.661299	-1.51218	27.3807	41.4044	0.845726	0.949232	1.045	1.045	27.3807	26.2017
ENSG00000147168	IL2RG	0.129076	0.995699	0.790995	-1.26423	207.234	261.992	0.00373365	0.179062	0.502585	-1.98971	207.234	412.337	0.00150089	0.0366816	0.602614	-1.65944	207.234	343.892
ENSG00000149600	COMMD7	0.129097	0.995699	0.683739	-1.46255	47.7582	69.8486	0.35474	0.806053	0.699627	-1.42933	47.7582	68.2624	0.26897	0.598192	0.750141	-1.33308	47.7582	63.6657
ENSG00000136824	SMC2	0.129909	0.995699	1.38749	1.38749	88.0633	63.4694	0.68454	0.927534	1.1446	1.1446	88.0633	76.9382	0.0144203	0.136098	1.74622	1.74622	88.0633	50.4308
ENSG00000029725	RABEP1	0.13001	0.995699	1.38319	1.38319	176.895	127.889	0.32246	0.79156	1.38816	1.38816	176.895	127.431	0.00045543	0.0190988	2.21474	2.21474	176.895	79.8719
ENSG00000289380	---	0.130125	0.995699	0.483532	-2.06811	120.352	248.902	0.748451	0.938873	0.787767	-1.26941	120.352	152.776	0.344201	0.672203	0.624051	-1.60243	120.352	192.856
ENSG00000118705	RPN2	0.130274	0.995699	0.729749	-1.37033	106.717	146.237	0.418946	0.831134	0.771086	-1.29687	106.717	138.398	0.401919	0.718102	0.834128	-1.19886	106.717	127.938
ENSG00000168564	CDKN2AIP	0.130334	0.995699	1.3096	1.3096	82.6678	63.1247	0.663734	0.920406	1.12623	1.12623	82.6678	73.4022	1.30537e-05	0.0021822	2.48358	2.48358	82.6678	33.2858
ENSG00000172354	GNB2	0.13092	0.995699	0.689013	-1.45135	62.7037	91.0051	0.270373	0.759635	0.657822	-1.52017	62.7037	95.3202	0.12688	0.424943	0.677155	-1.47677	62.7037	92.5988
ENSG00000179195	ZNF664	0.131051	0.995699	1.5577	1.5577	67.9569	43.6265	0.273051	0.760636	1.64597	1.64597	67.9569	41.2867	0.0878669	0.356542	1.68205	1.68205	67.9569	40.4013
ENSG00000145439	CBR4	0.131066	0.995699	1.38595	1.38595	81.6403	58.9055	0.171211	0.703071	1.5827	1.5827	81.6403	51.583	0.0418276	0.243241	1.58041	1.58041	81.6403	51.6577
ENSG00000124126	PREX1	0.131256	0.995699	1.2953	1.2953	242.354	187.103	0.440115	0.834322	1.22695	1.22695	242.354	197.526	0.119597	0.412597	1.31876	1.31876	242.354	183.775
ENSG00000132589	FLOT2	0.131358	0.995699	1.37141	1.37141	114.444	83.4498	0.316365	0.785451	0.725798	-1.37779	114.444	157.68	0.972787	0.99281	1.00738	1.00738	114.444	113.605
ENSG00000116641	DOCK7	0.131534	0.995699	1.68031	1.68031	51.58	30.6968	0.0376491	0.427828	3.09401	3.09401	51.58	16.6709	0.000591177	0.0214843	3.63754	3.63754	51.58	14.1799
ENSG00000176340	COX8A	0.131577	0.995699	1.59875	1.59875	66.9441	41.8727	0.0300442	0.397712	0.358284	-2.79108	66.9441	186.847	0.292135	0.624282	0.71465	-1.39929	66.9441	93.674
ENSG00000188846	RPL14	0.131596	0.995699	0.775825	-1.28895	463.617	597.579	0.00102533	0.0993677	0.426081	-2.34697	463.617	1088.1	0.00194852	0.0426996	0.582511	-1.7167	463.617	795.893
ENSG00000225484	NUTM2B-AS1	0.132165	0.995699	1.49374	1.49374	125.636	84.1084	0.450406	0.836693	1.36462	1.36462	125.636	92.0664	0.000456988	0.0190988	2.7323	2.7323	125.636	45.9818
ENSG00000231500	RPS18	0.132245	0.995699	0.730009	-1.36985	1517.95	2079.35	0.000227937	0.0698561	0.30338	-3.29619	1517.95	5003.44	0.000582881	0.0214233	0.474173	-2.10894	1517.95	3201.25
ENSG00000072609	CHFR	0.132486	0.995699	0.706646	-1.41514	39.3213	55.6451	0.840679	0.963204	1.07512	1.07512	39.3213	36.574	0.514951	0.7823	0.855242	-1.16926	39.3213	45.9769
ENSG00000124201	ZNFX1	0.132589	0.995699	0.702283	-1.42393	205.253	292.266	0.398883	0.826439	1.361	1.361	205.253	150.811	0.118887	0.411685	0.683773	-1.46247	205.253	300.178
ENSG00000177738	---	0.132748	0.995699	0.707044	-1.41434	55.249	78.1409	0.854888	0.963367	0.936688	-1.06759	55.249	58.9834	0.508315	0.778976	0.853275	-1.17196	55.249	64.7494
ENSG00000118503	TNFAIP3	0.132832	0.995699	0.764987	-1.30721	443.117	579.247	0.187501	0.711919	0.695367	-1.43809	443.117	637.242	0.0738833	0.321167	0.718632	-1.39153	443.117	616.611
ENSG00000173193	PARP14	0.132916	0.995699	1.39496	1.39496	301.191	215.914	0.216752	0.733853	1.5279	1.5279	301.191	197.127	0.30495	0.637236	1.26546	1.26546	301.191	238.008
ENSG00000139977	NAA30	0.132987	0.995699	1.24402	1.24402	104.452	83.9638	0.13795	0.668165	1.39721	1.39721	104.452	74.7579	0.163874	0.479967	1.23195	1.23195	104.452	84.7863
ENSG00000042445	RETSAT	0.133346	0.995699	0.654396	-1.52813	40.1542	61.3607	0.76708	0.944052	1.13957	1.13957	40.1542	35.2362	0.730818	0.897554	0.903563	-1.10673	40.1542	44.4398
ENSG00000173064	HECTD4	0.13352	0.995699	0.719974	-1.38894	62.5831	86.9242	0.0763731	0.575136	1.85473	1.85473	62.5831	33.7425	0.772365	0.914614	0.936107	-1.06825	62.5831	66.8547
ENSG00000183624	HMCES	0.134107	0.995699	0.649799	-1.53894	77.286	118.938	0.803806	0.953302	0.895112	-1.11718	77.286	86.3423	0.546917	0.802409	0.835037	-1.19755	77.286	92.554
ENSG00000080298	RFX3	0.134232	0.995699	1.38185	1.38185	101.562	73.4973	0.0980144	0.620485	1.74386	1.74386	101.562	58.2396	0.00948449	0.109455	1.79688	1.79688	101.562	56.5212
ENSG00000166946	CCNDBP1	0.134287	0.995699	0.78158	-1.27946	131.015	167.628	0.809472	0.95541	0.940418	-1.06336	131.015	139.315	0.32626	0.654741	0.845744	-1.18239	131.015	154.91
ENSG00000177683	THAP5	0.134367	0.995699	1.43256	1.43256	94.7368	66.1309	0.472548	0.847468	1.30494	1.30494	94.7368	72.5987	0.450197	0.74536	1.20555	1.20555	94.7368	78.5841
ENSG00000152409	JMY	0.134421	0.995699	1.43252	1.43252	142.271	99.3149	0.200666	0.722967	1.61017	1.61017	142.271	88.3575	0.000145659	0.010581	2.65624	2.65624	142.271	53.5611
ENSG00000168872	DDX19A	0.13476	0.995699	0.733657	-1.36303	72.599	98.9549	0.439909	0.834322	0.781325	-1.27988	72.599	92.9179	0.606405	0.833664	0.894722	-1.11767	72.599	81.1414
ENSG00000115896	PLCL1	0.135069	0.995699	0.756396	-1.32206	83.9428	110.977	0.204775	0.726584	1.45155	1.45155	83.9428	57.8296	0.00360372	0.0609403	1.82662	1.82662	83.9428	45.9553
ENSG00000140092	FBLN5	0.135189	0.995699	0.625143	-1.59964	25.5207	40.8237	0.239995	0.745985	0.567145	-1.76322	25.5207	44.9985	0.323506	0.652252	0.723644	-1.38189	25.5207	35.2668
ENSG00000182512	GLRX5	0.136043	0.995699	0.750451	-1.33253	66.1555	88.1544	0.128112	0.654399	0.638239	-1.56681	66.1555	103.653	0.732044	0.897721	0.933117	-1.07168	66.1555	70.8974
ENSG00000269335	IKBKG	0.136063	0.995699	1.5435	1.5435	24.9244	16.148	0.728047	0.935277	1.16635	1.16635	24.9244	21.3696	0.958747	0.988472	0.984949	-1.01528	24.9244	25.3053
ENSG00000083937	CHMP2B	0.136133	0.995699	1.35568	1.35568	97.5986	71.9923	0.7004	0.931483	1.12839	1.12839	97.5986	86.4936	0.0284343	0.199245	1.59764	1.59764	97.5986	61.0893
ENSG00000130338	TULP4	0.136231	0.995699	1.28604	1.28604	116.763	90.7922	0.356354	0.807212	1.27172	1.27172	116.763	91.8143	0.494058	0.769118	1.12614	1.12614	116.763	103.684
ENSG00000145293	ENOPH1	0.136542	0.995699	0.619694	-1.6137	38.8455	62.6849	0.302225	0.774211	0.599826	-1.66715	38.8455	64.7613	0.119089	0.411814	0.595286	-1.67986	38.8455	65.2551
ENSG00000166128	RAB8B	0.136888	0.995699	1.40006	1.40006	144.804	103.427	0.567288	0.888443	1.22112	1.22112	144.804	118.584	0.107245	0.391447	1.45973	1.45973	144.804	99.1994
ENSG00000135766	EGLN1	0.137091	0.995699	1.35096	1.35096	45.019	33.3237	0.437301	0.833814	1.27309	1.27309	45.019	35.3619	0.34341	0.671962	1.21678	1.21678	45.019	36.9984
ENSG00000115946	PNO1	0.137181	0.995699	1.55412	1.55412	32.23	20.7384	0.532207	0.874703	1.3288	1.3288	32.23	24.2549	0.262538	0.59048	1.40736	1.40736	32.23	22.901
ENSG00000122417	ODF2L	0.137474	0.995699	1.26603	1.26603	237.91	187.919	0.0479244	0.483738	1.6296	1.6296	237.91	145.993	0.0899751	0.358724	1.32186	1.32186	237.91	179.981
ENSG00000139636	LMBR1L	0.13765	0.995699	0.667551	-1.49801	107.496	161.031	0.874217	0.966887	1.0692	1.0692	107.496	100.54	0.0800883	0.336407	0.610335	-1.63844	107.496	176.127
ENSG00000168610	STAT3	0.138194	0.995699	0.63641	-1.57131	239.879	376.925	0.774965	0.945308	1.14472	1.14472	239.879	209.552	0.476023	0.76638	0.798042	-1.25307	239.879	300.584
ENSG00000101849	TBL1X	0.138207	0.995699	1.516	1.516	171.453	113.095	0.0814859	0.587572	2.13834	2.13834	171.453	80.1801	0.351589	0.679668	1.31088	1.31088	171.453	130.792
ENSG00000105875	WDR91	0.138458	0.995699	0.689366	-1.45061	33.8868	49.1564	0.514788	0.865275	1.29395	1.29395	33.8868	26.1886	0.566145	0.814058	1.1653	1.1653	33.8868	29.0798
ENSG00000210082	MT-RNR2	0.138584	0.995699	2.56495	2.56495	435277	169702	0.0185057	0.324615	10.1822	10.1822	435277	42748.8	0.0241802	0.182514	4.42991	4.42991	435277	98258.7
ENSG00000115233	PSMD14	0.138731	0.995699	1.45315	1.45315	77.8472	53.5714	0.517118	0.866703	1.28669	1.28669	77.8472	60.5017	0.115051	0.406369	1.51111	1.51111	77.8472	51.5167
ENSG00000124766	SOX4	0.139037	0.995699	0.585458	-1.70807	118.469	202.354	0.730941	0.935277	0.824641	-1.21265	118.469	143.662	0.233629	0.562061	0.639326	-1.56415	118.469	185.304
ENSG00000120686	UFM1	0.139136	0.995699	1.33916	1.33916	162.792	121.563	0.240842	0.745985	0.701238	-1.42605	162.792	232.149	0.435408	0.737144	1.17302	1.17302	162.792	138.78
ENSG00000169926	KLF13	0.139229	0.995699	0.645269	-1.54974	279.381	432.968	0.800363	0.953129	0.890404	-1.12309	279.381	313.768	0.59152	0.82728	0.847766	-1.17957	279.381	329.549
ENSG00000288942	---	0.139358	0.995699	1.73893	1.73893	18.3011	10.5243	0.136263	0.665706	2.41648	2.41648	18.3011	7.57345	0.239928	0.569338	1.56936	1.56936	18.3011	11.6615
ENSG00000198382	UVRAG	0.139492	0.995699	1.38613	1.38613	79.6429	57.4569	0.544052	0.880576	1.22925	1.22925	79.6429	64.7901	0.016505	0.145001	1.74659	1.74659	79.6429	45.5991
ENSG00000155256	ZFYVE27	0.139498	0.995699	0.736598	-1.35759	28.7209	38.9912	0.47568	0.8486	1.26412	1.26412	28.7209	22.7201	0.0271279	0.194581	0.625954	-1.59756	28.7209	45.8833
ENSG00000198804	MT-CO1	0.139718	0.995699	0.725497	-1.37837	5034.74	6939.71	0.994637	0.999494	0.99774	-1.00227	5034.74	5046.15	0.177182	0.494134	0.737565	-1.35581	5034.74	6826.17
ENSG00000088766	CRLS1	0.139818	0.995699	0.708003	-1.41242	37.1267	52.4386	0.376037	0.817243	0.727337	-1.37488	37.1267	51.0447	0.0220882	0.172474	0.577067	-1.7329	37.1267	64.3368
ENSG00000068028	RASSF1	0.139825	0.995699	0.723911	-1.38139	91.535	126.445	0.161597	0.69779	0.62397	-1.60264	91.535	146.698	0.0532483	0.274257	0.64566	-1.5488	91.535	141.77
ENSG00000087460	GNAS	0.140075	0.995699	1.25581	1.25581	471.236	375.245	0.255273	0.750445	1.31244	1.31244	471.236	359.054	0.140731	0.44365	1.26593	1.26593	471.236	372.245
ENSG00000144029	MRPS5	0.140475	0.995699	1.29675	1.29675	129.936	100.201	0.775564	0.945308	0.925881	-1.08005	129.936	140.337	0.361271	0.686298	1.18098	1.18098	129.936	110.024
ENSG00000086189	DIMT1	0.140879	0.995699	1.31143	1.31143	129.18	98.5028	0.552104	0.88237	1.18381	1.18381	129.18	109.122	0.136779	0.437319	1.32831	1.32831	129.18	97.2517
ENSG00000156508	EEF1A1	0.140972	0.995699	0.711812	-1.40487	9203.73	12930	0.0185859	0.324615	0.430882	-2.32082	9203.73	21360.2	0.147184	0.456016	0.706458	-1.41551	9203.73	13028
ENSG00000134440	NARS1	0.14104	0.995699	1.33022	1.33022	153.638	115.498	0.361546	0.807407	1.31446	1.31446	153.638	116.883	0.246133	0.575131	1.26182	1.26182	153.638	121.759
ENSG00000234009	RPL5P34	0.141141	0.995699	0.674991	-1.4815	141.004	208.898	0.00741418	0.22361	0.332015	-3.01191	141.004	424.692	0.264316	0.592989	0.733157	-1.36396	141.004	192.325
ENSG00000078246	TULP3	0.141141	0.995699	1.4222	1.4222	18.9459	13.3215	0.379043	0.817243	1.38218	1.38218	18.9459	13.7073	0.219002	0.547365	1.35043	1.35043	18.9459	14.0295
ENSG00000160908	ZNF394	0.141504	0.995699	0.612354	-1.63304	79.6724	130.108	0.758662	0.942084	0.853147	-1.17213	79.6724	93.3864	0.0159286	0.14207	2.59286	2.59286	79.6724	30.7276
ENSG00000275023	MLLT6	0.141559	0.995699	0.603685	-1.65649	727.296	1204.76	0.444947	0.834567	1.50167	1.50167	727.296	484.324	0.735372	0.897721	1.12811	1.12811	727.296	644.704
ENSG00000114978	MOB1A	0.141742	0.995699	1.43916	1.43916	203.726	141.559	0.731735	0.935277	0.877266	-1.13991	203.726	232.228	0.199268	0.525772	1.39127	1.39127	203.726	146.431
ENSG00000149308	NPAT	0.141806	0.995699	1.25967	1.25967	158.841	126.098	0.356961	0.807282	1.2505	1.2505	158.841	127.022	0.000993804	0.0293174	1.7273	1.7273	158.841	91.9591
ENSG00000105778	AVL9	0.14199	0.995699	0.800712	-1.24889	64.3886	80.4142	0.0876554	0.599638	1.51178	1.51178	64.3886	42.5913	0.109967	0.396193	1.29588	1.29588	64.3886	49.6872
ENSG00000198825	INPP5F	0.142041	0.995699	1.53941	1.53941	34.8782	22.6569	0.423266	0.831134	1.43687	1.43687	34.8782	24.2736	0.00180379	0.0404367	2.89378	2.89378	34.8782	12.0528
ENSG00000185658	BRWD1	0.14224	0.995699	1.24784	1.24784	325.451	260.812	0.057039	0.517413	1.56166	1.56166	325.451	208.401	0.0611303	0.292935	1.34051	1.34051	325.451	242.782
ENSG00000136527	TRA2B	0.142474	0.995699	0.782635	-1.27773	868.509	1109.72	0.0180582	0.323114	0.542738	-1.84251	868.509	1600.24	0.061087	0.292935	0.72269	-1.38372	868.509	1201.77
ENSG00000178988	MRFAP1L1	0.142482	0.995699	1.36573	1.36573	309.5	226.618	0.746646	0.938873	1.11194	1.11194	309.5	278.342	0.580475	0.821766	1.12933	1.12933	309.5	274.057
ENSG00000162065	TBC1D24	0.142631	0.995699	0.65904	-1.51736	22.8375	34.6527	0.272051	0.760636	1.65236	1.65236	22.8375	13.8212	0.761018	0.908357	0.913421	-1.09479	22.8375	25.0022
ENSG00000089154	GCN1	0.142741	0.995699	0.757341	-1.32041	64.7323	85.4731	0.481772	0.853678	0.814108	-1.22834	64.7323	79.5132	0.18195	0.499985	0.769623	-1.29934	64.7323	84.1091
ENSG00000172071	EIF2AK3	0.142907	0.995699	1.25459	1.25459	70.5307	56.2182	0.191785	0.717677	1.36775	1.36775	70.5307	51.5669	0.617093	0.840092	1.08213	1.08213	70.5307	65.1777
ENSG00000104325	DECR1	0.142921	0.995699	0.716938	-1.39482	41.5356	57.9348	0.511956	0.864394	0.794755	-1.25825	41.5356	52.2622	0.627814	0.846077	0.891263	-1.122	41.5356	46.6031
ENSG00000080546	SESN1	0.14293	0.995699	0.687483	-1.45458	84.1962	122.47	0.103988	0.629851	0.527052	-1.89735	84.1962	159.749	0.297826	0.629706	0.758122	-1.31905	84.1962	111.059
ENSG00000163938	GNL3	0.143049	0.995699	1.30298	1.30298	134.713	103.388	0.263925	0.758779	1.36666	1.36666	134.713	98.5713	0.321202	0.651647	1.20328	1.20328	134.713	111.955
ENSG00000265241	RBM8A	0.143109	0.995699	0.814746	-1.22738	286.16	351.226	0.364094	0.808843	0.82188	-1.21672	286.16	348.178	0.00229389	0.0475669	0.643505	-1.55399	286.16	444.69
ENSG00000111912	NCOA7	0.143111	0.995699	1.28493	1.28493	168.872	131.424	0.946285	0.985168	1.0179	1.0179	168.872	165.902	0.813919	0.934603	1.04241	1.04241	168.872	162.002
ENSG00000114626	ABTB1	0.143288	0.995699	0.695563	-1.43768	25.9485	37.3057	0.903308	0.97442	0.954208	-1.04799	25.9485	27.1938	0.816479	0.936526	1.06329	1.06329	25.9485	24.404
ENSG00000142409	ZNF787	0.143753	0.995699	0.643354	-1.55435	13.366	20.7754	0.985409	0.995918	0.991389	-1.00869	13.366	13.482	0.668671	0.865668	1.15233	1.15233	13.366	11.5991
ENSG00000102119	EMD	0.144063	0.995699	0.670977	-1.49036	58.6889	87.4678	0.124733	0.6504	0.524659	-1.906	58.6889	111.861	0.0305727	0.208001	0.54315	-1.84111	58.6889	108.053
ENSG00000153214	TMEM87B	0.144096	0.995699	0.75766	-1.31985	130.809	172.648	0.475409	0.8486	1.23516	1.23516	130.809	105.904	0.645879	0.858252	1.09545	1.09545	130.809	119.411
ENSG00000145425	RPS3A	0.144277	0.995699	0.715358	-1.3979	1410.47	1971.69	0.0139205	0.281831	0.417456	-2.39546	1410.47	3378.72	0.0237082	0.18044	0.583566	-1.7136	1410.47	2416.98
ENSG00000226360	RPL10AP6	0.144465	0.995699	0.647547	-1.54429	156.972	242.41	0.0268186	0.3745	0.361262	-2.76807	156.972	434.51	0.0117449	0.122662	0.459513	-2.17622	156.972	341.605
ENSG00000100478	AP4S1	0.144596	0.995699	0.634887	-1.57508	55.1205	86.8194	0.427836	0.832061	1.47185	1.47185	55.1205	37.4497	0.693428	0.878026	1.13724	1.13724	55.1205	48.4688
ENSG00000204713	TRIM27	0.144681	0.995699	1.41271	1.41271	70.0707	49.6002	0.281645	0.760636	1.48403	1.48403	70.0707	47.2166	0.783038	0.920361	1.06921	1.06921	70.0707	65.5351
ENSG00000143436	MRPL9	0.144938	0.995699	0.665028	-1.5037	38.673	58.1524	0.294603	0.770089	0.63677	-1.57042	38.673	60.733	0.132619	0.433313	0.64695	-1.54571	38.673	59.7774
ENSG00000139154	AEBP2	0.145062	0.995699	1.35094	1.35094	65.7609	48.6779	0.516502	0.865918	1.22867	1.22867	65.7609	53.5218	0.214239	0.545243	1.30295	1.30295	65.7609	50.4709
ENSG00000132436	FIGNL1	0.145145	0.995699	0.644815	-1.55083	27.476	42.6106	0.274555	0.760636	1.69043	1.69043	27.476	16.2539	0.756371	0.907089	1.10354	1.10354	27.476	24.8981
ENSG00000106560	GIMAP2	0.145248	0.995699	1.45301	1.45301	87.5822	60.2763	0.931852	0.982844	0.966891	-1.03424	87.5822	90.5813	0.0554103	0.28018	1.67325	1.67325	87.5822	52.3427
ENSG00000162585	FAAP20	0.145269	0.995699	0.710421	-1.40762	27.7727	39.0933	0.951195	0.986414	0.977878	-1.02262	27.7727	28.401	0.0533807	0.274697	0.627734	-1.59303	27.7727	44.2428
ENSG00000113460	BRIX1	0.145785	0.995699	1.32882	1.32882	75.0497	56.4786	0.713528	0.934449	0.896496	-1.11545	75.0497	83.7145	0.66108	0.862877	0.916321	-1.09132	75.0497	81.9033
ENSG00000143970	ASXL2	0.145919	0.995699	1.22438	1.22438	196.901	160.817	0.0475997	0.483738	1.53575	1.53575	196.901	128.212	0.000539949	0.0212314	1.65833	1.65833	196.901	118.734
ENSG00000104388	RAB2A	0.14604	0.995699	1.30886	1.30886	147.561	112.74	0.313621	0.785194	0.751615	-1.33047	147.561	196.326	0.564425	0.81336	1.11663	1.11663	147.561	132.149
ENSG00000164934	DCAF13	0.146151	0.995699	1.36215	1.36215	43.5229	31.9515	0.248176	0.749787	1.46308	1.46308	43.5229	29.7473	0.00308566	0.0576811	1.98186	1.98186	43.5229	21.9607
ENSG00000196544	BORCS6	0.146479	0.995699	0.700792	-1.42696	54.3701	77.5838	0.18579	0.710292	1.66927	1.66927	54.3701	32.5712	0.899873	0.972284	0.968372	-1.03266	54.3701	56.1459
ENSG00000259877	---	0.146636	0.995699	1.68849	1.68849	12.8361	7.60208	0.485157	0.854501	1.46954	1.46954	12.8361	8.73477	0.715966	0.887085	1.14015	1.14015	12.8361	11.2583
ENSG00000100241	SBF1	0.146684	0.995699	0.78224	-1.27838	104.142	133.132	0.814204	0.956609	1.06374	1.06374	104.142	97.9017	0.215748	0.545522	0.805092	-1.24209	104.142	129.354
ENSG00000145287	PLAC8	0.146686	0.995699	0.694149	-1.44061	160.753	231.582	0.230146	0.742534	0.627196	-1.5944	160.753	256.304	0.459951	0.752986	0.824295	-1.21316	160.753	195.019
ENSG00000105053	VRK3	0.146689	0.995699	0.750814	-1.33189	57.3557	76.3913	0.937241	0.982844	0.976161	-1.02442	57.3557	58.7564	0.512763	0.782209	1.147	1.147	57.3557	50.0048
ENSG00000187954	CYHR1	0.146867	0.995699	0.583386	-1.71413	13.2487	22.71	0.792121	0.950888	1.16704	1.16704	13.2487	11.3524	0.217916	0.546988	0.62242	-1.60663	13.2487	21.2858
ENSG00000112659	CUL9	0.146916	0.995699	0.700416	-1.42772	37.9569	54.1919	0.906087	0.974889	0.956016	-1.04601	37.9569	39.7032	0.397394	0.714164	0.805944	-1.24078	37.9569	47.0962
ENSG00000123349	PFDN5	0.147014	0.995699	0.728863	-1.372	512.968	703.792	0.0490537	0.48854	0.514813	-1.94245	512.968	996.416	0.178699	0.495704	0.737509	-1.35592	512.968	695.542
ENSG00000164442	CITED2	0.147078	0.995699	0.632645	-1.58067	56.9053	89.9482	0.357815	0.807282	0.638653	-1.5658	56.9053	89.102	0.368798	0.691393	0.74451	-1.34317	56.9053	76.4332
ENSG00000138821	SLC39A8	0.147357	0.995699	1.56574	1.56574	24.2862	15.5111	0.536089	0.876751	1.34075	1.34075	24.2862	18.114	0.099953	0.379264	1.70165	1.70165	24.2862	14.2721
ENSG00000088035	ALG6	0.14741	0.995699	1.49942	1.49942	25.8086	17.2124	0.766384	0.944052	1.13448	1.13448	25.8086	22.7492	0.404255	0.720468	1.26887	1.26887	25.8086	20.3398
ENSG00000158109	TPRG1L	0.14774	0.995699	0.750673	-1.33214	50.4874	67.2561	0.326739	0.79156	0.741986	-1.34773	50.4874	68.0435	0.0213283	0.172078	0.626037	-1.59735	50.4874	80.646
ENSG00000145907	G3BP1	0.148116	0.995699	1.17512	1.17512	291.02	247.651	0.0539622	0.506795	1.39628	1.39628	291.02	208.425	0.0247627	0.183633	1.29696	1.29696	291.02	224.386
ENSG00000174652	ZNF266	0.148295	0.995699	0.720767	-1.38741	47.7928	66.3083	0.591585	0.89756	0.828841	-1.2065	47.7928	57.6622	0.347469	0.675767	1.25843	1.25843	47.7928	37.9781
ENSG00000197971	MBP	0.148692	0.995699	1.24893	1.24893	326.56	261.472	0.173242	0.703428	1.38365	1.38365	326.56	236.013	0.893002	0.970008	0.978843	-1.02161	326.56	333.618
ENSG00000085832	EPS15	0.148779	0.995699	1.28008	1.28008	115.227	90.0154	0.255853	0.750445	1.35069	1.35069	115.227	85.3094	0.0749086	0.323486	1.37163	1.37163	115.227	84.0075
ENSG00000025770	NCAPH2	0.149181	0.995699	0.617181	-1.62027	25.7021	41.6444	0.392693	0.823825	0.643659	-1.55362	25.7021	39.9313	0.244949	0.574189	0.667915	-1.4972	25.7021	38.4812
ENSG00000249222	ATP5MGL	0.149207	0.995699	1.41249	1.41249	83.0355	58.7866	0.517541	0.86684	0.789215	-1.26708	83.0355	105.213	0.973968	0.993044	0.992005	-1.00806	83.0355	83.7047
ENSG00000212694	LINC01089	0.150298	0.995699	1.42648	1.42648	52.0701	36.5026	0.160835	0.696725	1.71466	1.71466	52.0701	30.3676	0.34536	0.673197	1.27064	1.27064	52.0701	40.9794
ENSG00000129197	RPAIN	0.150316	0.995699	1.54128	1.54128	53.5675	34.7553	0.780071	0.945751	0.879616	-1.13686	53.5675	60.8988	0.911371	0.975386	1.03492	1.03492	53.5675	51.7599
ENSG00000161654	LSM12	0.151014	0.995699	1.49078	1.49078	42.1879	28.2991	0.965223	0.98927	1.01866	1.01866	42.1879	41.415	0.149203	0.458876	1.51826	1.51826	42.1879	27.787
ENSG00000120699	EXOSC8	0.1512	0.995699	1.29524	1.29524	162.881	125.753	0.113825	0.636173	1.55661	1.55661	162.881	104.638	0.00316962	0.0577804	1.74563	1.74563	162.881	93.3078
ENSG00000248794	---	0.151701	0.995699	0.62978	-1.58786	34.7346	55.1536	0.00740955	0.22361	0.267349	-3.74043	34.7346	129.922	0.0178774	0.154058	0.45439	-2.20075	34.7346	76.4423
ENSG00000196428	TSC22D2	0.152276	0.995699	1.35635	1.35635	72.7138	53.6098	0.0890736	0.603588	1.75985	1.75985	72.7138	41.3181	2.05743e-05	0.00290822	2.79382	2.79382	72.7138	26.0266
ENSG00000172869	DMXL1	0.153559	0.995699	1.45373	1.45373	72.534	49.895	0.575949	0.891142	1.25346	1.25346	72.534	57.867	0.351789	0.679761	1.28645	1.28645	72.534	56.3832
ENSG00000213626	LBH	0.153748	0.995699	0.798266	-1.25272	367.899	460.872	0.11369	0.636173	0.679831	-1.47095	367.899	541.162	0.36711	0.690278	0.86247	-1.15946	367.899	426.564
ENSG00000153107	ANAPC1	0.154306	0.995699	1.32224	1.32224	71.148	53.8089	0.62646	0.909656	1.1578	1.1578	71.148	61.4512	0.848622	0.950614	1.03902	1.03902	71.148	68.4758
ENSG00000013364	MVP	0.154346	0.995699	0.651682	-1.53449	17.7227	27.1954	0.993316	0.99895	0.996073	-1.00394	17.7227	17.7926	0.0883868	0.356807	1.93338	1.93338	17.7227	9.16669
ENSG00000157617	C2CD2	0.154467	0.995699	1.5309	1.5309	17.7239	11.5774	0.161745	0.697914	1.93585	1.93585	17.7239	9.15558	0.386507	0.704964	1.30056	1.30056	17.7239	13.6279
ENSG00000132635	PCED1A	0.155533	0.995699	0.7601	-1.31562	48.8	64.2021	0.636469	0.911031	0.868544	-1.15135	48.8	56.186	0.0148658	0.137478	0.617394	-1.61971	48.8	79.042
ENSG00000247315	ZCCHC3	0.155684	0.995699	1.49345	1.49345	73.8956	49.4798	0.867372	0.966887	1.0752	1.0752	73.8956	68.7274	0.405535	0.720992	1.27458	1.27458	73.8956	57.9766
ENSG00000215105	TTC3P1	0.15597	0.995699	1.3287	1.3287	215.457	162.157	0.0714762	0.561352	1.75251	1.75251	215.457	122.942	0.050996	0.268344	1.50061	1.50061	215.457	143.58
ENSG00000089682	RBM41	0.156208	0.995699	1.33119	1.33119	186.719	140.264	0.0450882	0.472656	1.87644	1.87644	186.719	99.5068	0.00190423	0.0422031	1.92617	1.92617	186.719	96.938
ENSG00000174738	NR1D2	0.156718	0.995699	1.28644	1.28644	75.6467	58.8031	0.936856	0.982844	1.02175	1.02175	75.6467	74.0362	0.138647	0.441175	1.31451	1.31451	75.6467	57.5473
ENSG00000115808	STRN	0.156932	0.995699	0.790238	-1.26544	122.106	154.518	0.561735	0.886008	1.16213	1.16213	122.106	105.071	0.478194	0.766762	0.884823	-1.13017	122.106	138
ENSG00000167220	HDHD2	0.157215	0.995699	1.46337	1.46337	57.433	39.247	0.770013	0.944202	0.886811	-1.12764	57.433	64.7636	0.00180264	0.0404367	2.63834	2.63834	57.433	21.7686
ENSG00000175768	TOMM5	0.157529	0.995699	1.46307	1.46307	67.3077	46.0044	0.126155	0.651855	0.534876	-1.86959	67.3077	125.838	0.824237	0.940602	1.06361	1.06361	67.3077	63.282
ENSG00000181924	COA4	0.157671	0.995699	0.748263	-1.33643	28.3372	37.8707	0.830767	0.960446	0.934224	-1.07041	28.3372	30.3324	0.201354	0.528068	0.763137	-1.31038	28.3372	37.1326
ENSG00000138709	LARP1B	0.157847	0.995699	1.28929	1.28929	64.0923	49.7111	0.831672	0.960503	1.06012	1.06012	64.0923	60.4576	0.580021	0.821405	0.903968	-1.10623	64.0923	70.9011
ENSG00000171865	RNASEH1	0.158396	0.995699	0.732558	-1.36508	123.804	169.002	0.739589	0.936216	1.12069	1.12069	123.804	110.471	0.39518	0.713493	0.823099	-1.21492	123.804	150.412
ENSG00000112339	HBS1L	0.158476	0.995699	1.26022	1.26022	83.8488	66.5349	0.232082	0.743971	1.35443	1.35443	83.8488	61.9072	0.0437088	0.248292	1.41108	1.41108	83.8488	59.4218
ENSG00000101150	TPD52L2	0.15887	0.995699	0.712209	-1.40408	22.3143	31.3311	0.10113	0.624183	0.550212	-1.81748	22.3143	40.5559	0.517925	0.784665	0.848256	-1.17889	22.3143	26.3061
ENSG00000164031	DNAJB14	0.158879	0.995699	1.21342	1.21342	269.263	221.904	0.254404	0.750445	1.27393	1.27393	269.263	211.365	0.0522268	0.271041	1.31879	1.31879	269.263	204.174
ENSG00000135829	DHX9	0.159283	0.995699	1.19579	1.19579	237.447	198.57	0.184381	0.710292	1.29827	1.29827	237.447	182.895	0.675847	0.869849	1.05627	1.05627	237.447	224.797
ENSG00000144741	SLC25A26	0.159329	0.995699	0.811078	-1.23293	132.753	163.675	0.0132549	0.275355	1.7943	1.7943	132.753	73.9857	0.00517252	0.0756064	1.5595	1.5595	132.753	85.1254
ENSG00000213326	RPS7P11	0.159407	0.995699	0.711496	-1.40549	284.392	399.71	0.555269	0.88237	0.80177	-1.24724	284.392	354.705	0.497528	0.771027	1.18676	1.18676	284.392	239.637
ENSG00000183054	RGPD6	0.159542	0.995699	1.40104	1.40104	43.6117	31.128	0.158546	0.695868	1.69426	1.69426	43.6117	25.7409	0.0998324	0.379052	1.505	1.505	43.6117	28.9779
ENSG00000134186	PRPF38B	0.159708	0.995699	0.720203	-1.3885	1309.47	1818.2	0.94354	0.984074	1.02595	1.02595	1309.47	1276.36	0.58825	0.825497	0.877036	-1.1402	1309.47	1493.07
ENSG00000229119	---	0.159875	0.995699	0.639725	-1.56317	47.5473	74.3246	0.083969	0.594078	0.429861	-2.32633	47.5473	110.611	0.0782858	0.333127	0.560224	-1.785	47.5473	84.872
ENSG00000178149	DALRD3	0.160367	0.995699	0.750747	-1.33201	106.604	141.997	0.657931	0.918049	0.869469	-1.15013	106.604	122.608	0.0909189	0.360368	0.699666	-1.42925	106.604	152.363
ENSG00000117543	DPH5	0.160539	0.995699	1.25416	1.25416	79.339	63.2608	0.0404045	0.448438	0.609299	-1.64123	79.339	130.213	0.586425	0.824135	1.09511	1.09511	79.339	72.4484
ENSG00000130429	ARPC1B	0.161014	0.995699	0.74613	-1.34025	690.064	924.858	0.012687	0.270919	0.44684	-2.23794	690.064	1544.32	0.0188686	0.159035	0.601102	-1.66361	690.064	1148
ENSG00000198743	SLC5A3	0.161017	0.995699	1.40286	1.40286	259.238	184.793	0.0302634	0.399709	2.2572	2.2572	259.238	114.849	0.150373	0.460886	1.43367	1.43367	259.238	180.821
ENSG00000154124	OTULIN	0.161458	0.995699	0.812213	-1.2312	54.1071	66.6169	0.134674	0.661054	1.42706	1.42706	54.1071	37.9152	0.0406605	0.242019	1.3954	1.3954	54.1071	38.7752
ENSG00000115525	ST3GAL5	0.161505	0.995699	1.47462	1.47462	38.3904	26.0342	0.428392	0.832061	1.40307	1.40307	38.3904	27.3616	0.391372	0.710272	1.27631	1.27631	38.3904	30.0791
ENSG00000146833	TRIM4	0.16159	0.995699	1.2601	1.2601	129.471	102.747	0.360787	0.807282	1.26251	1.26251	129.471	102.55	0.952122	0.985994	1.01024	1.01024	129.471	128.159
ENSG00000108395	TRIM37	0.1616	0.995699	1.30214	1.30214	49.362	37.9083	0.0444284	0.471992	1.8213	1.8213	49.362	27.1026	0.921766	0.979107	1.01902	1.01902	49.362	48.4406
ENSG00000185697	MYBL1	0.161613	0.995699	1.36165	1.36165	75.6563	55.5623	0.374966	0.816952	1.35288	1.35288	75.6563	55.9225	0.00275148	0.0534847	2.02781	2.02781	75.6563	37.3094
ENSG00000165288	BRWD3	0.161819	0.995699	1.26829	1.26829	117.785	92.8694	0.0624477	0.539014	1.63801	1.63801	117.785	71.9075	0.00755032	0.0949122	1.60759	1.60759	117.785	73.2682
ENSG00000166526	ZNF3	0.162023	0.995699	0.639418	-1.56392	30.0489	46.9942	0.915526	0.979653	1.0543	1.0543	30.0489	28.5013	0.162045	0.477253	0.62956	-1.58841	30.0489	47.73
ENSG00000169446	MMGT1	0.162066	0.995699	0.676831	-1.47747	104.316	154.125	0.336938	0.796856	0.66081	-1.51329	104.316	157.861	0.220456	0.549121	0.701236	-1.42605	104.316	148.761
ENSG00000196154	S100A4	0.162124	0.995699	0.746096	-1.34031	434.354	582.169	0.0025074	0.138404	0.375901	-2.66028	434.354	1155.5	0.12556	0.422644	0.716555	-1.39557	434.354	606.169
ENSG00000204116	CHIC1	0.162294	0.995699	1.53686	1.53686	44.4284	28.9085	0.414268	0.830537	1.47352	1.47352	44.4284	30.1512	0.619367	0.8414	1.16964	1.16964	44.4284	37.9846
ENSG00000198039	ZNF273	0.162655	0.995699	0.682425	-1.46536	14.5816	21.3674	0.722375	0.935277	1.16688	1.16688	14.5816	12.4962	0.74986	0.90409	1.09869	1.09869	14.5816	13.2718
ENSG00000121931	LRIF1	0.162669	0.995699	1.39769	1.39769	79.6674	56.9994	0.344456	0.799577	1.41993	1.41993	79.6674	56.1064	8.25892e-05	0.00729163	2.91742	2.91742	79.6674	27.3074
ENSG00000164830	OXR1	0.162752	0.995699	1.28717	1.28717	114.998	89.3412	0.997768	0.999796	1.00078	1.00078	114.998	114.909	0.00170623	0.0399326	1.83749	1.83749	114.998	62.5842
ENSG00000228844	---	0.163018	0.995699	0.660698	-1.51355	16.9178	25.606	0.0239713	0.354182	0.364662	-2.74226	16.9178	46.3932	0.411164	0.725705	1.36808	1.36808	16.9178	12.3661
ENSG00000153944	MSI2	0.163169	0.995699	1.23001	1.23001	247.211	200.983	0.0934635	0.611694	1.47175	1.47175	247.211	167.971	0.0947555	0.367014	1.29317	1.29317	247.211	191.167
ENSG00000065457	ADAT1	0.163196	0.995699	0.73145	-1.36715	53.376	72.9729	0.500743	0.859163	1.26695	1.26695	53.376	42.1294	0.692193	0.877198	0.911738	-1.09681	53.376	58.5431
ENSG00000163584	RPL22L1	0.163288	0.995699	1.49944	1.49944	66.0049	44.0196	0.0479177	0.483738	0.417542	-2.39497	66.0049	158.08	0.600307	0.831927	0.855237	-1.16927	66.0049	77.1773
ENSG00000280789	PAGR1	0.163703	0.995699	0.770342	-1.29812	121.299	157.461	0.448347	0.836693	0.803062	-1.24523	121.299	151.046	0.00418383	0.0664313	0.574973	-1.73921	121.299	210.965
ENSG00000117335	CD46	0.163868	0.995699	1.30856	1.30856	263.744	201.553	0.122271	0.647563	1.58894	1.58894	263.744	165.988	0.0115192	0.121083	1.6623	1.6623	263.744	158.663
ENSG00000185104	FAF1	0.16393	0.995699	1.72287	1.72287	37.2659	21.6301	0.216235	0.733853	2.1222	2.1222	37.2659	17.56	0.0143641	0.135994	2.77628	2.77628	37.2659	13.4229
ENSG00000243789	JMJD7	0.164193	0.995699	0.661056	-1.51273	28.895	43.7103	0.632857	0.909656	1.25005	1.25005	28.895	23.115	0.850816	0.951658	0.943145	-1.06028	28.895	30.6368
ENSG00000117500	TMED5	0.164313	0.995699	1.25674	1.25674	88.258	70.2279	0.404681	0.827997	1.23494	1.23494	88.258	71.4677	0.00245215	0.0499551	1.70047	1.70047	88.258	51.9021
ENSG00000171681	ATF7IP	0.164387	0.995699	0.688644	-1.45213	412.556	599.085	0.855853	0.963367	1.07847	1.07847	412.556	382.54	0.99496	0.998231	0.998241	-1.00176	412.556	413.284
ENSG00000253729	PRKDC	0.164935	0.995699	1.35808	1.35808	137.188	101.017	0.23021	0.742534	1.50654	1.50654	137.188	91.0618	0.000274784	0.014355	2.35503	2.35503	137.188	58.2533
ENSG00000126698	DNAJC8	0.165019	0.995699	1.3443	1.3443	116.958	87.0027	0.618922	0.905288	0.850021	-1.17644	116.958	137.594	0.608891	0.834728	0.894005	-1.11856	116.958	130.825
ENSG00000165264	NDUFB6	0.165045	0.995699	1.59603	1.59603	34.4215	21.5669	0.183346	0.710097	0.509002	-1.96463	34.4215	67.6255	0.52993	0.793254	0.806399	-1.24008	34.4215	42.6855
ENSG00000196405	EVL	0.165122	0.995699	0.784712	-1.27435	603.955	769.651	0.550821	0.88237	0.851029	-1.17505	603.955	709.676	0.134564	0.435956	0.762515	-1.31145	603.955	792.056
ENSG00000025796	SEC63	0.166466	0.995699	0.847579	-1.17983	201.468	237.699	0.404557	0.827997	1.16768	1.16768	201.468	172.537	0.565583	0.813775	0.931276	-1.0738	201.468	216.336
ENSG00000185650	ZFP36L1	0.166494	0.995699	1.3285	1.3285	947.051	712.871	0.685511	0.927534	1.13735	1.13735	947.051	832.679	0.398305	0.715156	1.19711	1.19711	947.051	791.114
ENSG00000157837	SPPL3	0.166584	0.995699	0.74896	-1.33518	59.1917	79.0318	0.876729	0.966887	1.05171	1.05171	59.1917	56.2812	0.855352	0.953088	0.961026	-1.04055	59.1917	61.5922
ENSG00000005175	RPAP3	0.166615	0.995699	1.32238	1.32238	150.408	113.741	0.339299	0.799014	1.348	1.348	150.408	111.579	0.162072	0.477253	1.34001	1.34001	150.408	112.244
ENSG00000172216	CEBPB	0.166855	0.995699	0.599567	-1.66787	28.7331	47.9231	0.382182	0.818798	0.60733	-1.64655	28.7331	47.3105	0.168651	0.483808	0.590019	-1.69486	28.7331	48.6986
ENSG00000182551	ADI1	0.167295	0.995699	0.685757	-1.45824	52.1482	76.0448	0.378874	0.817243	0.690227	-1.4488	52.1482	75.5523	0.385002	0.703951	0.7814	-1.27975	52.1482	66.7369
ENSG00000161960	EIF4A1	0.167458	0.995699	0.740349	-1.35071	552.316	746.021	0.0597953	0.528493	0.530371	-1.88547	552.316	1041.38	0.0271656	0.194581	0.60709	-1.6472	552.316	909.777
ENSG00000105136	ZNF419	0.167741	0.995699	0.674549	-1.48247	33.407	49.525	0.306007	0.777442	1.58899	1.58899	33.407	21.0241	0.0884243	0.356807	1.70983	1.70983	33.407	19.5382
ENSG00000112079	STK38	0.168026	0.995699	0.794848	-1.2581	433.158	544.957	0.997607	0.999796	1.00077	1.00077	433.158	432.822	0.00283955	0.0544729	0.597547	-1.67351	433.158	724.893
ENSG00000245849	RAD51-AS1	0.168092	0.995699	0.739289	-1.35265	56.9719	77.063	0.72893	0.935277	0.889132	-1.12469	56.9719	64.0758	0.123271	0.420192	0.705488	-1.41746	56.9719	80.7552
ENSG00000168288	MMADHC	0.168645	0.995699	1.37013	1.37013	86.8519	63.3894	0.230181	0.742534	0.658191	-1.51932	86.8519	131.955	0.184807	0.504687	1.37324	1.37324	86.8519	63.2459
ENSG00000155506	LARP1	0.168654	0.995699	0.80705	-1.23908	183.142	226.928	0.845844	0.963204	1.04808	1.04808	183.142	174.741	0.123307	0.420192	0.780089	-1.28191	183.142	234.771
ENSG00000177606	JUN	0.168664	0.995699	0.536606	-1.86357	539.969	1006.27	0.0221789	0.346762	0.201549	-4.96157	539.969	2679.09	0.0713481	0.315329	0.428895	-2.33157	539.969	1258.98
ENSG00000109917	ZPR1	0.168779	0.995699	0.76845	-1.30132	30.2461	39.3598	0.319055	0.788008	0.74748	-1.33783	30.2461	40.464	0.141724	0.445342	0.748752	-1.33556	30.2461	40.3953
ENSG00000164104	HMGB2	0.168909	0.995699	0.706266	-1.4159	297.916	421.819	0.0870062	0.598733	0.512243	-1.9522	297.916	581.592	0.864179	0.957287	0.955974	-1.04605	297.916	311.636
ENSG00000108443	RPS6KB1	0.16893	0.995699	0.818079	-1.22238	112.754	137.828	0.111729	0.636173	1.4413	1.4413	112.754	78.2305	0.481617	0.768189	1.11347	1.11347	112.754	101.264
ENSG00000006125	AP2B1	0.168945	0.995699	1.54157	1.54157	130.33	84.5433	0.947899	0.985168	1.03222	1.03222	130.33	126.261	0.794169	0.92529	0.918738	-1.08845	130.33	141.857
ENSG00000170873	MTSS1	0.169033	0.995699	1.4221	1.4221	44.0834	30.9988	0.109605	0.636173	0.540565	-1.84992	44.0834	81.5507	0.885336	0.966931	1.03865	1.03865	44.0834	42.4432
ENSG00000143772	ITPKB	0.169059	0.995699	0.734926	-1.36068	44.1807	60.1158	0.993644	0.999108	1.00278	1.00278	44.1807	44.0583	0.213851	0.544492	0.749918	-1.33348	44.1807	58.914
ENSG00000142002	DPP9	0.169251	0.995699	1.30126	1.30126	52.8196	40.5911	0.49816	0.858284	1.22058	1.22058	52.8196	43.2742	0.893083	0.970008	0.974206	-1.02648	52.8196	54.2181
ENSG00000248643	RBM14-RBM4	0.169284	0.995699	0.523488	-1.91026	3.01997	5.76893	0.802044	0.953302	0.830442	-1.20418	3.01997	3.63658	0.143581	0.449247	0.494167	-2.02361	3.01997	6.11123
ENSG00000162607	USP1	0.16976	0.995699	1.27559	1.27559	242.425	190.049	0.314927	0.785451	1.31746	1.31746	242.425	184.009	0.00565886	0.078742	1.66951	1.66951	242.425	145.207
ENSG00000135457	TFCP2	0.169861	0.995699	0.729249	-1.37127	96.5234	132.36	0.649632	0.914056	0.850723	-1.17547	96.5234	113.46	0.100674	0.380521	0.67651	-1.47817	96.5234	142.678
ENSG00000162032	SPSB3	0.170247	0.995699	0.711503	-1.40547	31.3466	44.0569	0.16555	0.70011	0.591202	-1.69147	31.3466	53.0219	0.636292	0.852076	0.883774	-1.13151	31.3466	35.4691
ENSG00000141367	CLTC	0.170268	0.995699	1.22823	1.22823	210.509	171.392	0.274983	0.760636	1.28809	1.28809	210.509	163.427	0.989942	0.997389	1.00195	1.00195	210.509	210.1
ENSG00000113558	SKP1	0.170612	0.995699	0.822612	-1.21564	451.481	548.838	0.324931	0.79156	0.805022	-1.2422	451.481	560.83	0.401927	0.718102	0.883389	-1.132	451.481	511.078
ENSG00000110367	DDX6	0.170769	0.995699	0.836869	-1.19493	585.793	699.982	0.580631	0.892347	0.894808	-1.11756	585.793	654.658	0.17995	0.497353	0.834611	-1.19816	585.793	701.875
ENSG00000223482	NUTM2A-AS1	0.170901	0.995699	1.33964	1.33964	115.95	86.5531	0.245472	0.748171	1.46851	1.46851	115.95	78.9574	0.00112773	0.0314044	2.09372	2.09372	115.95	55.3799
ENSG00000103423	DNAJA3	0.170938	0.995699	1.33227	1.33227	49.1599	36.8994	0.539548	0.878577	1.21817	1.21817	49.1599	40.3556	0.680954	0.872785	1.0919	1.0919	49.1599	45.0222
ENSG00000235505	CASP4LP	0.17098	0.995699	1.39266	1.39266	37.026	26.5865	0.862009	0.964732	1.0661	1.0661	37.026	34.7302	0.303397	0.635855	1.29234	1.29234	37.026	28.6503
ENSG00000003509	NDUFAF7	0.17104	0.995699	0.73574	-1.35918	32.1289	43.6689	0.00988676	0.243056	2.65751	2.65751	32.1289	12.0899	0.186966	0.507748	1.37431	1.37431	32.1289	23.3782
ENSG00000123983	ACSL3	0.171083	0.995699	1.21509	1.21509	111.407	91.6866	0.472618	0.847468	1.17038	1.17038	111.407	95.1888	0.0735427	0.320401	1.30291	1.30291	111.407	85.5068
ENSG00000116691	MIIP	0.171095	0.995699	0.67201	-1.48807	19.7097	29.3294	0.217624	0.733853	1.78856	1.78856	19.7097	11.0198	0.17359	0.490901	1.54953	1.54953	19.7097	12.7198
ENSG00000118762	PKD2	0.171551	0.995699	1.51652	1.51652	26.0173	17.156	0.0299444	0.39729	2.92331	2.92331	26.0173	8.89993	0.133137	0.43351	1.60577	1.60577	26.0173	16.2024
ENSG00000183475	ASB7	0.171679	0.995699	1.38257	1.38257	38.1925	27.6243	0.49162	0.856347	1.28464	1.28464	38.1925	29.7302	0.156148	0.4695	1.41629	1.41629	38.1925	26.9666
ENSG00000155636	RBM45	0.171753	0.995699	1.4741	1.4741	23.7056	16.0813	0.694823	0.931483	1.18485	1.18485	23.7056	20.0072	0.886233	0.966931	1.04185	1.04185	23.7056	22.7533
ENSG00000123124	WWP1	0.171844	0.995699	1.25371	1.25371	435.672	347.507	0.629202	0.909656	1.1315	1.1315	435.672	385.039	0.148648	0.457997	1.28146	1.28146	435.672	339.98
ENSG00000164985	PSIP1	0.171889	0.995699	0.859001	-1.16414	632.436	736.246	0.42615	0.831134	1.14719	1.14719	632.436	551.291	0.679975	0.872191	1.04885	1.04885	632.436	602.979
ENSG00000060749	QSER1	0.172034	0.995699	1.31505	1.31505	88.9826	67.6649	0.0471879	0.483738	1.86473	1.86473	88.9826	47.7188	0.170906	0.487173	1.32822	1.32822	88.9826	66.9939
ENSG00000198242	RPL23A	0.172694	0.995699	0.784058	-1.27542	767.075	978.34	0.00860506	0.233094	0.484399	-2.06441	767.075	1583.56	0.309529	0.641644	0.828354	-1.20721	767.075	926.024
ENSG00000164180	TMEM161B	0.172886	0.995699	1.3295	1.3295	145.364	109.338	0.606091	0.901684	1.1809	1.1809	145.364	123.096	0.167891	0.482894	1.34825	1.34825	145.364	107.817
ENSG00000063601	MTMR1	0.173128	0.995699	0.692633	-1.44377	53.8068	77.6844	0.835472	0.960503	0.916864	-1.09067	53.8068	58.6857	0.676745	0.870398	0.889506	-1.12422	53.8068	60.4906
ENSG00000223496	EXOSC6	0.173166	0.995699	0.798646	-1.25212	188.503	236.028	0.754668	0.940625	0.923281	-1.08309	188.503	204.166	0.255604	0.585234	0.82325	-1.2147	188.503	228.974
ENSG00000168066	SF1	0.17319	0.995699	0.79564	-1.25685	774.628	973.591	0.923679	0.981867	1.02523	1.02523	774.628	755.568	0.193105	0.516152	0.797197	-1.2544	774.628	971.69
ENSG00000159228	CBR1	0.173196	0.995699	1.5107	1.5107	26.5777	17.593	0.969921	0.991095	1.01747	1.01747	26.5777	26.1214	0.0893994	0.358026	1.72498	1.72498	26.5777	15.4076
ENSG00000101365	IDH3B	0.173239	0.995699	0.749836	-1.33362	36.0225	48.0405	0.0325974	0.410167	0.5049	-1.98059	36.0225	71.3458	0.000512172	0.0205255	0.473898	-2.11016	36.0225	76.0132
ENSG00000189007	ADAT2	0.173479	0.995699	1.31567	1.31567	99.2385	75.4284	0.266755	0.758779	1.41425	1.41425	99.2385	70.1703	0.686497	0.875355	0.919935	-1.08703	99.2385	107.876
ENSG00000262580	---	0.173584	0.995699	0.737239	-1.35641	44.2669	60.0441	0.0443542	0.471992	2.07333	2.07333	44.2669	21.3507	0.00693158	0.0897271	1.97711	1.97711	44.2669	22.3897
ENSG00000122435	TRMT13	0.173711	0.995699	1.33514	1.33514	88.1721	66.0394	0.0479521	0.483738	1.93074	1.93074	88.1721	45.6674	2.52435e-07	0.0002954	5.22669	5.22669	88.1721	16.8696
ENSG00000189180	ZNF33A	0.173805	0.995699	1.24398	1.24398	192.592	154.819	0.202471	0.72456	1.37289	1.37289	192.592	140.282	0.0186782	0.158386	1.48185	1.48185	192.592	129.967
ENSG00000063322	MED29	0.173958	0.995699	1.47294	1.47294	35.0289	23.7817	0.768894	0.944052	0.880872	-1.13524	35.0289	39.7662	0.804206	0.929004	1.07473	1.07473	35.0289	32.5932
ENSG00000175899	A2M	0.174036	0.995699	0.601817	-1.66163	58.4813	97.1745	0.194201	0.719157	0.473076	-2.11382	58.4813	123.619	0.642746	0.857043	0.834475	-1.19836	58.4813	70.0815
ENSG00000239569	KMT2E-AS1	0.174144	0.995699	0.69479	-1.43928	41.058	59.0941	0.00130497	0.106601	0.270016	-3.70348	41.058	152.058	0.00195638	0.0427118	0.426207	-2.34628	41.058	96.3334
ENSG00000167526	RPL13	0.174331	0.995699	0.779362	-1.2831	3957.3	5077.62	0.00596798	0.206714	0.457766	-2.18452	3957.3	8644.82	0.00641404	0.0849062	0.594991	-1.6807	3957.3	6651.03
ENSG00000003056	M6PR	0.174374	0.995699	1.24144	1.24144	105.688	85.133	0.450204	0.836693	1.20353	1.20353	105.688	87.8146	0.334797	0.664258	1.17148	1.17148	105.688	90.2173
ENSG00000068366	ACSL4	0.174576	0.995699	1.24962	1.24962	80.9995	64.8193	0.26622	0.758779	1.32612	1.32612	80.9995	61.0801	0.020469	0.167269	1.48982	1.48982	80.9995	54.3685
ENSG00000164543	STK17A	0.174883	0.995699	1.28017	1.28017	130.517	101.953	0.893619	0.970589	1.03814	1.03814	130.517	125.722	0.0709852	0.314409	1.40845	1.40845	130.517	92.6669
ENSG00000196792	STRN3	0.175018	0.995699	1.28412	1.28412	102.075	79.4899	0.0364099	0.424371	1.82963	1.82963	102.075	55.79	0.000773427	0.0242811	1.92866	1.92866	102.075	52.9251
ENSG00000120688	WBP4	0.175104	0.995699	0.737505	-1.35592	46.5078	63.0609	0.893056	0.970225	1.04811	1.04811	46.5078	44.373	0.4133	0.726797	0.826507	-1.20991	46.5078	56.2703
ENSG00000144224	UBXN4	0.175134	0.995699	1.17547	1.17547	228.884	194.717	0.145994	0.679713	1.30803	1.30803	228.884	174.984	0.40879	0.724852	1.10693	1.10693	228.884	206.774
ENSG00000165699	TSC1	0.175227	0.995699	1.3874	1.3874	99.8625	71.9783	0.980316	0.995465	1.0092	1.0092	99.8625	98.9518	0.916272	0.976701	0.974213	-1.02647	99.8625	102.506
ENSG00000102158	MAGT1	0.175254	0.995699	1.47629	1.47629	55.7567	37.7682	0.443667	0.834567	0.715155	-1.3983	55.7567	77.9645	0.856342	0.953646	1.05492	1.05492	55.7567	52.8539
ENSG00000205352	PRR13	0.175547	0.995699	0.814972	-1.22704	225.293	276.443	0.00147866	0.113815	0.478519	-2.08978	225.293	470.813	0.00432839	0.0677072	0.640557	-1.56114	225.293	351.714
ENSG00000175061	SNHG29	0.175813	0.995699	0.776968	-1.28705	343.301	441.848	0.0232498	0.349217	0.520417	-1.92154	343.301	659.667	0.115774	0.407577	0.737707	-1.35555	343.301	465.363
ENSG00000150961	SEC24D	0.175873	0.995699	1.40012	1.40012	32.7269	23.3743	0.501026	0.859163	1.29295	1.29295	32.7269	25.3118	0.0697232	0.31165	1.60511	1.60511	32.7269	20.3892
ENSG00000151576	QTRT2	0.175913	0.995699	1.44339	1.44339	38.6913	26.8059	0.721866	0.935277	1.15921	1.15921	38.6913	33.3773	0.250955	0.579683	1.37925	1.37925	38.6913	28.0524
ENSG00000103160	HSDL1	0.176092	0.995699	0.661543	-1.51162	36.745	55.5444	0.587511	0.895843	1.29633	1.29633	36.745	28.3454	0.0114368	0.121083	2.70513	2.70513	36.745	13.5834
ENSG00000110047	EHD1	0.176405	0.995699	0.776175	-1.28837	299.513	385.883	0.701414	0.931483	0.894713	-1.11768	299.513	334.758	0.255859	0.585234	0.80179	-1.24721	299.513	373.555
ENSG00000066027	PPP2R5A	0.177285	0.995699	0.737602	-1.35575	142.431	193.1	0.797877	0.952898	0.91441	-1.0936	142.431	155.763	0.29173	0.623643	0.781375	-1.27979	142.431	182.282
ENSG00000188352	FOCAD	0.177397	0.995699	0.76129	-1.31356	30.0007	39.4078	0.6846	0.927534	1.13785	1.13785	30.0007	26.3662	0.719157	0.889408	0.926911	-1.07885	30.0007	32.3664
ENSG00000104408	EIF3E	0.177654	0.995699	0.815488	-1.22626	399.002	489.28	0.11613	0.64162	0.692684	-1.44366	399.002	576.023	0.245142	0.574189	0.833193	-1.2002	399.002	478.883
ENSG00000122692	SMU1	0.178011	0.995699	1.26712	1.26712	86.9165	68.594	0.419606	0.831134	1.24451	1.24451	86.9165	69.84	0.399321	0.715785	1.16468	1.16468	86.9165	74.6268
ENSG00000134419	RPS15A	0.178264	0.995699	0.717785	-1.39317	1393.56	1941.47	8.24009e-05	0.0698561	0.222808	-4.48817	1393.56	6254.53	0.00607704	0.0817396	0.495856	-2.01671	1393.56	2810.41
ENSG00000169020	ATP5ME	0.178284	0.995699	0.771969	-1.29539	320.105	414.66	0.00225762	0.129503	0.404204	-2.474	320.105	791.939	0.00899989	0.105952	0.594257	-1.68277	320.105	538.664
ENSG00000139496	NUP58	0.178323	0.995699	1.34813	1.34813	101.267	75.1167	0.429423	0.832061	1.31117	1.31117	101.267	77.2343	0.0685138	0.309905	1.52313	1.52313	101.267	66.4862
ENSG00000034677	RNF19A	0.178398	0.995699	1.24797	1.24797	266.105	213.23	0.334428	0.795421	1.27867	1.27867	266.105	208.11	0.000129099	0.0100715	1.94556	1.94556	266.105	136.776
ENSG00000156515	HK1	0.178445	0.995699	1.28068	1.28068	59.8835	46.7592	0.787684	0.949668	1.07859	1.07859	59.8835	55.52	0.873074	0.961764	1.0304	1.0304	59.8835	58.1169
ENSG00000159063	ALG8	0.178636	0.995699	0.787897	-1.2692	58.8583	74.703	0.344325	0.799577	0.773144	-1.29342	58.8583	76.1284	0.330976	0.659794	0.83636	-1.19566	58.8583	70.3744
ENSG00000138658	ZGRF1	0.178748	0.995699	1.62919	1.62919	25.1275	15.4234	0.124379	0.6504	2.41164	2.41164	25.1275	10.4193	0.0289133	0.200624	2.31484	2.31484	25.1275	10.855
ENSG00000007520	TSR3	0.17884	0.995699	0.741587	-1.34846	90.0218	121.391	0.0682873	0.552101	0.536303	-1.86462	90.0218	167.856	0.00150167	0.0366816	0.483088	-2.07001	90.0218	186.346
ENSG00000261002	VPS39-DT	0.178875	0.995699	0.660783	-1.51336	42.7272	64.6614	0.474632	0.8486	0.711585	-1.40531	42.7272	60.0451	0.0606762	0.292669	0.550281	-1.81725	42.7272	77.6461
ENSG00000148303	RPL7A	0.179177	0.995699	0.744615	-1.34298	1463.22	1965.07	0.0159994	0.302044	0.440991	-2.26762	1463.22	3318.03	0.0377809	0.233181	0.622944	-1.60528	1463.22	2348.88
ENSG00000176018	LYSMD3	0.179216	0.995699	1.37318	1.37318	49.1592	35.7996	0.576994	0.891142	1.22425	1.22425	49.1592	40.1545	0.0490492	0.262568	1.62945	1.62945	49.1592	30.1692
ENSG00000203879	GDI1	0.179342	0.995699	1.33831	1.33831	42.5332	31.7813	0.615986	0.904701	0.848608	-1.1784	42.5332	50.1212	0.226541	0.555296	0.767963	-1.30215	42.5332	55.3845
ENSG00000157654	PALM2AKAP2	0.179462	0.995699	1.3187	1.3187	284.145	215.473	0.362953	0.808843	1.3367	1.3367	284.145	212.573	0.380804	0.699776	1.20574	1.20574	284.145	235.661
ENSG00000069493	CLEC2D	0.179812	0.995699	1.24723	1.24723	643.605	516.026	0.0520623	0.497969	1.64268	1.64268	643.605	391.801	0.123256	0.420192	1.30131	1.30131	643.605	494.584
ENSG00000121716	PILRB	0.179925	0.995699	0.74132	-1.34894	68.1883	91.9822	0.821494	0.958436	0.924959	-1.08113	68.1883	73.7203	0.0181824	0.155088	0.580697	-1.72207	68.1883	117.425
ENSG00000245164	LINC00861	0.180109	0.995699	1.28009	1.28009	520.223	406.395	0.0972138	0.618932	1.60604	1.60604	520.223	323.916	0.0536138	0.275559	1.44648	1.44648	520.223	359.648
ENSG00000223361	FTH1P10	0.180403	0.995699	1.28914	1.28914	66.9922	51.9665	0.112849	0.636173	0.636129	-1.57201	66.9922	105.312	0.17306	0.490112	1.31249	1.31249	66.9922	51.0421
ENSG00000078403	MLLT10	0.180715	0.995699	1.27241	1.27241	127.963	100.568	0.192107	0.717764	1.43906	1.43906	127.963	88.9211	0.0287316	0.199891	1.5071	1.5071	127.963	84.9069
ENSG00000172115	CYCS	0.180988	0.995699	0.732274	-1.36561	161.008	219.874	0.112351	0.636173	0.565079	-1.76966	161.008	284.93	0.193289	0.516173	0.7302	-1.36949	161.008	220.499
ENSG00000107651	SEC23IP	0.181171	0.995699	1.26095	1.26095	68.166	54.0591	0.341156	0.799323	1.29019	1.29019	68.166	52.8341	0.533562	0.795584	1.11691	1.11691	68.166	61.0309
ENSG00000140577	CRTC3	0.181254	0.995699	0.8068	-1.23946	150.745	186.844	0.583982	0.893073	0.872973	-1.14551	150.745	172.681	0.00755178	0.0949122	0.642478	-1.55647	150.745	234.631
ENSG00000188976	NOC2L	0.181275	0.995699	0.599806	-1.66721	69.341	115.606	0.609007	0.902181	1.35584	1.35584	69.341	51.1423	0.690042	0.875838	0.853387	-1.1718	69.341	81.2539
ENSG00000204264	PSMB8	0.181728	0.995699	0.68294	-1.46426	119.385	174.81	0.0550306	0.511723	0.429476	-2.32842	119.385	277.978	0.0103055	0.113128	0.46844	-2.13475	119.385	254.856
ENSG00000256537	SMIM10L1	0.182371	0.995699	0.731281	-1.36746	46.6901	63.8469	0.373196	0.816463	0.724999	-1.37931	46.6901	64.4001	0.887756	0.967815	1.03563	1.03563	46.6901	45.0835
ENSG00000197724	PHF2	0.182457	0.995699	0.714022	-1.40052	61.1986	85.7097	0.98507	0.995918	1.00737	1.00737	61.1986	60.751	0.957139	0.988041	1.0143	1.0143	61.1986	60.3359
ENSG00000141664	ZCCHC2	0.183013	0.995699	1.27527	1.27527	217.052	170.201	0.649649	0.914056	1.13664	1.13664	217.052	190.96	0.45566	0.748746	1.15135	1.15135	217.052	188.52
ENSG00000157212	PAXIP1	0.18324	0.995699	1.26788	1.26788	52.1313	41.1168	0.313248	0.785194	1.3203	1.3203	52.1313	39.4845	0.000269816	0.0142224	2.09058	2.09058	52.1313	24.9363
ENSG00000197498	RPF2	0.183289	0.995699	1.44495	1.44495	36.9637	25.5813	0.79818	0.952898	1.11415	1.11415	36.9637	33.1766	0.101438	0.380873	1.60747	1.60747	36.9637	22.9949
ENSG00000198799	LRIG2	0.183395	0.995699	0.685962	-1.45781	40.7085	59.3452	0.250095	0.749787	1.67464	1.67464	40.7085	24.3088	0.409448	0.725113	1.28025	1.28025	40.7085	31.7974
ENSG00000238227	TMEM250	0.183454	0.995699	0.711475	-1.40553	26.4019	37.1087	0.0753293	0.574538	0.501241	-1.99505	26.4019	52.6731	0.000995936	0.0293174	0.424178	-2.3575	26.4019	62.2426
ENSG00000141034	GID4	0.183632	0.995699	0.663986	-1.50606	12.0995	18.2225	0.933081	0.982844	1.0415	1.0415	12.0995	11.6173	0.892636	0.970008	0.956855	-1.04509	12.0995	12.6451
ENSG00000121858	TNFSF10	0.183753	0.995699	1.36148	1.36148	72.4694	53.2286	0.731663	0.935277	1.13014	1.13014	72.4694	64.1245	2.20532e-05	0.00294148	4.12221	4.12221	72.4694	17.5802
ENSG00000182934	SRPRA	0.183811	0.995699	1.35058	1.35058	33.7439	24.9847	0.357156	0.807282	1.37919	1.37919	33.7439	24.4665	0.654306	0.859918	1.10836	1.10836	33.7439	30.4448
ENSG00000112200	ZNF451	0.183904	0.995699	1.28833	1.28833	321.456	249.513	0.434513	0.833814	1.25927	1.25927	321.456	255.272	0.0934948	0.365179	1.39378	1.39378	321.456	230.636
ENSG00000162222	TTC9C	0.184525	0.995699	1.51432	1.51432	67.6099	44.6471	0.166681	0.70011	1.96024	1.96024	67.6099	34.4906	0.00247828	0.0501745	2.75949	2.75949	67.6099	24.5009
ENSG00000143149	ALDH9A1	0.184758	0.995699	1.2752	1.2752	84.7176	66.4347	0.79464	0.951779	0.929757	-1.07555	84.7176	91.1181	0.940504	0.982659	1.01412	1.01412	84.7176	83.538
ENSG00000149483	TMEM138	0.185009	0.995699	1.47517	1.47517	21.5622	14.6167	0.60508	0.901684	1.26072	1.26072	21.5622	17.1031	0.119252	0.41189	1.61325	1.61325	21.5622	13.3657
ENSG00000289100	---	0.185121	0.995699	0.823692	-1.21405	284.283	345.132	0.0524916	0.500209	0.645756	-1.54857	284.283	440.233	0.00180025	0.0404367	0.623713	-1.6033	284.283	455.791
ENSG00000168488	ATXN2L	0.185441	0.995699	0.783191	-1.27683	82.8207	105.748	0.65858	0.918049	1.13543	1.13543	82.8207	72.9425	0.103033	0.384224	0.732956	-1.36434	82.8207	112.995
ENSG00000107949	BCCIP	0.185505	0.995699	1.5481	1.5481	241.533	156.019	0.256088	0.750445	1.78782	1.78782	241.533	135.099	0.00716013	0.0914999	2.52779	2.52779	241.533	95.5507
ENSG00000163565	IFI16	0.185658	0.995699	1.18458	1.18458	498.086	420.476	0.0582283	0.519939	1.45649	1.45649	498.086	341.977	4.61535e-05	0.0049099	1.72595	1.72595	498.086	288.586
ENSG00000071246	VASH1	0.185763	0.995699	1.59859	1.59859	12.8951	8.0665	0.0321167	0.406903	3.66387	3.66387	12.8951	3.51952	0.651311	0.85972	1.17834	1.17834	12.8951	10.9434
ENSG00000099246	RAB18	0.185885	0.995699	1.30217	1.30217	151.315	116.202	0.922298	0.981867	1.03043	1.03043	151.315	146.846	0.245104	0.574189	1.27182	1.27182	151.315	118.975
ENSG00000176563	CNTD1	0.185926	0.995699	0.66	-1.51515	25.4594	38.5749	0.425707	0.831134	0.6803	-1.46994	25.4594	37.4238	0.0508977	0.26829	0.531863	-1.88018	25.4594	47.8684
ENSG00000166529	ZSCAN21	0.186025	0.995699	1.74578	1.74578	15.3673	8.80254	0.353392	0.804633	1.83392	1.83392	15.3673	8.37949	0.590806	0.827031	1.25867	1.25867	15.3673	12.2091
ENSG00000152518	ZFP36L2	0.186028	0.995699	0.74097	-1.34958	433.093	584.495	0.0511244	0.492982	0.504696	-1.98139	433.093	858.127	0.0989535	0.377486	0.67832	-1.47423	433.093	638.478
ENSG00000187325	TAF9B	0.186129	0.995699	0.798233	-1.25277	60.0528	75.2321	0.751711	0.940071	0.920047	-1.0869	60.0528	65.2714	0.988889	0.997241	1.00249	1.00249	60.0528	59.9035
ENSG00000160310	PRMT2	0.186517	0.995699	1.44447	1.44447	696.188	481.968	0.116712	0.643272	1.96799	1.96799	696.188	353.756	0.0732383	0.319789	1.67829	1.67829	696.188	414.819
ENSG00000101104	PABPC1L	0.186525	0.995699	0.729547	-1.37071	25.3524	34.7509	0.996233	0.999796	1.00176	1.00176	25.3524	25.3079	0.453913	0.747289	1.21434	1.21434	25.3524	20.8775
ENSG00000159314	ARHGAP27	0.18656	0.995699	1.34392	1.34392	32.4501	24.1458	0.451579	0.837082	0.777649	-1.28593	32.4501	41.7285	0.24433	0.573895	0.770918	-1.29715	32.4501	42.0928
ENSG00000163564	PYHIN1	0.186562	0.995699	1.52158	1.52158	239.996	157.728	0.0452282	0.472656	2.69052	2.69052	239.996	89.2004	0.0126785	0.128343	2.2811	2.2811	239.996	105.211
ENSG00000164209	SLC25A46	0.186603	0.995699	0.779377	-1.28308	66.8501	85.7738	0.531827	0.87457	0.833652	-1.19954	66.8501	80.1895	0.747618	0.903224	0.938586	-1.06543	66.8501	71.2243
ENSG00000139651	ZNF740	0.186668	0.995699	1.29643	1.29643	44.8444	34.5907	0.653758	0.915877	1.14435	1.14435	44.8444	39.1875	0.0530013	0.273225	0.683003	-1.46412	44.8444	65.6576
ENSG00000113369	ARRDC3	0.186755	0.995699	0.64895	-1.54095	179.674	276.869	0.0557849	0.511723	0.379722	-2.63351	179.674	473.174	0.428147	0.733555	0.763475	-1.3098	179.674	235.338
ENSG00000267100	ILF3-DT	0.186957	0.995699	0.683868	-1.46227	125.004	182.79	0.36519	0.809673	0.668196	-1.49657	125.004	187.077	0.103013	0.384224	0.614693	-1.62683	125.004	203.36
ENSG00000090263	MRPS33	0.187022	0.995699	0.760221	-1.31541	58.3185	76.7125	0.0372884	0.427828	0.516782	-1.93505	58.3185	112.849	0.0279833	0.196947	0.624839	-1.60041	58.3185	93.3337
ENSG00000143319	ISG20L2	0.187023	0.995699	0.654257	-1.52845	176.239	269.373	0.637055	0.911031	1.26553	1.26553	176.239	139.261	0.926922	0.979577	0.969809	-1.03113	176.239	181.726
ENSG00000185834	RPL12P4	0.187176	0.995699	0.704754	-1.41893	227.348	322.592	0.000551843	0.0965931	0.243083	-4.11382	227.348	935.269	0.00382191	0.0631695	0.45143	-2.21518	227.348	503.618
ENSG00000137996	RTCA	0.187319	0.995699	0.711433	-1.40561	50.6174	71.1485	0.718558	0.935277	0.865875	-1.1549	50.6174	58.4581	0.00897519	0.105952	2.35486	2.35486	50.6174	21.4949
ENSG00000087502	ERGIC2	0.187375	0.995699	1.25898	1.25898	142.677	113.328	0.307107	0.778391	1.31782	1.31782	142.677	108.267	0.153337	0.465541	1.29483	1.29483	142.677	110.19
ENSG00000179818	PCBP1-AS1	0.187408	0.995699	0.704176	-1.4201	938.518	1332.79	0.283212	0.760636	0.642659	-1.55603	938.518	1460.37	0.210765	0.540633	0.707783	-1.41286	938.518	1326
ENSG00000157557	ETS2	0.187795	0.995699	1.41225	1.41225	33.3129	23.5885	0.714785	0.934571	1.1576	1.1576	33.3129	28.7776	0.658328	0.861524	1.12545	1.12545	33.3129	29.5997
ENSG00000141682	PMAIP1	0.188098	0.995699	0.67893	-1.47291	65.5728	96.5826	0.0611063	0.533632	0.428513	-2.33365	65.5728	153.024	0.715137	0.887085	1.12132	1.12132	65.5728	58.478
ENSG00000198855	FICD	0.188245	0.995699	1.67027	1.67027	21.8948	13.1085	0.7302	0.935277	1.22804	1.22804	21.8948	17.8291	0.905072	0.973459	0.953937	-1.04829	21.8948	22.952
ENSG00000135040	NAA35	0.188647	0.995699	1.24985	1.24985	101.11	80.8976	0.119677	0.645797	1.50781	1.50781	101.11	67.0572	6.08627e-05	0.00598915	2.09597	2.09597	101.11	48.24
ENSG00000133275	CSNK1G2	0.189371	0.995699	1.38968	1.38968	85.2744	61.3627	0.754635	0.940625	1.12821	1.12821	85.2744	75.5839	0.987663	0.997087	0.996021	-1.00399	85.2744	85.615
ENSG00000117318	ID3	0.189565	0.995699	1.54216	1.54216	117.866	76.4297	0.528337	0.871653	1.37981	1.37981	117.866	85.4222	0.420652	0.728044	1.31683	1.31683	117.866	89.5075
ENSG00000187627	RGPD1	0.189645	0.995699	1.37699	1.37699	100.652	73.0959	0.0232827	0.349217	2.38326	2.38326	100.652	42.233	0.00270573	0.0531249	2.15808	2.15808	100.652	46.6396
ENSG00000164610	RP9	0.189672	0.995699	0.762175	-1.31203	55.9208	73.37	0.0292631	0.392703	0.50273	-1.98914	55.9208	111.234	0.00947907	0.109455	0.575924	-1.73634	55.9208	97.0976
ENSG00000125629	INSIG2	0.189742	0.995699	1.54654	1.54654	35.8372	23.1725	0.316599	0.785589	1.67582	1.67582	35.8372	21.3849	0.0813241	0.339876	1.83133	1.83133	35.8372	19.5689
ENSG00000166197	NOLC1	0.190266	0.995699	1.26898	1.26898	89.7269	70.7079	0.504596	0.860004	1.20558	1.20558	89.7269	74.4262	0.332748	0.661257	1.19923	1.19923	89.7269	74.8205
ENSG00000182307	C8orf33	0.190311	0.995699	1.40687	1.40687	32.6046	23.1754	0.554216	0.88237	0.792981	-1.26106	32.6046	41.1165	0.0139073	0.134062	2.09083	2.09083	32.6046	15.5941
ENSG00000233527	ZNF529-AS1	0.190379	0.995699	0.572833	-1.74571	10.7794	18.8178	0.426453	0.831134	0.594604	-1.68179	10.7794	18.1288	0.0769734	0.328978	0.461279	-2.16789	10.7794	23.3686
ENSG00000223676	RPL34P26	0.190624	0.995699	0.672899	-1.48611	288.414	428.615	0.420833	0.831134	0.685751	-1.45825	288.414	420.581	0.257238	0.585834	0.700501	-1.42755	288.414	411.726
ENSG00000164167	LSM6	0.190777	0.995699	1.41218	1.41218	46.8684	33.1888	0.142375	0.676061	0.557873	-1.79252	46.8684	84.0127	0.366739	0.689964	1.28234	1.28234	46.8684	36.549
ENSG00000116604	MEF2D	0.190799	0.995699	1.49121	1.49121	74.1013	49.6921	0.525999	0.870533	1.34863	1.34863	74.1013	54.9456	0.823673	0.940354	0.93238	-1.07252	74.1013	79.4754
ENSG00000177888	ZBTB41	0.1908	0.995699	1.26819	1.26819	64.3287	50.7247	0.119107	0.644679	1.55533	1.55533	64.3287	41.3601	6.97969e-05	0.00630598	2.24978	2.24978	64.3287	28.5934
ENSG00000174405	LIG4	0.191061	0.995699	1.37751	1.37751	36.0653	26.1815	0.126222	0.651855	1.80033	1.80033	36.0653	20.0326	0.0186029	0.157976	1.84133	1.84133	36.0653	19.5865
ENSG00000254838	GVINP1	0.191391	0.995699	1.34578	1.34578	186.677	138.713	0.293027	0.768834	1.44802	1.44802	186.677	128.919	0.247808	0.576314	1.31283	1.31283	186.677	142.195
ENSG00000071054	MAP4K4	0.191801	0.995699	0.75636	-1.32212	436.181	576.684	0.892995	0.970225	1.04561	1.04561	436.181	417.155	0.148944	0.45867	0.72592	-1.37756	436.181	600.866
ENSG00000004455	AK2	0.191863	0.995699	0.713373	-1.40179	63.5649	89.1047	0.237392	0.745985	0.624464	-1.60137	63.5649	101.791	0.157027	0.471162	0.684359	-1.46122	63.5649	92.8824
ENSG00000079387	SENP1	0.192631	0.995699	1.4327	1.4327	56.6724	39.5563	0.109727	0.636173	1.99411	1.99411	56.6724	28.4198	0.0416894	0.243195	1.79796	1.79796	56.6724	31.5204
ENSG00000162408	NOL9	0.193102	0.995699	0.784094	-1.27536	139.143	177.457	0.69592	0.931483	1.12015	1.12015	139.143	124.218	0.354515	0.680797	0.835784	-1.19648	139.143	166.482
ENSG00000156482	RPL30	0.193303	0.995699	0.713291	-1.40195	3988.27	5591.37	0.000729576	0.0993677	0.256918	-3.89229	3988.27	15523.5	0.00555618	0.0781472	0.473498	-2.11194	3988.27	8423.01
ENSG00000074054	CLASP1	0.193349	0.995699	1.39508	1.39508	43.5461	31.2141	0.654359	0.915877	1.19224	1.19224	43.5461	36.5245	0.228974	0.558043	1.37507	1.37507	43.5461	31.6682
ENSG00000159352	PSMD4	0.193769	0.995699	0.798641	-1.25213	75.542	94.5882	0.0266068	0.374222	0.557413	-1.794	75.542	135.522	0.00124881	0.0327659	0.564458	-1.77161	75.542	133.831
ENSG00000134686	PHC2	0.193787	0.995699	0.674478	-1.48263	12.0182	17.8185	0.087904	0.599638	0.460404	-2.172	12.0182	26.1036	0.0350487	0.222555	0.521822	-1.91636	12.0182	23.0313
ENSG00000124151	NCOA3	0.193877	0.995699	1.2351	1.2351	253.004	204.845	0.545678	0.881247	1.16382	1.16382	253.004	217.39	0.226452	0.555296	1.22593	1.22593	253.004	206.377
ENSG00000186517	ARHGAP30	0.193887	0.995699	0.684825	-1.46023	481.213	702.68	0.304857	0.775868	0.629421	-1.58876	481.213	764.532	0.0969108	0.372308	0.605319	-1.65202	481.213	794.974
ENSG00000165102	HGSNAT	0.193918	0.995699	0.735357	-1.35988	46.9951	63.9079	0.485144	0.854501	1.29576	1.29576	46.9951	36.2683	0.354474	0.680797	1.26188	1.26188	46.9951	37.2423
ENSG00000150093	ITGB1	0.194151	0.995699	1.28062	1.28062	435.115	339.769	0.706724	0.933629	1.11723	1.11723	435.115	389.46	0.124021	0.421263	1.35557	1.35557	435.115	320.982
ENSG00000121579	NAA50	0.194324	0.995699	1.36238	1.36238	71.8562	52.7432	0.699056	0.931483	0.868681	-1.15117	71.8562	82.7187	0.797026	0.927302	0.939121	-1.06483	71.8562	76.5143
ENSG00000134900	TPP2	0.194593	0.995699	1.21653	1.21653	168.75	138.715	0.539529	0.878577	1.15369	1.15369	168.75	146.27	0.0707748	0.313715	1.3282	1.3282	168.75	127.052
ENSG00000106799	TGFBR1	0.194613	0.995699	1.278	1.278	73.6345	57.6172	0.715057	0.934626	1.11174	1.11174	73.6345	66.2333	0.0121809	0.124817	1.65494	1.65494	73.6345	44.4937
ENSG00000107771	CCSER2	0.194734	0.995699	1.25131	1.25131	107.671	86.0469	0.68202	0.927201	0.897383	-1.11435	107.671	119.984	0.110122	0.396505	1.33393	1.33393	107.671	80.7176
ENSG00000159023	EPB41	0.194936	0.995699	0.683315	-1.46345	448.298	656.064	0.442447	0.834439	1.41909	1.41909	448.298	315.906	0.739762	0.899677	0.903623	-1.10666	448.298	496.112
ENSG00000163558	PRKCI	0.195112	0.995699	1.34757	1.34757	40.3729	29.9598	0.242748	0.746358	1.51871	1.51871	40.3729	26.5836	0.0379169	0.233283	1.65262	1.65262	40.3729	24.4296
ENSG00000214612	RPS19P1	0.195323	0.995699	0.630179	-1.58685	67.2979	106.792	0.292777	0.768523	0.560215	-1.78503	67.2979	120.129	0.276758	0.608077	0.668601	-1.49566	67.2979	100.655
ENSG00000154451	GBP5	0.195332	0.995699	1.26551	1.26551	357.976	282.872	0.0910611	0.608336	1.61086	1.61086	357.976	222.227	0.357377	0.683785	1.18934	1.18934	357.976	300.989
ENSG00000106399	RPA3	0.19552	0.995699	1.42931	1.42931	51.9741	36.3631	0.0798057	0.582457	0.481487	-2.0769	51.9741	107.945	0.938314	0.982476	0.97828	-1.0222	51.9741	53.1281
ENSG00000239223	RPL34P31	0.195628	0.995699	0.685459	-1.45888	510.161	744.261	0.265539	0.758779	0.604668	-1.6538	510.161	843.703	0.320353	0.650603	0.740017	-1.35132	510.161	689.39
ENSG00000270629	NBPF14	0.19611	0.995699	1.27314	1.27314	161.85	127.127	0.701937	0.931483	1.11655	1.11655	161.85	144.955	0.176551	0.493599	1.29932	1.29932	161.85	124.566
ENSG00000047644	WWC3	0.196121	0.995699	1.4409	1.4409	83.1392	57.6995	0.47148	0.847468	1.36947	1.36947	83.1392	60.709	0.663997	0.864167	1.13493	1.13493	83.1392	73.255
ENSG00000136143	SUCLA2	0.196649	0.995699	0.701139	-1.42625	13.3802	19.0835	0.256221	0.750445	1.67577	1.67577	13.3802	7.98449	0.0374883	0.232602	2.14549	2.14549	13.3802	6.23643
ENSG00000213433	RPLP1P6	0.197232	0.995699	1.84438	1.84438	13.8625	7.5161	0.148454	0.680726	2.99014	2.99014	13.8625	4.63607	0.00944549	0.109437	4.57968	4.57968	13.8625	3.02696
ENSG00000172831	CES2	0.197627	0.995699	0.67225	-1.48754	25.387	37.7642	0.705056	0.93337	0.834823	-1.19786	25.387	30.41	0.0278283	0.196947	0.498003	-2.00802	25.387	50.9776
ENSG00000171700	RGS19	0.197992	0.995699	0.600303	-1.66583	36.4807	60.7704	0.356685	0.807282	0.568981	-1.75753	36.4807	64.1158	0.547518	0.802488	0.779919	-1.28218	36.4807	46.775
ENSG00000185963	BICD2	0.198094	0.995699	1.41011	1.41011	132.03	93.6306	0.386208	0.820742	1.43064	1.43064	132.03	92.2873	0.0629634	0.297566	1.67665	1.67665	132.03	78.746
ENSG00000132405	TBC1D14	0.198307	0.995699	0.690682	-1.44784	36.3024	52.5602	0.761292	0.942713	1.14618	1.14618	36.3024	31.6726	0.327706	0.655076	1.35261	1.35261	36.3024	26.8388
ENSG00000109180	OCIAD1	0.198413	0.995699	0.749522	-1.33418	227.282	303.236	0.24377	0.747219	0.667689	-1.4977	227.282	340.4	0.0426265	0.245717	0.624415	-1.6015	227.282	363.992
ENSG00000105176	URI1	0.198503	0.995699	1.29769	1.29769	233.772	180.145	0.301356	0.774069	1.38312	1.38312	233.772	169.018	0.000152525	0.010581	2.25458	2.25458	233.772	103.688
ENSG00000197746	PSAP	0.198631	0.995699	0.752105	-1.3296	286.019	380.292	0.0330044	0.411278	0.482006	-2.07466	286.019	593.393	0.000667645	0.0223227	0.458001	-2.1834	286.019	624.495
ENSG00000242028	HYPK	0.198935	0.995699	0.707413	-1.4136	73.5897	104.027	0.214658	0.733853	0.597322	-1.67414	73.5897	123.199	0.0588853	0.28854	0.590705	-1.69289	73.5897	124.58
ENSG00000198954	KIFBP	0.199219	0.995699	1.50248	1.50248	29.0031	19.3034	0.390956	0.823695	1.52284	1.52284	29.0031	19.0453	0.405155	0.720973	1.31103	1.31103	29.0031	22.1223
ENSG00000214413	BBIP1	0.199249	0.995699	0.714586	-1.39941	306.057	428.3	0.282763	0.760636	1.54773	1.54773	306.057	197.746	0.607207	0.834017	0.869585	-1.14997	306.057	351.958
ENSG00000137070	IL11RA	0.199526	0.995699	0.72649	-1.37648	193.551	266.419	0.684494	0.927534	1.17008	1.17008	193.551	165.417	0.265532	0.595031	0.749995	-1.33334	193.551	258.07
ENSG00000243742	RPLP0P2	0.199648	0.995699	1.42477	1.42477	25.4789	17.8829	0.355557	0.806763	0.683978	-1.46204	25.4789	37.2511	0.272592	0.60294	1.37436	1.37436	25.4789	18.5388
ENSG00000011007	ELOA	0.199926	0.995699	1.30728	1.30728	87.8259	67.182	0.417472	0.831134	1.29926	1.29926	87.8259	67.5967	0.682863	0.873775	1.09183	1.09183	87.8259	80.4395
ENSG00000213967	ZNF726	0.199943	0.995699	1.85338	1.85338	10.5004	5.66556	0.147191	0.679726	3.08635	3.08635	10.5004	3.40221	0.056887	0.283772	2.66213	2.66213	10.5004	3.94437
ENSG00000174839	DENND6A	0.200084	0.995699	0.677639	-1.47571	41.8168	61.7095	0.313588	0.785194	0.624162	-1.60215	41.8168	66.9967	0.935996	0.982101	0.974666	-1.02599	41.8168	42.9037
ENSG00000137207	YIPF3	0.200123	0.995699	1.5166	1.5166	24.5745	16.2037	0.312929	0.785194	0.612217	-1.63341	24.5745	40.1402	0.562116	0.811884	1.21457	1.21457	24.5745	20.233
ENSG00000142541	RPL13A	0.200292	0.995699	0.760489	-1.31494	3230.59	4248.05	0.00596039	0.206714	0.402341	-2.48545	3230.59	8029.49	0.021442	0.172078	0.600243	-1.66599	3230.59	5382.14
ENSG00000110911	SLC11A2	0.200393	0.995699	1.26512	1.26512	81.8743	64.7168	0.0585127	0.519939	1.72303	1.72303	81.8743	47.5176	0.0271702	0.194581	1.52682	1.52682	81.8743	53.6241
ENSG00000160710	ADAR	0.20051	0.995699	0.724299	-1.38065	330.512	456.32	0.170434	0.703071	1.71068	1.71068	330.512	193.205	0.644425	0.858252	1.12852	1.12852	330.512	292.873
ENSG00000275066	SYNRG	0.200555	0.995699	0.832296	-1.2015	449.147	539.648	0.583149	0.892702	0.885352	-1.12949	449.147	507.309	0.129229	0.427992	0.798094	-1.25299	449.147	562.775
ENSG00000108055	SMC3	0.200734	0.995699	1.19861	1.19861	460.927	384.55	0.0559481	0.511723	1.52198	1.52198	460.927	302.847	0.00141079	0.03558	1.60192	1.60192	460.927	287.735
ENSG00000133835	HSD17B4	0.201027	0.995699	1.31198	1.31198	69.075	52.6494	0.12113	0.647244	1.67108	1.67108	69.075	41.3355	0.17578	0.493212	1.34615	1.34615	69.075	51.3129
ENSG00000135842	NIBAN1	0.2013	0.995699	1.28793	1.28793	318.455	247.26	0.102754	0.627574	1.65095	1.65095	318.455	192.892	0.280891	0.611708	1.2477	1.2477	318.455	255.233
ENSG00000066422	ZBTB11	0.201631	0.995699	1.27348	1.27348	244.653	192.114	0.0194947	0.333519	1.9921	1.9921	244.653	122.811	0.0019352	0.0425671	1.84582	1.84582	244.653	132.545
ENSG00000140262	TCF12	0.202519	0.995699	1.32028	1.32028	67.8412	51.3838	0.514384	0.865275	1.2449	1.2449	67.8412	54.4953	0.0613426	0.293331	1.53151	1.53151	67.8412	44.2968
ENSG00000004766	VPS50	0.203269	0.995699	1.25832	1.25832	47.7194	37.923	0.0304925	0.401052	1.86325	1.86325	47.7194	25.6109	0.00836471	0.102175	1.65517	1.65517	47.7194	28.8305
ENSG00000114956	DGUOK	0.203498	0.995699	1.34853	1.34853	81.3439	60.3203	0.685186	0.927534	0.864246	-1.15708	81.3439	94.1212	0.537315	0.79631	1.16158	1.16158	81.3439	70.0289
ENSG00000196305	IARS1	0.203587	0.995699	1.30731	1.30731	128.617	98.3834	0.369381	0.81282	1.33999	1.33999	128.617	95.9841	0.781872	0.919729	0.941681	-1.06193	128.617	136.583
ENSG00000180304	OAZ2	0.20368	0.995699	0.787133	-1.27043	53.1611	67.5376	0.617368	0.904701	0.864965	-1.15612	53.1611	61.4604	0.293682	0.625371	0.815013	-1.22697	53.1611	65.2273
ENSG00000163125	RPRD2	0.203862	0.995699	1.22878	1.22878	120.903	98.3931	0.647947	0.914046	0.892976	-1.11985	120.903	135.394	0.833129	0.944603	1.03577	1.03577	120.903	116.728
ENSG00000288701	PRRC2B	0.204208	0.995699	1.46528	1.46528	120.058	81.9353	0.0732843	0.567965	2.31626	2.31626	120.058	51.8326	0.169582	0.48567	1.53509	1.53509	120.058	78.2091
ENSG00000135486	HNRNPA1	0.204706	0.995699	0.739222	-1.35277	937.278	1267.92	0.0130412	0.275355	0.400321	-2.49799	937.278	2341.31	0.0430719	0.246988	0.6064	-1.64908	937.278	1545.64
ENSG00000026297	RNASET2	0.204968	0.995699	0.795017	-1.25783	222.947	280.431	0.630995	0.909656	0.874168	-1.14395	222.947	255.039	0.453495	0.747289	0.86866	-1.1512	222.947	256.656
ENSG00000185641	---	0.205463	0.995699	0.709701	-1.40904	764.439	1077.13	0.000579325	0.0965931	0.236392	-4.23025	764.439	3233.77	0.00669008	0.0873742	0.466647	-2.14295	764.439	1638.15
ENSG00000150637	CD226	0.20555	0.995699	0.758282	-1.31877	85.6779	112.99	0.185673	0.710292	0.640733	-1.56071	85.6779	133.719	0.445497	0.743894	0.840766	-1.18939	85.6779	101.905
ENSG00000023572	GLRX2	0.205561	0.995699	1.18948	1.18948	53.384	44.8801	0.18282	0.710097	1.3285	1.3285	53.384	40.1836	0.829129	0.942703	0.970692	-1.03019	53.384	54.9958
ENSG00000132824	SERINC3	0.205585	0.995699	1.32245	1.32245	236.202	178.609	0.978541	0.995038	0.990875	-1.00921	236.202	238.377	0.1751	0.493212	1.36471	1.36471	236.202	173.078
ENSG00000084073	ZMPSTE24	0.205611	0.995699	1.44679	1.44679	21.3536	14.7593	0.648979	0.914046	1.22474	1.22474	21.3536	17.4353	0.00357452	0.0606218	3.62255	3.62255	21.3536	5.89464
ENSG00000043143	JADE2	0.205643	0.995699	1.46028	1.46028	115.303	78.9593	0.443533	0.834567	1.42569	1.42569	115.303	80.875	0.960279	0.988472	1.0155	1.0155	115.303	113.543
ENSG00000121481	RNF2	0.205675	0.995699	0.765413	-1.30648	31.9508	41.7432	0.25497	0.750445	0.69292	-1.44317	31.9508	46.1103	0.253776	0.582521	0.77922	-1.28333	31.9508	41.0035
ENSG00000103769	RAB11A	0.20596	0.995699	0.723546	-1.38208	95.1107	131.451	0.335887	0.796235	0.683775	-1.46247	95.1107	139.096	0.168505	0.483769	1.45992	1.45992	95.1107	65.1479
ENSG00000249042	FAM151B-DT	0.206269	0.995699	1.57286	1.57286	30.9098	19.652	0.0641136	0.539914	2.87261	2.87261	30.9098	10.7602	0.100473	0.380004	1.84416	1.84416	30.9098	16.761
ENSG00000175595	ERCC4	0.20634	0.995699	1.27475	1.27475	58.9869	46.2733	0.0103147	0.248494	2.19925	2.19925	58.9869	26.8214	1.95522e-06	0.00111785	2.96141	2.96141	58.9869	19.9185
ENSG00000051108	HERPUD1	0.20645	0.995699	1.36816	1.36816	204.328	149.346	0.326898	0.79156	1.45751	1.45751	204.328	140.19	0.950419	0.985686	1.01608	1.01608	204.328	201.094
ENSG00000168297	PXK	0.206543	0.995699	1.30342	1.30342	55.5491	42.618	0.719895	0.935277	1.12221	1.12221	55.5491	49.4998	0.941609	0.98295	0.984451	-1.01579	55.5491	56.4264
ENSG00000145241	CENPC	0.206765	0.995699	1.27068	1.27068	165.738	130.433	0.158067	0.695105	1.51532	1.51532	165.738	109.375	0.0119565	0.124038	1.64545	1.64545	165.738	100.725
ENSG00000172534	HCFC1	0.207283	0.995699	0.699591	-1.42941	181.582	259.555	0.423679	0.831134	0.704196	-1.42006	181.582	257.857	0.0485236	0.261579	0.560292	-1.78478	181.582	324.085
ENSG00000015676	NUDCD3	0.207315	0.995699	0.777782	-1.28571	56.5119	72.6579	0.110863	0.636173	0.615377	-1.62502	56.5119	91.8331	0.273951	0.605052	0.797503	-1.25391	56.5119	70.8611
ENSG00000125450	NUP85	0.20754	0.995699	1.26229	1.26229	81.1749	64.3075	0.35743	0.807282	1.30055	1.30055	81.1749	62.4159	0.618417	0.840892	0.910254	-1.09859	81.1749	89.1782
ENSG00000228794	LINC01128	0.20763	0.995699	1.40292	1.40292	47.0428	33.5321	0.288372	0.764161	1.5565	1.5565	47.0428	30.2234	0.135186	0.436087	1.51659	1.51659	47.0428	31.0188
ENSG00000115165	CYTIP	0.207848	0.995699	1.22579	1.22579	331.715	270.613	0.201608	0.72456	1.37685	1.37685	331.715	240.923	0.56506	0.81336	1.10102	1.10102	331.715	301.279
ENSG00000105939	ZC3HAV1	0.208126	0.995699	0.810751	-1.23342	467.73	576.909	0.0914225	0.608336	0.647414	-1.54461	467.73	722.458	0.14093	0.44404	0.775258	-1.28989	467.73	603.321
ENSG00000105438	KDELR1	0.208499	0.995699	0.802469	-1.24615	95.925	119.537	0.812105	0.956254	0.937681	-1.06646	95.925	102.3	0.783851	0.920818	1.05152	1.05152	95.925	91.2251
ENSG00000108061	SHOC2	0.20894	0.995699	1.248	1.248	123.396	98.8745	0.570731	0.888653	0.858136	-1.16532	123.396	143.795	0.155946	0.4695	1.29757	1.29757	123.396	95.0977
ENSG00000122376	SHLD2	0.209012	0.995699	0.778724	-1.28415	66.7537	85.7219	0.882483	0.96808	1.04678	1.04678	66.7537	63.7703	0.00325821	0.0583007	0.547753	-1.82564	66.7537	121.868
ENSG00000101935	AMMECR1	0.209239	0.995699	0.733209	-1.36387	81.1116	110.626	0.918985	0.980307	1.03979	1.03979	81.1116	78.0076	0.325653	0.654741	1.2923	1.2923	81.1116	62.7655
ENSG00000202198	7SK	0.209243	0.995699	1.84049	1.84049	148.641	80.7618	0.74778	0.938873	1.27332	1.27332	148.641	116.735	0.541154	0.798359	0.735409	-1.35979	148.641	202.121
ENSG00000005889	ZFX	0.209276	0.995699	1.26387	1.26387	114.367	90.49	0.958151	0.988073	0.985089	-1.01514	114.367	116.099	0.80342	0.928706	1.04896	1.04896	114.367	109.029
ENSG00000198700	IPO9	0.20963	0.995699	1.28017	1.28017	108.914	85.078	0.129223	0.655708	1.59125	1.59125	108.914	68.4455	0.585456	0.823043	1.11703	1.11703	108.914	97.5034
ENSG00000182899	RPL35A	0.209831	0.995699	0.759552	-1.31656	2014.38	2652.06	0.000238783	0.0698561	0.287212	-3.48175	2014.38	7013.55	0.0115075	0.121083	0.562574	-1.77754	2014.38	3580.65
ENSG00000144744	UBA3	0.209934	0.995699	1.47713	1.47713	68.698	46.5078	0.944852	0.984214	1.03365	1.03365	68.698	66.4617	0.567778	0.814631	1.20139	1.20139	68.698	57.182
ENSG00000112146	FBXO9	0.209959	0.995699	0.793885	-1.25963	200.227	252.211	0.772099	0.944267	0.920775	-1.08604	200.227	217.455	0.486678	0.768843	0.875532	-1.14216	200.227	228.692
ENSG00000133561	GIMAP6	0.21027	0.995699	0.702865	-1.42275	124.237	176.758	0.557564	0.883375	0.774612	-1.29097	124.237	160.386	0.110795	0.397463	0.62808	-1.59215	124.237	197.804
ENSG00000180011	ZADH2	0.210278	0.995699	1.42072	1.42072	65.6024	46.1756	0.791249	0.950373	1.12088	1.12088	65.6024	58.5276	0.337512	0.667382	1.32053	1.32053	65.6024	49.6789
ENSG00000253506	NACA2	0.210399	0.995699	0.733612	-1.36312	264.934	361.136	0.0224578	0.347252	0.418076	-2.39191	264.934	633.697	0.0878711	0.356542	0.645352	-1.54954	264.934	410.526
ENSG00000173875	ZNF791	0.210549	0.995699	0.753078	-1.32788	113.083	150.161	0.345715	0.799934	1.39534	1.39534	113.083	81.0434	0.408821	0.724852	1.21616	1.21616	113.083	92.9838
ENSG00000112062	MAPK14	0.210818	0.995699	1.25354	1.25354	99.8833	79.6811	0.876239	0.966887	1.04411	1.04411	99.8833	95.6632	0.841986	0.947396	1.03768	1.03768	99.8833	96.2561
ENSG00000286140	DERPC	0.211143	0.995699	0.761545	-1.31312	101.824	133.707	0.269329	0.759565	0.690058	-1.44915	101.824	147.559	0.004455	0.0689582	0.527741	-1.89487	101.824	192.944
ENSG00000023445	BIRC3	0.211203	0.995699	1.1977	1.1977	1543.09	1288.37	0.284635	0.761183	1.27014	1.27014	1543.09	1214.9	0.371831	0.693423	0.874939	-1.14294	1543.09	1763.65
ENSG00000118046	STK11	0.211302	0.995699	1.49532	1.49532	48.5581	32.4733	0.0774072	0.575366	2.44406	2.44406	48.5581	19.8678	0.110449	0.396951	1.70481	1.70481	48.5581	28.483
ENSG00000178607	ERN1	0.211482	0.995699	0.783277	-1.27669	168.807	215.514	0.912853	0.978559	0.967402	-1.0337	168.807	174.496	0.00156124	0.0375919	0.527807	-1.89463	168.807	319.828
ENSG00000198431	TXNRD1	0.211607	0.995699	1.39414	1.39414	70.5037	50.5716	0.0286463	0.388875	2.50335	2.50335	70.5037	28.1638	0.0002543	0.0139351	2.87569	2.87569	70.5037	24.5172
ENSG00000075624	ACTB	0.211802	0.995699	0.77815	-1.2851	2700.94	3470.97	0.00262763	0.143685	0.392279	-2.5492	2700.94	6885.24	0.0740574	0.321208	0.689	-1.45138	2700.94	3920.09
ENSG00000186815	TPCN1	0.212306	0.995699	1.48461	1.48461	41.7721	28.1368	0.412982	0.830537	1.49335	1.49335	41.7721	27.9721	0.211193	0.540776	1.50697	1.50697	41.7721	27.7193
ENSG00000173812	EIF1	0.212448	0.995699	0.750138	-1.33309	901.047	1201.18	0.0274786	0.379192	0.455301	-2.19635	901.047	1979.01	0.108253	0.392676	0.680865	-1.46872	901.047	1323.39
ENSG00000151150	ANK3	0.212486	0.995699	1.58324	1.58324	106.799	67.4561	0.122458	0.647563	2.42501	2.42501	106.799	44.0409	0.0410822	0.243195	2.19073	2.19073	106.799	48.7507
ENSG00000134077	THUMPD3	0.212963	0.995699	1.30467	1.30467	42.7967	32.8027	0.336524	0.796832	1.37357	1.37357	42.7967	31.1572	0.625083	0.844266	1.11241	1.11241	42.7967	38.472
ENSG00000143376	SNX27	0.212977	0.995699	1.38792	1.38792	130.963	94.3593	0.233393	0.744065	1.62656	1.62656	130.963	80.5154	0.488597	0.768843	1.20748	1.20748	130.963	108.46
ENSG00000127616	SMARCA4	0.213049	0.995699	0.719192	-1.39045	130.301	181.176	0.753819	0.940475	0.879364	-1.13719	130.301	148.176	0.163498	0.479753	0.682273	-1.46569	130.301	190.98
ENSG00000198105	ZNF248	0.213445	0.995699	1.4575	1.4575	27.2203	18.676	0.092467	0.609262	2.24449	2.24449	27.2203	12.1276	0.094167	0.366581	1.69437	1.69437	27.2203	16.0652
ENSG00000233016	SNHG7	0.213451	0.995699	0.744268	-1.3436	81.2283	109.138	0.18821	0.713158	0.61821	-1.61757	81.2283	131.393	0.0307497	0.20872	0.588833	-1.69827	81.2283	137.948
ENSG00000151292	CSNK1G3	0.21369	0.995699	1.23039	1.23039	130.072	105.717	0.276508	0.760636	1.32423	1.32423	130.072	98.2252	0.128243	0.426999	1.30071	1.30071	130.072	100.001
ENSG00000123411	IKZF4	0.213907	0.995699	1.30454	1.30454	76.1645	58.3842	0.232733	0.743971	1.48595	1.48595	76.1645	51.2565	0.685338	0.875355	1.09317	1.09317	76.1645	69.6733
ENSG00000174946	GPR171	0.214103	0.995699	1.34327	1.34327	110.087	81.9544	0.00209413	0.127633	3.18919	3.18919	110.087	34.5188	0.0132956	0.131185	1.84726	1.84726	110.087	59.5947
ENSG00000069509	FUNDC1	0.214165	0.995699	0.674081	-1.4835	30.4379	45.1546	0.676406	0.924168	1.23051	1.23051	30.4379	24.736	0.421239	0.728092	1.31342	1.31342	30.4379	23.1745
ENSG00000231389	HLA-DPA1	0.214686	0.995699	1.48308	1.48308	77.4699	52.2358	0.168627	0.703071	0.512229	-1.95225	77.4699	151.241	0.484611	0.768603	1.25959	1.25959	77.4699	61.5039
ENSG00000068912	ERLEC1	0.214724	0.995699	1.22871	1.22871	88.785	72.2588	0.348092	0.802792	1.27204	1.27204	88.785	69.7974	0.00150154	0.0366816	1.75964	1.75964	88.785	50.4564
ENSG00000175203	DCTN2	0.214793	0.995699	0.810407	-1.23395	89.7986	110.807	0.748112	0.938873	0.919334	-1.08774	89.7986	97.6778	0.122478	0.418689	0.763318	-1.31007	89.7986	117.642
ENSG00000121274	TENT4B	0.214828	0.995699	0.781177	-1.28012	206.618	264.496	0.432145	0.833107	0.785229	-1.27351	206.618	263.131	0.167828	0.482894	0.752301	-1.32926	206.618	274.648
ENSG00000108406	DHX40	0.215045	0.995699	0.82518	-1.21186	90.6784	109.889	0.734308	0.936216	0.921975	-1.08463	90.6784	98.3523	0.635293	0.851569	0.926458	-1.07938	90.6784	97.8764
ENSG00000133884	DPF2	0.215219	0.995699	0.750274	-1.33285	51.2471	68.3045	0.646203	0.914046	0.848408	-1.17868	51.2471	60.4038	0.0148525	0.137478	0.559505	-1.7873	51.2471	91.5936
ENSG00000182952	HMGN4	0.215382	0.995699	1.43535	1.43535	77.5227	54.0097	0.841542	0.963204	1.09394	1.09394	77.5227	70.8653	0.557314	0.810615	1.19332	1.19332	77.5227	64.9638
ENSG00000269292	---	0.215755	0.995699	0.706699	-1.41503	146.467	207.255	0.111192	0.636173	0.501667	-1.99335	146.467	291.96	0.0151852	0.13827	0.49405	-2.02409	146.467	296.461
ENSG00000125868	DSTN	0.215863	0.995699	0.815845	-1.22572	119.32	146.253	0.000976702	0.0993677	0.43738	-2.28634	119.32	272.805	0.0200439	0.164715	0.673634	-1.48448	119.32	177.128
ENSG00000258289	CHURC1	0.215902	0.995699	1.232	1.232	284.98	231.315	0.671774	0.922494	0.895758	-1.11637	284.98	318.144	0.489079	0.768843	1.12842	1.12842	284.98	252.547
ENSG00000237550	---	0.216081	0.995699	0.746312	-1.33992	5603.11	7507.73	0.00696703	0.21683	0.372059	-2.68775	5603.11	15059.7	0.056946	0.283772	0.626574	-1.59598	5603.11	8942.45
ENSG00000168827	GFM1	0.216224	0.995699	1.20673	1.20673	126.807	105.084	0.149507	0.682875	1.40494	1.40494	126.807	90.2581	0.440344	0.739972	1.12839	1.12839	126.807	112.378
ENSG00000118246	FASTKD2	0.216234	0.995699	0.750244	-1.3329	51.6136	68.7959	0.874461	0.966887	1.05876	1.05876	51.6136	48.7492	0.111261	0.397671	0.682539	-1.46512	51.6136	75.6201
ENSG00000119041	GTF3C3	0.216752	0.995699	1.29759	1.29759	71.0778	54.7768	0.85297	0.963367	1.06178	1.06178	71.0778	66.9423	0.447899	0.743969	1.17939	1.17939	71.0778	60.2664
ENSG00000273559	CWC25	0.216973	0.995699	1.53235	1.53235	224.824	146.718	0.0948254	0.616855	2.45231	2.45231	224.824	91.6783	0.0809687	0.338876	1.87125	1.87125	224.824	120.147
ENSG00000148481	MINDY3	0.217029	0.995699	0.685819	-1.45811	25.187	36.7254	0.606688	0.901684	1.28061	1.28061	25.187	19.668	0.174323	0.491785	1.58348	1.58348	25.187	15.9061
ENSG00000100242	SUN2	0.217153	0.995699	1.42117	1.42117	154.271	108.552	0.504071	0.860004	0.745957	-1.34056	154.271	206.809	0.116422	0.408166	0.630474	-1.58611	154.271	244.69
ENSG00000181467	RAP2B	0.217359	0.995699	1.24036	1.24036	87.2094	70.3098	0.550333	0.88237	0.853178	-1.17209	87.2094	102.217	0.900497	0.972284	0.977883	-1.02262	87.2094	89.1818
ENSG00000105851	PIK3CG	0.21763	0.995699	0.781139	-1.28018	53.7929	68.8647	0.514596	0.865275	0.81784	-1.22273	53.7929	65.7743	0.399563	0.715785	0.839415	-1.19131	53.7929	64.0837
ENSG00000093000	NUP50	0.217869	0.995699	1.21144	1.21144	151.391	124.967	0.502745	0.859517	1.17462	1.17462	151.391	128.885	0.937805	0.982294	0.987588	-1.01257	151.391	153.294
ENSG00000132549	VPS13B	0.217944	0.995699	1.42626	1.42626	72.9999	51.1828	0.341954	0.799323	1.52837	1.52837	72.9999	47.7632	0.0831128	0.345205	1.6822	1.6822	72.9999	43.3955
ENSG00000176953	NFATC2IP	0.217976	0.995699	0.805103	-1.24208	259.595	322.437	0.654842	0.915877	1.12981	1.12981	259.595	229.768	0.442363	0.741624	0.86915	-1.15055	259.595	298.677
ENSG00000138767	CNOT6L	0.21825	0.995699	1.24709	1.24709	776.892	622.965	0.609524	0.902181	1.15233	1.15233	776.892	674.191	0.494398	0.769118	1.13553	1.13553	776.892	684.164
ENSG00000163939	PBRM1	0.218497	0.995699	1.14166	1.14166	266.325	233.28	0.128469	0.654399	1.28866	1.28866	266.325	206.668	0.378325	0.697411	1.10285	1.10285	266.325	241.488
ENSG00000100335	MIEF1	0.218506	0.995699	1.19879	1.19879	101.198	84.4167	0.762228	0.943074	1.07075	1.07075	101.198	94.5113	0.569014	0.815209	1.09007	1.09007	101.198	92.8361
ENSG00000143013	LMO4	0.21879	0.995699	1.35693	1.35693	79.5981	58.6606	0.53502	0.876175	1.26824	1.26824	79.5981	62.7628	0.140296	0.443137	1.46266	1.46266	79.5981	54.4201
ENSG00000138600	SPPL2A	0.219032	0.995699	1.20965	1.20965	110.065	90.9887	0.187147	0.711499	1.37278	1.37278	110.065	80.1768	0.133217	0.43351	1.27223	1.27223	110.065	86.5137
ENSG00000135698	MPHOSPH6	0.219082	0.995699	1.30106	1.30106	58.5466	44.9992	0.0565196	0.514302	0.541161	-1.84788	58.5466	108.187	0.495164	0.769505	0.861504	-1.16076	58.5466	67.9585
ENSG00000185414	MRPL30	0.219175	0.995699	1.31356	1.31356	76.5084	58.2451	0.812001	0.956254	1.08449	1.08449	76.5084	70.5478	0.170033	0.486247	1.37219	1.37219	76.5084	55.7565
ENSG00000151746	BICD1	0.219407	0.995699	1.40477	1.40477	70.5112	50.1942	0.337577	0.797545	1.50841	1.50841	70.5112	46.7453	0.0417499	0.243241	1.80352	1.80352	70.5112	39.0964
ENSG00000102081	FMR1	0.219489	0.995699	1.21078	1.21078	138.656	114.518	0.00968928	0.241243	1.8834	1.8834	138.656	73.6202	3.37503e-06	0.00111785	2.18658	2.18658	138.656	63.4124
ENSG00000170881	RNF139	0.219824	0.995699	0.693788	-1.44136	70.4654	101.566	0.136831	0.666611	0.505169	-1.97954	70.4654	139.489	0.448503	0.744451	0.790525	-1.26498	70.4654	89.1374
ENSG00000109475	RPL34	0.220106	0.995699	0.727431	-1.3747	5429.4	7463.81	0.10072	0.624183	0.516931	-1.93449	5429.4	10503.1	0.28818	0.619904	0.75114	-1.33131	5429.4	7228.22
ENSG00000112763	BTN2A1	0.220144	0.995699	1.45052	1.45052	239.895	165.385	0.0150286	0.290205	3.15828	3.15828	239.895	75.9575	0.0752699	0.324304	1.75146	1.75146	239.895	136.969
ENSG00000011275	RNF216	0.220147	0.995699	0.832316	-1.20147	130.395	156.665	0.655718	0.916095	1.10927	1.10927	130.395	117.55	0.291164	0.623583	0.849195	-1.17759	130.395	153.551
ENSG00000060762	MPC1	0.220567	0.995699	0.735231	-1.36012	22.5723	30.7009	0.199771	0.722415	0.613008	-1.6313	22.5723	36.8222	0.380272	0.699258	1.28671	1.28671	22.5723	17.5426
ENSG00000143633	C1orf131	0.220585	0.995699	1.27973	1.27973	75.2646	58.8127	0.84916	0.963367	0.94315	-1.06028	75.2646	79.8014	0.776741	0.917271	0.943253	-1.06016	75.2646	79.7926
ENSG00000178425	NT5DC1	0.220585	0.995699	1.25993	1.25993	77.3539	61.3954	0.673342	0.922652	1.12996	1.12996	77.3539	68.4571	0.0846258	0.349186	1.40395	1.40395	77.3539	55.0974
ENSG00000153551	CMTM7	0.220622	0.995699	1.24162	1.24162	189.532	152.649	0.439168	0.834322	0.810643	-1.23359	189.532	233.805	0.823518	0.940354	1.04156	1.04156	189.532	181.97
ENSG00000136261	BZW2	0.220908	0.995699	1.31027	1.31027	56.1908	42.8848	0.816372	0.957364	1.0817	1.0817	56.1908	51.947	0.000540673	0.0212314	2.42692	2.42692	56.1908	23.1532
ENSG00000136942	RPL35	0.221385	0.995699	0.771634	-1.29595	582.872	755.373	0.0201963	0.337746	0.466951	-2.14155	582.872	1248.25	0.184964	0.504769	0.746954	-1.33877	582.872	780.331
ENSG00000116095	PLEKHA3	0.221463	0.995699	1.22709	1.22709	113.685	92.6459	0.715558	0.934673	1.09835	1.09835	113.685	103.505	0.404732	0.720878	1.15482	1.15482	113.685	98.4439
ENSG00000196387	ZNF140	0.221496	0.995699	1.71685	1.71685	24.5674	14.3096	0.379542	0.817243	1.82621	1.82621	24.5674	13.4527	0.319569	0.649543	1.57412	1.57412	24.5674	15.6071
ENSG00000113163	CERT1	0.221598	0.995699	1.32537	1.32537	174.5	131.661	0.233645	0.74418	1.53042	1.53042	174.5	114.021	0.164199	0.480364	1.39447	1.39447	174.5	125.137
ENSG00000143457	GOLPH3L	0.222169	0.995699	1.29492	1.29492	55.0013	42.4746	0.967843	0.989663	0.987065	-1.0131	55.0013	55.722	0.90886	0.973961	1.02509	1.02509	55.0013	53.6553
ENSG00000067704	IARS2	0.222283	0.995699	0.734578	-1.36133	95.2651	129.687	0.73264	0.93616	0.874901	-1.14299	95.2651	108.887	0.684276	0.874934	0.89864	-1.11279	95.2651	106.01
ENSG00000266094	RASSF5	0.22237	0.995699	0.720832	-1.38729	661.681	917.941	0.693679	0.931483	0.849027	-1.17782	661.681	779.341	0.228572	0.558043	0.715161	-1.39829	661.681	925.22
ENSG00000107742	SPOCK2	0.222457	0.995699	1.22991	1.22991	544.785	442.946	0.789801	0.950262	1.07243	1.07243	544.785	507.991	0.986352	0.996983	0.996999	-1.00301	544.785	546.424
ENSG00000150527	MIA2	0.222703	0.995699	0.781108	-1.28023	97.5546	124.893	0.620842	0.905766	1.16876	1.16876	97.5546	83.4684	0.718329	0.888921	1.0793	1.0793	97.5546	90.3869
ENSG00000152193	OBI1	0.222796	0.995699	0.737846	-1.3553	57.3021	77.6614	0.405997	0.828563	1.38355	1.38355	57.3021	41.4168	0.311774	0.643227	0.76998	-1.29874	57.3021	74.4203
ENSG00000223959	AFG3L1P	0.223077	0.995699	1.48585	1.48585	40.3555	27.1599	0.634053	0.909656	1.26881	1.26881	40.3555	31.8056	0.848745	0.950614	1.0656	1.0656	40.3555	37.8712
ENSG00000146729	NIPSNAP2	0.223711	0.995699	0.767434	-1.30304	41.4916	54.0654	0.279707	0.760636	0.697534	-1.43362	41.4916	59.4833	0.873838	0.962143	1.03734	1.03734	41.4916	39.9982
ENSG00000226221	RPL26P19	0.224005	0.995699	0.776413	-1.28797	794.74	1023.6	3.98628e-05	0.0698561	0.266541	-3.75177	794.74	2981.68	0.00303227	0.0568648	0.527243	-1.89666	794.74	1507.35
ENSG00000204977	TRIM13	0.224106	0.995699	1.28312	1.28312	146.934	114.513	0.00312389	0.160759	2.59807	2.59807	146.934	56.555	0.237943	0.566801	1.28507	1.28507	146.934	114.34
ENSG00000136732	GYPC	0.224143	0.995699	0.709106	-1.41023	218.854	308.634	0.344803	0.799577	0.661439	-1.51186	218.854	330.876	0.0431037	0.246988	0.552669	-1.8094	218.854	395.995
ENSG00000178904	DPY19L3	0.224233	0.995699	1.53853	1.53853	21.3013	13.8452	0.00608986	0.207298	5.37424	5.37424	21.3013	3.96359	0.00222685	0.0466999	3.32866	3.32866	21.3013	6.39936
ENSG00000186687	LYRM7	0.224738	0.995699	0.772669	-1.29422	156.541	202.598	0.815754	0.957247	1.07982	1.07982	156.541	144.969	0.475133	0.765419	1.17175	1.17175	156.541	133.596
ENSG00000116771	AGMAT	0.224868	0.995699	1.32259	1.32259	32.8397	24.8299	0.160406	0.696725	0.618715	-1.61625	32.8397	53.0772	0.99209	0.997605	0.997675	-1.00233	32.8397	32.9162
ENSG00000106105	GARS1	0.225057	0.995699	1.45704	1.45704	59.8567	41.0811	0.713676	0.934449	1.19165	1.19165	59.8567	50.2303	0.879978	0.964547	1.04937	1.04937	59.8567	57.0407
ENSG00000076513	ANKRD13A	0.225218	0.995699	0.860461	-1.16217	87.4651	101.649	0.0445319	0.471992	0.685793	-1.45817	87.4651	127.539	0.611452	0.836105	0.936314	-1.06802	87.4651	93.4143
ENSG00000110711	AIP	0.225366	0.995699	0.748028	-1.33685	25.3727	33.9194	0.0764604	0.575136	0.526691	-1.89865	25.3727	48.1737	0.0236856	0.18044	0.575188	-1.73856	25.3727	44.112
ENSG00000109929	SC5D	0.225446	0.995699	1.35022	1.35022	62.022	45.9346	0.0156396	0.297102	2.58993	2.58993	62.022	23.9474	0.0556403	0.280555	1.63805	1.63805	62.022	37.8634
ENSG00000236088	COX10-AS1	0.225636	0.995699	0.698381	-1.43188	60.6772	86.8827	0.186708	0.710292	1.85084	1.85084	60.6772	32.7837	0.832589	0.944603	1.06752	1.06752	60.6772	56.8392
ENSG00000129355	CDKN2D	0.225811	0.995699	0.646702	-1.54631	132.326	204.616	0.0777434	0.575366	0.374975	-2.66685	132.326	352.893	0.144193	0.450882	0.579657	-1.72516	132.326	228.283
ENSG00000213593	TMX2	0.22595	0.995699	1.33304	1.33304	45.7528	34.3222	0.427835	0.832061	0.752321	-1.32922	45.7528	60.8155	0.868849	0.959176	0.960787	-1.04081	45.7528	47.6201
ENSG00000091039	OSBPL8	0.22631	0.995699	1.26276	1.26276	306.344	242.599	0.831927	0.960503	0.938788	-1.0652	306.344	326.318	0.0835063	0.345786	1.41514	1.41514	306.344	216.475
ENSG00000181852	RNF41	0.226662	0.995699	0.785151	-1.27364	50.9217	64.856	0.910039	0.977578	0.965581	-1.03565	50.9217	52.7369	0.0626755	0.297316	1.51315	1.51315	50.9217	33.6527
ENSG00000107290	SETX	0.22667	0.995699	1.25225	1.25225	288.163	230.117	0.122791	0.647834	1.56123	1.56123	288.163	184.574	0.0489992	0.262568	1.4631	1.4631	288.163	196.954
ENSG00000119969	HELLS	0.226777	0.995699	1.23175	1.23175	118.827	96.4704	0.286724	0.762901	1.32893	1.32893	118.827	89.416	0.000379318	0.0174761	1.92988	1.92988	118.827	61.5723
ENSG00000113761	ZNF346	0.226834	0.995699	0.787689	-1.26954	31.7445	40.3008	0.545288	0.881247	0.832402	-1.20134	31.7445	38.1361	0.172623	0.489823	0.758192	-1.31893	31.7445	41.8687
ENSG00000142634	EFHD2	0.22691	0.995699	1.5419	1.5419	35.7577	23.1907	0.928841	0.982791	1.05023	1.05023	35.7577	34.0476	0.247616	0.576314	1.53793	1.53793	35.7577	23.2505
ENSG00000153140	CETN3	0.226969	0.995699	1.35245	1.35245	199.16	147.258	0.849617	0.963367	0.929499	-1.07585	199.16	214.266	0.905889	0.973459	1.03104	1.03104	199.16	193.165
ENSG00000122034	GTF3A	0.227106	0.995699	0.757617	-1.31993	226.907	299.501	0.145022	0.679713	0.596036	-1.67775	226.907	380.693	0.241516	0.570953	0.756299	-1.32223	226.907	300.023
ENSG00000227615	---	0.227229	0.995699	0.768077	-1.30195	457.207	595.262	0.000187383	0.0698561	0.283361	-3.52907	457.207	1613.51	0.000741677	0.0238437	0.4657	-2.1473	457.207	981.762
ENSG00000172058	SERF1A	0.227659	0.995699	0.788538	-1.26817	24.2932	30.8079	0.283532	0.760636	0.725834	-1.37773	24.2932	33.4694	0.0350648	0.222555	0.656308	-1.52368	24.2932	37.015
ENSG00000087111	PIGS	0.227789	0.995699	0.732933	-1.36438	33.971	46.3494	0.0850313	0.597261	0.508597	-1.96619	33.971	66.7937	0.00895756	0.105952	0.501691	-1.99326	33.971	67.7131
ENSG00000264364	DYNLL2	0.227799	0.995699	0.786287	-1.2718	115.662	147.099	0.00852738	0.233094	0.44752	-2.23454	115.662	258.452	0.0158429	0.141738	0.608458	-1.6435	115.662	190.091
ENSG00000155545	MIER3	0.227807	0.995699	1.32131	1.32131	26.7353	20.2339	0.424181	0.831134	1.32924	1.32924	26.7353	20.1132	0.628945	0.846746	1.11993	1.11993	26.7353	23.8722
ENSG00000166532	RIMKLB	0.227875	0.995699	1.34372	1.34372	29.0082	21.5879	0.113454	0.636173	1.84612	1.84612	29.0082	15.7131	0.135276	0.436087	1.46086	1.46086	29.0082	19.8569
ENSG00000173960	UBXN2A	0.227904	0.995699	0.785527	-1.27303	70.1142	89.2575	0.0751476	0.574443	1.7605	1.7605	70.1142	39.8262	0.77696	0.917271	1.06099	1.06099	70.1142	66.0836
ENSG00000132604	TERF2	0.228286	0.995699	0.810602	-1.23365	59.3451	73.2111	0.604306	0.901684	0.870098	-1.1493	59.3451	68.2051	0.464539	0.756265	1.14536	1.14536	59.3451	51.8135
ENSG00000198730	CTR9	0.228911	0.995699	1.2316	1.2316	167.737	136.194	0.655092	0.915877	1.12671	1.12671	167.737	148.873	0.163461	0.479753	1.28446	1.28446	167.737	130.589
ENSG00000155363	MOV10	0.229133	0.995699	0.746424	-1.33972	16.5805	22.2132	0.318514	0.78767	1.48387	1.48387	16.5805	11.1738	0.246115	0.575131	1.36864	1.36864	16.5805	12.1146
ENSG00000180953	ST20	0.229149	0.995699	1.56382	1.56382	19.1071	12.2182	0.193014	0.718443	2.1432	2.1432	19.1071	8.9152	0.24279	0.572089	1.56478	1.56478	19.1071	12.2107
ENSG00000131467	PSME3	0.229323	0.995699	0.753908	-1.32642	41.9484	55.6413	0.218333	0.734164	0.642095	-1.5574	41.9484	65.3306	0.0376799	0.232803	0.605373	-1.65187	41.9484	69.2936
ENSG00000105677	TMEM147	0.230003	0.995699	0.776471	-1.28788	48.8781	62.949	0.275375	0.760636	0.702965	-1.42255	48.8781	69.5313	0.348472	0.677154	0.814651	-1.22752	48.8781	59.9988
ENSG00000271383	NBPF19	0.230017	0.995699	0.735327	-1.35994	109.691	149.173	0.778853	0.945465	1.11816	1.11816	109.691	98.0997	0.919775	0.979008	0.973519	-1.0272	109.691	112.675
ENSG00000226950	DANCR	0.230964	0.995699	1.27829	1.27829	37.5347	29.3633	0.224255	0.737987	0.690256	-1.44874	37.5347	54.378	0.949795	0.985682	1.01325	1.01325	37.5347	37.044
ENSG00000139182	CLSTN3	0.231186	0.995699	1.44092	1.44092	41.555	28.8391	0.152116	0.686753	1.981	1.981	41.555	20.9767	0.361477	0.686465	1.33244	1.33244	41.555	31.1872
ENSG00000247828	TMEM161B-DT	0.231209	0.995699	1.30656	1.30656	162.815	124.613	0.380909	0.817243	1.35377	1.35377	162.815	120.267	0.178368	0.495551	1.36586	1.36586	162.815	119.203
ENSG00000121741	ZMYM2	0.231746	0.995699	1.24428	1.24428	156.707	125.943	0.0728201	0.566427	1.66595	1.66595	156.707	94.065	0.00298768	0.0565726	1.76681	1.76681	156.707	88.6952
ENSG00000137871	ZNF280D	0.231872	0.995699	1.26527	1.26527	76.0496	60.1054	0.350908	0.802906	1.3283	1.3283	76.0496	57.2534	0.153234	0.465509	1.33827	1.33827	76.0496	56.8267
ENSG00000165832	TRUB1	0.232661	0.995699	0.637857	-1.56775	52.6214	82.4971	0.967402	0.989557	1.02419	1.02419	52.6214	51.3785	0.790923	0.923138	0.901257	-1.10956	52.6214	58.3866
ENSG00000126773	PCNX4	0.232837	0.995699	1.2014	1.2014	229.983	191.43	0.0210833	0.343617	1.73864	1.73864	229.983	132.278	0.0223114	0.173365	1.44113	1.44113	229.983	159.585
ENSG00000115325	DOK1	0.233447	0.995699	0.758673	-1.31809	24.2074	31.9075	0.84206	0.963204	0.930939	-1.07418	24.2074	26.0032	0.302786	0.635395	0.781534	-1.27953	24.2074	30.9742
ENSG00000008311	AASS	0.233551	0.995699	1.43148	1.43148	29.5111	20.6158	0.0679266	0.552101	2.40075	2.40075	29.5111	12.2924	0.0764522	0.327643	1.74453	1.74453	29.5111	16.9163
ENSG00000161970	RPL26	0.23374	0.995699	0.741667	-1.34831	2179.44	2938.57	0.0490354	0.48854	0.465312	-2.1491	2179.44	4683.83	0.107199	0.391447	0.657251	-1.52149	2179.44	3316
ENSG00000153767	GTF2E1	0.234006	0.995699	1.27289	1.27289	28.5614	22.4382	0.724672	0.935277	1.1147	1.1147	28.5614	25.6224	0.375713	0.695444	0.836466	-1.19551	28.5614	34.1453
ENSG00000100296	THOC5	0.234091	0.995699	0.702464	-1.42356	56.4153	80.3107	0.414719	0.830537	1.46049	1.46049	56.4153	38.6276	0.412758	0.726797	0.777035	-1.28694	56.4153	72.6033
ENSG00000113580	NR3C1	0.234329	0.995699	1.24533	1.24533	259.485	208.366	0.289849	0.765736	1.35312	1.35312	259.485	191.768	0.0863515	0.353976	1.38901	1.38901	259.485	186.814
ENSG00000146414	SHPRH	0.234336	0.995699	1.39779	1.39779	196.538	140.606	0.332668	0.793493	1.52596	1.52596	196.538	128.796	0.308784	0.641121	1.34597	1.34597	196.538	146.019
ENSG00000279529	---	0.23443	0.995699	0.726487	-1.37649	35.3516	48.661	0.900647	0.973133	0.949293	-1.05342	35.3516	37.2399	0.736588	0.897721	1.10022	1.10022	35.3516	32.1313
ENSG00000204186	ZDBF2	0.234587	0.995699	1.36286	1.36286	78.4625	57.5717	0.006774	0.216102	3.06846	3.06846	78.4625	25.5706	0.0921951	0.3635	1.57759	1.57759	78.4625	49.7358
ENSG00000162384	CZIB	0.234792	0.995699	0.737263	-1.35637	31.3293	42.4941	0.651158	0.914748	0.836064	-1.19608	31.3293	37.4724	0.0703468	0.312291	0.620552	-1.61147	31.3293	50.4862
ENSG00000137409	MTCH1	0.235385	0.995699	0.744953	-1.34237	120.089	161.203	0.770079	0.944202	0.893789	-1.11883	120.089	134.359	0.321392	0.651808	0.774785	-1.29068	120.089	154.996
ENSG00000103995	CEP152	0.236383	0.995699	1.28707	1.28707	129.874	100.907	0.0455067	0.472656	1.94567	1.94567	129.874	66.7504	0.034432	0.221143	1.59873	1.59873	129.874	81.2358
ENSG00000172965	MIR4435-2HG	0.23654	0.995699	1.32076	1.32076	182.62	138.27	0.350722	0.802906	0.713515	-1.40151	182.62	255.945	0.48224	0.768221	0.843226	-1.18592	182.62	216.573
ENSG00000101391	CDK5RAP1	0.236831	0.995699	0.705907	-1.41662	59.4293	84.1886	0.280128	0.760636	1.64691	1.64691	59.4293	36.0854	0.0742973	0.321772	1.75715	1.75715	59.4293	33.8214
ENSG00000050344	NFE2L3	0.237124	0.995699	1.41287	1.41287	33.5759	23.7644	0.10979	0.636173	2.08971	2.08971	33.5759	16.0673	0.041316	0.243195	1.87153	1.87153	33.5759	17.9403
ENSG00000138768	USO1	0.237295	0.995699	1.31316	1.31316	64.2764	48.9478	0.828083	0.960175	1.07987	1.07987	64.2764	59.5223	0.236501	0.565263	1.32707	1.32707	64.2764	48.435
ENSG00000163312	HELQ	0.237356	0.995699	1.34576	1.34576	30.4924	22.6581	0.917289	0.979902	0.961246	-1.04032	30.4924	31.7218	0.853103	0.952386	1.04846	1.04846	30.4924	29.083
ENSG00000100764	PSMC1	0.237415	0.995699	1.27726	1.27726	85.8352	67.2028	0.815305	0.957132	0.928588	-1.0769	85.8352	92.4362	0.596103	0.829341	0.893621	-1.11904	85.8352	96.0532
ENSG00000143870	PDIA6	0.237757	0.995699	1.30776	1.30776	163.111	124.726	0.314147	0.785451	1.42523	1.42523	163.111	114.446	0.0552249	0.28018	1.57374	1.57374	163.111	103.645
ENSG00000135999	EPC2	0.237841	0.995699	1.29682	1.29682	80.9503	62.4221	0.110784	0.636173	1.72941	1.72941	80.9503	46.8081	0.200071	0.526831	1.33907	1.33907	80.9503	60.4529
ENSG00000134987	WDR36	0.238065	0.995699	1.2729	1.2729	37.538	29.4902	0.261722	0.756082	1.42859	1.42859	37.538	26.2762	0.0211619	0.17102	1.65266	1.65266	37.538	22.7137
ENSG00000122873	CISD1	0.238238	0.995699	1.3983	1.3983	42.1927	30.1742	0.793892	0.951661	1.12063	1.12063	42.1927	37.6509	0.219459	0.548039	1.43689	1.43689	42.1927	29.3638
ENSG00000091164	TXNL1	0.238306	0.995699	1.27149	1.27149	62.9507	49.5095	0.946545	0.985168	0.979358	-1.02108	62.9507	64.2775	0.105813	0.388742	1.4118	1.4118	62.9507	44.589
ENSG00000205758	CRYZL1	0.238432	0.995699	1.33709	1.33709	78.6824	58.846	0.513142	0.864837	1.2825	1.2825	78.6824	61.3506	0.210964	0.540776	1.37649	1.37649	78.6824	57.1618
ENSG00000011243	AKAP8L	0.23893	0.995699	1.46002	1.46002	125.539	85.9845	0.27362	0.760636	1.7256	1.7256	125.539	72.7508	0.636472	0.852076	1.17018	1.17018	125.539	107.282
ENSG00000198920	KIAA0753	0.239193	0.995699	0.69744	-1.43382	17.9179	25.6909	0.39233	0.823825	1.52064	1.52064	17.9179	11.7831	0.536228	0.795591	1.22462	1.22462	17.9179	14.6313
ENSG00000147654	EBAG9	0.239394	0.995699	1.35912	1.35912	72.8768	53.6206	0.771219	0.944267	0.890266	-1.12326	72.8768	81.8596	0.314917	0.645478	1.31251	1.31251	72.8768	55.525
ENSG00000126561	STAT5A	0.239711	0.995699	1.27566	1.27566	135.405	106.145	0.436464	0.833814	1.28295	1.28295	135.405	105.541	0.670838	0.867036	1.09511	1.09511	135.405	123.644
ENSG00000125447	GGA3	0.239722	0.995699	0.793425	-1.26036	61.3763	77.3561	0.54874	0.88237	1.2025	1.2025	61.3763	51.0404	0.195419	0.519882	0.768665	-1.30096	61.3763	79.8479
ENSG00000168813	ZNF507	0.239733	0.995699	0.819234	-1.22065	58.6376	71.5761	0.298762	0.772451	1.32013	1.32013	58.6376	44.418	0.144487	0.451358	1.3032	1.3032	58.6376	44.9952
ENSG00000136628	EPRS1	0.239785	0.995699	1.24891	1.24891	168.692	135.072	0.715923	0.934806	1.11201	1.11201	168.692	151.701	0.0395357	0.237987	1.50124	1.50124	168.692	112.369
ENSG00000103266	STUB1	0.239836	0.995699	0.646422	-1.54698	23.7577	36.7526	0.371742	0.815241	0.600394	-1.66557	23.7577	39.5702	0.401946	0.718102	0.723667	-1.38185	23.7577	32.8296
ENSG00000174796	THAP6	0.239913	0.995699	1.43406	1.43406	37.1825	25.9282	0.523517	0.868098	1.3522	1.3522	37.1825	27.4977	0.139969	0.443137	1.60282	1.60282	37.1825	23.1982
ENSG00000224578	HNRNPA1P48	0.240049	0.995699	0.743658	-1.34471	79.4852	106.884	0.00881128	0.23758	0.363312	-2.75246	79.4852	218.78	0.0376634	0.232803	0.581571	-1.71948	79.4852	136.673
ENSG00000171130	ATP6V0E2	0.240108	0.995699	0.760081	-1.31565	18.8858	24.8471	0.466946	0.847188	1.31231	1.31231	18.8858	14.3913	0.430755	0.734919	1.22107	1.22107	18.8858	15.4666
ENSG00000152942	RAD17	0.240155	0.995699	0.76417	-1.30861	82.9596	108.562	0.609072	0.902181	1.2	1.2	82.9596	69.1327	0.993198	0.997803	1.00204	1.00204	82.9596	82.7911
ENSG00000150347	ARID5B	0.240217	0.995699	1.20491	1.20491	280.402	232.716	0.0327291	0.410895	1.69446	1.69446	280.402	165.481	0.0203302	0.166367	1.46663	1.46663	280.402	191.187
ENSG00000167699	GLOD4	0.240253	0.995699	0.785729	-1.2727	49.0388	62.4118	0.368103	0.812444	0.752982	-1.32805	49.0388	65.1262	0.317204	0.647398	0.808401	-1.23701	49.0388	60.6615
ENSG00000156467	UQCRB	0.240453	0.995699	0.809786	-1.23489	1219.4	1505.82	0.00181008	0.12035	0.419981	-2.38106	1219.4	2903.45	0.0269843	0.194581	0.661974	-1.51063	1219.4	1842.06
ENSG00000033800	PIAS1	0.24058	0.995699	1.32539	1.32539	236.743	178.621	0.506433	0.861265	1.27991	1.27991	236.743	184.968	0.208142	0.537999	1.36822	1.36822	236.743	173.03
ENSG00000203880	PCMTD2	0.240744	0.995699	0.748666	-1.33571	208.393	278.352	0.995395	0.999702	1.00221	1.00221	208.393	207.933	0.648162	0.858401	0.88965	-1.12404	208.393	234.241
ENSG00000144747	TMF1	0.240908	0.995699	1.22993	1.22993	220.305	179.119	0.237661	0.745985	1.38112	1.38112	220.305	159.512	0.0415158	0.243195	1.45387	1.45387	220.305	151.53
ENSG00000156639	ZFAND3	0.241094	0.995699	0.678121	-1.47466	63.1729	93.1587	0.98326	0.995855	0.989272	-1.01084	63.1729	63.8579	0.39967	0.715785	1.34262	1.34262	63.1729	47.0519
ENSG00000096092	TMEM14A	0.241295	0.995699	1.52724	1.52724	34.9156	22.8619	0.592043	0.897752	0.744672	-1.34287	34.9156	46.8872	0.0238408	0.18069	2.5525	2.5525	34.9156	13.679
ENSG00000090447	TFAP4	0.241336	0.995699	0.751801	-1.33014	15.9054	21.1564	0.212947	0.733853	0.632955	-1.57989	15.9054	25.1288	0.000706601	0.0229685	0.438219	-2.28196	15.9054	36.2955
ENSG00000115825	PRKD3	0.24146	0.995699	1.30992	1.30992	86.5241	66.0532	0.169155	0.703071	1.63695	1.63695	86.5241	52.8568	0.0190212	0.159904	1.76226	1.76226	86.5241	49.0984
ENSG00000114030	KPNA1	0.241537	0.995699	1.32334	1.32334	113.663	85.8907	0.0497179	0.491816	2.08241	2.08241	113.663	54.5824	0.00791981	0.0975553	1.94526	1.94526	113.663	58.4306
ENSG00000171109	MFN1	0.24188	0.995699	1.28878	1.28878	94.4954	73.3217	0.114091	0.636363	1.70526	1.70526	94.4954	55.4142	0.0545339	0.277562	1.54318	1.54318	94.4954	61.2341
ENSG00000047365	ARAP2	0.24197	0.995699	1.20959	1.20959	154.234	127.51	0.0114662	0.261045	1.90536	1.90536	154.234	80.9474	0.147956	0.456829	1.27594	1.27594	154.234	120.879
ENSG00000198846	TOX	0.242129	0.995699	1.23731	1.23731	125.72	101.608	0.547394	0.881791	1.18414	1.18414	125.72	106.17	0.74695	0.90313	1.0624	1.0624	125.72	118.336
ENSG00000068724	TTC7A	0.242235	0.995699	1.2714	1.2714	27.0001	21.2365	0.986017	0.995918	0.994598	-1.00543	27.0001	27.1468	0.497764	0.771093	1.15281	1.15281	27.0001	23.4212
ENSG00000047579	DTNBP1	0.242327	0.995699	1.33934	1.33934	53.6683	40.0708	0.854721	0.963367	1.07268	1.07268	53.6683	50.0319	0.326644	0.654742	0.778907	-1.28385	53.6683	68.902
ENSG00000220848	RPS18P9	0.242413	0.995699	0.686495	-1.45668	127.645	185.938	0.00658313	0.212806	0.259565	-3.8526	127.645	491.766	0.0321411	0.212976	0.489323	-2.04364	127.645	260.861
ENSG00000184588	PDE4B	0.242762	0.995699	1.29814	1.29814	135.556	104.424	0.569839	0.888653	1.21666	1.21666	135.556	111.417	0.131063	0.43058	1.41972	1.41972	135.556	95.4807
ENSG00000235106	BRD3OS	0.242817	0.995699	1.52457	1.52457	11.8568	7.77713	0.72523	0.935277	1.21214	1.21214	11.8568	9.78176	0.315948	0.645882	1.45162	1.45162	11.8568	8.168
ENSG00000198917	SPOUT1	0.24291	0.995699	1.4699	1.4699	155.048	105.482	0.0857842	0.597362	2.41528	2.41528	155.048	64.1945	0.342489	0.670874	1.38349	1.38349	155.048	112.07
ENSG00000126524	SBDS	0.243055	0.995699	0.699013	-1.43059	107.238	153.413	0.316279	0.785451	0.621867	-1.60806	107.238	172.445	0.995362	0.998231	1.00186	1.00186	107.238	107.038
ENSG00000100836	PABPN1	0.243074	0.995699	0.799404	-1.25093	384.4	480.859	0.244178	0.747219	0.707929	-1.41257	384.4	542.993	0.00800431	0.0983891	0.590416	-1.69372	384.4	651.067
ENSG00000185862	EVI2B	0.243213	0.995699	0.771101	-1.29685	179.382	232.631	0.0755118	0.574538	0.542975	-1.8417	179.382	330.369	0.907394	0.973801	1.02745	1.02745	179.382	174.589
ENSG00000141759	TXNL4A	0.24324	0.995699	1.25066	1.25066	82.5147	65.9771	0.612707	0.904149	1.1611	1.1611	82.5147	71.066	0.494164	0.769118	0.87464	-1.14333	82.5147	94.3412
ENSG00000105618	PRPF31	0.243346	0.995699	0.775326	-1.28978	28.2603	36.4496	0.7017	0.931483	0.879085	-1.13755	28.2603	32.1474	0.96241	0.988472	0.989225	-1.01089	28.2603	28.5682
ENSG00000176142	TMEM39A	0.2434	0.995699	1.45497	1.45497	57.5857	39.5785	0.460148	0.842947	1.44362	1.44362	57.5857	39.8899	0.824886	0.940602	1.07597	1.07597	57.5857	53.52
ENSG00000197102	DYNC1H1	0.243703	0.995699	0.769166	-1.30011	702.576	913.426	0.256783	0.750844	1.48591	1.48591	702.576	472.827	0.920514	0.979107	0.976943	-1.0236	702.576	719.158
ENSG00000205571	SMN2	0.243753	0.995699	0.682361	-1.4655	30.1909	44.2448	0.775284	0.945308	1.15732	1.15732	30.1909	26.0869	0.286246	0.617333	1.45913	1.45913	30.1909	20.691
ENSG00000182463	TSHZ2	0.244009	0.995699	1.87428	1.87428	349.556	186.501	0.0123301	0.270276	8.18314	8.18314	349.556	42.7167	0.0690597	0.310585	2.7698	2.7698	349.556	126.203
ENSG00000149577	SIDT2	0.244095	0.995699	0.688028	-1.45343	16.7499	24.3448	0.290358	0.766644	0.595575	-1.67905	16.7499	28.124	0.0220379	0.172474	0.472017	-2.11857	16.7499	35.4858
ENSG00000233008	LINC01725	0.244682	0.995699	1.62959	1.62959	43.6323	26.7749	0.00616474	0.207298	6.53742	6.53742	43.6323	6.67424	0.0405406	0.241551	2.46483	2.46483	43.6323	17.7019
ENSG00000134086	VHL	0.244749	0.995699	0.814694	-1.22746	254.123	311.924	0.823749	0.959728	0.941058	-1.06263	254.123	270.039	0.488246	0.768843	0.880983	-1.1351	254.123	288.453
ENSG00000086062	B4GALT1	0.244882	0.995699	1.27101	1.27101	64.396	50.6651	0.193662	0.719008	0.666714	-1.49989	64.396	96.5871	0.238368	0.567177	0.78086	-1.28064	64.396	82.4681
ENSG00000115204	MPV17	0.24592	0.995699	0.722546	-1.384	31.8871	44.1316	0.626086	0.909656	0.810059	-1.23448	31.8871	39.3639	0.671661	0.867143	0.883521	-1.13183	31.8871	36.0909
ENSG00000171121	KCNMB3	0.246033	0.995699	1.6142	1.6142	29.6418	18.3631	0.0868636	0.598733	3.06762	3.06762	29.6418	9.6628	0.106851	0.390986	2.00032	2.00032	29.6418	14.8185
ENSG00000166557	TMED3	0.246225	0.995699	0.777124	-1.2868	23.1417	29.7786	0.760597	0.942308	0.90272	-1.10776	23.1417	25.6355	0.161531	0.477253	0.732019	-1.36608	23.1417	31.6135
ENSG00000106546	AHR	0.24632	0.995699	1.22737	1.22737	122.442	99.759	0.380651	0.817243	1.27064	1.27064	122.442	96.3622	0.0625841	0.297316	1.40873	1.40873	122.442	86.9161
ENSG00000160208	RRP1B	0.246922	0.995699	0.859284	-1.16376	117.408	136.634	0.752253	0.940075	1.06627	1.06627	117.408	110.111	0.903735	0.973266	0.983667	-1.0166	117.408	119.357
ENSG00000159202	UBE2Z	0.247008	0.995699	1.21205	1.21205	205.455	169.51	0.161459	0.697706	1.43452	1.43452	205.455	143.223	0.276495	0.607728	1.20581	1.20581	205.455	170.387
ENSG00000288965	---	0.24705	0.995699	1.28463	1.28463	66.3346	51.637	0.0117849	0.26419	2.38086	2.38086	66.3346	27.8616	0.0178901	0.154058	1.70977	1.70977	66.3346	38.7973
ENSG00000168887	C2orf68	0.247434	0.995699	1.23956	1.23956	103.49	83.4895	0.189335	0.713442	1.45996	1.45996	103.49	70.8853	0.0627052	0.297316	1.43279	1.43279	103.49	72.2296
ENSG00000122862	SRGN	0.247759	0.995699	1.30851	1.30851	405.38	309.802	0.227244	0.740644	0.648062	-1.54306	405.38	625.526	0.706973	0.883539	1.09496	1.09496	405.38	370.224
ENSG00000183691	NOG	0.247776	0.995699	1.27733	1.27733	172.798	135.281	0.440406	0.834322	1.28758	1.28758	172.798	134.204	0.644929	0.858252	0.904204	-1.10595	172.798	191.105
ENSG00000135837	CEP350	0.248165	0.995699	1.20151	1.20151	464.147	386.304	0.163063	0.697991	1.41011	1.41011	464.147	329.156	0.105092	0.387458	1.30654	1.30654	464.147	355.25
ENSG00000125877	ITPA	0.248742	0.995699	0.707942	-1.41254	61.7673	87.249	0.54057	0.878577	0.75338	-1.32735	61.7673	81.9869	0.260465	0.589093	0.705245	-1.41795	61.7673	87.5827
ENSG00000143314	MRPL24	0.249038	0.995699	0.772109	-1.29515	45.3204	58.6969	0.231637	0.743971	0.662957	-1.50839	45.3204	68.3609	0.515226	0.7824	0.858903	-1.16428	45.3204	52.7654
ENSG00000176208	ATAD5	0.249119	0.995699	1.40667	1.40667	48.66	34.5923	0.27685	0.760636	1.64895	1.64895	48.66	29.5096	0.00316503	0.0577804	2.60738	2.60738	48.66	18.6624
ENSG00000155621	C9orf85	0.249371	0.995699	1.29372	1.29372	23.6364	18.2701	0.072073	0.563613	1.90998	1.90998	23.6364	12.3752	0.000209231	0.0127304	3.32289	3.32289	23.6364	7.1132
ENSG00000188021	UBQLN2	0.249494	0.995699	0.798908	-1.25171	116.929	146.361	0.537297	0.877226	0.830488	-1.20411	116.929	140.796	0.644814	0.858252	0.910819	-1.09791	116.929	128.378
ENSG00000109906	ZBTB16	0.249778	0.995699	0.667997	-1.49701	67.8065	101.507	0.137661	0.667318	0.448172	-2.23128	67.8065	151.296	0.0279105	0.196947	0.450478	-2.21986	67.8065	150.521
ENSG00000006715	VPS41	0.249791	0.995699	1.33573	1.33573	71.4749	53.51	0.252005	0.749787	1.5641	1.5641	71.4749	45.6972	0.0131412	0.130321	1.9324	1.9324	71.4749	36.9875
ENSG00000261824	LINC00662	0.250075	0.995699	1.39643	1.39643	74.1982	53.1342	0.119104	0.644679	2.02603	2.02603	74.1982	36.6225	0.000409936	0.0181707	3.08306	3.08306	74.1982	24.0664
ENSG00000140264	SERF2	0.250167	0.995699	1.52698	1.52698	440.619	288.556	0.424994	0.831134	0.634923	-1.57499	440.619	693.972	0.80325	0.928706	1.09981	1.09981	440.619	400.63
ENSG00000163636	PSMD6	0.250214	0.995699	1.2035	1.2035	183.267	152.278	0.536655	0.876751	1.16613	1.16613	183.267	157.158	0.0958152	0.369039	1.32158	1.32158	183.267	138.672
ENSG00000174197	MGA	0.250474	0.995699	1.46849	1.46849	160.554	109.333	0.404025	0.827997	1.54053	1.54053	160.554	104.22	0.282859	0.612746	1.4512	1.4512	160.554	110.636
ENSG00000112406	HECA	0.250624	0.995699	0.784886	-1.27407	274.155	349.293	0.810898	0.95541	0.924854	-1.08125	274.155	296.431	0.813382	0.934337	0.949603	-1.05307	274.155	288.705
ENSG00000116044	NFE2L2	0.25072	0.995699	1.30117	1.30117	288.139	221.447	0.0388157	0.436751	2.08853	2.08853	288.139	137.963	0.0389707	0.236533	1.63521	1.63521	288.139	176.208
ENSG00000251022	THAP9-AS1	0.25086	0.995699	1.38131	1.38131	48.2212	34.9098	0.79905	0.953129	1.11624	1.11624	48.2212	43.1996	0.056167	0.282125	1.76464	1.76464	48.2212	27.3263
ENSG00000184575	XPOT	0.250955	0.995699	1.27355	1.27355	42.607	33.4552	0.239775	0.745985	1.46987	1.46987	42.607	28.9869	0.443554	0.742345	1.17994	1.17994	42.607	36.1094
ENSG00000179889	PDXDC1	0.251111	0.995699	1.21158	1.21158	143.241	118.227	0.346601	0.800934	1.27565	1.27565	143.241	112.288	0.297506	0.629706	1.19745	1.19745	143.241	119.622
ENSG00000133134	BEX2	0.251177	0.995699	0.718274	-1.39223	52.4239	72.9859	0.14993	0.684144	0.528293	-1.89289	52.4239	99.2325	0.279448	0.610735	0.723482	-1.3822	52.4239	72.4605
ENSG00000178700	DHFR2	0.251334	0.995699	1.30841	1.30841	23.8838	18.254	0.00447324	0.19016	3.14537	3.14537	23.8838	7.59333	0.000243658	0.0137081	2.74052	2.74052	23.8838	8.71506
ENSG00000138398	PPIG	0.25134	0.995699	0.810223	-1.23423	549.745	678.51	0.806274	0.954298	0.932697	-1.07216	549.745	589.414	0.292931	0.625077	0.818572	-1.22164	549.745	671.59
ENSG00000072042	RDH11	0.25149	0.995699	0.836112	-1.19601	157.267	188.093	0.764481	0.943467	1.07524	1.07524	157.267	146.262	0.491804	0.769118	0.894738	-1.11765	157.267	175.768
ENSG00000124942	AHNAK	0.251562	0.995699	0.770312	-1.29818	547.174	710.328	0.58973	0.897036	0.826922	-1.2093	547.174	661.7	0.188407	0.509884	0.732984	-1.36429	547.174	746.501
ENSG00000185950	IRS2	0.251835	0.995699	0.727002	-1.37551	131.414	180.762	0.112874	0.636173	0.506198	-1.97551	131.414	259.611	0.0636967	0.2985	0.585969	-1.70657	131.414	224.268
ENSG00000142347	MYO1F	0.251905	0.995699	0.784439	-1.2748	65.9197	84.0342	0.24698	0.749787	0.686041	-1.45764	65.9197	96.087	0.128226	0.426999	0.716842	-1.39501	65.9197	91.9584
ENSG00000274523	RCC1L	0.251914	0.995699	1.36665	1.36665	15.875	11.616	0.522727	0.868024	1.30646	1.30646	15.875	12.1512	0.93656	0.982135	0.978599	-1.02187	15.875	16.2221
ENSG00000115604	IL18R1	0.251962	0.995699	1.31621	1.31621	36.7356	27.9101	0.267757	0.758882	1.51183	1.51183	36.7356	24.2987	0.00104021	0.0299816	2.48293	2.48293	36.7356	14.7952
ENSG00000183891	TTC32	0.252009	0.995699	0.808304	-1.23716	70.245	86.9042	0.563386	0.887075	0.8475	-1.17994	70.245	82.885	0.262677	0.59048	1.2494	1.2494	70.245	56.2232
ENSG00000174013	FBXO45	0.252069	0.995699	1.36427	1.36427	47.9556	35.151	0.211117	0.731781	1.69603	1.69603	47.9556	28.2752	0.241073	0.570366	1.38921	1.38921	47.9556	34.5201
ENSG00000229336	SREK1IP1P1	0.252435	0.995699	0.78253	-1.27791	53.5019	68.3705	0.0974141	0.619014	0.581273	-1.72036	53.5019	92.0427	0.230097	0.559092	0.76611	-1.30529	53.5019	69.8358
ENSG00000151131	NOPCHAP1	0.252803	0.995699	1.39335	1.39335	57.1424	41.0108	0.566193	0.888387	1.29273	1.29273	57.1424	44.2029	0.720418	0.890403	0.898974	-1.11238	57.1424	63.5641
ENSG00000154814	OXNAD1	0.253108	0.995699	0.709001	-1.41044	233.287	329.037	0.396911	0.824971	0.674002	-1.48368	233.287	346.123	0.584188	0.822917	0.842762	-1.18657	233.287	276.813
ENSG00000220842	RPL21P16	0.253288	0.995699	0.800849	-1.24867	2951.84	3685.89	0.00491287	0.200321	0.428825	-2.33195	2951.84	6883.55	0.0880415	0.356807	0.708758	-1.41092	2951.84	4164.81
ENSG00000117298	ECE1	0.253417	0.995699	0.773812	-1.2923	93.6161	120.98	0.178347	0.705032	1.60606	1.60606	93.6161	58.2893	0.742288	0.900317	0.926163	-1.07972	93.6161	101.08
ENSG00000101040	ZMYND8	0.253572	0.995699	0.82249	-1.21582	156.319	190.056	0.937893	0.982844	1.02088	1.02088	156.319	153.122	0.333448	0.662256	1.18944	1.18944	156.319	131.423
ENSG00000225830	ERCC6	0.253573	0.995699	1.27155	1.27155	75.853	59.6539	0.00893491	0.238128	2.39786	2.39786	75.853	31.6336	0.296506	0.6288	1.25501	1.25501	75.853	60.44
ENSG00000230606	---	0.253582	0.995699	1.29037	1.29037	117.556	91.1022	0.00679589	0.216102	2.59312	2.59312	117.556	45.3338	0.0113614	0.120646	1.80449	1.80449	117.556	65.1463
ENSG00000197779	ZNF81	0.253919	0.995699	0.691517	-1.4461	19.494	28.1902	0.883426	0.96808	0.929045	-1.07637	19.494	20.9829	0.813443	0.934337	0.923169	-1.08323	19.494	21.1164
ENSG00000149084	HSD17B12	0.254019	0.995699	1.42594	1.42594	33.029	23.163	0.33582	0.796235	1.59144	1.59144	33.029	20.7541	0.811596	0.933624	1.07883	1.07883	33.029	30.6156
ENSG00000106588	PSMA2	0.254126	0.995699	1.23362	1.23362	102.36	82.9748	0.191961	0.717677	0.69371	-1.44153	102.36	147.554	0.0481761	0.261	1.47113	1.47113	102.36	69.5787
ENSG00000213371	NAP1L1P3	0.254169	0.995699	1.35169	1.35169	61.1209	45.218	0.806577	0.954298	1.10459	1.10459	61.1209	55.3334	0.425676	0.731038	1.24292	1.24292	61.1209	49.1751
ENSG00000072803	FBXW11	0.254182	0.995699	1.27989	1.27989	41.2803	32.2529	0.53087	0.873733	1.23197	1.23197	41.2803	33.5076	0.000145481	0.010581	3.0096	3.0096	41.2803	13.7162
ENSG00000164975	SNAPC3	0.254352	0.995699	1.32364	1.32364	51.0116	38.539	0.430502	0.832061	1.34937	1.34937	51.0116	37.8039	0.169833	0.485912	1.41976	1.41976	51.0116	35.9298
ENSG00000115486	GGCX	0.254374	0.995699	1.34156	1.34156	35.6708	26.589	0.829157	0.960175	1.08873	1.08873	35.6708	32.7636	0.823552	0.940354	0.943251	-1.06016	35.6708	37.8168
ENSG00000171940	ZNF217	0.254934	0.995699	1.2556	1.2556	110.704	88.1683	0.16746	0.700865	1.53548	1.53548	110.704	72.0973	0.0100264	0.112384	1.71674	1.71674	110.704	64.4849
ENSG00000084112	SSH1	0.255078	0.995699	1.306	1.306	49.0618	37.5664	0.285764	0.761943	1.47494	1.47494	49.0618	33.2636	0.0120584	0.124653	1.87545	1.87545	49.0618	26.1599
ENSG00000130332	LSM7	0.255092	0.995699	1.35206	1.35206	78.9151	58.3665	0.327309	0.79156	0.672356	-1.48731	78.9151	117.371	0.240565	0.569856	1.384	1.384	78.9151	57.0196
ENSG00000173418	NAA20	0.255303	0.995699	1.45266	1.45266	39.3757	27.1059	0.841982	0.963204	0.90486	-1.10514	39.3757	43.5158	0.666153	0.864662	1.15687	1.15687	39.3757	34.0363
ENSG00000242071	RPL7AP6	0.255315	0.995699	0.752752	-1.32846	219.254	291.271	0.00794359	0.231233	0.359595	-2.78091	219.254	609.726	0.100221	0.379663	0.653198	-1.53093	219.254	335.663
ENSG00000015285	WAS	0.255919	0.995699	0.799027	-1.25152	104.93	131.323	0.110368	0.636173	0.616002	-1.62337	104.93	170.341	0.0570066	0.283772	0.678221	-1.47444	104.93	154.714
ENSG00000184164	CRELD2	0.256065	0.995699	1.31817	1.31817	39.5799	30.0264	0.499562	0.859163	1.28798	1.28798	39.5799	30.7302	0.237783	0.566801	0.747674	-1.33748	39.5799	52.9373
ENSG00000131653	TRAF7	0.256355	0.995699	1.40888	1.40888	21.1128	14.9855	0.8329	0.960503	0.908462	-1.10076	21.1128	23.2401	0.803471	0.928706	1.07936	1.07936	21.1128	19.5605
ENSG00000153094	BCL2L11	0.256599	0.995699	1.25856	1.25856	121.51	96.547	0.788197	0.950029	1.08753	1.08753	121.51	111.73	0.171007	0.487173	1.33411	1.33411	121.51	91.0794
ENSG00000181404	WASHC1	0.256756	0.995699	0.63415	-1.57691	13.4974	21.2843	0.816639	0.957364	1.15739	1.15739	13.4974	11.6619	0.85949	0.955152	0.928149	-1.07741	13.4974	14.5423
ENSG00000198673	TAFA2	0.256908	0.995699	1.35631	1.35631	44.3738	32.7165	0.617616	0.904701	1.2294	1.2294	44.3738	36.0938	0.935981	0.982101	1.02234	1.02234	44.3738	43.4039
ENSG00000168090	COPS6	0.257155	0.995699	0.694328	-1.44024	85.5878	123.267	0.722298	0.935277	1.19457	1.19457	85.5878	71.6476	0.70167	0.881729	0.879729	-1.13671	85.5878	97.2887
ENSG00000243317	STMP1	0.257232	0.995699	0.764485	-1.30807	74.14	96.9803	0.0802895	0.584296	0.529203	-1.88963	74.14	140.098	0.232006	0.560512	0.745381	-1.3416	74.14	99.4659
ENSG00000114331	ACAP2	0.257535	0.995699	1.17337	1.17337	212.032	180.704	0.97975	0.995465	1.00553	1.00553	212.032	210.865	0.0875269	0.355886	1.28539	1.28539	212.032	164.956
ENSG00000137815	RTF1	0.25766	0.995699	0.852098	-1.17357	141.479	166.036	0.945079	0.984276	1.0152	1.0152	141.479	139.361	0.0564981	0.283022	0.757333	-1.32042	141.479	186.812
ENSG00000152270	PDE3B	0.257999	0.995699	1.31969	1.31969	562.061	425.904	0.000726275	0.0993677	3.63771	3.63771	562.061	154.509	0.000153714	0.010581	2.63169	2.63169	562.061	213.575
ENSG00000136161	RCBTB2	0.258157	0.995699	0.685529	-1.45873	48.3697	70.5582	0.765656	0.944052	0.857182	-1.16661	48.3697	56.4287	0.939953	0.982659	1.02667	1.02667	48.3697	47.1133
ENSG00000135686	KLHL36	0.258387	0.995699	0.819261	-1.22061	191.061	233.212	0.429307	0.832061	1.24202	1.24202	191.061	153.831	0.396274	0.713854	0.856319	-1.16779	191.061	223.119
ENSG00000144231	POLR2D	0.258448	0.995699	0.786017	-1.27224	54.6129	69.4806	0.963874	0.989209	1.01509	1.01509	54.6129	53.8011	0.362403	0.687351	0.818065	-1.2224	54.6129	66.7586
ENSG00000108306	FBXL20	0.258555	0.995699	0.741729	-1.3482	93.8769	126.565	0.942609	0.983453	1.02997	1.02997	93.8769	91.1453	0.415892	0.726797	0.799987	-1.25002	93.8769	117.348
ENSG00000267379	---	0.258797	0.995699	0.674412	-1.48277	28.7924	42.6926	0.862804	0.965068	0.910761	-1.09798	28.7924	31.6136	0.591863	0.82728	0.823233	-1.21472	28.7924	34.9748
ENSG00000162378	ZYG11B	0.259013	0.995699	1.21594	1.21594	157.907	129.864	0.169923	0.703071	1.4462	1.4462	157.907	109.187	0.0112656	0.1202	1.58269	1.58269	157.907	99.7709
ENSG00000173692	PSMD1	0.259224	0.995699	1.31172	1.31172	217.804	166.045	0.811761	0.956234	1.09254	1.09254	217.804	199.355	0.848379	0.950614	1.04874	1.04874	217.804	207.683
ENSG00000133065	SLC41A1	0.259516	0.995699	1.25901	1.25901	35.3621	28.0873	0.0728969	0.566427	1.78949	1.78949	35.3621	19.761	0.0742578	0.321772	1.46249	1.46249	35.3621	24.1794
ENSG00000169442	CD52	0.259611	0.995699	0.753604	-1.32696	635.905	843.819	0.00215033	0.129169	0.303845	-3.29116	635.905	2092.86	0.0436247	0.248054	0.591278	-1.69125	635.905	1075.47
ENSG00000122958	VPS26A	0.259864	0.995699	1.3611	1.3611	42.8653	31.4931	0.565881	0.888135	1.27383	1.27383	42.8653	33.6507	0.183138	0.501368	1.46007	1.46007	42.8653	29.3584
ENSG00000112234	FBXL4	0.2599	0.995699	1.36038	1.36038	46.8436	34.4342	0.160969	0.696725	1.81928	1.81928	46.8436	25.7484	0.006103	0.0819005	2.23769	2.23769	46.8436	20.9339
ENSG00000056097	ZFR	0.259958	0.995699	1.32499	1.32499	169.08	127.608	0.117528	0.643272	1.8362	1.8362	169.08	92.0812	0.0609249	0.29267	1.62702	1.62702	169.08	103.92
ENSG00000110324	IL10RA	0.259981	0.995699	0.805406	-1.24161	761.548	945.545	0.797374	0.952713	1.07943	1.07943	761.548	705.508	0.791384	0.923231	1.05421	1.05421	761.548	722.387
ENSG00000112624	BICRAL	0.260195	0.995699	1.20279	1.20279	101.404	84.3074	0.462109	0.844292	1.20449	1.20449	101.404	84.1885	0.530837	0.793632	0.900227	-1.11083	101.404	112.642
ENSG00000198252	STYX	0.26021	0.995699	1.22931	1.22931	112.57	91.5716	0.810248	0.95541	1.07009	1.07009	112.57	105.197	0.128782	0.427157	1.33613	1.33613	112.57	84.2511
ENSG00000229153	EPHA1-AS1	0.260228	0.995699	1.24545	1.24545	46.1735	37.0738	0.437264	0.833814	1.26306	1.26306	46.1735	36.5568	0.3993	0.715785	1.18387	1.18387	46.1735	39.0021
ENSG00000197958	RPL12	0.260396	0.995699	0.81209	-1.23139	835.862	1029.27	0.0010102	0.0993677	0.390567	-2.56038	835.862	2140.13	0.0102426	0.113128	0.611052	-1.63652	835.862	1367.91
ENSG00000196591	HDAC2	0.260403	0.995699	1.28854	1.28854	111.009	86.1515	0.925928	0.982117	1.03277	1.03277	111.009	107.487	0.130295	0.429254	1.42606	1.42606	111.009	77.8435
ENSG00000065413	ANKRD44	0.260482	0.995699	0.832509	-1.20119	367.033	440.875	0.738905	0.936216	0.919396	-1.08767	367.033	399.211	0.628768	0.846703	1.08544	1.08544	367.033	338.142
ENSG00000133627	ACTR3B	0.260642	0.995699	1.57761	1.57761	17.2526	10.9359	0.0668877	0.550436	3.35291	3.35291	17.2526	5.14557	0.262694	0.59048	1.59986	1.59986	17.2526	10.7838
ENSG00000106261	ZKSCAN1	0.260725	0.995699	0.773886	-1.29218	253.943	328.14	0.663552	0.920406	1.16626	1.16626	253.943	217.742	0.653592	0.859918	0.899254	-1.11203	253.943	282.393
ENSG00000125304	TM9SF2	0.260773	0.995699	1.25417	1.25417	127.58	101.725	0.792559	0.951039	0.921836	-1.08479	127.58	138.398	0.889893	0.968568	0.971684	-1.02914	127.58	131.298
ENSG00000197343	ZNF655	0.260808	0.995699	0.81671	-1.22442	150.54	184.325	0.924993	0.982117	0.974093	-1.0266	150.54	154.544	0.948801	0.985682	0.988044	-1.0121	150.54	152.362
ENSG00000163606	CD200R1	0.260878	0.995699	0.697348	-1.434	25.2555	36.2165	0.717823	0.935277	1.19887	1.19887	25.2555	21.066	0.487229	0.768843	1.2684	1.2684	25.2555	19.9113
ENSG00000002834	LASP1	0.261124	0.995699	1.30039	1.30039	37.2399	28.6374	0.886961	0.96836	0.950809	-1.05174	37.2399	39.1666	0.416809	0.726797	0.825529	-1.21134	37.2399	45.1104
ENSG00000175029	CTBP2	0.261161	0.995699	0.624565	-1.60111	40.2192	64.3954	0.278418	0.760636	0.496402	-2.0145	40.2192	81.0214	0.0207073	0.168042	4.39343	4.39343	40.2192	9.15438
ENSG00000103657	HERC1	0.261196	0.995699	1.20384	1.20384	337.871	280.66	0.0780933	0.576924	1.5709	1.5709	337.871	215.081	0.0149579	0.137478	1.51911	1.51911	337.871	222.414
ENSG00000068796	KIF2A	0.261428	0.995699	1.27023	1.27023	603.456	475.075	0.155223	0.690063	1.59885	1.59885	603.456	377.431	0.218113	0.547153	1.31285	1.31285	603.456	459.652
ENSG00000107672	NSMCE4A	0.261512	0.995699	0.691211	-1.44674	57.6849	83.4549	0.981011	0.995465	0.987929	-1.01222	57.6849	58.3898	0.778162	0.917764	1.10182	1.10182	57.6849	52.3544
ENSG00000117054	ACADM	0.26158	0.995699	1.28571	1.28571	106.962	83.1931	0.256351	0.750445	1.483	1.483	106.962	72.1254	1.03183e-06	0.000670802	4.00123	4.00123	106.962	26.7323
ENSG00000248727	LINC01948	0.262065	0.995699	0.684326	-1.46129	14.1516	20.6796	0.0791888	0.580619	2.74314	2.74314	14.1516	5.15889	0.340742	0.669246	0.713216	-1.4021	14.1516	19.8419
ENSG00000137038	DMAC1	0.26208	0.995699	1.25132	1.25132	70.5597	56.3883	0.0668553	0.550436	0.575181	-1.73858	70.5597	122.674	0.453874	0.747289	0.858051	-1.16543	70.5597	82.2325
ENSG00000166848	TERF2IP	0.262261	0.995699	0.832859	-1.20068	759.997	912.516	0.75987	0.942308	0.92569	-1.08028	759.997	821.006	0.555819	0.809382	0.90506	-1.1049	759.997	839.72
ENSG00000245970	---	0.262435	0.995699	1.22198	1.22198	189.657	155.205	0.00010757	0.0698561	0.347436	-2.87823	189.657	545.877	0.337145	0.666881	0.837358	-1.19423	189.657	226.495
ENSG00000149970	CNKSR2	0.262568	0.995699	1.2794	1.2794	103.131	80.6093	0.150603	0.684144	1.63511	1.63511	103.131	63.0732	8.34966e-05	0.00729163	2.57819	2.57819	103.131	40.0015
ENSG00000178878	APOLD1	0.262736	0.995699	1.36523	1.36523	87.2238	63.8892	0.334217	0.795243	1.5159	1.5159	87.2238	57.5391	0.123909	0.421262	1.55986	1.55986	87.2238	55.9178
ENSG00000121390	PSPC1	0.262866	0.995699	0.80677	-1.23951	120.947	149.915	0.774518	0.94509	0.918529	-1.0887	120.947	131.674	0.477825	0.76638	0.868321	-1.15165	120.947	139.288
ENSG00000091409	ITGA6	0.2629	0.995699	0.755846	-1.32302	174.222	230.499	0.412659	0.830537	1.37494	1.37494	174.222	126.712	0.903689	0.973266	1.03196	1.03196	174.222	168.827
ENSG00000187764	SEMA4D	0.263142	0.995699	0.745947	-1.34058	255.518	342.541	0.66645	0.92101	0.839619	-1.19102	255.518	304.326	0.3454	0.673197	0.77378	-1.29236	255.518	330.22
ENSG00000198786	MT-ND5	0.263411	0.995699	0.735344	-1.35991	3229.97	4392.46	0.222362	0.737393	1.68167	1.68167	3229.97	1920.69	0.69908	0.881114	0.895551	-1.11663	3229.97	3606.68
ENSG00000183576	SETD3	0.263431	0.995699	0.8076	-1.23824	57.5311	71.2371	0.313164	0.785194	0.744128	-1.34385	57.5311	77.3134	0.185956	0.506284	0.770404	-1.29802	57.5311	74.6765
ENSG00000129472	RAB2B	0.263526	0.995699	1.34532	1.34532	77.5919	57.6753	0.875873	0.966887	1.06585	1.06585	77.5919	72.7978	0.102882	0.384224	1.57177	1.57177	77.5919	49.3658
ENSG00000241343	RPL36A	0.263768	0.995699	0.800682	-1.24894	483.783	604.214	0.00120981	0.106601	0.369921	-2.70328	483.783	1307.8	0.00529955	0.0763736	0.562724	-1.77707	483.783	859.717
ENSG00000135002	RFK	0.263956	0.995699	1.37104	1.37104	64.1474	46.7873	0.783617	0.947688	1.12684	1.12684	64.1474	56.9268	0.0229401	0.177074	1.98168	1.98168	64.1474	32.3702
ENSG00000215252	GOLGA8B	0.2642	0.995699	0.819046	-1.22093	785.612	959.18	0.554887	0.88237	1.17778	1.17778	785.612	667.026	0.394977	0.713493	1.17127	1.17127	785.612	670.737
ENSG00000066084	DIP2B	0.264369	0.995699	0.796123	-1.25609	57.2036	71.8527	0.701491	0.931483	1.12976	1.12976	57.2036	50.6335	0.900738	0.972365	0.973811	-1.02689	57.2036	58.742
ENSG00000143157	POGK	0.264541	0.995699	1.22876	1.22876	59.8463	48.7047	0.101113	0.624183	1.60679	1.60679	59.8463	37.2458	0.0594494	0.289153	1.43728	1.43728	59.8463	41.6385
ENSG00000197312	DDI2	0.264681	0.995699	0.790978	-1.26426	122.874	155.345	0.368356	0.812444	1.34274	1.34274	122.874	91.5104	0.598797	0.830621	1.12227	1.12227	122.874	109.487
ENSG00000189403	HMGB1	0.265013	0.995699	0.846321	-1.18158	1226.43	1449.13	0.141435	0.675458	0.711302	-1.40587	1226.43	1724.2	0.873329	0.961764	0.975514	-1.0251	1226.43	1257.22
ENSG00000127337	YEATS4	0.26537	0.995699	1.24654	1.24654	109.272	87.6602	0.117261	0.643272	0.623431	-1.60403	109.272	175.276	0.552545	0.806621	1.12972	1.12972	109.272	96.7256
ENSG00000275464	---	0.265371	0.995699	1.36906	1.36906	21.0483	15.3743	0.0263729	0.372724	2.82157	2.82157	21.0483	7.4598	0.0445839	0.25131	1.81805	1.81805	21.0483	11.5774
ENSG00000142937	RPS8	0.265664	0.995699	0.81794	-1.22258	4228.61	5169.82	0.000324731	0.0786702	0.366026	-2.73205	4228.61	11552.8	0.00778992	0.0967703	0.607321	-1.64658	4228.61	6962.72
ENSG00000138081	FBXO11	0.265955	0.995699	1.15355	1.15355	262.712	227.743	0.0948845	0.616855	1.39503	1.39503	262.712	188.32	0.000331764	0.0163122	1.6234	1.6234	262.712	161.828
ENSG00000152382	TADA1	0.266379	0.995699	0.75061	-1.33225	50.7289	67.5836	0.824701	0.959937	1.093	1.093	50.7289	46.4125	0.404966	0.72096	0.800339	-1.24947	50.7289	63.3842
ENSG00000048707	VPS13D	0.266432	0.995699	1.1993	1.1993	140.19	116.894	0.0991103	0.623997	1.52144	1.52144	140.19	92.1429	0.23106	0.56036	1.22461	1.22461	140.19	114.477
ENSG00000135018	UBQLN1	0.26686	0.995699	1.30067	1.30067	134.951	103.755	0.410103	0.830537	0.741083	-1.34938	134.951	182.1	0.666128	0.864662	1.11156	1.11156	134.951	121.407
ENSG00000071073	MGAT4A	0.266879	0.995699	0.830901	-1.20351	243.949	293.595	0.948125	0.985168	1.01696	1.01696	243.949	239.88	0.38814	0.706819	1.16216	1.16216	243.949	209.909
ENSG00000135070	ISCA1	0.267006	0.995699	1.29117	1.29117	53.7604	41.6369	0.0298904	0.39729	0.471661	-2.12017	53.7604	113.981	0.559744	0.811104	1.15066	1.15066	53.7604	46.7212
ENSG00000160199	PKNOX1	0.267071	0.995699	1.26973	1.26973	33.1677	26.1218	0.794556	0.951779	1.08914	1.08914	33.1677	30.453	0.000426628	0.0183515	3.06575	3.06575	33.1677	10.8188
ENSG00000203709	MIR29B2CHG	0.267087	0.995699	1.31295	1.31295	70.955	54.0423	0.0216925	0.346762	2.43647	2.43647	70.955	29.122	0.535249	0.795591	1.17013	1.17013	70.955	60.6384
ENSG00000055147	FAM114A2	0.267233	0.995699	1.31084	1.31084	37.1259	28.3222	0.363576	0.808843	1.40955	1.40955	37.1259	26.3389	0.164912	0.481006	1.42158	1.42158	37.1259	26.1159
ENSG00000143252	SDHC	0.267419	0.995699	0.68325	-1.46359	85.5346	125.188	0.118994	0.644679	0.437718	-2.28457	85.5346	195.41	0.100113	0.379625	0.556987	-1.79537	85.5346	153.566
ENSG00000279296	PRAL	0.267482	0.995699	0.738734	-1.35367	199.221	269.679	0.727797	0.935277	0.863138	-1.15856	199.221	230.81	0.721515	0.891382	0.903821	-1.10641	199.221	220.421
ENSG00000251023	---	0.26757	0.995699	1.40811	1.40811	40.3967	28.6886	0.715661	0.934673	1.18872	1.18872	40.3967	33.9834	0.490503	0.769118	1.24522	1.24522	40.3967	32.4414
ENSG00000107938	EDRF1	0.267822	0.995699	1.27983	1.27983	96.6506	75.5182	0.369388	0.81282	1.36256	1.36256	96.6506	70.9332	0.555223	0.808917	1.14518	1.14518	96.6506	84.3974
ENSG00000120694	HSPH1	0.268059	0.995699	1.21718	1.21718	186.916	153.565	0.426898	0.831485	1.24364	1.24364	186.916	150.297	0.0631648	0.297566	1.40932	1.40932	186.916	132.629
ENSG00000109184	DCUN1D4	0.268228	0.995699	1.27511	1.27511	35.0285	27.4711	0.55589	0.88237	1.21971	1.21971	35.0285	28.7188	0.0556609	0.280555	1.56085	1.56085	35.0285	22.442
ENSG00000196914	ARHGEF12	0.268241	0.995699	1.36965	1.36965	60.3368	44.0529	0.096536	0.61871	2.09502	2.09502	60.3368	28.8002	0.135204	0.436087	1.55368	1.55368	60.3368	38.8348
ENSG00000140718	FTO	0.268258	0.995699	1.26606	1.26606	33.2353	26.251	0.763539	0.9433	1.10271	1.10271	33.2353	30.1397	0.111472	0.398038	1.42848	1.42848	33.2353	23.2663
ENSG00000103248	MTHFSD	0.268652	0.995699	0.690476	-1.44828	18.6535	27.0153	0.604201	0.901684	1.31495	1.31495	18.6535	14.1857	0.539187	0.797267	1.246	1.246	18.6535	14.9706
ENSG00000069399	BCL3	0.269115	0.995699	1.40184	1.40184	27.808	19.8369	0.184208	0.710292	1.89096	1.89096	27.808	14.7058	0.710449	0.884572	0.890849	-1.12253	27.808	31.2152
ENSG00000070495	JMJD6	0.269282	0.995699	1.29668	1.29668	23.8406	18.3859	0.664103	0.920406	1.16872	1.16872	23.8406	20.3988	0.716066	0.887085	1.09054	1.09054	23.8406	21.8613
ENSG00000180228	PRKRA	0.269386	0.995699	1.22246	1.22246	132.002	107.981	0.076214	0.575136	1.65297	1.65297	132.002	79.8577	0.0112989	0.1202	1.6192	1.6192	132.002	81.5234
ENSG00000124659	TBCC	0.269504	0.995699	0.768108	-1.3019	70.078	91.2345	0.767661	0.944052	0.896546	-1.11539	70.078	78.1644	0.685443	0.875355	0.90427	-1.10586	70.078	77.4967
ENSG00000288924	---	0.269579	0.995699	1.22611	1.22611	88.895	72.5014	0.163556	0.697991	0.676709	-1.47774	88.895	131.364	0.507238	0.778976	0.882138	-1.13361	88.895	100.772
ENSG00000239672	NME1	0.269742	0.995699	1.53005	1.53005	29.8464	19.5068	0.658816	0.918049	1.29935	1.29935	29.8464	22.9703	0.0840905	0.347467	2.02334	2.02334	29.8464	14.751
ENSG00000101940	WDR13	0.269766	0.995699	1.38419	1.38419	49.5396	35.7897	0.530521	0.873588	1.33009	1.33009	49.5396	37.2453	0.217639	0.546988	1.45765	1.45765	49.5396	33.986
ENSG00000111843	TMEM14C	0.269872	0.995699	0.684886	-1.4601	40.0254	58.441	0.453311	0.83736	0.672386	-1.48724	40.0254	59.5274	0.521347	0.787786	0.795516	-1.25705	40.0254	50.3138
ENSG00000165476	REEP3	0.27008	0.995699	0.735748	-1.35916	43.9589	59.7473	0.84812	0.963367	0.920774	-1.08604	43.9589	47.7413	0.52392	0.789253	0.831859	-1.20213	43.9589	52.8443
ENSG00000183684	ALYREF	0.270262	0.995699	1.48741	1.48741	24.3973	16.4026	0.914978	0.979245	0.943191	-1.06023	24.3973	25.8668	0.851958	0.952045	1.07106	1.07106	24.3973	22.7787
ENSG00000129675	ARHGEF6	0.270283	0.995699	0.773967	-1.29204	99.9674	129.162	0.183142	0.710097	0.620912	-1.61053	99.9674	161.001	0.191701	0.514898	0.730248	-1.3694	99.9674	136.895
ENSG00000179833	SERTAD2	0.270372	0.995699	0.738577	-1.35395	46.3181	62.7126	0.20517	0.727546	0.585746	-1.70723	46.3181	79.0754	0.551673	0.805949	0.843165	-1.18601	46.3181	54.9336
ENSG00000096746	HNRNPH3	0.270384	0.995699	0.738392	-1.35429	376.914	510.452	0.990653	0.998503	1.00501	1.00501	376.914	375.036	0.46418	0.756102	0.811338	-1.23253	376.914	464.559
ENSG00000118971	CCND2	0.27062	0.995699	0.814142	-1.22829	353.458	434.149	0.264185	0.758779	0.724553	-1.38016	353.458	487.83	0.248644	0.576947	0.799817	-1.25029	353.458	441.924
ENSG00000168394	TAP1	0.271373	0.995699	1.22224	1.22224	68.7591	56.2567	0.0962413	0.61871	1.60794	1.60794	68.7591	42.7623	0.630284	0.847574	0.914228	-1.09382	68.7591	75.21
ENSG00000182774	RPS17	0.271386	0.995699	0.812653	-1.23054	1467.14	1805.37	2.7395e-05	0.0698561	0.294034	-3.40097	1467.14	4989.68	0.00478967	0.0718574	0.575723	-1.73695	1467.14	2548.34
ENSG00000197555	SIPA1L1	0.271415	0.995699	1.26374	1.26374	40.8065	32.2902	0.0135177	0.277516	2.34238	2.34238	40.8065	17.421	1.47592e-05	0.00234553	3.11938	3.11938	40.8065	13.0816
ENSG00000242259	C22orf39	0.271831	0.995699	0.796959	-1.25477	41.0527	51.5117	0.0287042	0.388875	0.504981	-1.98027	41.0527	81.2956	0.00314051	0.0577804	0.537065	-1.86197	41.0527	76.439
ENSG00000120696	KBTBD7	0.271874	0.995699	1.35432	1.35432	48.1144	35.5266	0.0887654	0.603588	2.09331	2.09331	48.1144	22.9849	0.126209	0.423909	1.55025	1.55025	48.1144	31.0366
ENSG00000110315	RNF141	0.27203	0.995699	0.847242	-1.1803	51.9416	61.3067	0.86441	0.965762	1.04085	1.04085	51.9416	49.9029	0.671275	0.867143	1.06983	1.06983	51.9416	48.5512
ENSG00000166164	BRD7	0.272408	0.995699	0.81849	-1.22176	342.079	417.939	0.795826	0.95242	1.07594	1.07594	342.079	317.935	0.602118	0.833223	0.90597	-1.10379	342.079	377.583
ENSG00000036549	ZZZ3	0.272513	0.995699	1.25477	1.25477	204.211	162.747	0.170043	0.703071	1.55327	1.55327	204.211	131.472	0.659902	0.86262	1.09874	1.09874	204.211	185.86
ENSG00000101138	CSTF1	0.272746	0.995699	1.36323	1.36323	46.3924	34.0311	0.788471	0.950029	1.12347	1.12347	46.3924	41.2937	0.888184	0.967842	1.04159	1.04159	46.3924	44.5401
ENSG00000146263	MMS22L	0.273129	0.995699	0.725718	-1.37794	57.8217	79.675	0.411234	0.830537	1.45642	1.45642	57.8217	39.7011	0.2929	0.625077	1.38344	1.38344	57.8217	41.7956
ENSG00000154144	TBRG1	0.273189	0.995699	0.810215	-1.23424	180.414	222.674	0.911149	0.97791	1.03378	1.03378	180.414	174.519	0.450607	0.745618	0.860474	-1.16215	180.414	209.668
ENSG00000149136	SSRP1	0.273311	0.995699	0.828442	-1.20708	161.285	194.685	0.363947	0.808843	0.786146	-1.27203	161.285	205.159	0.00993483	0.111774	0.633135	-1.57944	161.285	254.74
ENSG00000127334	DYRK2	0.273592	0.995699	1.19571	1.19571	375.502	314.04	0.402498	0.827192	1.23558	1.23558	375.502	303.908	0.477286	0.76638	1.12772	1.12772	375.502	332.974
ENSG00000205339	IPO7	0.273631	0.995699	1.18654	1.18654	177.2	149.341	0.1673	0.700865	1.39759	1.39759	177.2	126.789	0.0684434	0.309905	1.34422	1.34422	177.2	131.823
ENSG00000154473	BUB3	0.273748	0.995699	0.810677	-1.23354	308.388	380.408	0.410994	0.830537	0.783623	-1.27612	308.388	393.541	0.937304	0.982158	0.984438	-1.01581	308.388	313.263
ENSG00000228649	SNHG26	0.274079	0.995699	1.44493	1.44493	22.8192	15.7926	0.283783	0.760959	1.75583	1.75583	22.8192	12.9963	0.340248	0.669129	1.39145	1.39145	22.8192	16.3997
ENSG00000164172	MOCS2	0.274364	0.995699	1.31657	1.31657	39.9289	30.3279	0.78494	0.947957	1.11091	1.11091	39.9289	35.9424	0.0483176	0.261281	1.69753	1.69753	39.9289	23.5218
ENSG00000155827	RNF20	0.274399	0.995699	0.793529	-1.26019	131.116	165.231	0.714237	0.934449	1.12783	1.12783	131.116	116.255	0.671326	0.867143	0.911002	-1.09769	131.116	143.925
ENSG00000135778	NTPCR	0.274887	0.995699	1.23366	1.23366	37.7067	30.5648	0.765764	0.944052	0.917243	-1.09022	37.7067	41.1087	0.000361086	0.0174604	3.41611	3.41611	37.7067	11.0379
ENSG00000197818	SLC9A8	0.275127	0.995699	0.762398	-1.31165	22.0817	28.9635	0.954383	0.986938	0.978149	-1.02234	22.0817	22.575	0.00384328	0.0633437	0.481793	-2.07558	22.0817	45.8324
ENSG00000140307	GTF2A2	0.275136	0.995699	1.33484	1.33484	60.178	45.0824	0.547998	0.88183	0.784437	-1.2748	60.178	76.7149	0.575504	0.819289	1.16555	1.16555	60.178	51.6307
ENSG00000118007	STAG1	0.275208	0.995699	1.49557	1.49557	155.602	104.042	0.495883	0.857138	1.47541	1.47541	155.602	105.463	0.766622	0.911708	1.12006	1.12006	155.602	138.922
ENSG00000137714	FDX1	0.275302	0.995699	1.25239	1.25239	74.4429	59.4407	0.593683	0.897879	0.845409	-1.18286	74.4429	88.0555	0.330552	0.659188	1.23167	1.23167	74.4429	60.4405
ENSG00000168397	ATG4B	0.27543	0.995699	0.780897	-1.28058	53.9506	69.0879	0.638046	0.911427	1.18105	1.18105	53.9506	45.68	0.047968	0.261	0.630015	-1.58726	53.9506	85.6338
ENSG00000179295	PTPN11	0.275759	0.995699	1.21312	1.21312	170.499	140.546	0.396443	0.82473	1.26177	1.26177	170.499	135.126	0.832691	0.944603	1.03941	1.03941	170.499	164.035
ENSG00000137575	SDCBP	0.276024	0.995699	0.793308	-1.26054	183.363	231.137	0.429109	0.832061	0.77122	-1.29665	183.363	237.757	0.613282	0.837605	0.894402	-1.11807	183.363	205.012
ENSG00000173011	TADA2B	0.276267	0.995699	0.764965	-1.30725	45.8236	59.9029	0.541739	0.880233	1.26486	1.26486	45.8236	36.2281	0.354578	0.680797	1.27306	1.27306	45.8236	35.995
ENSG00000213261	EEF1B2P6	0.276498	0.995699	0.744776	-1.34269	296.035	397.482	0.00975678	0.241894	0.339115	-2.94885	296.035	872.964	0.0286904	0.199878	0.54099	-1.84846	296.035	547.21
ENSG00000159086	PAXBP1	0.276882	0.995699	1.25717	1.25717	178.083	141.653	0.0238653	0.354182	2.10135	2.10135	178.083	84.7468	5.58932e-06	0.0014865	2.79744	2.79744	178.083	63.6591
ENSG00000023287	RB1CC1	0.277028	0.995699	1.29522	1.29522	265.944	205.327	0.15403	0.689222	1.6927	1.6927	265.944	157.113	0.000133325	0.0102643	2.61429	2.61429	265.944	101.727
ENSG00000167842	MIS12	0.277372	0.995699	1.35395	1.35395	59.9197	44.2556	0.532565	0.8748	1.30848	1.30848	59.9197	45.7934	0.485282	0.768648	1.2225	1.2225	59.9197	49.014
ENSG00000163684	RPP14	0.27764	0.995699	1.34435	1.34435	38.229	28.4368	0.388949	0.823052	1.43851	1.43851	38.229	26.5755	0.000391805	0.017789	3.96904	3.96904	38.229	9.6318
ENSG00000100612	DHRS7	0.277725	0.995699	0.77697	-1.28705	46.0075	59.214	0.50863	0.86233	0.789295	-1.26695	46.0075	58.2894	0.555683	0.809382	0.867269	-1.15304	46.0075	53.0487
ENSG00000167325	RRM1	0.278036	0.995699	0.82773	-1.20812	104.607	126.378	0.0472168	0.483738	0.5889	-1.69808	104.607	177.631	0.0144689	0.136105	0.644775	-1.55093	104.607	162.238
ENSG00000254772	EEF1G	0.278148	0.995699	0.84453	-1.18409	814.989	965.021	0.00728298	0.223162	0.523988	-1.90844	814.989	1555.36	0.0176077	0.15308	0.681446	-1.46747	814.989	1195.97
ENSG00000169100	SLC25A6	0.278176	0.995699	0.783488	-1.27634	300.418	383.437	0.0105662	0.249165	0.411381	-2.43084	300.418	730.267	0.0101811	0.113035	0.549304	-1.82049	300.418	546.906
ENSG00000170242	USP47	0.278613	0.995699	1.23499	1.23499	246.874	199.899	0.587045	0.895645	1.17775	1.17775	246.874	209.616	0.451503	0.746044	1.16409	1.16409	246.874	212.075
ENSG00000128272	ATF4	0.278786	0.995699	0.779112	-1.28351	204.182	262.07	0.855287	0.963367	0.93698	-1.06726	204.182	217.915	0.104609	0.386406	0.678711	-1.47338	204.182	300.838
ENSG00000289138	---	0.27909	0.995699	0.785956	-1.27234	17.3563	22.083	0.424122	0.831134	0.762949	-1.3107	17.3563	22.749	0.245263	0.574242	0.766823	-1.30408	17.3563	22.634
ENSG00000137200	CMTR1	0.279194	0.995699	0.759878	-1.316	33.4897	44.0724	0.581083	0.892347	1.24561	1.24561	33.4897	26.8862	0.060778	0.292669	1.70749	1.70749	33.4897	19.6134
ENSG00000006451	RALA	0.279207	0.995699	1.2019	1.2019	152.576	126.945	0.843311	0.963204	0.949681	-1.05299	152.576	160.66	0.653073	0.859757	0.924403	-1.08178	152.576	165.053
ENSG00000151893	CACUL1	0.279462	0.995699	1.233	1.233	110.514	89.6298	0.985195	0.995918	1.00554	1.00554	110.514	109.905	0.563454	0.812907	0.89146	-1.12176	110.514	123.969
ENSG00000107796	ACTA2	0.279745	0.995699	1.4304	1.4304	31.418	21.9645	0.0918067	0.608336	2.42178	2.42178	31.418	12.9731	0.00285296	0.0545513	3.01764	3.01764	31.418	10.4114
ENSG00000165997	ARL5B	0.279758	0.995699	1.35643	1.35643	41.3231	30.4646	0.5796	0.892236	1.27222	1.27222	41.3231	32.481	0.685148	0.875355	1.12456	1.12456	41.3231	36.7461
ENSG00000107897	ACBD5	0.280081	0.995699	0.858764	-1.16446	100.234	116.719	0.262521	0.757402	1.28076	1.28076	100.234	78.2617	0.151722	0.463566	1.238	1.238	100.234	80.9644
ENSG00000144559	TAMM41	0.280366	0.995699	1.3067	1.3067	22.9693	17.5781	0.524198	0.868862	0.790545	-1.26495	22.9693	29.055	0.645623	0.858252	0.892026	-1.12104	22.9693	25.7496
ENSG00000167323	STIM1	0.280371	0.995699	0.770725	-1.29748	102.524	133.023	0.195788	0.721362	0.618177	-1.61766	102.524	165.85	0.184484	0.504635	0.717719	-1.3933	102.524	142.847
ENSG00000166801	FAM111A	0.280994	0.995699	1.18881	1.18881	259.5	218.285	0.121878	0.647563	1.46987	1.46987	259.5	176.546	0.00365369	0.0616072	1.62816	1.62816	259.5	159.383
ENSG00000139193	CD27	0.281644	0.995699	0.731387	-1.36727	108.212	147.955	0.0603995	0.531184	0.431231	-2.31894	108.212	250.938	0.0148235	0.137478	0.480721	-2.08021	108.212	225.105
ENSG00000130255	RPL36	0.281707	0.995699	0.802486	-1.24613	1974.41	2460.37	0.000945179	0.0993677	0.351238	-2.84707	1974.41	5621.29	0.0281072	0.197425	0.627591	-1.5934	1974.41	3146.02
ENSG00000165458	INPPL1	0.281784	0.995699	0.728863	-1.372	76.8191	105.396	0.73989	0.936216	0.85985	-1.16299	76.8191	89.3401	0.0797515	0.335702	0.587038	-1.70347	76.8191	130.859
ENSG00000013374	NUB1	0.281816	0.995699	1.23	1.23	165.465	134.525	0.390679	0.823695	1.2911	1.2911	165.465	128.158	0.434282	0.736328	1.16836	1.16836	165.465	141.621
ENSG00000166135	HIF1AN	0.281881	0.995699	1.27602	1.27602	88.0902	69.0353	0.391856	0.823825	1.35005	1.35005	88.0902	65.2498	0.977871	0.994528	1.00649	1.00649	88.0902	87.5225
ENSG00000224631	RPS27AP16	0.282052	0.995699	0.731903	-1.3663	3446.44	4708.87	0.0178298	0.320991	0.344832	-2.89996	3446.44	9994.53	0.0149672	0.137478	0.480548	-2.08096	3446.44	7171.9
ENSG00000168395	ING5	0.282087	0.995699	0.775301	-1.28982	98.837	127.482	0.455195	0.838784	1.3169	1.3169	98.837	75.053	0.485012	0.768603	0.842518	-1.18692	98.837	117.311
ENSG00000163492	CCDC141	0.282095	0.995699	1.4094	1.4094	65.5841	46.5333	0.0687997	0.552101	2.48647	2.48647	65.5841	26.3764	0.00086547	0.0266519	3.17761	3.17761	65.5841	20.6394
ENSG00000104765	BNIP3L	0.282158	0.995699	0.850655	-1.17556	144.742	170.154	0.240305	0.745985	0.762156	-1.31207	144.742	189.912	0.695645	0.879459	1.06357	1.06357	144.742	136.091
ENSG00000178449	COX14	0.28216	0.995699	0.802726	-1.24576	70.1705	87.4153	0.0855754	0.597362	0.58419	-1.71177	70.1705	120.116	0.248949	0.576947	0.783375	-1.27653	70.1705	89.5746
ENSG00000234166	ARHGEF19-AS1	0.282233	0.995699	0.625092	-1.59976	7.41073	11.8554	0.751218	0.940071	0.806954	-1.23923	7.41073	9.18359	0.214676	0.545309	0.572729	-1.74603	7.41073	12.9393
ENSG00000204435	CSNK2B	0.282284	0.995699	0.757053	-1.32091	39.2913	51.9003	0.133162	0.659276	0.551994	-1.81162	39.2913	71.1807	0.170361	0.486709	0.692946	-1.44311	39.2913	56.7018
ENSG00000286330	---	0.282365	0.995699	0.748135	-1.33666	42.1431	56.3309	0.308514	0.779797	1.54225	1.54225	42.1431	27.3257	0.0927241	0.364166	1.63414	1.63414	42.1431	25.7892
ENSG00000096996	IL12RB1	0.282467	0.995699	0.701183	-1.42616	18.9593	27.039	0.682332	0.927369	0.811624	-1.2321	18.9593	23.3597	0.113364	0.402238	0.584177	-1.71181	18.9593	32.4547
ENSG00000137752	CASP1	0.28267	0.995699	0.754388	-1.32558	66.3714	87.9804	0.758816	0.942084	1.13342	1.13342	66.3714	58.5584	0.342808	0.671276	1.30019	1.30019	66.3714	51.0476
ENSG00000138698	RAP1GDS1	0.282682	0.995699	1.19917	1.19917	55.4247	46.2191	0.87985	0.96808	0.961932	-1.03957	55.4247	57.6181	0.385585	0.704139	1.16349	1.16349	55.4247	47.6364
ENSG00000278311	GGNBP2	0.282994	0.995699	0.868228	-1.15177	396.451	456.62	0.796099	0.952438	1.0541	1.0541	396.451	376.103	0.0365606	0.228543	0.752228	-1.32938	396.451	527.036
ENSG00000141580	WDR45B	0.28314	0.995699	0.741928	-1.34784	121.972	164.398	0.833635	0.960503	0.913496	-1.0947	121.972	133.522	0.232022	0.560512	0.708531	-1.41137	121.972	172.147
ENSG00000100345	MYH9	0.283153	0.995699	0.84912	-1.17769	740.402	871.964	0.375416	0.817173	0.811387	-1.23246	740.402	912.514	0.540394	0.797969	0.907693	-1.10169	740.402	815.696
ENSG00000144043	TEX261	0.283695	0.995699	1.30308	1.30308	27.0933	20.7918	0.16384	0.697991	0.600945	-1.66405	27.0933	45.0844	0.564563	0.81336	0.866307	-1.15433	27.0933	31.2745
ENSG00000158985	CDC42SE2	0.283702	0.995699	1.23747	1.23747	579.665	468.428	0.409228	0.830135	1.28918	1.28918	579.665	449.64	0.0800915	0.336407	1.43523	1.43523	579.665	403.884
ENSG00000011143	MKS1	0.284003	0.995699	0.738206	-1.35464	20.5591	27.8501	0.711105	0.934449	1.17919	1.17919	20.5591	17.4349	0.980501	0.995991	1.0073	1.0073	20.5591	20.4101
ENSG00000134852	CLOCK	0.284359	0.995699	1.36274	1.36274	94.3944	69.268	0.594487	0.898219	1.26849	1.26849	94.3944	74.4149	0.00395263	0.0640632	2.44652	2.44652	94.3944	38.5831
ENSG00000185477	GPRIN3	0.284381	0.995699	1.28018	1.28018	182.606	142.641	0.155686	0.690849	1.66301	1.66301	182.606	109.805	0.00245891	0.0499551	2.08356	2.08356	182.606	87.6413
ENSG00000180817	PPA1	0.28447	0.995699	1.27005	1.27005	90.9486	71.6103	0.501074	0.859163	0.794527	-1.25861	90.9486	114.469	0.051462	0.269747	1.58424	1.58424	90.9486	57.4085
ENSG00000172005	MAL	0.284503	0.995699	0.717866	-1.39302	60.415	84.1591	0.00315064	0.160759	0.246108	-4.06325	60.415	245.481	0.00254636	0.0511984	0.381251	-2.62294	60.415	158.465
ENSG00000162783	IER5	0.284552	0.995699	0.792571	-1.26172	176.663	222.899	0.0687508	0.552101	0.54356	-1.83972	176.663	325.011	0.0194951	0.161662	0.591526	-1.69054	176.663	298.656
ENSG00000070831	CDC42	0.284883	0.995699	0.813061	-1.22992	327.479	402.772	0.0175385	0.317702	0.491932	-2.0328	327.479	665.699	0.148409	0.457519	0.748141	-1.33665	327.479	437.723
ENSG00000134851	TMEM165	0.285106	0.995699	1.23203	1.23203	138.766	112.632	0.844815	0.963204	0.942926	-1.06053	138.766	147.166	0.658499	0.861556	1.09327	1.09327	138.766	126.928
ENSG00000164609	SLU7	0.285348	0.995699	0.812223	-1.23119	263.067	323.885	0.765232	0.944004	0.913945	-1.09416	263.067	287.837	0.533046	0.795347	0.881666	-1.13422	263.067	298.375
ENSG00000183530	PRR14L	0.285558	0.995699	1.30959	1.30959	119.32	91.1121	0.209339	0.729879	1.63612	1.63612	119.32	72.9288	0.0322058	0.213163	1.7592	1.7592	119.32	67.8263
ENSG00000198791	CNOT7	0.285579	0.995699	1.16558	1.16558	247.262	212.136	0.228885	0.742415	0.767281	-1.3033	247.262	322.257	0.365623	0.688958	0.874808	-1.14311	247.262	282.647
ENSG00000168303	MPLKIP	0.28559	0.995699	1.21894	1.21894	109.091	89.4965	0.582918	0.892702	0.855686	-1.16865	109.091	127.489	0.980763	0.996085	1.00461	1.00461	109.091	108.59
ENSG00000163904	SENP2	0.285616	0.995699	0.841404	-1.18849	55.7748	66.2878	0.778432	0.945465	1.07336	1.07336	55.7748	51.9629	0.0481312	0.261	1.42222	1.42222	55.7748	39.2168
ENSG00000175931	UBE2O	0.285714	0.995699	1.23694	1.23694	37.6665	30.4514	0.134377	0.661054	1.59822	1.59822	37.6665	23.5677	0.843831	0.948158	1.04071	1.04071	37.6665	36.1929
ENSG00000170860	LSM3	0.285853	0.995699	0.762281	-1.31185	45.3491	59.4913	0.00960003	0.241243	0.367051	-2.72442	45.3491	123.55	0.156152	0.4695	0.687779	-1.45396	45.3491	65.9356
ENSG00000104447	TRPS1	0.285911	0.995699	1.30581	1.30581	131.877	100.992	0.462973	0.844733	1.32839	1.32839	131.877	99.2758	0.756507	0.907089	1.08343	1.08343	131.877	121.722
ENSG00000170471	RALGAPB	0.286431	0.995699	1.19651	1.19651	91.039	76.0871	0.156931	0.693828	1.44866	1.44866	91.039	62.8435	0.926396	0.979577	1.01608	1.01608	91.039	89.5984
ENSG00000105705	SUGP1	0.286449	0.995699	0.757321	-1.32044	24.1234	31.8536	0.393497	0.823917	1.42436	1.42436	24.1234	16.9363	0.0590127	0.28854	1.7597	1.7597	24.1234	13.7088
ENSG00000165813	CCDC186	0.2867	0.995699	1.22868	1.22868	298.233	242.727	0.186061	0.710292	1.48638	1.48638	298.233	200.644	0.00931242	0.108756	1.6891	1.6891	298.233	176.563
ENSG00000276234	TADA2A	0.286731	0.995699	1.26025	1.26025	42.195	33.4815	0.187285	0.711561	1.56414	1.56414	42.195	26.9766	0.590736	0.827031	1.12703	1.12703	42.195	37.4392
ENSG00000174695	TMEM167A	0.286818	0.995699	1.29724	1.29724	93.4965	72.0735	0.453824	0.837906	0.755434	-1.32374	93.4965	123.765	0.888327	0.967842	0.965261	-1.03599	93.4965	96.8614
ENSG00000034510	TMSB10	0.28683	0.995699	0.794113	-1.25927	459.841	579.062	0.000130476	0.0698561	0.278323	-3.59295	459.841	1652.18	0.0102204	0.113128	0.56184	-1.77986	459.841	818.454
ENSG00000138496	PARP9	0.286991	0.995699	1.26333	1.26333	260.272	206.021	0.015028	0.290205	2.2986	2.2986	260.272	113.231	0.180167	0.497712	1.35701	1.35701	260.272	191.797
ENSG00000177485	ZBTB33	0.287048	0.995699	1.37052	1.37052	44.1092	32.1842	0.958552	0.988188	0.976719	-1.02384	44.1092	45.1606	0.585017	0.822917	1.18132	1.18132	44.1092	37.3388
ENSG00000175354	PTPN2	0.287239	0.995699	1.18243	1.18243	172.343	145.754	0.536698	0.876751	1.16207	1.16207	172.343	148.307	0.727168	0.895341	1.05833	1.05833	172.343	162.845
ENSG00000066455	GOLGA5	0.287572	0.995699	1.39067	1.39067	25.5258	18.3551	0.838554	0.962757	0.908647	-1.10054	25.5258	28.0921	0.0608696	0.292669	1.89028	1.89028	25.5258	13.5037
ENSG00000172493	AFF1	0.28768	0.995699	1.29042	1.29042	97.4143	75.4906	0.482197	0.853938	1.29767	1.29767	97.4143	75.0685	0.409863	0.725113	1.2268	1.2268	97.4143	79.4049
ENSG00000109534	GAR1	0.287706	0.995699	1.32594	1.32594	46.6429	35.1773	0.673323	0.922652	0.843265	-1.18587	46.6429	55.3122	0.818378	0.937601	0.939563	-1.06432	46.6429	49.6432
ENSG00000197956	S100A6	0.288084	0.995699	0.807524	-1.23835	290.477	359.714	0.0028809	0.154644	0.396597	-2.52145	290.477	732.425	0.0791149	0.335311	0.693129	-1.44273	290.477	419.081
ENSG00000101882	NKAP	0.288132	0.995699	0.777695	-1.28585	86.3229	110.998	0.871931	0.966887	0.942627	-1.06086	86.3229	91.5769	0.65986	0.86262	0.897439	-1.11428	86.3229	96.188
ENSG00000047410	TPR	0.288388	0.995699	1.24424	1.24424	798.218	641.531	0.325064	0.79156	1.3686	1.3686	798.218	583.237	0.0382712	0.234231	1.55758	1.55758	798.218	512.473
ENSG00000121104	FAM117A	0.288474	0.995699	0.725546	-1.37827	128.705	177.391	0.334947	0.795744	0.63732	-1.56907	128.705	201.947	0.157887	0.472576	0.642442	-1.55656	128.705	200.337
ENSG00000271533	---	0.288675	0.995699	1.40086	1.40086	91.9315	65.6251	0.104783	0.630153	2.23402	2.23402	91.9315	41.1507	0.0487428	0.262127	1.92089	1.92089	91.9315	47.8588
ENSG00000168159	RNF187	0.288931	0.995699	0.804531	-1.24296	143.894	178.854	0.422054	0.831134	0.77548	-1.28952	143.894	185.555	0.322554	0.652017	0.810309	-1.2341	143.894	177.579
ENSG00000143198	MGST3	0.289056	0.995699	1.3515	1.3515	95.4793	70.6469	0.412764	0.830537	0.699613	-1.42936	95.4793	136.474	0.859066	0.955141	1.05353	1.05353	95.4793	90.6278
ENSG00000147419	CCDC25	0.289614	0.995699	0.851757	-1.17404	128.894	151.327	0.420329	0.831134	0.828592	-1.20687	128.894	155.557	0.13622	0.436247	0.792071	-1.26251	128.894	162.73
ENSG00000267121	FMNL1-DT	0.289626	0.995699	0.719774	-1.38933	148.332	206.081	0.176978	0.705032	1.92231	1.92231	148.332	77.1631	0.562814	0.812491	1.2057	1.2057	148.332	123.025
ENSG00000165782	PIP4P1	0.289724	0.995699	0.787251	-1.27024	55.1307	70.0294	0.423865	0.831134	0.757268	-1.32054	55.1307	72.8021	0.075206	0.324267	0.660974	-1.51292	55.1307	83.4083
ENSG00000139842	CUL4A	0.289957	0.995699	0.826131	-1.21046	122.309	148.051	0.61074	0.903069	0.867723	-1.15244	122.309	140.955	0.291488	0.623583	0.821088	-1.2179	122.309	148.96
ENSG00000133657	ATP13A3	0.289963	0.995699	1.20584	1.20584	190.46	157.948	0.126736	0.652759	1.52129	1.52129	190.46	125.196	0.00808648	0.0991907	1.63195	1.63195	190.46	116.707
ENSG00000170160	CCDC144A	0.289994	0.995699	1.53393	1.53393	62.5019	40.7462	0.550826	0.88237	1.45214	1.45214	62.5019	43.0414	0.468585	0.759835	1.3542	1.3542	62.5019	46.1542
ENSG00000157954	WIPI2	0.290205	0.995699	0.856168	-1.16799	109.242	127.594	0.590131	0.897036	0.885272	-1.1296	109.242	123.399	0.0177534	0.154058	0.699456	-1.42968	109.242	156.181
ENSG00000230124	ACBD6	0.290283	0.995699	1.44858	1.44858	32.1515	22.1951	0.515532	0.865531	1.42187	1.42187	32.1515	22.6121	0.0808185	0.338489	1.90686	1.90686	32.1515	16.861
ENSG00000130402	ACTN4	0.290336	0.995699	1.28111	1.28111	40.9323	31.9505	0.382792	0.818909	0.734613	-1.36126	40.9323	55.7195	0.98611	0.996983	0.995838	-1.00418	40.9323	41.1034
ENSG00000186017	ZNF566	0.290371	0.995699	0.731537	-1.36699	38.023	51.9768	0.27777	0.760636	1.66005	1.66005	38.023	22.9047	0.838858	0.946425	0.939319	-1.0646	38.023	40.4793
ENSG00000155463	OXA1L	0.290425	0.995699	1.24152	1.24152	79.6086	64.1217	0.242686	0.746358	0.69514	-1.43856	79.6086	114.522	0.515026	0.7823	0.87242	-1.14624	79.6086	91.2503
ENSG00000116273	PHF13	0.2906	0.995699	1.3688	1.3688	33.0238	24.1261	0.0945781	0.616855	2.1945	2.1945	33.0238	15.0485	0.178972	0.495816	1.51279	1.51279	33.0238	21.8298
ENSG00000107929	LARP4B	0.290603	0.995699	1.13916	1.13916	118.498	104.023	0.301082	0.774069	1.21781	1.21781	118.498	97.3045	0.91547	0.976701	0.986711	-1.01347	118.498	120.094
ENSG00000140829	DHX38	0.290669	0.995699	1.42187	1.42187	183.752	129.232	0.0934449	0.611694	2.38416	2.38416	183.752	77.0721	0.0973656	0.37381	1.77487	1.77487	183.752	103.53
ENSG00000189067	LITAF	0.29068	0.995699	0.838273	-1.19293	369.824	441.173	0.0454752	0.472656	0.597243	-1.67436	369.824	619.218	0.524402	0.789572	0.895446	-1.11676	369.824	413.005
ENSG00000166908	PIP4K2C	0.290826	0.995699	1.4022	1.4022	24.5771	17.5276	0.991638	0.998867	1.00512	1.00512	24.5771	24.452	0.257322	0.585834	1.45944	1.45944	24.5771	16.8401
ENSG00000164163	ABCE1	0.291314	0.995699	1.17976	1.17976	136.036	115.308	0.552737	0.88237	1.15426	1.15426	136.036	117.856	0.213635	0.544231	1.22375	1.22375	136.036	111.163
ENSG00000099992	TBC1D10A	0.291371	0.995699	0.710649	-1.40717	26.8344	37.7604	0.281303	0.760636	0.585734	-1.70726	26.8344	45.8132	0.879731	0.96451	1.05357	1.05357	26.8344	25.4698
ENSG00000113583	C5orf15	0.291583	0.995699	1.43635	1.43635	49.0794	34.1694	0.891175	0.970095	1.07491	1.07491	49.0794	45.659	0.1994	0.525772	1.58301	1.58301	49.0794	31.0038
ENSG00000213079	SCAF8	0.291586	0.995699	1.15639	1.15639	148.779	128.658	0.0777498	0.575366	1.46006	1.46006	148.779	101.899	0.0146353	0.13701	1.42097	1.42097	148.779	104.702
ENSG00000053254	FOXN3	0.291641	0.995699	0.830503	-1.20409	290.568	349.87	0.155264	0.690063	0.679461	-1.47175	290.568	427.645	0.118752	0.411685	0.752223	-1.32939	290.568	386.279
ENSG00000109685	NSD2	0.291771	0.995699	0.83939	-1.19134	137.09	163.321	0.0767275	0.575136	1.58634	1.58634	137.09	86.4193	0.266774	0.596228	1.2127	1.2127	137.09	113.046
ENSG00000104823	ECH1	0.291955	0.995699	1.32876	1.32876	47.9129	36.0585	0.891381	0.970139	0.945231	-1.05794	47.9129	50.6891	0.854639	0.952838	0.950667	-1.05189	47.9129	50.3992
ENSG00000114942	EEF1B2	0.291974	0.995699	0.833781	-1.19936	989.15	1186.34	0.00225068	0.129503	0.442644	-2.25915	989.15	2234.64	0.0101411	0.112911	0.631256	-1.58414	989.15	1566.95
ENSG00000089159	PXN	0.292062	0.995699	0.709793	-1.40886	131.209	184.855	0.456726	0.839555	0.687587	-1.45436	131.209	190.825	0.104491	0.386406	0.578421	-1.72885	131.209	226.839
ENSG00000153827	TRIP12	0.292106	0.995699	1.12798	1.12798	293.833	260.495	0.0737867	0.569902	1.37351	1.37351	293.833	213.929	0.0136151	0.13277	1.34134	1.34134	293.833	219.059
ENSG00000170889	RPS9	0.29219	0.995699	0.771379	-1.29638	971.739	1259.74	0.016003	0.302044	0.398981	-2.50639	971.739	2435.55	0.0149524	0.137478	0.536715	-1.86319	971.739	1810.53
ENSG00000175309	PHYKPL	0.292258	0.995699	1.28084	1.28084	80.7503	63.045	0.36969	0.81294	1.38605	1.38605	80.7503	58.2594	0.00192993	0.0425671	2.19634	2.19634	80.7503	36.7659
ENSG00000105856	HBP1	0.292718	0.995699	1.2088	1.2088	134.085	110.924	0.179112	0.705714	1.45639	1.45639	134.085	92.0671	0.952994	0.986199	1.01101	1.01101	134.085	132.625
ENSG00000137501	SYTL2	0.292974	0.995699	1.34492	1.34492	25.1154	18.6743	0.916269	0.979731	1.04611	1.04611	25.1154	24.0084	0.274663	0.605285	1.3771	1.3771	25.1154	18.2379
ENSG00000109133	TMEM33	0.29302	0.995699	1.22525	1.22525	99.0173	80.8136	0.802022	0.953302	1.07738	1.07738	99.0173	91.9053	0.208159	0.537999	1.28721	1.28721	99.0173	76.9239
ENSG00000060237	WNK1	0.293164	0.995699	1.15183	1.15183	552.362	479.55	0.236314	0.745985	1.27973	1.27973	552.362	431.623	0.10122	0.380873	1.25705	1.25705	552.362	439.411
ENSG00000174238	PITPNA	0.293195	0.995699	1.35577	1.35577	56.2103	41.4601	0.470308	0.847468	1.38168	1.38168	56.2103	40.6827	0.116746	0.40854	1.60602	1.60602	56.2103	34.9998
ENSG00000146842	TMEM209	0.293196	0.995699	1.29246	1.29246	25.567	19.7816	0.513593	0.865113	0.788019	-1.269	25.567	32.4446	0.16349	0.479753	1.4381	1.4381	25.567	17.7782
ENSG00000113263	ITK	0.29342	0.995699	0.771842	-1.2956	336.204	435.587	0.529841	0.873161	1.27153	1.27153	336.204	264.409	0.605917	0.833561	0.876335	-1.14112	336.204	383.648
ENSG00000086758	HUWE1	0.29354	0.995699	1.29592	1.29592	179.38	138.419	0.259611	0.753835	1.53937	1.53937	179.38	116.528	0.00214147	0.0453977	2.22168	2.22168	179.38	80.7407
ENSG00000196455	PIK3R4	0.293882	0.995699	0.700219	-1.42813	54.2289	77.4457	0.151113	0.684336	2.15654	2.15654	54.2289	25.1463	0.545071	0.801414	1.23971	1.23971	54.2289	43.7432
ENSG00000110422	HIPK3	0.294408	0.995699	0.830141	-1.20461	131.634	158.568	0.671855	0.922494	0.890289	-1.12323	131.634	147.855	0.458905	0.751694	0.872546	-1.14607	131.634	150.862
ENSG00000162739	SLAMF6	0.294488	0.995699	1.40426	1.40426	19.5152	13.8971	0.645805	0.914046	0.799692	-1.25048	19.5152	24.4034	0.187083	0.507748	1.57855	1.57855	19.5152	12.3627
ENSG00000172062	SMN1	0.294931	0.995699	1.33012	1.33012	47.3673	35.6112	0.325814	0.79156	1.51485	1.51485	47.3673	31.2687	0.00982027	0.111138	2.13295	2.13295	47.3673	22.2074
ENSG00000179583	CIITA	0.295023	0.995699	1.47343	1.47343	29.2574	19.8567	0.484341	0.854501	0.675099	-1.48126	29.2574	43.338	0.431551	0.734919	0.743404	-1.34516	29.2574	39.356
ENSG00000213658	LAT	0.29519	0.995699	0.836116	-1.19601	120.273	143.848	0.839331	0.963204	0.947798	-1.05508	120.273	126.898	0.0885314	0.3569	0.740389	-1.35064	120.273	162.446
ENSG00000177125	ZBTB34	0.295666	0.995699	1.34748	1.34748	24.8435	18.4371	0.397674	0.824971	1.4532	1.4532	24.8435	17.0957	0.20829	0.538031	1.45118	1.45118	24.8435	17.1195
ENSG00000117602	RCAN3	0.295693	0.995699	0.827082	-1.20907	417.698	505.026	0.626829	0.909656	0.872304	-1.14639	417.698	478.845	0.757299	0.907347	0.943399	-1.06	417.698	442.759
ENSG00000228665	---	0.295741	0.995699	0.669453	-1.49376	41.3188	61.7202	0.248719	0.749787	0.505558	-1.97801	41.3188	81.729	0.573665	0.817742	0.798518	-1.25232	41.3188	51.7443
ENSG00000154229	PRKCA	0.295851	0.995699	1.24345	1.24345	109.122	87.7572	0.470746	0.847468	1.26162	1.26162	109.122	86.4935	0.694902	0.879105	1.088	1.088	109.122	100.296
ENSG00000187257	RSBN1L	0.296201	0.995699	0.745272	-1.34179	257.988	346.166	0.426496	0.831134	1.41543	1.41543	257.988	182.268	0.899306	0.972284	1.0377	1.0377	257.988	248.615
ENSG00000112118	MCM3	0.296333	0.995699	1.23209	1.23209	77.8152	63.157	0.286082	0.762233	0.723105	-1.38293	77.8152	107.613	0.0572823	0.283772	0.679202	-1.47232	77.8152	114.569
ENSG00000274602	PI4KAP1	0.296809	0.995699	0.74936	-1.33447	51.5802	68.8323	0.160359	0.696725	1.8472	1.8472	51.5802	27.9234	0.573241	0.817742	1.17712	1.17712	51.5802	43.8191
ENSG00000133704	IPO8	0.296994	0.995699	1.17659	1.17659	98.0771	83.3571	0.618426	0.904828	1.12696	1.12696	98.0771	87.0284	0.912506	0.97553	1.01773	1.01773	98.0771	96.3683
ENSG00000138363	ATIC	0.297474	0.995699	1.28164	1.28164	46.2712	36.1031	0.272425	0.760636	0.673766	-1.48419	46.2712	68.6754	0.522122	0.788167	0.856136	-1.16804	46.2712	54.0465
ENSG00000275052	PPP4R3B	0.297515	0.995699	0.831062	-1.20328	178.167	214.385	0.926833	0.982489	1.0256	1.0256	178.167	173.721	0.990942	0.997469	0.997906	-1.0021	178.167	178.541
ENSG00000279168	---	0.297643	0.995699	1.29293	1.29293	52.0005	40.2192	0.874785	0.966887	1.06143	1.06143	52.0005	48.9907	0.739335	0.899532	1.088	1.088	52.0005	47.7947
ENSG00000165312	OTUD1	0.297698	0.995699	0.656044	-1.52429	45.0728	68.7039	0.5618	0.886008	0.695535	-1.43774	45.0728	64.803	0.996128	0.998346	0.997948	-1.00206	45.0728	45.1655
ENSG00000164109	MAD2L1	0.297742	0.995699	0.696431	-1.43589	18.3613	26.3648	0.40011	0.827139	0.638667	-1.56576	18.3613	28.7494	0.481887	0.768189	0.775512	-1.28947	18.3613	23.6764
ENSG00000215305	VPS16	0.297928	0.995699	0.743133	-1.34565	15.6955	21.1207	0.775926	0.945308	0.882073	-1.13369	15.6955	17.7939	0.231449	0.560397	0.704302	-1.41985	15.6955	22.2852
ENSG00000049656	CLPTM1L	0.298121	0.995699	0.727727	-1.37414	91.5246	125.768	0.86894	0.966887	1.08135	1.08135	91.5246	84.6392	0.335438	0.664854	0.737054	-1.35675	91.5246	124.176
ENSG00000114391	RPL24	0.298236	0.995699	0.849383	-1.17733	424.31	499.551	0.00177229	0.12035	0.4694	-2.13038	424.31	903.94	0.547752	0.802629	0.906508	-1.10313	424.31	468.071
ENSG00000033178	UBA6	0.298769	0.995699	1.21725	1.21725	143.786	118.123	0.338734	0.798521	1.32347	1.32347	143.786	108.643	0.790016	0.922447	1.05337	1.05337	143.786	136.501
ENSG00000047315	POLR2B	0.298825	0.995699	1.27018	1.27018	134.466	105.863	0.232781	0.743971	1.53142	1.53142	134.466	87.8045	0.0537326	0.27578	1.58821	1.58821	134.466	84.6653
ENSG00000121210	TMEM131L	0.299091	0.995699	0.783541	-1.27626	122.965	156.935	0.835505	0.960503	1.07861	1.07861	122.965	114.004	0.591697	0.82728	1.14056	1.14056	122.965	107.811
ENSG00000269973	---	0.299113	0.995699	1.38837	1.38837	22.3461	16.0952	0.935238	0.982844	1.03984	1.03984	22.3461	21.4899	0.621931	0.842204	0.854341	-1.17049	22.3461	26.1559
ENSG00000162441	LZIC	0.299853	0.995699	1.42675	1.42675	140.698	98.6145	0.319636	0.789109	1.69714	1.69714	140.698	82.9032	0.0453131	0.253225	2.04569	2.04569	140.698	68.7781
ENSG00000131116	ZNF428	0.300075	0.995699	0.792995	-1.26104	46.534	58.6814	0.0136309	0.278862	0.432764	-2.31073	46.534	107.527	0.00320187	0.0578214	0.509168	-1.96399	46.534	91.3924
ENSG00000102309	PIN4	0.300454	0.995699	0.755656	-1.32335	46.3334	61.3155	0.028712	0.388875	0.405028	-2.46896	46.3334	114.396	0.118942	0.411685	0.646295	-1.54728	46.3334	71.6909
ENSG00000179933	C14orf119	0.300571	0.995699	1.25191	1.25191	49.6123	39.6292	0.424937	0.831134	1.30686	1.30686	49.6123	37.9629	0.115339	0.406787	1.4283	1.4283	49.6123	34.7352
ENSG00000164941	INTS8	0.300596	0.995699	1.24112	1.24112	60.6315	48.8523	0.0995238	0.624183	1.71383	1.71383	60.6315	35.3778	0.000392203	0.017789	2.26201	2.26201	60.6315	26.8043
ENSG00000027847	B4GALT7	0.300824	0.995699	1.38415	1.38415	18.9613	13.6988	0.554111	0.88237	0.757291	-1.3205	18.9613	25.0383	0.966286	0.989344	0.986637	-1.01354	18.9613	19.2181
ENSG00000125755	SYMPK	0.301181	0.995699	0.761342	-1.31347	61.2162	80.4056	0.977702	0.994876	0.988637	-1.01149	61.2162	61.9198	0.0426677	0.245717	0.575959	-1.73624	61.2162	106.286
ENSG00000083099	LYRM2	0.301182	0.995699	0.752903	-1.32819	163.984	217.803	0.831669	0.960503	1.09471	1.09471	163.984	149.797	0.508006	0.778976	0.828135	-1.20753	163.984	198.016
ENSG00000047849	MAP4	0.301581	0.995699	1.2712	1.2712	96.0276	75.541	0.526817	0.870736	1.25503	1.25503	96.0276	76.514	0.636871	0.852076	0.893329	-1.11941	96.0276	107.494
ENSG00000258427	RBM8B	0.30201	0.995699	1.54107	1.54107	33.9355	22.0208	0.467704	0.847346	1.60181	1.60181	33.9355	21.1857	0.484749	0.768603	1.3527	1.3527	33.9355	25.0873
ENSG00000205323	SARNP	0.302219	0.995699	0.807661	-1.23814	82.5561	102.216	0.311174	0.783763	0.724213	-1.38081	82.5561	113.994	0.021523	0.172078	0.612526	-1.63258	82.5561	134.78
ENSG00000154767	XPC	0.302449	0.995699	0.807926	-1.23774	202.033	250.064	0.703823	0.932744	1.12973	1.12973	202.033	178.833	0.414497	0.726797	1.19248	1.19248	202.033	169.422
ENSG00000153113	CAST	0.302557	0.995699	1.22331	1.22331	498.057	407.14	0.238808	0.745985	1.42886	1.42886	498.057	348.57	0.022086	0.172474	1.59272	1.59272	498.057	312.708
ENSG00000147138	GPR174	0.302567	0.995699	0.754798	-1.32486	55.8759	74.0276	0.681146	0.927046	1.19078	1.19078	55.8759	46.9239	0.118891	0.411685	1.57991	1.57991	55.8759	35.3665
ENSG00000162642	C1orf52	0.30279	0.995699	0.825354	-1.2116	45.7423	55.4215	0.709084	0.934449	1.11449	1.11449	45.7423	41.0433	0.326873	0.654835	0.828377	-1.20718	45.7423	55.2192
ENSG00000111716	LDHB	0.303265	0.995699	0.851808	-1.17397	711.984	835.851	0.0360627	0.422875	0.60361	-1.6567	711.984	1179.54	0.153483	0.465541	0.793954	-1.25952	711.984	896.758
ENSG00000136518	ACTL6A	0.304	0.995699	1.26559	1.26559	52.9538	41.8413	0.0801119	0.583729	1.87939	1.87939	52.9538	28.176	0.000327218	0.0163122	2.51061	2.51061	52.9538	21.092
ENSG00000269343	ZNF587B	0.304095	0.995699	1.24367	1.24367	50.3444	40.4806	0.350513	0.802906	1.35916	1.35916	50.3444	37.0409	0.364873	0.688447	1.21918	1.21918	50.3444	41.2936
ENSG00000128340	RAC2	0.304395	0.995699	0.730309	-1.36928	249.202	341.229	0.0106462	0.249165	0.298831	-3.34638	249.202	833.925	0.0149372	0.137478	0.461985	-2.16457	249.202	539.417
ENSG00000197302	ZNF720	0.304482	0.995699	1.14523	1.14523	102.604	89.5921	0.152059	0.686753	1.34188	1.34188	102.604	76.4628	0.0665144	0.305551	1.28669	1.28669	102.604	79.7425
ENSG00000059378	PARP12	0.304527	0.995699	1.2528	1.2528	81.9321	65.399	0.220302	0.73603	1.51908	1.51908	81.9321	53.9353	0.107193	0.391447	1.44448	1.44448	81.9321	56.7207
ENSG00000270231	NBPF8	0.30459	0.995699	0.717786	-1.39317	140.257	195.402	0.512393	0.864469	1.3892	1.3892	140.257	100.962	0.740924	0.900201	1.11753	1.11753	140.257	125.507
ENSG00000165943	MOAP1	0.304635	0.995699	0.718672	-1.39145	51.1949	71.2354	0.0869527	0.598733	0.428993	-2.33104	51.1949	119.337	0.12733	0.425642	0.601774	-1.66175	51.1949	85.0734
ENSG00000008018	PSMB1	0.304783	0.995699	0.842162	-1.18742	132.59	157.44	0.0396117	0.441463	0.589742	-1.69566	132.59	224.826	0.00586049	0.0803038	0.62189	-1.608	132.59	213.204
ENSG00000091879	ANGPT2	0.305	0.995699	1.34958	1.34958	34.2374	25.369	0.17059	0.703071	1.8742	1.8742	34.2374	18.2678	0.0814924	0.340094	1.70376	1.70376	34.2374	20.0952
ENSG00000047056	WDR37	0.305084	0.995699	0.76067	-1.31463	35.1545	46.2152	0.568931	0.888653	0.79129	-1.26376	35.1545	44.4269	0.768393	0.912681	0.921274	-1.08545	35.1545	38.1586
ENSG00000117280	RAB29	0.305141	0.995699	1.18124	1.18124	140.74	119.146	0.617704	0.904701	0.883141	-1.13232	140.74	159.363	0.305161	0.63745	0.842926	-1.18634	140.74	166.966
ENSG00000272888	CHASERR	0.305177	0.995699	0.82971	-1.20524	435.024	524.309	0.245505	0.748171	0.72113	-1.38671	435.024	603.254	0.425086	0.730822	0.860084	-1.16268	435.024	505.793
ENSG00000234608	MAPKAPK5-AS1	0.305209	0.995699	0.802974	-1.24537	94.7541	118.004	0.741283	0.936216	0.896503	-1.11545	94.7541	105.693	0.649833	0.859065	0.904014	-1.10618	94.7541	104.815
ENSG00000253304	TMEM200B	0.305678	0.995699	0.788392	-1.2684	547.668	694.664	0.905062	0.974889	1.04383	1.04383	547.668	524.672	0.834247	0.944603	0.950815	-1.05173	547.668	575.998
ENSG00000241058	NSUN6	0.306052	0.995699	1.23074	1.23074	120.463	97.878	0.166348	0.70011	1.54703	1.54703	120.463	77.8671	0.0636435	0.2985	1.4794	1.4794	120.463	81.4265
ENSG00000159079	CFAP298	0.306089	0.995699	0.791027	-1.26418	53.8334	68.0551	0.886372	0.968284	0.950592	-1.05198	53.8334	56.6314	0.735914	0.897721	0.922805	-1.08365	53.8334	58.3367
ENSG00000215302	---	0.306098	0.995699	1.36736	1.36736	32.5008	23.7691	0.731594	0.935277	1.1747	1.1747	32.5008	27.6674	0.0027859	0.0537944	3.20347	3.20347	32.5008	10.1455
ENSG00000168906	MAT2A	0.306195	0.995699	0.797013	-1.25468	110.467	138.602	0.571449	0.889478	1.21547	1.21547	110.467	90.8845	0.133162	0.43351	0.708535	-1.41136	110.467	155.909
ENSG00000155304	HSPA13	0.306598	0.995699	1.27644	1.27644	51.3518	40.2304	0.600319	0.89994	0.826639	-1.20972	51.3518	62.1212	0.235296	0.564049	1.34467	1.34467	51.3518	38.1892
ENSG00000156671	SAMD8	0.306659	0.995699	1.33407	1.33407	24.3245	18.2334	0.0728215	0.566427	2.25317	2.25317	24.3245	10.7957	0.368663	0.691393	1.29808	1.29808	24.3245	18.7389
ENSG00000118454	ANKRD13C	0.306947	0.995699	0.782678	-1.27766	37.2173	47.5512	0.916022	0.979731	0.961577	-1.03996	37.2173	38.7044	0.461436	0.75352	1.20727	1.20727	37.2173	30.8276
ENSG00000069702	TGFBR3	0.306956	0.995699	1.32281	1.32281	67.1487	50.7621	0.265255	0.758779	1.60632	1.60632	67.1487	41.8029	0.00391399	0.0637672	2.3395	2.3395	67.1487	28.7021
ENSG00000069329	VPS35	0.307033	0.995699	1.18469	1.18469	114.482	96.6342	0.825139	0.959937	0.945361	-1.0578	114.482	121.098	0.544914	0.801414	1.10933	1.10933	114.482	103.198
ENSG00000108639	SYNGR2	0.307114	0.995699	1.37561	1.37561	62.6806	45.5657	0.687093	0.927534	1.21415	1.21415	62.6806	51.6251	0.800107	0.927933	1.08492	1.08492	62.6806	57.7743
ENSG00000134884	ARGLU1	0.30727	0.995699	1.21019	1.21019	1473.16	1217.29	0.0649192	0.541774	1.70686	1.70686	1473.16	863.079	0.00506506	0.074649	1.72334	1.72334	1473.16	854.825
ENSG00000060339	CCAR1	0.30781	0.995699	0.866957	-1.15346	554.897	640.052	0.505826	0.860846	1.15537	1.15537	554.897	480.277	0.354491	0.680797	1.14435	1.14435	554.897	484.902
ENSG00000152061	RABGAP1L	0.308036	0.995699	1.21221	1.21221	256.155	211.312	0.17317	0.703428	1.49019	1.49019	256.155	171.894	0.00315009	0.0577804	1.79216	1.79216	256.155	142.93
ENSG00000096060	FKBP5	0.308046	0.995699	0.798098	-1.25298	117.069	146.685	0.301287	0.774069	1.42865	1.42865	117.069	81.9436	0.116372	0.408166	1.44141	1.44141	117.069	81.2179
ENSG00000121486	TRMT1L	0.308268	0.995699	1.21972	1.21972	81.7049	66.9865	0.08913	0.603588	1.67909	1.67909	81.7049	48.6603	0.56017	0.811104	1.12413	1.12413	81.7049	72.6826
ENSG00000130244	FAM98C	0.30858	0.995699	1.30701	1.30701	37.9331	29.0228	0.550343	0.88237	0.78818	-1.26875	37.9331	48.1275	0.41004	0.725113	1.25229	1.25229	37.9331	30.291
ENSG00000100697	DICER1	0.308761	0.995699	1.25944	1.25944	212.273	168.545	0.756354	0.941041	1.11481	1.11481	212.273	190.412	0.415697	0.726797	1.21071	1.21071	212.273	175.329
ENSG00000164463	CREBRF	0.308797	0.995699	1.27175	1.27175	700.753	551.015	0.310109	0.781753	1.44982	1.44982	700.753	483.338	0.323123	0.652017	1.27403	1.27403	700.753	550.026
ENSG00000257315	ZBED6	0.309017	0.995699	1.62284	1.62284	11.0226	6.79216	0.439821	0.834322	1.7704	1.7704	11.0226	6.22604	0.33518	0.664567	1.60433	1.60433	11.0226	6.87055
ENSG00000188612	SUMO2	0.309166	0.995699	1.18752	1.18752	356.062	299.836	0.231088	0.743971	0.732079	-1.36597	356.062	486.371	0.541116	0.798359	1.1131	1.1131	356.062	319.882
ENSG00000055163	CYFIP2	0.309208	0.995699	0.852206	-1.17343	281.501	330.32	0.131879	0.659276	0.693855	-1.44122	281.501	405.705	0.264502	0.593177	0.833629	-1.19958	281.501	337.681
ENSG00000101608	MYL12A	0.309319	0.995699	0.743944	-1.34419	394.734	530.596	0.0644476	0.539914	0.435049	-2.29859	394.734	907.331	0.526667	0.790331	0.825829	-1.2109	394.734	477.985
ENSG00000138459	SLC35A5	0.309818	0.995699	1.51509	1.51509	22.2389	14.6783	0.907102	0.975383	0.929839	-1.07546	22.2389	23.9169	0.835996	0.944836	0.917292	-1.09017	22.2389	24.2441
ENSG00000179715	PCED1B	0.309858	0.995699	1.31648	1.31648	55.3578	42.0498	0.373491	0.816463	0.692716	-1.44359	55.3578	79.9141	0.303721	0.63626	0.752256	-1.32933	55.3578	73.5891
ENSG00000247556	OIP5-AS1	0.3101	0.995699	1.17196	1.17196	541.003	461.62	0.400473	0.827139	1.22568	1.22568	541.003	441.389	0.251684	0.580081	1.20431	1.20431	541.003	449.223
ENSG00000135365	PHF21A	0.310133	0.995699	0.778481	-1.28455	152.77	196.242	0.393808	0.823917	1.38712	1.38712	152.77	110.135	0.93148	0.980261	1.0223	1.0223	152.77	149.438
ENSG00000100410	PHF5A	0.310364	0.995699	1.31024	1.31024	39.7082	30.306	0.390097	0.823695	0.707152	-1.41412	39.7082	56.1522	0.34197	0.670756	0.773201	-1.29332	39.7082	51.3555
ENSG00000148484	RSU1	0.310411	0.995699	0.768577	-1.30111	87.311	113.601	0.795197	0.952056	0.901	-1.10988	87.311	96.9045	0.344966	0.672798	1.29474	1.29474	87.311	67.4353
ENSG00000132819	RBM38	0.310555	0.995699	0.717996	-1.39276	56.9498	79.3177	0.504439	0.860004	0.714025	-1.40051	56.9498	79.7588	0.209728	0.538801	0.654229	-1.52852	56.9498	87.0487
ENSG00000087470	DNM1L	0.31081	0.995699	0.791827	-1.2629	59.9891	75.7604	0.384711	0.819674	1.36823	1.36823	59.9891	43.8443	0.533131	0.795347	1.16233	1.16233	59.9891	51.611
ENSG00000140030	GPR65	0.310855	0.995699	0.817033	-1.22394	55.5626	68.0053	0.42107	0.831134	0.781589	-1.27944	55.5626	71.0892	0.138668	0.441175	0.737797	-1.35539	55.5626	75.3088
ENSG00000126777	KTN1	0.310997	0.995699	1.19873	1.19873	583.314	486.609	0.710847	0.934449	1.10809	1.10809	583.314	526.415	0.734376	0.897721	1.06496	1.06496	583.314	547.735
ENSG00000137955	RABGGTB	0.31107	0.995699	1.32672	1.32672	93.4218	70.4157	0.653391	0.915877	1.21358	1.21358	93.4218	76.9802	0.0545541	0.277562	1.75436	1.75436	93.4218	53.2511
ENSG00000099204	ABLIM1	0.311151	0.995699	0.835886	-1.19634	236.248	282.632	0.415513	0.830537	0.800384	-1.2494	236.248	295.168	0.187571	0.508106	0.785333	-1.27334	236.248	300.825
ENSG00000216937	CCDC7	0.31117	0.995699	0.804808	-1.24253	106.585	132.435	0.985757	0.995918	1.00595	1.00595	106.585	105.955	0.447888	0.743969	1.18594	1.18594	106.585	89.8742
ENSG00000068745	IP6K2	0.311192	0.995699	1.21899	1.21899	54.1698	44.4383	0.828437	0.960175	0.937527	-1.06664	54.1698	57.7794	0.89779	0.971679	0.974685	-1.02597	54.1698	55.5767
ENSG00000137161	CNPY3	0.311232	0.995699	0.755453	-1.32371	36.8801	48.8185	0.452662	0.83736	0.72615	-1.37713	36.8801	50.7885	0.186038	0.506284	0.685242	-1.45934	36.8801	53.8206
ENSG00000108298	RPL19	0.311379	0.995699	0.813228	-1.22967	945.36	1162.48	0.00216348	0.129169	0.37949	-2.63512	945.36	2491.13	0.0541102	0.277475	0.664848	-1.5041	945.36	1421.92
ENSG00000178761	FAM219B	0.31171	0.995699	0.70259	-1.4233	28.4242	40.4564	0.0915475	0.608336	2.58779	2.58779	28.4242	10.984	0.923931	0.979548	0.965769	-1.03544	28.4242	29.4317
ENSG00000023171	GRAMD1B	0.311716	0.995699	0.751519	-1.33064	9.96658	13.2619	0.193295	0.718905	0.578085	-1.72985	9.96658	17.2407	0.147303	0.456016	0.659102	-1.51722	9.96658	15.1215
ENSG00000196510	ANAPC7	0.311762	0.995699	0.833848	-1.19926	42.2555	50.6753	0.761623	0.942765	1.08864	1.08864	42.2555	38.8149	0.338321	0.668305	0.837641	-1.19383	42.2555	50.4458
ENSG00000142676	RPL11	0.311844	0.995699	0.816214	-1.22517	2378.82	2914.45	0.000227304	0.0698561	0.317877	-3.14587	2378.82	7483.44	0.00120815	0.0322481	0.509383	-1.96316	2378.82	4670
ENSG00000011198	ABHD5	0.311942	0.995699	1.2887	1.2887	75.182	58.3396	0.0860851	0.597362	1.96168	1.96168	75.182	38.3253	0.125082	0.422244	1.4913	1.4913	75.182	50.4138
ENSG00000197808	ZNF461	0.311956	0.995699	0.752995	-1.32803	16.7798	22.2841	0.566361	0.888413	1.29082	1.29082	16.7798	12.9994	0.0360635	0.226403	2.17193	2.17193	16.7798	7.72573
ENSG00000070669	ASNS	0.3121	0.995699	0.774762	-1.29072	59.8384	77.2346	0.158124	0.695105	1.75444	1.75444	59.8384	34.1069	0.650197	0.859065	0.887883	-1.12627	59.8384	67.3945
ENSG00000100883	SRP54	0.312231	0.995699	1.18577	1.18577	85.7217	72.2922	0.972892	0.992224	1.00882	1.00882	85.7217	84.9726	0.599564	0.831254	1.09548	1.09548	85.7217	78.2507
ENSG00000280433	---	0.312643	0.995699	0.720487	-1.38795	98.504	136.719	0.341867	0.799323	1.61761	1.61761	98.504	60.8949	0.868759	0.959176	1.05741	1.05741	98.504	93.1563
ENSG00000132965	ALOX5AP	0.312894	0.995699	1.265	1.265	104.004	82.2167	0.472383	0.847468	0.773564	-1.29272	104.004	134.448	0.616454	0.840092	1.12839	1.12839	104.004	92.1703
ENSG00000072778	ACADVL	0.313559	0.995699	1.29759	1.29759	25.9407	19.9915	0.739017	0.936216	1.14071	1.14071	25.9407	22.7409	0.00398766	0.0642749	2.52406	2.52406	25.9407	10.2774
ENSG00000116539	ASH1L	0.31369	0.995699	1.25806	1.25806	405.79	322.553	0.128402	0.654399	1.71158	1.71158	405.79	237.085	0.189724	0.512265	1.36358	1.36358	405.79	297.591
ENSG00000115282	TTC31	0.314018	0.995699	0.827523	-1.20842	27.3682	33.0724	0.877275	0.966954	1.0463	1.0463	27.3682	26.157	0.502582	0.775886	0.87792	-1.13906	27.3682	31.1739
ENSG00000125835	SNRPB	0.314227	0.995699	1.30813	1.30813	58.02	44.3533	0.23688	0.745985	0.618532	-1.61673	58.02	93.8027	0.646289	0.858252	0.881878	-1.13394	58.02	65.7914
ENSG00000175265	GOLGA8A	0.314268	0.995699	0.827916	-1.20785	643.01	776.66	0.241183	0.746139	1.40672	1.40672	643.01	457.1	0.992009	0.997605	0.99805	-1.00195	643.01	644.266
ENSG00000085382	HACE1	0.314474	0.995699	1.3351	1.3351	38.654	28.9521	0.0634548	0.539642	2.33057	2.33057	38.654	16.5856	0.291443	0.623583	1.3682	1.3682	38.654	28.2516
ENSG00000165915	SLC39A13	0.314521	0.995699	0.713216	-1.4021	33.1699	46.5075	0.788673	0.950078	0.869877	-1.14959	33.1699	38.1317	0.492561	0.769118	0.787215	-1.2703	33.1699	42.1358
ENSG00000197006	METTL9	0.314862	0.995699	1.20572	1.20572	119.179	98.8442	0.876352	0.966887	0.956483	-1.0455	119.179	124.601	0.0440212	0.248858	1.48249	1.48249	119.179	80.3906
ENSG00000288596	C8orf44	0.315267	0.995699	0.703884	-1.42069	49.8184	70.7765	0.204117	0.726513	2.01171	2.01171	49.8184	24.7642	0.829207	0.942703	1.08184	1.08184	49.8184	46.0496
ENSG00000111676	ATN1	0.31554	0.995699	0.698507	-1.43163	14.3831	20.5912	0.134008	0.661054	2.43392	2.43392	14.3831	5.90944	0.4538	0.747289	1.332	1.332	14.3831	10.7981
ENSG00000129003	VPS13C	0.315597	0.995699	1.16042	1.16042	510.203	439.673	0.285423	0.761943	1.27797	1.27797	510.203	399.229	0.0160775	0.142314	1.44973	1.44973	510.203	351.931
ENSG00000124802	EEF1E1	0.315705	0.995699	0.726423	-1.37661	65.0151	89.5003	0.710696	0.934449	0.832911	-1.20061	65.0151	78.0577	0.601534	0.832989	0.841302	-1.18863	65.0151	77.2791
ENSG00000158869	FCER1G	0.315826	0.995699	0.725749	-1.37789	40.9726	56.4557	0.00307497	0.160759	0.235999	-4.23731	40.9726	173.614	0.00545422	0.0774579	0.400744	-2.49536	40.9726	102.241
ENSG00000155393	HEATR3	0.315923	0.995699	0.771001	-1.29702	55.722	72.2723	0.280816	0.760636	1.55168	1.55168	55.722	35.9108	0.0227227	0.175628	1.91107	1.91107	55.722	29.1574
ENSG00000100578	KIAA0586	0.315944	0.995699	1.21111	1.21111	168.336	138.993	0.145629	0.679713	1.53995	1.53995	168.336	109.313	0.162823	0.478732	1.31855	1.31855	168.336	127.668
ENSG00000198862	LTN1	0.315951	0.995699	1.21076	1.21076	152.275	125.768	0.327842	0.79156	1.33513	1.33513	152.275	114.053	0.0306473	0.208266	1.53806	1.53806	152.275	99.0043
ENSG00000215421	ZNF407	0.315978	0.995699	1.25338	1.25338	81.0392	64.6566	0.0917916	0.608336	1.81067	1.81067	81.0392	44.7565	0.00240539	0.0493823	2.07137	2.07137	81.0392	39.1234
ENSG00000143771	CNIH4	0.316418	0.995699	1.22353	1.22353	53.8375	44.0017	0.977258	0.994597	0.991273	-1.0088	53.8375	54.3115	0.711699	0.885237	0.926965	-1.07879	53.8375	58.0794
ENSG00000135049	AGTPBP1	0.316499	0.995699	1.24325	1.24325	98.0644	78.8772	0.628366	0.909656	1.17629	1.17629	98.0644	83.3676	0.266496	0.596051	1.28459	1.28459	98.0644	76.3388
ENSG00000168028	RPSA	0.316697	0.995699	0.833189	-1.20021	306.54	367.912	0.000236695	0.0698561	0.356305	-2.80658	306.54	860.331	0.0129289	0.129279	0.625387	-1.59901	306.54	490.161
ENSG00000141627	DYM	0.316711	0.995699	1.24524	1.24524	74.9641	60.2006	0.449718	0.836693	1.29175	1.29175	74.9641	58.0331	0.000162361	0.0109193	2.56285	2.56285	74.9641	29.2502
ENSG00000131507	NDFIP1	0.316867	0.995699	0.7854	-1.27324	192.161	244.667	0.175409	0.704898	0.603446	-1.65715	192.161	318.439	0.394534	0.713493	0.807896	-1.23778	192.161	237.854
ENSG00000118058	KMT2A	0.317025	0.995699	1.30998	1.30998	654.747	499.816	0.209555	0.729879	1.69012	1.69012	654.747	387.396	0.35971	0.685559	1.29238	1.29238	654.747	506.621
ENSG00000167286	CD3D	0.317037	0.995699	0.768965	-1.30045	178.687	232.373	0.00326954	0.163078	0.304035	-3.28909	178.687	587.717	0.108392	0.392939	0.645664	-1.54879	178.687	276.749
ENSG00000138399	FASTKD1	0.317155	0.995699	1.26534	1.26534	46.9331	37.0913	0.0348555	0.41778	2.20393	2.20393	46.9331	21.2952	0.983009	0.996826	0.99487	-1.00516	46.9331	47.1751
ENSG00000089486	CDIP1	0.317246	0.995699	0.788334	-1.2685	19.9051	25.2496	0.220404	0.73603	0.643731	-1.55344	19.9051	30.9215	0.759499	0.90783	1.08269	1.08269	19.9051	18.3849
ENSG00000206190	ATP10A	0.317575	0.995699	0.801223	-1.24809	29.2465	36.5024	0.806188	0.954298	0.919406	-1.08766	29.2465	31.8103	0.742275	0.900317	0.926822	-1.07896	29.2465	31.5557
ENSG00000175155	YPEL2	0.31788	0.995699	0.826702	-1.20963	108.483	131.223	0.672281	0.922494	1.1334	1.1334	108.483	95.7147	0.422277	0.728618	1.17363	1.17363	108.483	92.4332
ENSG00000144354	CDCA7	0.318047	0.995699	1.47349	1.47349	67.7055	45.949	0.469201	0.847468	1.54519	1.54519	67.7055	43.817	0.560153	0.811104	1.26359	1.26359	67.7055	53.582
ENSG00000160299	PCNT	0.31815	0.995699	1.3121	1.3121	143.597	109.441	0.147757	0.680157	1.84452	1.84452	143.597	77.8507	0.140084	0.443137	1.5173	1.5173	143.597	94.6396
ENSG00000116754	SRSF11	0.319208	0.995699	0.847697	-1.17967	1428.31	1684.93	0.344299	0.799577	1.27527	1.27527	1428.31	1120	0.953751	0.986215	0.990062	-1.01004	1428.31	1442.65
ENSG00000110852	CLEC2B	0.32015	0.995699	0.747512	-1.33777	101.662	136	0.133121	0.659276	0.507624	-1.96996	101.662	200.27	0.130255	0.429254	0.631999	-1.58228	101.662	160.858
ENSG00000153574	RPIA	0.32038	0.995699	0.779894	-1.28223	36.5371	46.8489	0.0478547	0.483738	0.471352	-2.12156	36.5371	77.5156	0.0627028	0.297316	0.619436	-1.61437	36.5371	58.9845
ENSG00000115415	STAT1	0.320392	0.995699	1.18045	1.18045	415.424	351.92	0.110185	0.636173	1.51246	1.51246	415.424	274.667	0.992325	0.997605	1.00166	1.00166	415.424	414.734
ENSG00000077232	DNAJC10	0.320621	0.995699	1.16116	1.16116	125.62	108.185	0.929172	0.982844	1.02075	1.02075	125.62	123.066	0.513877	0.7823	1.10673	1.10673	125.62	113.506
ENSG00000213024	NUP62	0.320646	0.995699	1.20649	1.20649	81.0859	67.2082	0.148013	0.680301	1.5313	1.5313	81.0859	52.9523	0.663325	0.863647	1.08835	1.08835	81.0859	74.5034
ENSG00000213551	DNAJC9	0.320734	0.995699	0.795589	-1.25693	57.5017	72.2757	0.538619	0.878334	0.803915	-1.24391	57.5017	71.5271	0.676958	0.870398	0.905018	-1.10495	57.5017	63.5365
ENSG00000165525	NEMF	0.32134	0.995699	0.844629	-1.18395	486.533	576.031	0.506908	0.861435	1.19153	1.19153	486.533	408.327	0.24451	0.574088	1.2291	1.2291	486.533	395.844
ENSG00000271601	LIX1L	0.321732	0.995699	0.720719	-1.3875	67.9742	94.3144	0.616135	0.904701	0.773952	-1.29207	67.9742	87.8273	0.581858	0.821809	0.827737	-1.20811	67.9742	82.1205
ENSG00000112130	RNF8	0.322092	0.995699	1.27162	1.27162	52.3107	41.1372	0.754944	0.940625	1.12347	1.12347	52.3107	46.5616	0.0280054	0.196947	1.76765	1.76765	52.3107	29.5933
ENSG00000100106	TRIOBP	0.322299	0.995699	0.79524	-1.25748	22.7735	28.6372	0.231183	0.743971	0.657114	-1.52181	22.7735	34.6568	0.190985	0.514481	0.732778	-1.36467	22.7735	31.0783
ENSG00000132275	RRP8	0.322466	0.995699	0.724418	-1.38042	44.1946	61.0071	0.89518	0.97173	0.935638	-1.06879	44.1946	47.2348	0.0293881	0.202771	2.32358	2.32358	44.1946	19.0201
ENSG00000151498	ACAD8	0.322633	0.995699	0.767659	-1.30266	31.5544	41.1048	0.779291	0.945465	1.12396	1.12396	31.5544	28.0742	0.742288	0.900317	0.912642	-1.09572	31.5544	34.5748
ENSG00000152404	CWF19L2	0.322801	0.995699	0.841899	-1.18779	468.384	556.342	0.234465	0.745169	1.37892	1.37892	468.384	339.674	0.178744	0.495704	0.7845	-1.2747	468.384	597.048
ENSG00000171503	ETFDH	0.32304	0.995699	0.802276	-1.24645	82.1869	102.442	0.345781	0.799934	1.38881	1.38881	82.1869	59.178	0.173758	0.49114	1.377	1.377	82.1869	59.6853
ENSG00000115170	ACVR1	0.323311	0.995699	1.26417	1.26417	44.4899	35.1929	0.45007	0.836693	1.31929	1.31929	44.4899	33.7225	0.665847	0.864662	1.11091	1.11091	44.4899	40.0483
ENSG00000170836	PPM1D	0.323412	0.995699	0.763363	-1.30999	26.9079	35.2491	0.806724	0.954298	1.11005	1.11005	26.9079	24.2403	0.988625	0.997146	0.99593	-1.00409	26.9079	27.0178
ENSG00000143727	ACP1	0.323686	0.995699	0.767074	-1.30366	120.082	156.546	0.531205	0.873792	0.770953	-1.2971	120.082	155.758	0.578813	0.821002	0.856504	-1.16754	120.082	140.2
ENSG00000111530	CAND1	0.323822	0.995699	0.855723	-1.1686	178.407	208.486	0.246107	0.748428	1.33033	1.33033	178.407	134.107	0.932681	0.980261	0.986246	-1.01395	178.407	180.895
ENSG00000120333	MRPS14	0.323918	0.995699	1.27193	1.27193	40.8546	32.1203	0.733293	0.936216	0.88134	-1.13464	40.8546	46.3551	0.0289935	0.200758	1.79195	1.79195	40.8546	22.799
ENSG00000196367	TRRAP	0.324289	0.995699	1.24945	1.24945	74.5837	59.6934	0.0215286	0.345107	2.27319	2.27319	74.5837	32.8102	0.0416366	0.243195	1.61658	1.61658	74.5837	46.1368
ENSG00000173846	PLK3	0.324376	0.995699	0.834584	-1.1982	71.6464	85.8469	0.688911	0.928099	1.12105	1.12105	71.6464	63.9101	0.995843	0.998231	0.999005	-1.001	71.6464	71.7178
ENSG00000064313	TAF2	0.324441	0.995699	1.20884	1.20884	96.4449	79.7832	0.129681	0.655708	1.57534	1.57534	96.4449	61.2217	0.0152309	0.13827	1.6329	1.6329	96.4449	59.0636
ENSG00000182831	C16orf72	0.324584	0.995699	0.802067	-1.24678	70.7895	88.2589	0.4362	0.833814	1.31297	1.31297	70.7895	53.9155	0.849393	0.950794	1.0453	1.0453	70.7895	67.7214
ENSG00000172340	SUCLG2	0.324626	0.995699	0.794082	-1.25932	92.2616	116.186	0.825182	0.959937	0.923101	-1.08331	92.2616	99.9475	0.0761071	0.326708	1.56147	1.56147	92.2616	59.0863
ENSG00000253341	PCBP2P2	0.325191	0.995699	1.30985	1.30985	31.4576	24.0163	0.803879	0.953302	1.10994	1.10994	31.4576	28.3416	0.0890116	0.357452	1.64114	1.64114	31.4576	19.1682
ENSG00000083845	RPS5	0.325242	0.995699	0.803043	-1.24526	374.185	465.959	0.00579533	0.206714	0.386628	-2.58647	374.185	967.816	0.133194	0.43351	0.706453	-1.41552	374.185	529.667
ENSG00000180747	SMG1P3	0.325302	0.995699	1.46662	1.46662	111.456	75.9955	0.250885	0.749787	2.00186	2.00186	111.456	55.6764	0.00109797	0.0309973	3.98231	3.98231	111.456	27.9879
ENSG00000136044	APPL2	0.325536	0.995699	1.19305	1.19305	52.9555	44.3867	0.306998	0.778391	1.329	1.329	52.9555	39.8461	0.0702857	0.312291	1.40545	1.40545	52.9555	37.6788
ENSG00000242125	SNHG3	0.325639	0.995699	0.718946	-1.39092	50.2928	69.9534	0.0356325	0.420386	0.338685	-2.9526	50.2928	148.494	0.0965139	0.371271	0.561311	-1.78154	50.2928	89.5987
ENSG00000263276	---	0.325993	0.995699	0.490239	-2.03982	36.0912	73.6195	0.653642	0.915877	0.603969	-1.65572	36.0912	59.7567	0.0703071	0.312291	0.256121	-3.9044	36.0912	140.914
ENSG00000147677	EIF3H	0.326269	0.995699	0.808934	-1.23619	139.732	172.736	0.13138	0.659276	0.605244	-1.65223	139.732	230.869	0.586555	0.824135	0.885013	-1.12993	139.732	157.887
ENSG00000089818	NECAP1	0.32629	0.995699	0.780481	-1.28126	36.6216	46.9219	0.898385	0.971977	1.0514	1.0514	36.6216	34.8313	0.30662	0.639585	0.766021	-1.30545	36.6216	47.8076
ENSG00000175792	RUVBL1	0.326346	0.995699	0.822036	-1.21649	34.2508	41.6658	0.151049	0.684336	0.647705	-1.54391	34.2508	52.8802	0.516941	0.783704	1.15167	1.15167	34.2508	29.7402
ENSG00000126226	PCID2	0.326449	0.995699	0.795515	-1.25705	76.1901	95.7746	0.647844	0.914046	0.848327	-1.17879	76.1901	89.8121	0.806457	0.930139	1.06157	1.06157	76.1901	71.771
ENSG00000165879	FRAT1	0.326604	0.995699	0.764107	-1.30872	27.2685	35.6867	0.316409	0.785451	1.5475	1.5475	27.2685	17.621	0.369349	0.691579	0.775093	-1.29017	27.2685	35.1809
ENSG00000069020	MAST4	0.326853	0.995699	0.864108	-1.15726	129.987	150.429	0.714198	0.934449	1.08834	1.08834	129.987	119.437	0.598458	0.830347	0.92194	-1.08467	129.987	140.993
ENSG00000115806	GORASP2	0.326991	0.995699	0.851194	-1.17482	75.4081	88.5909	0.193792	0.719008	0.7214	-1.38619	75.4081	104.53	0.049916	0.265267	0.718266	-1.39224	75.4081	104.986
ENSG00000257103	LSM14A	0.32708	0.995699	1.19835	1.19835	197.118	164.491	0.429302	0.832061	0.798964	-1.25162	197.118	246.717	0.596622	0.829374	1.10656	1.10656	197.118	178.135
ENSG00000267049	---	0.327089	0.995699	1.24879	1.24879	18.3969	14.7318	0.536231	0.876751	1.24051	1.24051	18.3969	14.8302	0.0485515	0.261579	0.645712	-1.54868	18.3969	28.4909
ENSG00000080371	RAB21	0.327091	0.995699	1.12017	1.12017	220.836	197.146	0.194475	0.719261	1.26207	1.26207	220.836	174.979	0.564063	0.81329	1.07134	1.07134	220.836	206.131
ENSG00000117450	PRDX1	0.327106	0.995699	1.29899	1.29899	130.088	100.146	0.916629	0.979758	0.957824	-1.04403	130.088	135.817	0.308676	0.641121	1.32603	1.32603	130.088	98.1035
ENSG00000138095	LRPPRC	0.327221	0.995699	1.20441	1.20441	170.81	141.821	0.540253	0.878577	1.19689	1.19689	170.81	142.712	0.557623	0.810615	1.12204	1.12204	170.81	152.231
ENSG00000132950	ZMYM5	0.32728	0.995699	1.28806	1.28806	41.8116	32.4609	0.0309543	0.402036	2.4391	2.4391	41.8116	17.1422	0.0010268	0.0297417	2.54604	2.54604	41.8116	16.4222
ENSG00000162924	REL	0.327624	0.995699	1.29895	1.29895	322.448	248.238	0.285698	0.761943	1.556	1.556	322.448	207.229	0.0104034	0.113777	2.04243	2.04243	322.448	157.875
ENSG00000071994	PDCD2	0.327725	0.995699	0.778378	-1.28472	80.1357	102.952	0.202011	0.72456	0.604812	-1.65341	80.1357	132.497	0.243037	0.572238	0.733718	-1.36292	80.1357	109.219
ENSG00000123219	CENPK	0.327844	0.995699	0.778313	-1.28483	150.936	193.927	0.414526	0.830537	1.38401	1.38401	150.936	109.057	0.274775	0.605285	1.33947	1.33947	150.936	112.683
ENSG00000049860	HEXB	0.328004	0.995699	0.810688	-1.23352	40.1542	49.531	0.260539	0.754608	0.691616	-1.44589	40.1542	58.0586	0.0596168	0.289716	0.660874	-1.51315	40.1542	60.7592
ENSG00000169599	NFU1	0.328085	0.995699	0.687719	-1.45408	34.8384	50.6579	0.482741	0.854501	0.660611	-1.51375	34.8384	52.7366	0.710711	0.884572	0.862438	-1.1595	34.8384	40.3952
ENSG00000138795	LEF1	0.328189	0.995699	0.797676	-1.25364	511.053	640.678	0.197658	0.722415	0.630744	-1.58543	511.053	810.239	0.193234	0.516173	0.731898	-1.36631	511.053	698.258
ENSG00000094880	CDC23	0.328372	0.995699	1.40864	1.40864	54.3638	38.593	0.41045	0.830537	1.56397	1.56397	54.3638	34.7601	0.657537	0.86071	1.17399	1.17399	54.3638	46.307
ENSG00000169032	MAP2K1	0.328449	0.995699	1.33653	1.33653	84.1091	62.931	0.505413	0.860643	0.738183	-1.35468	84.1091	113.941	0.301806	0.634518	1.37621	1.37621	84.1091	61.1163
ENSG00000198830	HMGN2	0.32846	0.995699	0.814967	-1.22704	670.919	823.248	0.0141947	0.282592	0.451986	-2.21246	670.919	1484.38	0.031917	0.212212	0.627522	-1.59357	670.919	1069.16
ENSG00000107372	ZFAND5	0.328572	0.995699	0.781545	-1.27952	170.235	217.818	0.437274	0.833814	0.73859	-1.35393	170.235	230.486	0.124369	0.421601	0.669186	-1.49435	170.235	254.391
ENSG00000102738	MRPS31	0.328653	0.995699	1.24155	1.24155	121.852	98.145	0.547801	0.881791	1.22849	1.22849	121.852	99.1887	0.513327	0.782209	1.16155	1.16155	121.852	104.905
ENSG00000198879	SFMBT2	0.32866	0.995699	1.30242	1.30242	41.4409	31.8183	0.111653	0.636173	1.96845	1.96845	41.4409	21.0525	0.0349893	0.222555	1.82392	1.82392	41.4409	22.7208
ENSG00000012660	ELOVL5	0.328785	0.995699	0.761595	-1.31303	164.211	215.615	0.433063	0.833814	0.713115	-1.4023	164.211	230.273	0.486751	0.768843	0.817627	-1.22305	164.211	200.839
ENSG00000019485	PRDM11	0.329002	0.995699	1.37931	1.37931	14.8008	10.7305	0.0659201	0.546316	2.72063	2.72063	14.8008	5.44021	0.00269563	0.0531048	4.11699	4.11699	14.8008	3.59505
ENSG00000070476	ZXDC	0.329142	0.995699	1.18147	1.18147	64.0276	54.1932	0.212424	0.733853	1.39309	1.39309	64.0276	45.9608	0.0997592	0.37902	1.34023	1.34023	64.0276	47.7736
ENSG00000276045	ORAI1	0.329162	0.995699	0.738856	-1.35344	82.9977	112.333	0.930469	0.982844	1.04287	1.04287	82.9977	79.586	0.710672	0.884572	0.887354	-1.12695	82.9977	93.534
ENSG00000173214	MFSD4B	0.329576	0.995699	0.787166	-1.27038	82.6793	105.034	0.215639	0.733853	1.60989	1.60989	82.6793	51.3572	0.779978	0.918603	0.931254	-1.07382	82.6793	88.7828
ENSG00000237049	RPL34P1	0.329673	0.995699	0.765588	-1.30619	73.2881	95.7279	0.799727	0.953129	0.897991	-1.1136	73.2881	81.6134	0.421811	0.728459	1.26099	1.26099	73.2881	58.1195
ENSG00000141232	TOB1	0.329917	0.995699	0.786076	-1.27214	98.3909	125.167	0.311748	0.783848	0.680145	-1.47028	98.3909	144.662	0.779897	0.918603	0.930635	-1.07453	98.3909	105.724
ENSG00000138594	TMOD3	0.330289	0.995699	0.848831	-1.17809	187.974	221.45	0.690466	0.929143	1.1096	1.1096	187.974	169.407	0.68721	0.875355	1.07312	1.07312	187.974	175.166
ENSG00000146556	WASH2P	0.330604	0.995699	0.707908	-1.41261	15.8675	22.4147	0.897466	0.97173	1.07406	1.07406	15.8675	14.7734	0.647759	0.858252	0.844773	-1.18375	15.8675	18.7832
ENSG00000157540	DYRK1A	0.33062	0.995699	1.16999	1.16999	202.075	172.716	0.698862	0.931483	1.10116	1.10116	202.075	183.511	0.547392	0.802488	1.10566	1.10566	202.075	182.765
ENSG00000054116	TRAPPC3	0.330742	0.995699	1.27626	1.27626	73.6948	57.7429	0.603162	0.901684	0.818984	-1.22102	73.6948	89.9832	0.232442	0.561064	0.735742	-1.35917	73.6948	100.164
ENSG00000074356	NCBP3	0.330749	0.995699	1.19978	1.19978	125.289	104.427	0.239536	0.745985	1.40733	1.40733	125.289	89.0259	0.802872	0.928706	1.04939	1.04939	125.289	119.392
ENSG00000132581	SDF2	0.330889	0.995699	1.2807	1.2807	34.4276	26.8819	0.876282	0.966887	0.941524	-1.06211	34.4276	36.5658	0.758319	0.907347	1.08354	1.08354	34.4276	31.7733
ENSG00000122359	ANXA11	0.330931	0.995699	0.823154	-1.21484	210.173	255.326	0.360931	0.807282	0.753875	-1.32648	210.173	278.79	0.139333	0.442582	0.736008	-1.35868	210.173	285.557
ENSG00000006607	FARP2	0.331095	0.995699	1.37602	1.37602	19.0201	13.8225	0.279512	0.760636	1.7448	1.7448	19.0201	10.901	0.111232	0.397671	1.73424	1.73424	19.0201	10.9674
ENSG00000107560	RAB11FIP2	0.331101	0.995699	1.17304	1.17304	77.8965	66.4059	0.111614	0.636173	1.50415	1.50415	77.8965	51.7877	0.0245048	0.183113	1.47328	1.47328	77.8965	52.8727
ENSG00000135387	CAPRIN1	0.331259	0.995699	1.19403	1.19403	89.2437	74.7414	0.359517	0.807282	1.29545	1.29545	89.2437	68.8899	0.23167	0.560397	1.25378	1.25378	89.2437	71.1797
ENSG00000140612	SEC11A	0.331363	0.995699	0.805593	-1.24132	127.111	157.786	0.00528778	0.202214	0.385502	-2.59402	127.111	329.73	0.00583267	0.080193	0.530608	-1.88463	127.111	239.558
ENSG00000113916	BCL6	0.331643	0.995699	1.30413	1.30413	66.5791	51.0527	0.0390601	0.437817	2.43502	2.43502	66.5791	27.3423	0.415245	0.726797	1.25935	1.25935	66.5791	52.8677
ENSG00000156804	FBXO32	0.331669	0.995699	1.17906	1.17906	82.5431	70.0074	0.390098	0.823695	1.2529	1.2529	82.5431	65.8815	0.877671	0.963823	0.973613	-1.0271	82.5431	84.7802
ENSG00000104763	ASAH1	0.331799	0.995699	1.19429	1.19429	75.0918	62.8757	0.667083	0.92101	0.886896	-1.12753	75.0918	84.6681	0.779039	0.918428	0.948798	-1.05396	75.0918	79.1441
ENSG00000174456	C12orf76	0.3318	0.995699	1.42038	1.42038	36.0334	25.3689	0.596694	0.899499	0.746782	-1.33908	36.0334	48.2515	0.512759	0.782209	1.27811	1.27811	36.0334	28.1927
ENSG00000112514	CUTA	0.331928	0.995699	0.75786	-1.31951	56.5661	74.6392	0.0138946	0.281831	0.340909	-2.93333	56.5661	165.927	0.0496017	0.264557	2.09392	2.09392	56.5661	27.0145
ENSG00000059804	SLC2A3	0.332	0.995699	0.760434	-1.31504	338.109	444.626	0.314349	0.785451	1.55411	1.55411	338.109	217.557	0.776361	0.917271	1.08689	1.08689	338.109	311.079
ENSG00000177666	PNPLA2	0.332	0.995699	0.782841	-1.2774	20.5564	26.2588	0.458916	0.841891	1.34609	1.34609	20.5564	15.2713	0.19841	0.525055	0.716471	-1.39573	20.5564	28.6912
ENSG00000176868	---	0.332394	0.995699	0.769125	-1.30018	69.6874	90.6062	0.77575	0.945308	1.12734	1.12734	69.6874	61.8158	0.803423	0.928706	1.07287	1.07287	69.6874	64.9545
ENSG00000179562	GCC1	0.332486	0.995699	0.787438	-1.26994	78.4389	99.6127	0.900785	0.973133	0.95351	-1.04876	78.4389	82.2633	0.0247175	0.18353	0.564669	-1.77095	78.4389	138.911
ENSG00000133313	CNDP2	0.333133	0.995699	0.816027	-1.22545	69.413	85.0622	0.903137	0.97442	1.04045	1.04045	69.413	66.7142	0.0950787	0.367598	0.696657	-1.43543	69.413	99.6373
ENSG00000127314	RAP1B	0.333596	0.995699	0.85905	-1.16408	385.979	449.31	0.00920349	0.239961	0.532097	-1.87936	385.979	725.393	0.682033	0.873607	0.935217	-1.06927	385.979	412.716
ENSG00000145354	CISD2	0.333749	0.995699	1.24426	1.24426	56.4308	45.3528	0.66699	0.92101	0.862137	-1.15991	56.4308	65.4545	0.510235	0.780262	0.858984	-1.16417	56.4308	65.6948
ENSG00000072756	TRNT1	0.33379	0.995699	1.19972	1.19972	69.6604	58.0638	0.379119	0.817243	1.29226	1.29226	69.6604	53.9059	0.00022791	0.0133132	2.18536	2.18536	69.6604	31.8759
ENSG00000266402	SNHG25	0.333949	0.995699	1.37264	1.37264	171.795	125.157	0.113663	0.636173	0.449653	-2.22394	171.795	382.062	0.643318	0.857416	1.17084	1.17084	171.795	146.728
ENSG00000128915	ICE2	0.333959	0.995699	0.874233	-1.14386	124.369	142.261	0.418089	0.831134	1.19181	1.19181	124.369	104.353	0.405915	0.721449	0.887375	-1.12692	124.369	140.154
ENSG00000075785	RAB7A	0.334054	0.995699	0.791565	-1.26332	158.369	200.071	0.172294	0.703071	0.600646	-1.66487	158.369	263.664	0.103324	0.384347	0.66479	-1.50424	158.369	238.224
ENSG00000132849	PATJ	0.334241	0.995699	1.33297	1.33297	57.5451	43.1705	0.713889	0.934449	1.18324	1.18324	57.5451	48.6337	0.936645	0.982135	1.02465	1.02465	57.5451	56.1607
ENSG00000091592	NLRP1	0.334714	0.995699	0.830085	-1.2047	164.066	197.65	0.111967	0.636173	1.61526	1.61526	164.066	101.573	0.755071	0.906426	1.06463	1.06463	164.066	154.106
ENSG00000162777	DENND2D	0.335531	0.995699	0.780124	-1.28185	69.3427	88.8867	0.115377	0.639005	0.536011	-1.86563	69.3427	129.368	0.290914	0.623583	0.753964	-1.32632	69.3427	91.9709
ENSG00000132388	UBE2G1	0.335596	0.995699	0.771549	-1.29609	91.5849	118.703	0.274671	0.760636	0.635217	-1.57427	91.5849	144.179	0.110711	0.397433	0.641125	-1.55976	91.5849	142.85
ENSG00000144136	SLC20A1	0.335671	0.995699	0.821299	-1.21758	188.234	229.191	0.98062	0.995465	1.00772	1.00772	188.234	186.791	0.212868	0.543407	0.768063	-1.30198	188.234	245.076
ENSG00000114933	INO80D	0.335835	0.995699	1.16636	1.16636	233.193	199.932	0.430176	0.832061	1.21548	1.21548	233.193	191.853	0.431389	0.734919	1.13912	1.13912	233.193	204.713
ENSG00000153234	NR4A2	0.336203	0.995699	0.741404	-1.34879	45.9751	62.0109	0.0782937	0.577294	0.431698	-2.31643	45.9751	106.498	0.60547	0.833561	1.18895	1.18895	45.9751	38.6685
ENSG00000213614	HEXA	0.336551	0.995699	1.20997	1.20997	64.2671	53.1145	0.772204	0.944267	0.916102	-1.09158	64.2671	70.1528	0.705353	0.883425	1.08026	1.08026	64.2671	59.4924
ENSG00000263126	---	0.336589	0.995699	0.778895	-1.28387	60.8924	78.178	0.933529	0.982844	0.966958	-1.03417	60.8924	62.9732	0.686131	0.875355	0.896592	-1.11534	60.8924	67.9155
ENSG00000188283	ZNF383	0.336713	0.995699	1.19822	1.19822	35.9679	30.0179	0.21447	0.733853	1.44121	1.44121	35.9679	24.9568	0.963127	0.988815	1.00886	1.00886	35.9679	35.652
ENSG00000288847	---	0.336749	0.995699	1.29786	1.29786	40.1166	30.9098	0.526672	0.870736	1.30382	1.30382	40.1166	30.7685	0.202764	0.530341	1.43274	1.43274	40.1166	27.9999
ENSG00000179335	CLK3	0.336965	0.995699	1.38944	1.38944	103.098	74.2008	0.0805205	0.585249	2.54589	2.54589	103.098	40.4958	0.0928292	0.364166	1.82005	1.82005	103.098	56.6457
ENSG00000196233	LCOR	0.336967	0.995699	1.14617	1.14617	217.672	189.913	0.0606126	0.531701	1.51419	1.51419	217.672	143.755	0.0565959	0.28327	1.32509	1.32509	217.672	164.27
ENSG00000067248	DHX29	0.337229	0.995699	1.23412	1.23412	58.319	47.2557	0.508204	0.862134	1.25096	1.25096	58.319	46.6195	0.945227	0.984426	1.01556	1.01556	58.319	57.4254
ENSG00000153250	RBMS1	0.337382	0.995699	0.843226	-1.18592	207.753	246.379	0.151444	0.685306	0.674968	-1.48155	207.753	307.797	0.893712	0.970168	0.975579	-1.02503	207.753	212.954
ENSG00000120616	EPC1	0.337437	0.995699	0.870249	-1.1491	595.522	684.312	0.0706084	0.558359	0.667195	-1.49881	595.522	892.576	0.000800014	0.0248983	0.604776	-1.65351	595.522	984.699
ENSG00000078177	N4BP2	0.337455	0.995699	1.24968	1.24968	113.289	90.6547	0.380693	0.817243	1.37095	1.37095	113.289	82.6359	0.062786	0.297458	1.57012	1.57012	113.289	72.1533
ENSG00000134248	LAMTOR5	0.33753	0.995699	0.771456	-1.29625	69.3916	89.9489	0.340125	0.799014	0.671814	-1.48851	69.3916	103.29	0.604332	0.833319	1.15931	1.15931	69.3916	59.8559
ENSG00000266173	STRADA	0.337601	0.995699	0.722845	-1.38342	54.2353	75.0303	0.851001	0.963367	1.10379	1.10379	54.2353	49.1353	0.532152	0.7949	0.803007	-1.24532	54.2353	67.5402
ENSG00000225200	---	0.337618	0.995699	0.836332	-1.1957	115.797	138.458	0.0695192	0.554491	0.595011	-1.68064	115.797	194.613	0.293584	0.625371	1.23179	1.23179	115.797	94.0071
ENSG00000081307	UBA5	0.33778	0.995699	1.1676	1.1676	81.9258	70.1662	0.307445	0.778391	1.29117	1.29117	81.9258	63.451	0.0607764	0.292669	1.37265	1.37265	81.9258	59.6845
ENSG00000243708	PLA2G4B	0.338154	0.995699	0.672656	-1.48664	13.9431	20.7284	0.523589	0.868098	1.52026	1.52026	13.9431	9.17154	0.972429	0.992617	1.01512	1.01512	13.9431	13.7354
ENSG00000133422	MORC2	0.338303	0.995699	1.28349	1.28349	47.6655	37.1374	0.00844872	0.233094	3.03384	3.03384	47.6655	15.7113	0.021142	0.17102	1.88171	1.88171	47.6655	25.331
ENSG00000153561	RMND5A	0.338354	0.995699	0.754793	-1.32487	71.531	94.769	0.81861	0.957644	1.1103	1.1103	71.531	64.4248	0.4879	0.768843	0.809474	-1.23537	71.531	88.3673
ENSG00000112679	DUSP22	0.338454	0.995699	1.22177	1.22177	92.4758	75.6899	0.472575	0.847468	0.794567	-1.25855	92.4758	116.385	0.778608	0.918105	1.06264	1.06264	92.4758	87.0249
ENSG00000124172	ATP5F1E	0.338477	0.995699	0.842955	-1.1863	1004.28	1191.38	0.00161597	0.118188	0.418808	-2.38773	1004.28	2397.95	0.0337044	0.21863	0.674848	-1.48181	1004.28	1488.16
ENSG00000102931	ARL2BP	0.338662	0.995699	1.23368	1.23368	38.5444	31.2436	0.00951789	0.241243	0.430796	-2.32128	38.5444	89.4724	0.00152488	0.0370211	5.18742	5.18742	38.5444	7.43037
ENSG00000136026	CKAP4	0.338684	0.995699	0.770744	-1.29745	67.1938	87.1805	0.753672	0.940475	1.14195	1.14195	67.1938	58.8413	0.218832	0.547365	0.707294	-1.41384	67.1938	95.0012
ENSG00000196943	NOP9	0.338862	0.995699	0.8042	-1.24347	28.6906	35.6759	0.984278	0.995918	1.00699	1.00699	28.6906	28.4913	0.270309	0.599083	1.31534	1.31534	28.6906	21.8123
ENSG00000165416	SUGT1	0.339172	0.995699	0.835083	-1.19749	116.871	139.952	0.129004	0.655209	0.644115	-1.55252	116.871	181.445	0.200998	0.527701	0.779122	-1.2835	116.871	150.004
ENSG00000106952	TNFSF8	0.339995	0.995699	0.753731	-1.32673	36.7708	48.785	0.696867	0.931483	0.836698	-1.19517	36.7708	43.9475	0.0618105	0.294855	0.565629	-1.76794	36.7708	65.0086
ENSG00000118518	RNF146	0.340004	0.995699	1.35488	1.35488	43.4622	32.0783	0.141533	0.675458	2.08301	2.08301	43.4622	20.8651	0.0374364	0.232527	2.00922	2.00922	43.4622	21.6314
ENSG00000042429	MED17	0.340172	0.995699	0.865149	-1.15587	124.424	143.818	0.953875	0.986938	0.986505	-1.01368	124.424	126.126	0.440133	0.739972	0.885744	-1.12899	124.424	140.474
ENSG00000139437	TCHP	0.340257	0.995699	1.22426	1.22426	100.22	81.8615	0.220164	0.73603	1.49798	1.49798	100.22	66.9036	0.153955	0.466246	1.36901	1.36901	100.22	73.206
ENSG00000289472	---	0.340342	0.995699	0.734903	-1.36072	34.8169	47.3762	0.627186	0.909656	0.784886	-1.27407	34.8169	44.3592	0.0362506	0.22709	0.498246	-2.00704	34.8169	69.879
ENSG00000120992	LYPLA1	0.340356	0.995699	1.17277	1.17277	148.32	126.47	0.21674	0.733853	0.729199	-1.37137	148.32	203.402	0.477017	0.76638	0.884886	-1.13009	148.32	167.615
ENSG00000176623	RMDN1	0.340603	0.995699	1.24792	1.24792	58.7957	47.115	0.283102	0.760636	1.47335	1.47335	58.7957	39.9061	0.577029	0.819747	1.14282	1.14282	58.7957	51.448
ENSG00000164924	YWHAZ	0.340637	0.995699	0.870583	-1.14866	814.602	935.697	0.101284	0.624183	0.691758	-1.44559	814.602	1177.58	0.290397	0.62307	0.852515	-1.173	814.602	955.527
ENSG00000163738	MTHFD2L	0.34064	0.995699	1.2432	1.2432	37.9742	30.5455	0.842986	0.963204	0.93355	-1.07118	37.9742	40.6772	0.104706	0.386522	1.48235	1.48235	37.9742	25.6176
ENSG00000109390	NDUFC1	0.34078	0.995699	1.21831	1.21831	84.9315	69.7123	0.417617	0.831134	0.773677	-1.29253	84.9315	109.776	0.70705	0.883539	1.08384	1.08384	84.9315	78.3618
ENSG00000138758	SEPTIN11	0.340825	0.995699	1.2416	1.2416	111.743	89.9989	0.879636	0.96808	1.05446	1.05446	111.743	105.971	0.16728	0.482622	1.38624	1.38624	111.743	80.6085
ENSG00000144840	RABL3	0.34116	0.995699	1.27449	1.27449	32.8697	25.7905	0.296244	0.770833	1.5136	1.5136	32.8697	21.7163	0.23341	0.562061	1.36974	1.36974	32.8697	23.9971
ENSG00000119787	ATL2	0.341161	0.995699	1.24137	1.24137	42.1375	33.9443	0.122191	0.647563	1.73713	1.73713	42.1375	24.257	0.323164	0.652017	1.26053	1.26053	42.1375	33.4284
ENSG00000078902	TOLLIP	0.34117	0.995699	1.26735	1.26735	30.5586	24.1122	0.490126	0.855875	1.30371	1.30371	30.5586	23.4397	0.331482	0.659919	1.28354	1.28354	30.5586	23.8082
ENSG00000104756	KCTD9	0.341441	0.995699	1.23765	1.23765	45.0813	36.425	0.648228	0.914046	1.17028	1.17028	45.0813	38.5217	0.00344597	0.0596521	2.08893	2.08893	45.0813	21.581
ENSG00000011566	MAP4K3	0.341449	0.995699	0.75181	-1.33012	25.0073	33.2628	0.217802	0.733853	1.8074	1.8074	25.0073	13.8361	0.00866402	0.104093	2.77401	2.77401	25.0073	9.01486
ENSG00000177917	ARL6IP6	0.34165	0.995699	1.18695	1.18695	102.221	86.1212	0.404729	0.827997	1.26146	1.26146	102.221	81.0342	0.407021	0.722997	1.16698	1.16698	102.221	87.5945
ENSG00000237943	PRKCQ-AS1	0.341986	0.995699	0.851703	-1.17412	242.903	285.197	0.119456	0.645373	0.666625	-1.50009	242.903	364.378	0.231193	0.56036	0.810869	-1.23325	242.903	299.559
ENSG00000166012	TAF1D	0.34202	0.995699	1.15234	1.15234	290.999	252.53	0.484745	0.854501	0.851699	-1.17412	290.999	341.669	0.285149	0.615636	0.848281	-1.17885	290.999	343.046
ENSG00000121691	CAT	0.342118	0.995699	1.30736	1.30736	54.9944	42.0653	0.638663	0.911864	0.816573	-1.22463	54.9944	67.3477	0.689151	0.875796	1.1236	1.1236	54.9944	48.9447
ENSG00000131127	ZNF141	0.342296	0.995699	1.25093	1.25093	73.2231	58.5349	0.0828392	0.591795	1.89764	1.89764	73.2231	38.5864	0.0353273	0.22346	1.6807	1.6807	73.2231	43.567
ENSG00000144118	RALB	0.342456	0.995699	0.79576	-1.25666	34.9528	43.9238	0.0485786	0.488163	0.487007	-2.05336	34.9528	71.7706	0.268074	0.597752	0.7585	-1.31839	34.9528	46.0815
ENSG00000042753	AP2S1	0.3425	0.995699	0.789583	-1.26649	16.9271	21.438	0.0569374	0.5173	0.493933	-2.02456	16.9271	34.27	0.052899	0.272938	0.613045	-1.6312	16.9271	27.6114
ENSG00000198160	MIER1	0.342889	0.995699	1.19727	1.19727	253.672	211.875	0.970526	0.991234	1.01089	1.01089	253.672	250.94	0.0299105	0.205648	1.53815	1.53815	253.672	164.92
ENSG00000214753	HNRNPUL2	0.34316	0.995699	0.873507	-1.14481	167.663	191.942	0.178446	0.705032	0.744511	-1.34316	167.663	225.198	8.04635e-06	0.00174367	0.520233	-1.92222	167.663	322.284
ENSG00000101079	NDRG3	0.343491	0.995699	0.764406	-1.30821	69.501	90.9216	0.733923	0.936216	0.861469	-1.16081	69.501	80.6773	0.468609	0.759835	0.808017	-1.2376	69.501	86.0143
ENSG00000163528	CHCHD4	0.343964	0.995699	0.797647	-1.25369	19.4965	24.4425	0.25157	0.749787	1.559	1.559	19.4965	12.5057	0.336026	0.665343	0.789075	-1.26731	19.4965	24.708
ENSG00000115756	HPCAL1	0.344066	0.995699	0.814418	-1.22787	141.218	173.398	0.132246	0.659276	0.604566	-1.65408	141.218	233.586	0.00179353	0.0404367	0.496911	-2.01243	141.218	284.192
ENSG00000122483	CCDC18	0.344132	0.995699	1.2663	1.2663	72.7657	57.4631	0.489649	0.855875	1.30556	1.30556	72.7657	55.7351	0.12738	0.425642	1.48666	1.48666	72.7657	48.9457
ENSG00000205531	NAP1L4	0.344141	0.995699	1.14432	1.14432	392.296	342.82	0.640256	0.913183	1.10844	1.10844	392.296	353.916	0.907929	0.973961	1.0172	1.0172	392.296	385.662
ENSG00000154743	TSEN2	0.344363	0.995699	0.72245	-1.38418	22.1319	30.6346	0.792855	0.951199	0.869642	-1.1499	22.1319	25.4495	0.685173	0.875355	0.864926	-1.15617	22.1319	25.5883
ENSG00000109684	CLNK	0.344415	0.995699	1.29773	1.29773	53.1179	40.9314	0.0879265	0.599638	2.09474	2.09474	53.1179	25.3577	0.905642	0.973459	1.03422	1.03422	53.1179	51.3601
ENSG00000132466	ANKRD17	0.344657	0.995699	1.29645	1.29645	305.658	235.765	0.269761	0.759565	1.60004	1.60004	305.658	191.031	0.374815	0.6951	1.2878	1.2878	305.658	237.349
ENSG00000152219	ARL14EP	0.344676	0.995699	1.19815	1.19815	98.4766	82.1906	0.906082	0.974889	1.03532	1.03532	98.4766	95.1173	0.00224229	0.0468559	1.88267	1.88267	98.4766	52.3069
ENSG00000266967	AARSD1	0.344914	0.995699	0.727758	-1.37408	39.4002	54.1392	0.845304	0.963204	1.10747	1.10747	39.4002	35.5768	0.773074	0.914726	0.904035	-1.10615	39.4002	43.5826
ENSG00000153037	SRP19	0.344935	0.995699	0.794941	-1.25796	126.498	159.129	0.533125	0.875429	0.791316	-1.26372	126.498	159.858	0.74173	0.900317	0.92014	-1.08679	126.498	137.477
ENSG00000167658	EEF2	0.344956	0.995699	0.87473	-1.14321	1991.45	2276.64	0.117047	0.643272	0.709055	-1.41033	1991.45	2808.6	0.0411449	0.243195	0.74062	-1.35022	1991.45	2688.89
ENSG00000163812	ZDHHC3	0.345069	0.995699	0.834577	-1.19821	44.8039	53.6846	0.268386	0.759565	0.723655	-1.38187	44.8039	61.9134	0.00422332	0.0667855	0.572694	-1.74613	44.8039	78.2336
ENSG00000232858	RPL34P27	0.345153	0.995699	0.768044	-1.30201	72.8813	94.8921	0.216184	0.733853	0.587156	-1.70313	72.8813	124.126	0.310372	0.641736	0.745243	-1.34184	72.8813	97.7954
ENSG00000136875	PRPF4	0.345176	0.995699	0.705341	-1.41775	63.1893	89.5869	0.242398	0.746358	1.96797	1.96797	63.1893	32.1088	0.0907434	0.360262	1.94402	1.94402	63.1893	32.5045
ENSG00000173542	MOB1B	0.345433	0.995699	1.28797	1.28797	44.2976	34.3932	0.447991	0.836693	1.37021	1.37021	44.2976	32.3291	0.00685041	0.0890705	2.21813	2.21813	44.2976	19.9707
ENSG00000103642	LACTB	0.345908	0.995699	1.20597	1.20597	45.0412	37.3484	0.258679	0.753421	1.41817	1.41817	45.0412	31.7601	0.0321144	0.212976	1.5702	1.5702	45.0412	28.6849
ENSG00000164307	ERAP1	0.346441	0.995699	0.82529	-1.2117	86.7778	105.148	0.919441	0.980612	0.968579	-1.03244	86.7778	89.593	0.177379	0.494448	1.33924	1.33924	86.7778	64.7964
ENSG00000120314	WDR55	0.346492	0.995699	0.85051	-1.17576	42.4693	49.9339	0.925577	0.982117	1.02524	1.02524	42.4693	41.4239	0.325504	0.654741	1.19873	1.19873	42.4693	35.4284
ENSG00000120071	KANSL1	0.346806	0.995699	0.823544	-1.21426	341.109	414.196	0.605731	0.901684	1.17961	1.17961	341.109	289.172	0.258878	0.587319	1.27473	1.27473	341.109	267.593
ENSG00000197948	FCHSD1	0.346875	0.995699	0.812336	-1.23102	41.6846	51.3144	0.458871	0.841891	1.29293	1.29293	41.6846	32.2403	0.608223	0.834505	1.12633	1.12633	41.6846	37.009
ENSG00000107862	GBF1	0.34713	0.995699	0.763986	-1.30892	90.3337	118.24	0.278359	0.760636	1.6237	1.6237	90.3337	55.6345	0.751002	0.904697	1.09923	1.09923	90.3337	82.179
ENSG00000143947	RPS27A	0.347268	0.995699	0.773536	-1.29276	11985.2	15494.1	0.0351648	0.418451	0.41004	-2.43878	11985.2	29229.4	0.0221373	0.172474	0.522607	-1.91348	11985.2	22933.5
ENSG00000241837	ATP5PO	0.347544	0.995699	0.744732	-1.34276	174.717	234.604	0.112067	0.636173	0.462824	-2.16065	174.717	377.503	0.224158	0.552464	0.6732	-1.48544	174.717	259.532
ENSG00000230562	FAM133DP	0.347935	0.995699	0.776449	-1.28791	120.086	154.661	0.660822	0.919169	1.20163	1.20163	120.086	99.9361	0.986944	0.996983	0.995425	-1.0046	120.086	120.638
ENSG00000139726	DENR	0.348027	0.995699	0.811346	-1.23252	152.445	187.891	0.235591	0.745985	0.665163	-1.50339	152.445	229.184	0.190278	0.513286	0.739117	-1.35297	152.445	206.253
ENSG00000204217	BMPR2	0.348075	0.995699	1.18667	1.18667	87.4967	73.7327	0.214461	0.733853	1.42176	1.42176	87.4967	61.5412	0.0517735	0.270229	1.44872	1.44872	87.4967	60.396
ENSG00000115561	CHMP3	0.348108	0.995699	1.12612	1.12612	172.046	152.778	0.140038	0.672158	0.752335	-1.32919	172.046	228.683	0.0588888	0.28854	0.783163	-1.27687	172.046	219.681
ENSG00000111863	ADTRP	0.348139	0.995699	1.27648	1.27648	65.5058	51.3177	0.891907	0.970225	0.947179	-1.05577	65.5058	69.1589	0.83319	0.944603	1.0581	1.0581	65.5058	61.909
ENSG00000139990	DCAF5	0.34835	0.995699	0.874323	-1.14374	148.08	169.365	0.950654	0.986219	0.986388	-1.0138	148.08	150.124	0.304491	0.636959	1.16683	1.16683	148.08	126.908
ENSG00000090863	GLG1	0.348516	0.995699	0.878362	-1.13848	408.878	465.501	0.555959	0.88237	0.881659	-1.13423	408.878	463.76	0.347528	0.675767	0.873946	-1.14423	408.878	467.852
ENSG00000133612	AGAP3	0.34852	0.995699	0.722341	-1.38439	23.2371	32.1692	0.836223	0.960862	0.894891	-1.11745	23.2371	25.9664	0.735329	0.897721	1.1323	1.1323	23.2371	20.5221
ENSG00000108389	MTMR4	0.348605	0.995699	0.814376	-1.22793	51.5288	63.2739	0.208261	0.729879	1.54571	1.54571	51.5288	33.3366	0.396839	0.713994	0.825258	-1.21174	51.5288	62.4396
ENSG00000153029	MR1	0.34861	0.995699	0.840374	-1.18995	39.6628	47.1966	0.378805	0.817243	1.294	1.294	39.6628	30.6513	0.75266	0.905081	0.941174	-1.0625	39.6628	42.1419
ENSG00000260927	---	0.348764	0.995699	0.840069	-1.19038	61.3396	73.0173	0.993026	0.998899	1.00252	1.00252	61.3396	61.1853	0.936109	0.982101	0.984595	-1.01565	61.3396	62.2993
ENSG00000181035	SLC25A42	0.349082	0.995699	0.755199	-1.32415	46.6516	61.774	0.589697	0.897036	1.28701	1.28701	46.6516	36.2482	0.429366	0.734732	0.782285	-1.27831	46.6516	59.6351
ENSG00000130349	MTRES1	0.349121	0.995699	0.787287	-1.27019	38.7707	49.246	0.43065	0.832061	1.37198	1.37198	38.7707	28.259	0.775896	0.91694	0.927237	-1.07847	38.7707	41.8131
ENSG00000137876	RSL24D1	0.34921	0.995699	0.818005	-1.22249	163.781	200.22	0.0367572	0.426159	0.501507	-1.99399	163.781	326.578	0.0927064	0.364166	0.688193	-1.45308	163.781	237.988
ENSG00000240535	---	0.349695	0.995699	0.701105	-1.42632	19.9881	28.5094	0.697864	0.931483	1.25976	1.25976	19.9881	15.8665	0.785246	0.921223	1.11503	1.11503	19.9881	17.9261
ENSG00000034713	GABARAPL2	0.34976	0.995699	0.780564	-1.28113	142.219	182.201	0.232225	0.743971	0.61339	-1.63029	142.219	231.858	0.214346	0.545252	0.711027	-1.40642	142.219	200.02
ENSG00000138468	SENP7	0.350499	0.995699	1.12929	1.12929	352.572	312.207	0.0224933	0.347252	1.58805	1.58805	352.572	222.015	0.00330813	0.0583007	1.49032	1.49032	352.572	236.575
ENSG00000089902	RCOR1	0.350579	0.995699	1.24083	1.24083	88.3605	71.2109	0.128472	0.654399	1.72984	1.72984	88.3605	51.0803	0.129849	0.428752	1.43882	1.43882	88.3605	61.4119
ENSG00000134152	KATNBL1	0.350967	0.995699	1.23936	1.23936	44.742	36.101	0.779512	0.945465	1.10387	1.10387	44.742	40.5318	0.0857435	0.352745	1.51768	1.51768	44.742	29.4805
ENSG00000175727	MLXIP	0.351013	0.995699	0.826452	-1.20999	70.9242	85.8176	0.966474	0.989469	1.0134	1.0134	70.9242	69.9863	0.209998	0.539139	0.767622	-1.30272	70.9242	92.3947
ENSG00000125484	GTF3C4	0.351362	0.995699	1.20282	1.20282	53.0559	44.1094	0.0327957	0.410895	1.95956	1.95956	53.0559	27.0754	0.212772	0.5434	1.29112	1.29112	53.0559	41.0928
ENSG00000275097	---	0.351427	0.995699	0.720887	-1.38718	40.2715	55.8639	0.429446	0.832061	0.651904	-1.53397	40.2715	61.7752	0.288664	0.620262	0.679834	-1.47095	40.2715	59.2373
ENSG00000171827	ZNF570	0.351688	0.995699	1.26638	1.26638	31.2015	24.6384	0.053585	0.504156	2.19231	2.19231	31.2015	14.2323	0.0303299	0.20683	1.78926	1.78926	31.2015	17.4382
ENSG00000010017	RANBP9	0.351814	0.995699	1.25303	1.25303	42.86	34.2049	0.39089	0.823695	1.38003	1.38003	42.86	31.0572	0.56889	0.815209	1.15246	1.15246	42.86	37.19
ENSG00000133773	CCDC59	0.352166	0.995699	0.804793	-1.24256	107.352	133.391	0.0487245	0.488163	0.492992	-2.02843	107.352	217.757	0.135452	0.436174	0.69706	-1.4346	107.352	154.007
ENSG00000112592	TBP	0.352317	0.995699	0.818447	-1.22183	52.1728	63.7461	0.174663	0.704898	1.58838	1.58838	52.1728	32.8465	0.432855	0.735617	0.839563	-1.1911	52.1728	62.1428
ENSG00000133731	IMPA1	0.352321	0.995699	0.761482	-1.31323	52.9457	69.5298	0.643402	0.914046	0.810965	-1.2331	52.9457	65.2873	0.328268	0.655528	0.743376	-1.34521	52.9457	71.2234
ENSG00000112167	SAYSD1	0.352612	0.995699	1.26928	1.26928	43.6512	34.3904	0.660327	0.919169	1.18953	1.18953	43.6512	36.696	0.788578	0.922091	1.07316	1.07316	43.6512	40.6755
ENSG00000177144	NUDT4B	0.352965	0.995699	1.28883	1.28883	20.1087	15.6022	0.489118	0.85561	0.754536	-1.32532	20.1087	26.6504	0.628037	0.846077	0.875445	-1.14228	20.1087	22.9697
ENSG00000272886	DCP1A	0.353104	0.995699	1.30384	1.30384	81.2207	62.2933	0.145185	0.679713	1.91356	1.91356	81.2207	42.4448	0.407034	0.722997	1.27792	1.27792	81.2207	63.5571
ENSG00000150977	RILPL2	0.353217	0.995699	0.815054	-1.22691	52.9912	65.0155	0.829104	0.960175	0.929137	-1.07627	52.9912	57.0327	0.603239	0.833319	0.888021	-1.1261	52.9912	59.6733
ENSG00000009844	VTA1	0.353541	0.995699	0.832365	-1.2014	65.326	78.4823	0.522428	0.868024	0.823076	-1.21496	65.326	79.3681	0.0439745	0.248858	0.664085	-1.50583	65.326	98.3699
ENSG00000261098	---	0.353649	0.995699	0.703901	-1.42065	45.3456	64.4203	0.167965	0.701471	2.27892	2.27892	45.3456	19.8978	0.538381	0.79672	1.27591	1.27591	45.3456	35.5399
ENSG00000062194	GPBP1	0.353803	0.995699	1.13731	1.13731	386.365	339.718	0.846357	0.96329	1.04241	1.04241	386.365	370.647	0.364169	0.688447	1.13946	1.13946	386.365	339.077
ENSG00000229474	PATL2	0.353883	0.995699	1.24825	1.24825	50.8211	40.714	0.20868	0.729879	1.59848	1.59848	50.8211	31.7934	0.218387	0.547365	1.35687	1.35687	50.8211	37.4547
ENSG00000026950	BTN3A1	0.354273	0.995699	1.18255	1.18255	146.456	123.848	0.0406235	0.448468	1.78428	1.78428	146.456	82.0816	0.0219334	0.172474	1.54148	1.54148	146.456	95.01
ENSG00000123374	CDK2	0.354289	0.995699	1.22798	1.22798	46.2955	37.7005	0.466678	0.847188	1.28323	1.28323	46.2955	36.0774	0.0987514	0.377397	1.46754	1.46754	46.2955	31.5464
ENSG00000081791	DELE1	0.354518	0.995699	1.21076	1.21076	68.2758	56.391	0.663796	0.920406	0.871886	-1.14694	68.2758	78.3082	0.477625	0.76638	0.860748	-1.16178	68.2758	79.3215
ENSG00000137073	UBAP2	0.354727	0.995699	0.814144	-1.22828	118.957	146.113	0.687936	0.927604	1.14862	1.14862	118.957	103.565	0.282878	0.612746	1.28416	1.28416	118.957	92.6344
ENSG00000120727	PAIP2	0.354743	0.995699	1.21739	1.21739	126.455	103.874	0.0784394	0.577294	0.564236	-1.77231	126.455	224.118	0.603548	0.833319	0.892346	-1.12064	126.455	141.711
ENSG00000057663	ATG5	0.355146	0.995699	1.30225	1.30225	41.9048	32.1788	0.821343	0.958436	1.10416	1.10416	41.9048	37.9517	0.777118	0.917272	1.08665	1.08665	41.9048	38.5632
ENSG00000136813	ECPAS	0.35526	0.995699	0.859637	-1.16328	103.68	120.609	0.406905	0.829068	1.23562	1.23562	103.68	83.9091	0.411039	0.725705	0.870166	-1.14921	103.68	119.149
ENSG00000257337	---	0.355326	0.995699	0.719871	-1.38914	49.1058	68.2147	0.166964	0.700792	2.17045	2.17045	49.1058	22.6247	0.44419	0.742771	1.32972	1.32972	49.1058	36.9293
ENSG00000174606	ANGEL2	0.35571	0.995699	1.17186	1.17186	75.0726	64.0629	0.617043	0.904701	1.14131	1.14131	75.0726	65.7775	0.0996831	0.378977	1.34368	1.34368	75.0726	55.8708
ENSG00000196199	MPHOSPH8	0.355853	0.995699	0.85631	-1.1678	685.838	800.922	0.497845	0.858261	1.19311	1.19311	685.838	574.833	0.840938	0.947396	0.965603	-1.03562	685.838	710.269
ENSG00000105576	TNPO2	0.355984	0.995699	1.26273	1.26273	64.4273	51.0224	0.133967	0.661054	1.8076	1.8076	64.4273	35.6425	0.351625	0.679668	1.27568	1.27568	64.4273	50.5044
ENSG00000005339	CREBBP	0.356216	0.995699	1.13814	1.13814	227.467	199.859	0.420145	0.831134	1.19105	1.19105	227.467	190.98	0.397422	0.714164	1.1307	1.1307	227.467	201.174
ENSG00000178980	SELENOW	0.356582	0.995699	1.19072	1.19072	108.89	91.4488	0.017478	0.317589	0.504664	-1.98152	108.89	215.767	0.766724	0.911708	1.06013	1.06013	108.89	102.713
ENSG00000218739	CEBPZOS	0.356662	0.995699	0.825408	-1.21152	95.6705	115.907	0.593443	0.897879	1.18867	1.18867	95.6705	80.4856	0.481268	0.768189	0.859097	-1.16401	95.6705	111.362
ENSG00000206418	RAB12	0.357232	0.995699	1.21589	1.21589	79.8461	65.6687	0.133179	0.659276	1.64471	1.64471	79.8461	48.5472	0.546677	0.802394	1.14116	1.14116	79.8461	69.9694
ENSG00000010244	ZNF207	0.35753	0.995699	0.821827	-1.2168	742.508	903.485	0.185881	0.710292	1.54912	1.54912	742.508	479.309	0.464036	0.756102	1.17614	1.17614	742.508	631.31
ENSG00000117155	SSX2IP	0.357553	0.995699	1.3346	1.3346	21.6889	16.2513	0.0412624	0.452348	2.85248	2.85248	21.6889	7.60353	0.00636533	0.0844525	2.58581	2.58581	21.6889	8.38767
ENSG00000064995	TAF11	0.358024	0.995699	0.855847	-1.16843	118.605	138.582	0.842204	0.963204	0.949217	-1.0535	118.605	124.95	0.190804	0.51423	1.26362	1.26362	118.605	93.8617
ENSG00000106723	SPIN1	0.358287	0.995699	1.20139	1.20139	81.3497	67.7129	0.533991	0.875913	1.21142	1.21142	81.3497	67.1524	0.46868	0.759835	1.16122	1.16122	81.3497	70.0554
ENSG00000005156	LIG3	0.358365	0.995699	1.34856	1.34856	140.06	103.859	0.481426	0.853672	1.42615	1.42615	140.06	98.2087	0.469032	0.760196	1.27679	1.27679	140.06	109.697
ENSG00000186432	KPNA4	0.358417	0.995699	1.18499	1.18499	269.856	227.728	0.63702	0.911031	1.14438	1.14438	269.856	235.811	0.43651	0.738369	1.16074	1.16074	269.856	232.487
ENSG00000188186	LAMTOR4	0.358756	0.995699	0.805288	-1.24179	80.0156	99.3626	0.00243456	0.136967	0.335051	-2.98462	80.0156	238.816	0.150646	0.461054	0.70322	-1.42203	80.0156	113.785
ENSG00000166913	YWHAB	0.359203	0.995699	1.12636	1.12636	1969.26	1748.33	0.563905	0.887176	1.12296	1.12296	1969.26	1753.63	0.651838	0.85972	0.941074	-1.06262	1969.26	2092.56
ENSG00000141510	TP53	0.35929	0.995699	1.20689	1.20689	37.4669	31.0443	0.324938	0.79156	0.738985	-1.35321	37.4669	50.7005	0.687005	0.875355	0.919524	-1.08752	37.4669	40.746
ENSG00000153560	UBP1	0.359376	0.995699	0.79779	-1.25346	145.883	182.859	0.434512	0.833814	0.742553	-1.34671	145.883	196.461	0.465869	0.757167	0.82985	-1.20504	145.883	175.794
ENSG00000072062	PRKACA	0.359429	0.995699	0.756649	-1.32162	29.3773	38.8255	0.144785	0.679713	0.507878	-1.96898	29.3773	57.8432	0.0579518	0.285658	0.552722	-1.80923	29.3773	53.1502
ENSG00000135749	PCNX2	0.359618	0.995699	1.24986	1.24986	62.527	50.0273	0.237666	0.745985	1.56416	1.56416	62.527	39.9747	0.932558	0.980261	0.979049	-1.0214	62.527	63.8651
ENSG00000101639	CEP192	0.35963	0.995699	1.18312	1.18312	113.982	96.3399	0.0644794	0.539914	1.69957	1.69957	113.982	67.0653	0.48184	0.768189	1.14269	1.14269	113.982	99.7493
ENSG00000172046	USP19	0.359665	0.995699	0.783556	-1.27623	25.3129	32.3051	0.685078	0.927534	1.1843	1.1843	25.3129	21.3737	0.302253	0.634917	0.753446	-1.32723	25.3129	33.5961
ENSG00000204842	ATXN2	0.359771	0.995699	0.854615	-1.17012	228.775	267.694	0.361136	0.807282	1.27565	1.27565	228.775	179.339	0.91388	0.976285	0.980925	-1.01945	228.775	233.224
ENSG00000066135	KDM4A	0.359786	0.995699	1.22495	1.22495	60.5209	49.4069	0.948711	0.985285	0.978406	-1.02207	60.5209	61.8567	0.23736	0.566392	0.765702	-1.30599	60.5209	79.0398
ENSG00000111832	RWDD1	0.359988	0.995699	1.19017	1.19017	133.562	112.221	0.108826	0.636173	0.627329	-1.59406	133.562	212.906	0.929523	0.979758	0.982764	-1.01754	133.562	135.905
ENSG00000196873	CBWD3	0.359993	0.995699	1.37718	1.37718	79.3258	57.6003	0.492705	0.85646	1.44974	1.44974	79.3258	54.7172	0.14523	0.452953	1.69965	1.69965	79.3258	46.6718
ENSG00000174353	STAG3L3	0.360197	0.995699	1.6534	1.6534	287.73	174.023	0.0608914	0.53255	4.95781	4.95781	287.73	58.0357	0.0271697	0.194581	3.53735	3.53735	287.73	81.3407
ENSG00000114383	TUSC2	0.360206	0.995699	0.749647	-1.33396	66.0295	88.0807	0.905163	0.974889	0.94353	-1.05985	66.0295	69.9813	0.412212	0.726462	0.765134	-1.30696	66.0295	86.2979
ENSG00000103429	BFAR	0.360245	0.995699	0.814006	-1.22849	59.6069	73.2267	0.373306	0.816463	1.3684	1.3684	59.6069	43.5596	0.288162	0.619904	0.781168	-1.28014	59.6069	76.3049
ENSG00000153914	SREK1	0.360363	0.995699	0.841536	-1.1883	491.235	583.736	0.451661	0.837082	1.24629	1.24629	491.235	394.156	0.617387	0.840092	0.906843	-1.10273	491.235	541.698
ENSG00000101082	SLA2	0.360608	0.995699	1.26662	1.26662	22.4579	17.7306	0.937368	0.982844	0.969738	-1.03121	22.4579	23.1588	0.91605	0.976701	1.02805	1.02805	22.4579	21.8451
ENSG00000117906	RCN2	0.360666	0.995699	1.23146	1.23146	177.299	143.974	0.281539	0.760636	1.46274	1.46274	177.299	121.21	0.288028	0.619904	1.28525	1.28525	177.299	137.949
ENSG00000167797	CDK2AP2	0.360691	0.995699	1.21681	1.21681	45.5029	37.3953	0.393428	0.823917	0.758203	-1.31891	45.5029	60.0141	0.0216569	0.172078	0.608585	-1.64316	45.5029	74.7683
ENSG00000204397	CARD16	0.360709	0.995699	0.765499	-1.30634	55.7511	72.8298	0.423962	0.831134	0.697407	-1.43388	55.7511	79.9406	0.0901086	0.358901	0.5995	-1.66806	55.7511	92.996
ENSG00000109332	UBE2D3	0.360805	0.995699	0.838298	-1.19289	634.217	756.553	0.153969	0.689222	0.653322	-1.53064	634.217	970.757	0.040198	0.240858	0.663214	-1.50781	634.217	956.277
ENSG00000164338	UTP15	0.36106	0.995699	1.20835	1.20835	90.835	75.1729	0.959602	0.988539	1.01627	1.01627	90.835	89.3809	0.836664	0.945184	0.957022	-1.04491	90.835	94.9143
ENSG00000136717	BIN1	0.361127	0.995699	0.795235	-1.25749	46.2093	58.1077	0.186156	0.710292	0.601756	-1.6618	46.2093	76.7907	0.220913	0.549758	0.728029	-1.37357	46.2093	63.4718
[truncated: 3,855 more rows]

## Sheet: With GI Comparisions
Feature ID	Gene name	P-value (ASD,Yes vs TD,No)	FDR step up (ASD,Yes vs TD,No)	Ratio (ASD,Yes vs TD,No)	Fold change (ASD,Yes vs TD,No)	LSMean(ASD,Yes) (ASD,Yes vs TD,No)	LSMean(TD,No) (ASD,Yes vs TD,No)	P-value (ASD,No vs TD,No)	FDR step up (ASD,No vs TD,No)	Ratio (ASD,No vs TD,No)	Fold change (ASD,No vs TD,No)	LSMean(ASD,No) (ASD,No vs TD,No)	LSMean(TD,No) (ASD,No vs TD,No)	P-value (ASD,No vs ASD,Yes)	FDR step up (ASD,No vs ASD,Yes)	Ratio (ASD,No vs ASD,Yes)	Fold change (ASD,No vs ASD,Yes)	LSMean(ASD,No) (ASD,No vs ASD,Yes)	LSMean(ASD,Yes) (ASD,No vs ASD,Yes)
ENSG00000176978	DPP7	0.00668	0.335068	0.58	-1.72	101.55	174.97	2.91e-06	0.017	0.389	-2.57	68	175	0.0502	0.543	0.67	-1.49	68	102
ENSG00000099622	CIRBP	0.474	0.897503	0.866	-1.16	832.18	961.44	2.26e-05	0.0331	0.425	-2.35	409	961	0.000434	0.163	0.491	-2.04	409	832
ENSG00000101752	MIB1	0.0255	0.47495	1.43	1.43	185.81	129.67	2.21e-05	0.0331	1.97	1.97	256	130	0.046	0.537	1.38	1.38	256	186
ENSG00000198888	MT-ND1	3.98e-09	2.33017e-05	0.221	-4.53	2798.8	12671.6	1.66e-05	0.0331	0.331	-3.02	4200	12700	0.114	0.625	1.5	1.5	4200	2800
ENSG00000102317	RBM3	0.233	0.797138	0.731	-1.37	696.93	953.94	3.52e-05	0.0344	0.336	-2.98	320	954	0.00324	0.354	0.46	-2.18	320	697
ENSG00000007255	TRAPPC6A	4.04e-06	0.00472549	0.468	-2.14	83.44	178.23	3e-05	0.0344	0.505	-1.98	90.1	178	0.649	0.908	1.08	1.08	90.1	83.4
ENSG00000196950	SLC39A10	0.0662	0.591587	1.53	1.53	184.4	120.88	4.88e-05	0.0408	2.53	2.53	306	121	0.0265	0.509	1.66	1.66	306	184
ENSG00000061273	HDAC7	0.00352	0.276737	0.48	-2.08	376.45	783.52	0.000187	0.137	0.391	-2.56	306	784	0.414	0.819	0.814	-1.23	306	376
ENSG00000101193	GID8	0.898	0.983934	1.02	1.02	201.64	196.95	0.000463	0.301	0.523	-1.91	103	197	0.000299	0.163	0.511	-1.96	103	202
ENSG00000141699	RETREG3	0.000722	0.130448	0.44	-2.27	137.92	313.5	0.000736	0.431	0.441	-2.27	138	313	0.992	0.998	1	1	138	138
ENSG00000198727	MT-CYB	2.2e-07	0.000429961	0.252	-3.96	4508.57	17855.9	0.00086	0.457	0.413	-2.42	7370	17900	0.0645	0.585	1.63	1.63	7370	4510
ENSG00000260563	---	0.928	0.988254	0.975	-1.03	117.67	120.74	0.00136	0.496	0.398	-2.51	48	121	0.0019	0.271	0.408	-2.45	48	118
ENSG00000136824	SMC2	0.847	0.975964	1.04	1.04	60.42	57.94	0.00124	0.496	1.99	1.99	116	57.9	0.0026	0.338	1.91	1.91	116	60.4
ENSG00000166750	SLFN5	0.374	0.870218	1.15	1.15	908.81	790.15	0.00127	0.496	1.66	1.66	1310	790	0.0198	0.486	1.44	1.44	1310	909
ENSG00000164896	FASTK	0.143	0.730301	0.69	-1.45	39.78	57.64	0.00134	0.496	0.439	-2.28	25.3	57.6	0.0829	0.598	0.636	-1.57	25.3	39.8
ENSG00000171204	TMEM126B	2.44e-05	0.0203683	2.42	2.42	57.18	23.61	0.00107	0.496	1.99	1.99	46.9	23.6	0.335	0.777	0.821	-1.22	46.9	57.2
ENSG00000189180	ZNF33A	0.935	0.988254	1.01	1.01	148.78	146.91	0.00183	0.508	1.61	1.61	237	147	0.00258	0.338	1.59	1.59	237	149
ENSG00000196544	BORCS6	0.826	0.975118	0.949	-1.05	72.64	76.52	0.00176	0.508	0.472	-2.12	36.1	76.5	0.00383	0.354	0.497	-2.01	36.1	72.6
ENSG00000110047	EHD1	0.848	0.976101	0.967	-1.03	375.51	388.39	0.00174	0.508	0.575	-1.74	223	388	0.00335	0.354	0.594	-1.68	223	376
ENSG00000044574	HSPA5	0.71	0.955769	0.908	-1.1	622.81	685.91	0.00181	0.508	0.445	-2.25	305	686	0.00604	0.379	0.49	-2.04	305	623
ENSG00000121749	TBC1D15	0.185	0.772251	1.3	1.3	263.77	202.14	0.00191	0.508	1.86	1.86	376	202	0.0761	0.587	1.43	1.43	376	264
ENSG00000100519	PSMC6	0.105	0.676178	0.77	-1.3	272	353.16	0.00166	0.508	0.602	-1.66	213	353	0.13	0.646	0.782	-1.28	213	272
ENSG00000081237	PTPRC	0.346	0.857726	1.16	1.16	2338.63	2015.77	0.00216	0.513	1.62	1.62	3270	2020	0.0337	0.516	1.4	1.4	3270	2340
ENSG00000100815	TRIP11	0.236	0.797886	1.41	1.41	156.91	110.94	0.00212	0.513	2.45	2.45	272	111	0.0596	0.575	1.73	1.73	272	157
ENSG00000062650	WAPL	0.144	0.730654	1.3	1.3	173.4	132.88	0.00219	0.513	1.74	1.74	232	133	0.111	0.623	1.34	1.34	232	173
ENSG00000198899	MT-ATP6	5.17e-05	0.0270256	0.343	-2.91	10877.8	31698.4	0.00235	0.522	0.448	-2.23	14200	31700	0.314	0.766	1.3	1.3	14200	10900
ENSG00000130522	JUND	0.0384	0.520917	0.618	-1.62	518.18	839	0.00241	0.522	0.493	-2.03	414	839	0.335	0.777	0.799	-1.25	414	518
ENSG00000145050	MANF	0.838	0.975402	1.05	1.05	62.28	59.19	0.00264	0.526	0.464	-2.16	27.4	59.2	0.00142	0.264	0.441	-2.27	27.4	62.3
ENSG00000275183	LENG9	0.0622	0.581875	0.564	-1.77	113.26	200.8	0.00278	0.526	0.398	-2.51	80	201	0.261	0.749	0.706	-1.42	80	113
ENSG00000244363	RPL7P23	0.055	0.577523	0.467	-2.14	25.5	54.56	0.00271	0.526	0.302	-3.31	16.5	54.6	0.281	0.756	0.646	-1.55	16.5	25.5
ENSG00000274265	---	0.000246	0.0653649	0.366	-2.73	227.33	620.46	0.00266	0.526	0.44	-2.27	273	620	0.506	0.865	1.2	1.2	273	227
ENSG00000161800	RACGAP1	0.0475	0.557175	0.395	-2.53	14.06	35.6	0.00295	0.54	0.244	-4.1	8.69	35.6	0.32	0.77	0.618	-1.62	8.69	14.1
ENSG00000115760	BIRC6	0.124	0.710065	1.31	1.31	233.61	178.7	0.00323	0.572	1.67	1.67	298	179	0.162	0.668	1.28	1.28	298	234
ENSG00000253304	TMEM200B	0.697	0.953384	1.09	1.09	729.69	670.32	0.00543	0.618	0.545	-1.83	365	670	0.00154	0.264	0.501	-2	365	730
ENSG00000150347	ARID5B	0.892	0.983462	0.98	-1.02	220.62	225.24	0.00675	0.618	1.51	1.51	340	225	0.00464	0.367	1.54	1.54	340	221
ENSG00000058262	SEC61A1	0.663	0.944099	0.886	-1.13	75.57	85.3	0.00445	0.618	0.449	-2.22	38.3	85.3	0.0164	0.477	0.507	-1.97	38.3	75.6
ENSG00000168066	SF1	0.572	0.920255	0.909	-1.1	920.27	1012.77	0.00493	0.618	0.621	-1.61	629	1010	0.0248	0.494	0.683	-1.46	629	920
ENSG00000128272	ATF4	0.587	0.92621	0.878	-1.14	257.12	292.81	0.00597	0.618	0.517	-1.93	151	293	0.0276	0.511	0.589	-1.7	151	257
ENSG00000172354	GNB2	0.603	0.929961	0.878	-1.14	80.01	91.13	0.00633	0.618	0.502	-1.99	45.7	91.1	0.0277	0.511	0.571	-1.75	45.7	80
ENSG00000124782	RREB1	0.544	0.916831	1.17	1.17	38.59	32.91	0.00578	0.618	2.04	2.04	67.1	32.9	0.0328	0.516	1.74	1.74	67.1	38.6
ENSG00000261002	VPS39-DT	0.44	0.889724	0.781	-1.28	56.75	72.69	0.00488	0.618	0.401	-2.49	29.2	72.7	0.0415	0.529	0.514	-1.94	29.2	56.7
ENSG00000227304	---	0.458	0.89231	0.801	-1.25	27.67	34.53	0.00528	0.618	0.427	-2.34	14.7	34.5	0.0417	0.529	0.533	-1.88	14.7	27.7
ENSG00000108468	CBX1	0.384	0.872098	1.18	1.18	75.73	64.4	0.00391	0.618	1.7	1.7	109	64.4	0.046	0.537	1.45	1.45	109	75.7
ENSG00000164916	FOXK1	0.349	0.860528	0.804	-1.24	95.32	118.55	0.00521	0.618	0.52	-1.92	61.6	119	0.0643	0.585	0.646	-1.55	61.6	95.3
ENSG00000198763	MT-ND2	6.47e-06	0.00631384	0.309	-3.24	5711.87	18500.2	0.00687	0.618	0.494	-2.02	9150	18500	0.0707	0.587	1.6	1.6	9150	5710
ENSG00000074370	ATP2A3	0.288	0.826928	0.669	-1.49	89	133.04	0.00457	0.618	0.34	-2.94	45.2	133	0.0762	0.587	0.508	-1.97	45.2	89
ENSG00000100852	ARHGAP5	0.334	0.849203	1.24	1.24	124.85	100.44	0.0059	0.618	1.85	1.85	186	100	0.0752	0.587	1.49	1.49	186	125
ENSG00000153179	RASSF3	0.34	0.851731	0.762	-1.31	371.67	487.5	0.00659	0.618	0.462	-2.17	225	487	0.0783	0.59	0.606	-1.65	225	372
ENSG00000182481	KPNA2	0.257	0.807631	0.734	-1.36	98.81	134.7	0.00455	0.618	0.459	-2.18	61.8	135	0.0893	0.609	0.626	-1.6	61.8	98.8
ENSG00000023516	AKAP11	0.214	0.794864	1.29	1.29	141.37	109.59	0.00588	0.618	1.75	1.75	192	110	0.132	0.65	1.36	1.36	192	141
ENSG00000148229	POLE3	0.186	0.773599	0.78	-1.28	175.16	224.66	0.00678	0.618	0.6	-1.67	135	225	0.168	0.675	0.77	-1.3	135	175
ENSG00000117151	CTBS	0.164	0.751081	1.55	1.55	38.08	24.61	0.00681	0.618	2.32	2.32	57	24.6	0.192	0.696	1.5	1.5	57	38.1
ENSG00000116918	TSNAX	0.0776	0.620953	0.738	-1.35	128.2	173.66	0.00535	0.618	0.619	-1.62	107	174	0.312	0.766	0.839	-1.19	107	128
ENSG00000113595	TRIM23	0.088	0.648315	1.43	1.43	46.74	32.64	0.00631	0.618	1.77	1.77	57.6	32.6	0.313	0.766	1.23	1.23	57.6	46.7
ENSG00000144028	SNRNP200	0.0557	0.577523	0.739	-1.35	219.16	296.43	0.00359	0.618	0.631	-1.58	187	296	0.321	0.77	0.854	-1.17	187	219
ENSG00000159348	CYB5R1	0.000154	0.0474943	0.305	-3.27	25.53	83.59	0.00478	0.618	0.417	-2.4	34.9	83.6	0.326	0.772	1.37	1.37	34.9	25.5
ENSG00000157514	TSC22D3	0.0763	0.619761	0.509	-1.96	1008.24	1979.92	0.00674	0.618	0.356	-2.81	706	1980	0.349	0.783	0.7	-1.43	706	1010
ENSG00000171943	SRGAP2C	0.0527	0.574165	1.5	1.5	80.26	53.48	0.00446	0.618	1.81	1.81	96.7	53.5	0.371	0.792	1.2	1.2	96.7	80.3
ENSG00000138814	PPP3CA	0.0459	0.545253	1.48	1.48	244.17	165.04	0.0047	0.618	1.74	1.74	287	165	0.409	0.815	1.18	1.18	287	244
ENSG00000181904	C5orf24	0.0461	0.546091	1.43	1.43	67.05	46.73	0.00676	0.618	1.63	1.63	76	46.7	0.484	0.854	1.13	1.13	76	67.1
ENSG00000137970	RPL7P9	0.0181	0.444548	0.611	-1.64	942.59	1543.31	0.0042	0.618	0.55	-1.82	849	1540	0.618	0.902	0.901	-1.11	849	943
ENSG00000103275	UBE2I	0.00119	0.169358	0.462	-2.16	195.29	422.63	0.00593	0.618	0.52	-1.92	220	423	0.622	0.903	1.13	1.13	220	195
ENSG00000136603	SKIL	0.012	0.382909	2.05	2.05	61.63	30.03	0.00451	0.618	2.25	2.25	67.5	30	0.748	0.938	1.09	1.09	67.5	61.6
ENSG00000155380	SLC16A1	0.00297	0.256015	2	2	58.96	29.55	0.00686	0.618	1.87	1.87	55.4	29.5	0.783	0.945	0.939	-1.07	55.4	59
ENSG00000005812	FBXL3	0.00188	0.216027	1.78	1.78	128.68	72.27	0.00421	0.618	1.7	1.7	123	72.3	0.8	0.951	0.954	-1.05	123	129
ENSG00000124802	EEF1E1	0.8	0.971146	1.08	1.08	93.23	86.24	0.00704	0.624	0.431	-2.32	37.2	86.2	0.0033	0.354	0.399	-2.51	37.2	93.2
ENSG00000162639	HENMT1	0.328	0.8479	1.25	1.25	36.7	29.46	0.0111	0.639	0.551	-1.81	16.2	29.5	0.000521	0.169	0.442	-2.26	16.2	36.7
ENSG00000181404	WASHC1	0.988	0.996765	0.994	-1.01	19.93	20.05	0.0112	0.639	0.353	-2.83	7.07	20	0.0122	0.445	0.355	-2.82	7.07	19.9
ENSG00000152382	TADA1	0.845	0.975636	0.951	-1.05	66.18	69.61	0.01	0.639	0.511	-1.96	35.6	69.6	0.0179	0.483	0.537	-1.86	35.6	66.2
ENSG00000147604	RPL7	0.73	0.96174	0.91	-1.1	1256.25	1381.15	0.0103	0.639	0.494	-2.02	683	1380	0.0264	0.509	0.543	-1.84	683	1260
ENSG00000152409	JMY	0.553	0.917931	1.18	1.18	103.05	87.55	0.00771	0.639	2.07	2.07	181	87.5	0.039	0.516	1.76	1.76	181	103
ENSG00000232176	---	0.65	0.939566	0.897	-1.11	724.92	807.75	0.0109	0.639	0.545	-1.84	440	808	0.0366	0.516	0.607	-1.65	440	725
ENSG00000118503	TNFAIP3	0.504	0.907689	0.885	-1.13	519.57	587.2	0.0103	0.639	0.625	-1.6	367	587	0.0582	0.57	0.706	-1.42	367	520
ENSG00000225484	NUTM2B-AS1	0.511	0.90933	1.22	1.22	90.32	73.83	0.0107	0.639	2.18	2.18	161	73.8	0.0588	0.572	1.78	1.78	161	90.3
ENSG00000167515	TRAPPC2L	0.418	0.881684	0.811	-1.23	103.51	127.59	0.00898	0.639	0.508	-1.97	64.8	128	0.0723	0.587	0.626	-1.6	64.8	104
ENSG00000087266	SH3BP2	0.399	0.875221	0.707	-1.42	88.89	125.81	0.0103	0.639	0.346	-2.89	43.5	126	0.0854	0.598	0.49	-2.04	43.5	88.9
ENSG00000171608	PIK3CD	0.377	0.870218	0.858	-1.17	483.08	562.95	0.00977	0.639	0.639	-1.56	360	563	0.0898	0.609	0.745	-1.34	360	483
ENSG00000114416	FXR1	0.365	0.866812	1.27	1.27	165.26	130.27	0.0105	0.639	1.95	1.95	255	130	0.0992	0.619	1.54	1.54	255	165
ENSG00000119471	HSDL2	0.378	0.870218	1.22	1.22	27.05	22.24	0.0106	0.639	1.74	1.74	38.8	22.2	0.0994	0.619	1.43	1.43	38.8	27.1
ENSG00000226525	RPS7P10	0.288	0.826928	0.668	-1.5	221.05	330.88	0.0108	0.639	0.379	-2.64	125	331	0.137	0.656	0.567	-1.76	125	221
ENSG00000104529	EEF1D	5.12e-05	0.0270256	0.455	-2.2	488.68	1074.23	0.00914	0.639	0.603	-1.66	648	1070	0.148	0.663	1.33	1.33	648	489
ENSG00000248727	LINC01948	0.257	0.808437	0.647	-1.54	18.3	28.28	0.00941	0.639	0.362	-2.76	10.2	28.3	0.144	0.663	0.56	-1.79	10.2	18.3
ENSG00000156273	BACH1	8.32e-05	0.0304287	2.51	2.51	56.17	22.38	0.011	0.639	1.82	1.82	40.7	22.4	0.161	0.668	0.725	-1.38	40.7	56.2
ENSG00000124198	ARFGEF2	0.155	0.741354	1.41	1.41	65.9	46.82	0.0109	0.639	1.83	1.83	85.9	46.8	0.266	0.749	1.3	1.3	85.9	65.9
ENSG00000153201	RANBP2	0.12	0.701446	1.23	1.23	229.94	186.7	0.00754	0.639	1.43	1.43	266	187	0.269	0.75	1.16	1.16	266	230
ENSG00000175567	UCP2	0.000297	0.0756147	0.375	-2.67	112.78	300.75	0.0115	0.639	0.505	-1.98	152	301	0.274	0.755	1.35	1.35	152	113
ENSG00000265241	RBM8A	0.14	0.726364	0.774	-1.29	312.75	404.12	0.0113	0.639	0.644	-1.55	260	404	0.293	0.76	0.832	-1.2	260	313
ENSG00000160563	MED27	0.104	0.676178	0.589	-1.7	45.48	77.29	0.00908	0.639	0.425	-2.35	32.9	77.3	0.327	0.772	0.723	-1.38	32.9	45.5
ENSG00000181929	PRKAG1	0.112	0.690734	0.711	-1.41	77.84	109.43	0.0114	0.639	0.581	-1.72	63.6	109	0.352	0.785	0.817	-1.22	63.6	77.8
ENSG00000160888	IER2	0.000653	0.130448	0.502	-1.99	261.75	520.91	0.00921	0.639	0.592	-1.69	308	521	0.419	0.822	1.18	1.18	308	262
ENSG00000122376	SHLD2	0.0671	0.593108	0.608	-1.64	73.39	120.68	0.00994	0.639	0.496	-2.02	59.9	121	0.458	0.842	0.816	-1.23	59.9	73.4
ENSG00000175893	ZDHHC21	0.0557	0.577523	1.65	1.65	55.73	33.77	0.00873	0.639	1.98	1.98	66.8	33.8	0.483	0.854	1.2	1.2	66.8	55.7
ENSG00000185896	LAMP1	0.0482	0.560476	0.652	-1.53	147.16	225.72	0.00879	0.639	0.567	-1.76	128	226	0.522	0.872	0.87	-1.15	128	147
ENSG00000131165	CHMP1A	0.0408	0.535439	0.615	-1.63	41.48	67.45	0.00882	0.639	0.536	-1.86	36.2	67.5	0.573	0.891	0.872	-1.15	36.2	41.5
ENSG00000198840	MT-ND3	0.00206	0.221774	0.381	-2.62	13931.7	36539.6	0.00735	0.639	0.432	-2.31	15800	36500	0.688	0.918	1.13	1.13	15800	13900
ENSG00000131871	SELENOS	0.0236	0.469641	0.601	-1.66	50.43	83.93	0.00821	0.639	0.552	-1.81	46.3	83.9	0.712	0.929	0.919	-1.09	46.3	50.4
ENSG00000130414	NDUFA10	0.0192	0.444548	0.629	-1.59	145.97	232.11	0.00816	0.639	0.592	-1.69	138	232	0.765	0.94	0.942	-1.06	138	146
ENSG00000123338	NCKAP1L	0.0194	0.444548	0.626	-1.6	391.15	624.93	0.00917	0.639	0.593	-1.69	371	625	0.79	0.946	0.948	-1.06	371	391
ENSG00000160075	SSU72	0.0189	0.444548	0.613	-1.63	79.55	129.7	0.0111	0.639	0.59	-1.69	76.6	130	0.855	0.964	0.962	-1.04	76.6	79.6
ENSG00000279423	---	0.0127	0.392612	0.332	-3.01	15.03	45.22	0.00798	0.639	0.31	-3.22	14	45.2	0.878	0.969	0.933	-1.07	14	15
ENSG00000130706	ADRM1	0.0116	0.382909	0.481	-2.08	33.74	70.1	0.00746	0.639	0.461	-2.17	32.3	70.1	0.886	0.97	0.958	-1.04	32.3	33.7
ENSG00000154930	ACSS1	0.00725	0.339452	0.592	-1.69	79.32	134.07	0.00862	0.639	0.6	-1.67	80.4	134	0.946	0.985	1.01	1.01	80.4	79.3
ENSG00000105122	RASAL3	0.012	0.382909	0.528	-1.89	86.5	163.7	0.0104	0.639	0.522	-1.91	85.5	164	0.964	0.989	0.989	-1.01	85.5	86.5
ENSG00000110344	UBE4A	0.0104	0.381017	1.77	1.77	67.42	38.14	0.0114	0.639	1.75	1.75	66.8	38.1	0.966	0.99	0.991	-1.01	66.8	67.4
ENSG00000182810	DDX28	0.00976	0.37392	0.429	-2.33	19.84	46.21	0.00921	0.639	0.428	-2.34	19.8	46.2	0.993	0.998	0.997	-1	19.8	19.8
ENSG00000186222	BLOC1S4	0.381	0.870218	0.8	-1.25	85.13	106.41	0.0116	0.642	0.524	-1.91	55.7	106	0.101	0.619	0.655	-1.53	55.7	85.1
ENSG00000182010	RTKN2	0.0697	0.601645	1.44	1.44	622.46	433.35	0.0119	0.65	1.65	1.65	716	433	0.484	0.854	1.15	1.15	716	622
ENSG00000175197	DDIT3	0.032	0.502255	0.485	-2.06	16.04	33.05	0.0121	0.654	0.429	-2.33	14.2	33	0.722	0.933	0.884	-1.13	14.2	16
ENSG00000243789	JMJD7	0.781	0.970592	0.919	-1.09	38.2	41.55	0.0127	0.658	0.463	-2.16	19.2	41.6	0.0277	0.511	0.504	-1.98	19.2	38.2
ENSG00000103429	BFAR	0.66	0.942595	0.9	-1.11	74.46	82.76	0.0123	0.658	0.545	-1.83	45.1	82.8	0.04	0.52	0.606	-1.65	45.1	74.5
ENSG00000152193	OBI1	0.49	0.905912	0.834	-1.2	70.81	84.92	0.0129	0.658	0.517	-1.93	43.9	84.9	0.0737	0.587	0.62	-1.61	43.9	70.8
ENSG00000183808	RBM12B	0.502	0.906518	1.2	1.2	85.37	70.91	0.0135	0.658	1.97	1.97	140	70.9	0.0731	0.587	1.64	1.64	140	85.4
ENSG00000129925	PGAP6	0.127	0.713909	0.632	-1.58	43.53	68.85	0.0136	0.658	0.475	-2.1	32.7	68.8	0.349	0.783	0.751	-1.33	32.7	43.5
ENSG00000241728	---	0.105	0.67718	0.645	-1.55	28.84	44.69	0.0131	0.658	0.51	-1.96	22.8	44.7	0.395	0.806	0.79	-1.27	22.8	28.8
ENSG00000241685	ARPC1A	0.0649	0.58792	0.47	-2.13	20.83	44.3	0.0133	0.658	0.362	-2.76	16	44.3	0.531	0.873	0.77	-1.3	16	20.8
ENSG00000175105	ZNF654	0.0611	0.579042	1.77	1.77	47.36	26.82	0.0127	0.658	2.12	2.12	56.9	26.8	0.539	0.875	1.2	1.2	56.9	47.4
ENSG00000149231	CCDC82	0.062	0.581264	1.34	1.34	172.81	129.37	0.0134	0.658	1.47	1.47	190	129	0.549	0.881	1.1	1.1	190	173
ENSG00000163399	ATP1A1	0.0516	0.568508	0.646	-1.55	146.61	226.98	0.0135	0.658	0.574	-1.74	130	227	0.604	0.898	0.889	-1.12	130	147
ENSG00000163110	PDLIM5	0.00388	0.294813	0.528	-1.89	95.89	181.57	0.0133	0.658	0.58	-1.72	105	182	0.675	0.916	1.1	1.1	105	95.9
ENSG00000108604	SMARCD2	0.0305	0.491357	0.565	-1.77	146	258.36	0.013	0.658	0.52	-1.92	134	258	0.751	0.938	0.919	-1.09	134	146
ENSG00000142188	TMEM50B	0.00681	0.335068	0.574	-1.74	70.27	122.44	0.0127	0.658	0.601	-1.66	73.6	122	0.824	0.956	1.05	1.05	73.6	70.3
ENSG00000155393	HEATR3	0.395	0.874218	1.26	1.26	79.74	63.21	0.0144	0.665	0.507	-1.97	32	63.2	0.00105	0.236	0.401	-2.49	32	79.7
ENSG00000245164	LINC00861	0.843	0.975402	1.04	1.04	413.63	398.72	0.0144	0.665	1.57	1.57	627	399	0.0248	0.494	1.51	1.51	627	414
ENSG00000172216	CEBPB	0.566	0.918863	0.803	-1.25	38.86	48.41	0.014	0.665	0.386	-2.59	18.7	48.4	0.0604	0.575	0.48	-2.08	18.7	38.9
ENSG00000214106	PAXIP1-AS2	0.512	0.90933	1.2	1.2	26.4	21.97	0.0142	0.665	1.96	1.96	43.1	22	0.0759	0.587	1.63	1.63	43.1	26.4
ENSG00000177565	TBL1XR1	0.0596	0.579042	1.33	1.33	237.35	178.9	0.0143	0.665	1.44	1.44	258	179	0.575	0.891	1.09	1.09	258	237
ENSG00000141524	TMC6	0.00355	0.276737	0.518	-1.93	135.75	262.27	0.0142	0.665	0.576	-1.74	151	262	0.64	0.906	1.11	1.11	151	136
ENSG00000259834	---	0.589	0.926272	1.13	1.13	167.85	148.32	0.0161	0.685	1.73	1.73	257	148	0.063	0.585	1.53	1.53	257	168
ENSG00000240509	RPL34P18	0.363	0.866069	0.754	-1.33	692.85	918.43	0.0154	0.685	0.472	-2.12	434	918	0.131	0.647	0.626	-1.6	434	693
ENSG00000157379	DHRS1	0.256	0.807491	0.786	-1.27	68.61	87.31	0.0153	0.685	0.596	-1.68	52.1	87.3	0.201	0.697	0.759	-1.32	52.1	68.6
ENSG00000179562	GCC1	0.205	0.791753	0.691	-1.45	91.37	132.23	0.0157	0.685	0.493	-2.03	65.2	132	0.252	0.742	0.714	-1.4	65.2	91.4
ENSG00000132432	SEC61G	0.167	0.751855	0.688	-1.45	107	155.58	0.0156	0.685	0.519	-1.93	80.8	156	0.303	0.762	0.755	-1.32	80.8	107
ENSG00000118596	SLC16A7	0.119	0.700462	1.36	1.36	162.47	119.19	0.0162	0.685	1.61	1.61	192	119	0.401	0.81	1.18	1.18	192	162
ENSG00000180370	PAK2	0.0708	0.604604	1.29	1.29	243.21	189.25	0.0158	0.685	1.4	1.4	264	189	0.549	0.881	1.09	1.09	264	243
ENSG00000090447	TFAP4	0.0636	0.586072	0.555	-1.8	17.32	31.2	0.0161	0.685	0.465	-2.15	14.5	31.2	0.587	0.896	0.837	-1.19	14.5	17.3
ENSG00000108883	EFTUD2	0.0589	0.579042	1.6	1.6	41.61	25.98	0.0151	0.685	1.82	1.82	47.4	26	0.595	0.898	1.14	1.14	47.4	41.6
ENSG00000136738	STAM	0.0542	0.577523	1.43	1.43	236.8	165.73	0.0157	0.685	1.56	1.56	259	166	0.626	0.904	1.09	1.09	259	237
ENSG00000167986	DDB1	0.0149	0.407541	0.512	-1.95	152.84	298.65	0.0161	0.685	0.516	-1.94	154	299	0.976	0.993	1.01	1.01	154	153
ENSG00000248527	MTATP6P1	4.32e-08	0.000126383	0.126	-7.91	240	1897.93	0.0183	0.688	0.411	-2.43	780	1900	0.0018	0.264	3.25	3.25	780	240
ENSG00000198886	MT-ND4	1.33e-06	0.00194564	0.275	-3.64	5959.81	21673.6	0.02	0.688	0.537	-1.86	11600	21700	0.0121	0.445	1.95	1.95	11600	5960
ENSG00000185046	ANKS1B	0.827	0.975118	1.09	1.09	64.7	59.51	0.0204	0.688	0.408	-2.45	24.3	59.5	0.0114	0.445	0.375	-2.67	24.3	64.7
ENSG00000101654	RNMT	0.601	0.928744	0.918	-1.09	235.96	256.98	0.0185	0.688	0.68	-1.47	175	257	0.0679	0.587	0.741	-1.35	175	236
ENSG00000174446	SNAPC5	0.624	0.935905	0.847	-1.18	28.28	33.39	0.0196	0.688	0.447	-2.23	14.9	33.4	0.0666	0.587	0.528	-1.89	14.9	28.3
ENSG00000105176	URI1	0.547	0.916831	1.16	1.16	184.74	159.59	0.0181	0.688	1.77	1.77	283	160	0.0791	0.59	1.53	1.53	283	185
ENSG00000006194	ZNF263	0.569	0.919867	0.858	-1.17	53.43	62.25	0.0196	0.688	0.531	-1.88	33.1	62.2	0.0792	0.59	0.619	-1.62	33.1	53.4
ENSG00000130724	CHMP2A	7.74e-05	0.0302199	0.386	-2.59	39.18	101.62	0.0192	0.688	0.574	-1.74	58.3	102	0.104	0.622	1.49	1.49	58.3	39.2
ENSG00000137075	RNF38	0.271	0.819151	0.802	-1.25	74.95	93.49	0.0181	0.688	0.621	-1.61	58	93.5	0.21	0.71	0.774	-1.29	58	74.9
ENSG00000125755	SYMPK	0.247	0.800831	0.703	-1.42	72.79	103.55	0.0177	0.688	0.485	-2.06	50.2	104	0.226	0.72	0.689	-1.45	50.2	72.8
ENSG00000108256	NUFIP2	0.233	0.797138	1.22	1.22	304.79	250.35	0.0201	0.688	1.47	1.47	367	250	0.26	0.746	1.2	1.2	367	305
ENSG00000152291	TGOLN2	0.227	0.795623	0.755	-1.32	901.09	1193.89	0.0198	0.688	0.581	-1.72	694	1190	0.263	0.749	0.77	-1.3	694	901
ENSG00000240849	PEDS1	0.211	0.791977	0.706	-1.42	32.7	46.32	0.0204	0.688	0.522	-1.91	24.2	46.3	0.29	0.76	0.74	-1.35	24.2	32.7
ENSG00000204406	MBD5	0.171	0.754948	1.4	1.4	123.3	88.22	0.0187	0.688	1.77	1.77	156	88.2	0.329	0.772	1.27	1.27	156	123
ENSG00000176783	RUFY1	0.157	0.745466	1.32	1.32	60.53	45.94	0.017	0.688	1.58	1.58	72.8	45.9	0.339	0.779	1.2	1.2	72.8	60.5
ENSG00000087191	PSMC5	0.149	0.737767	0.708	-1.41	75.76	107	0.0185	0.688	0.569	-1.76	60.9	107	0.366	0.791	0.803	-1.24	60.9	75.8
ENSG00000147601	TERF1	0.152	0.740895	1.38	1.38	117.01	85.02	0.0193	0.688	1.68	1.68	143	85	0.368	0.791	1.22	1.22	143	117
ENSG00000124201	ZNFX1	0.142	0.730179	0.678	-1.48	229.33	338.32	0.0187	0.688	0.536	-1.86	181	338	0.378	0.795	0.791	-1.26	181	229
ENSG00000169976	SF3B5	0.135	0.724374	0.761	-1.31	104.78	137.75	0.0187	0.688	0.65	-1.54	89.5	138	0.396	0.806	0.855	-1.17	89.5	105
ENSG00000166619	BLCAP	0.114	0.694875	0.738	-1.35	54.05	73.23	0.017	0.688	0.632	-1.58	46.3	73.2	0.428	0.826	0.856	-1.17	46.3	54.1
ENSG00000124226	RNF114	0.08	0.631605	0.729	-1.37	78.26	107.37	0.0174	0.688	0.651	-1.54	69.9	107	0.537	0.874	0.893	-1.12	69.9	78.3
ENSG00000109171	SLAIN2	0.00405	0.303957	1.6	1.6	152.06	94.88	0.0204	0.688	1.46	1.46	139	94.9	0.576	0.891	0.913	-1.1	139	152
ENSG00000158669	GPAT4	0.00368	0.283779	0.543	-1.84	78.58	144.83	0.0175	0.688	0.608	-1.64	88.1	145	0.592	0.898	1.12	1.12	88.1	78.6
ENSG00000155229	MMS19	0.0696	0.601645	0.68	-1.47	217.23	319.32	0.0204	0.688	0.611	-1.64	195	319	0.616	0.902	0.898	-1.11	195	217
ENSG00000130813	SHFL	0.00513	0.316478	0.549	-1.82	45.61	83.11	0.0204	0.688	0.611	-1.64	50.8	83.1	0.624	0.903	1.11	1.11	50.8	45.6
ENSG00000063854	HAGH	0.0597	0.579042	0.613	-1.63	42.51	69.4	0.0185	0.688	0.542	-1.85	37.6	69.4	0.643	0.906	0.885	-1.13	37.6	42.5
ENSG00000261915	---	0.0107	0.382909	0.421	-2.38	12.72	30.23	0.02	0.688	0.458	-2.18	13.8	30.2	0.808	0.953	1.09	1.09	13.8	12.7
ENSG00000075089	ACTR6	0.0329	0.503475	1.55	1.55	42.19	27.26	0.0181	0.688	1.62	1.62	44.1	27.3	0.827	0.956	1.05	1.05	44.1	42.2
ENSG00000265808	SEC22B	0.0302	0.491357	1.4	1.4	113.14	80.6	0.0174	0.688	1.45	1.45	117	80.6	0.841	0.96	1.03	1.03	117	113
ENSG00000058063	ATP11B	0.0118	0.382909	1.69	1.69	77.45	45.88	0.0191	0.688	1.63	1.63	74.6	45.9	0.857	0.964	0.964	-1.04	74.6	77.4
ENSG00000214113	LYRM4	0.0315	0.498495	0.478	-2.09	13.64	28.54	0.0191	0.688	0.448	-2.23	12.8	28.5	0.856	0.964	0.938	-1.07	12.8	13.6
ENSG00000167552	TUBA1A	0.0132	0.396168	0.498	-2.01	151.43	303.92	0.0201	0.688	0.521	-1.92	158	304	0.876	0.969	1.04	1.04	158	151
ENSG00000173559	NABP1	0.0133	0.396168	1.43	1.43	171.06	119.39	0.0189	0.688	1.4	1.4	168	119	0.892	0.973	0.981	-1.02	168	171
ENSG00000089220	PEBP1	0.0136	0.398599	0.677	-1.48	322.41	476.01	0.0165	0.688	0.685	-1.46	326	476	0.942	0.984	1.01	1.01	326	322
ENSG00000180008	SOCS4	0.0174	0.434535	1.82	1.82	53.46	29.44	0.02	0.688	1.79	1.79	52.7	29.4	0.952	0.987	0.985	-1.01	52.7	53.5
ENSG00000090060	PAPOLA	0.0193	0.444548	1.39	1.39	373.75	268.73	0.0201	0.688	1.39	1.39	373	269	0.986	0.997	0.998	-1	373	374
ENSG00000164975	SNAPC3	0.913	0.985663	0.973	-1.03	36.52	37.52	0.0222	0.69	1.75	1.75	65.5	37.5	0.0176	0.483	1.79	1.79	65.5	36.5
ENSG00000223496	EXOSC6	0.586	0.92621	0.911	-1.1	216.65	237.87	0.0218	0.69	0.674	-1.48	160	238	0.0813	0.593	0.74	-1.35	160	217
ENSG00000108055	SMC3	0.474	0.897503	1.12	1.12	402.54	358.73	0.0213	0.69	1.45	1.45	519	359	0.114	0.625	1.29	1.29	519	403
ENSG00000165288	BRWD3	0.456	0.892202	1.15	1.15	101.06	87.94	0.0215	0.69	1.53	1.53	134	87.9	0.124	0.633	1.33	1.33	134	101
ENSG00000185187	SIGIRR	0.259	0.809316	0.738	-1.36	77.99	105.69	0.0213	0.69	0.537	-1.86	56.8	106	0.243	0.735	0.728	-1.37	56.8	78
ENSG00000213339	QTRT1	0.213	0.792208	0.687	-1.46	22.2	32.33	0.022	0.69	0.498	-2.01	16.1	32.3	0.301	0.762	0.725	-1.38	16.1	22.2
ENSG00000168397	ATG4B	0.178	0.765271	0.695	-1.44	60.8	87.52	0.0218	0.69	0.537	-1.86	47	87.5	0.347	0.782	0.773	-1.29	47	60.8
ENSG00000178177	LCORL	0.159	0.745646	1.43	1.43	86.73	60.59	0.0217	0.69	1.79	1.79	108	60.6	0.379	0.796	1.25	1.25	108	86.7
ENSG00000139679	LPAR6	0.00272	0.249074	2.15	2.15	157.1	73.05	0.0216	0.69	1.8	1.8	131	73.1	0.483	0.854	0.837	-1.2	131	157
ENSG00000132570	PCBD2	0.0964	0.655804	0.675	-1.48	34.91	51.69	0.021	0.69	0.579	-1.73	30	51.7	0.526	0.872	0.858	-1.17	30	34.9
ENSG00000203668	CHML	0.0125	0.391764	1.86	1.86	54.64	29.44	0.0218	0.69	1.76	1.76	51.9	29.4	0.834	0.959	0.95	-1.05	51.9	54.6
ENSG00000012061	ERCC1	0.0154	0.40863	0.466	-2.15	15.75	33.83	0.0221	0.69	0.488	-2.05	16.5	33.8	0.883	0.97	1.05	1.05	16.5	15.7
ENSG00000222041	CYTOR	0.0156	0.40863	1.61	1.61	134.93	83.74	0.0221	0.69	1.57	1.57	131	83.7	0.893	0.973	0.974	-1.03	131	135
ENSG00000174718	RESF1	0.0269	0.47495	1.64	1.64	650.35	397.18	0.0213	0.69	1.67	1.67	663	397	0.929	0.983	1.02	1.02	663	650
ENSG00000223676	RPL34P26	0.67	0.945307	0.875	-1.14	369.93	422.72	0.0225	0.698	0.489	-2.04	207	423	0.0638	0.585	0.559	-1.79	207	370
ENSG00000178149	DALRD3	0.333	0.8479	0.808	-1.24	121.83	150.78	0.023	0.698	0.606	-1.65	91.3	151	0.194	0.696	0.749	-1.33	91.3	122
ENSG00000068831	RASGRP2	0.0552	0.577523	0.55	-1.82	216.95	394.71	0.023	0.698	0.492	-2.03	194	395	0.723	0.933	0.895	-1.12	194	217
ENSG00000197818	SLC9A8	0.0367	0.514352	0.496	-2.02	22.73	45.86	0.0227	0.698	0.466	-2.15	21.4	45.9	0.856	0.964	0.94	-1.06	21.4	22.7
ENSG00000127824	TUBA4A	0.0154	0.40863	0.544	-1.84	131.06	240.82	0.0229	0.698	0.565	-1.77	136	241	0.881	0.97	1.04	1.04	136	131
ENSG00000095319	NUP188	0.679	0.949524	1.11	1.11	58.08	52.46	0.0236	0.708	0.568	-1.76	29.8	52.5	0.00785	0.402	0.513	-1.95	29.8	58.1
ENSG00000134759	ELP2	0.146	0.732676	0.773	-1.29	163.2	211.24	0.0235	0.708	0.669	-1.49	141	211	0.421	0.822	0.866	-1.15	141	163
ENSG00000181555	SETD2	0.286	0.826928	1.2	1.2	316.32	263.58	0.0238	0.711	1.47	1.47	388	264	0.234	0.725	1.23	1.23	388	316
ENSG00000102908	NFAT5	0.192	0.779002	1.55	1.55	106.12	68.52	0.0242	0.716	2.12	2.12	146	68.5	0.344	0.78	1.37	1.37	146	106
ENSG00000264247	ZNF407-AS1	0.0834	0.642141	1.69	1.69	21.09	12.51	0.0242	0.716	1.96	1.96	24.5	12.5	0.61	0.898	1.16	1.16	24.5	21.1
ENSG00000149212	SESN3	0.0943	0.651721	1.56	1.56	807.03	518.4	0.0245	0.718	1.81	1.81	939	518	0.565	0.889	1.16	1.16	939	807
ENSG00000237945	LINC00649	0.0584	0.579042	1.67	1.67	97.64	58.6	0.0246	0.718	1.83	1.83	107	58.6	0.725	0.933	1.1	1.1	107	97.6
ENSG00000132323	ILKAP	0.0974	0.659019	1.35	1.35	122.68	90.74	0.0266	0.721	0.664	-1.51	60.2	90.7	0.00012	0.163	0.491	-2.04	60.2	123
ENSG00000155660	PDIA4	0.174	0.759891	1.55	1.55	114.68	73.98	0.026	0.721	0.483	-2.07	35.8	74	0.000356	0.163	0.312	-3.21	35.8	115
ENSG00000131043	AAR2	0.345	0.856915	1.27	1.27	50.98	40.19	0.0256	0.721	0.562	-1.78	22.6	40.2	0.00165	0.264	0.443	-2.26	22.6	51
ENSG00000250321	---	0.458	0.89231	1.23	1.23	106.71	86.74	0.0282	0.721	0.538	-1.86	46.7	86.7	0.00344	0.354	0.438	-2.29	46.7	107
ENSG00000182220	ATP6AP2	0.795	0.971146	1.06	1.06	210.55	198.98	0.0253	0.721	0.613	-1.63	122	199	0.0128	0.449	0.579	-1.73	122	211
ENSG00000165312	OTUD1	0.882	0.980973	1.06	1.06	65.86	61.9	0.0272	0.721	0.394	-2.54	24.4	61.9	0.0187	0.483	0.37	-2.7	24.4	65.9
ENSG00000198689	SLC9A6	0.709	0.955359	0.917	-1.09	73.47	80.08	0.0262	0.721	0.596	-1.68	47.7	80.1	0.0659	0.587	0.65	-1.54	47.7	73.5
ENSG00000185658	BRWD1	0.629	0.935905	1.08	1.08	281.76	261.09	0.0278	0.721	1.41	1.41	369	261	0.0873	0.608	1.31	1.31	369	282
ENSG00000112592	TBP	0.588	0.926272	0.881	-1.14	62.59	71.07	0.0266	0.721	0.592	-1.69	42.1	71.1	0.0958	0.619	0.672	-1.49	42.1	62.6
ENSG00000256594	---	0.548	0.916831	0.78	-1.28	35.3	45.26	0.0259	0.721	0.394	-2.54	17.8	45.3	0.105	0.622	0.505	-1.98	17.8	35.3
ENSG00000036054	TBC1D23	0.353	0.862806	1.27	1.27	32.89	25.98	0.0283	0.721	1.73	1.73	45	26	0.212	0.713	1.37	1.37	45	32.9
ENSG00000175054	ATR	0.341	0.851731	1.2	1.2	151.74	126.33	0.0283	0.721	1.52	1.52	192	126	0.217	0.718	1.27	1.27	192	152
ENSG00000144867	SRPRB	0.329	0.8479	0.806	-1.24	94.39	117.06	0.0278	0.721	0.615	-1.63	72	117	0.224	0.719	0.763	-1.31	72	94.4
ENSG00000005810	MYCBP2	0.314	0.842047	1.21	1.21	509.04	420.94	0.0268	0.721	1.52	1.52	639	421	0.228	0.72	1.26	1.26	639	509
ENSG00000179918	SEPHS2	0.000854	0.146953	1.73	1.73	85.57	49.35	0.0266	0.721	1.44	1.44	71.2	49.3	0.262	0.749	0.832	-1.2	71.2	85.6
ENSG00000185753	CXorf38	0.281	0.826928	0.759	-1.32	48.37	63.71	0.0282	0.721	0.569	-1.76	36.3	63.7	0.268	0.75	0.75	-1.33	36.3	48.4
ENSG00000205413	SAMD9	0.253	0.806416	1.34	1.34	169.33	125.98	0.0252	0.721	1.78	1.78	224	126	0.275	0.755	1.33	1.33	224	169
ENSG00000254996	ANKHD1-EIF4EBP3	0.226	0.795623	1.79	1.79	17.44	9.76	0.0257	0.721	2.88	2.88	28.1	9.76	0.31	0.766	1.61	1.61	28.1	17.4
ENSG00000145216	FIP1L1	0.175	0.76151	0.779	-1.28	152.04	195.1	0.0257	0.721	0.663	-1.51	129	195	0.385	0.799	0.851	-1.18	129	152
ENSG00000128228	SDF2L1	0.00246	0.240523	0.347	-2.88	38.52	110.98	0.025	0.721	0.459	-2.18	51	111	0.427	0.826	1.32	1.32	51	38.5
ENSG00000198624	CCDC69	0.00331	0.276704	0.404	-2.48	226.37	560.65	0.0256	0.721	0.502	-1.99	282	561	0.48	0.854	1.24	1.24	282	226
ENSG00000077312	SNRPA	0.131	0.719047	0.658	-1.52	17.5	26.61	0.0275	0.721	0.541	-1.85	14.4	26.6	0.496	0.859	0.822	-1.22	14.4	17.5
ENSG00000103591	AAGAB	0.0856	0.648315	0.62	-1.61	46.24	74.61	0.026	0.721	0.538	-1.86	40.1	74.6	0.616	0.902	0.868	-1.15	40.1	46.2
ENSG00000273611	ZNHIT3	0.0874	0.648315	0.589	-1.7	66.06	112.08	0.0281	0.721	0.507	-1.97	56.8	112	0.63	0.904	0.86	-1.16	56.8	66.1
ENSG00000124788	ATXN1	0.0794	0.630631	1.39	1.39	213.82	153.64	0.0268	0.721	1.52	1.52	233	154	0.648	0.908	1.09	1.09	233	214
ENSG00000119906	SLF2	0.0652	0.589407	1.46	1.46	85.23	58.37	0.0271	0.721	1.57	1.57	91.7	58.4	0.72	0.933	1.08	1.08	91.7	85.2
ENSG00000169905	TOR1AIP2	0.0458	0.544509	1.44	1.44	114.51	79.74	0.0273	0.721	1.49	1.49	119	79.7	0.84	0.96	1.04	1.04	119	115
ENSG00000233927	RPS28	0.0229	0.459701	0.49	-2.04	1692.03	3450.21	0.0267	0.721	0.5	-2	1720	3450	0.952	0.987	1.02	1.02	1720	1690
ENSG00000113593	PPWD1	0.0256	0.47495	1.53	1.53	102.45	67.04	0.0275	0.721	1.52	1.52	102	67	0.973	0.992	0.994	-1.01	102	102
ENSG00000013306	SLC25A39	0.0269	0.47495	0.565	-1.77	25.42	44.98	0.0271	0.721	0.567	-1.76	25.5	45	0.989	0.998	1	1	25.5	25.4
ENSG00000128694	OSGEPL1	0.357	0.864271	0.796	-1.26	44.34	55.69	0.0287	0.724	0.58	-1.72	32.3	55.7	0.209	0.709	0.728	-1.37	32.3	44.3
ENSG00000197329	PELI1	0.0677	0.595368	0.599	-1.67	118.7	198.22	0.0287	0.724	0.541	-1.85	107	198	0.72	0.933	0.904	-1.11	107	119
ENSG00000106803	SEC61B	0.44	0.889724	1.27	1.27	315.65	247.8	0.0314	0.73	0.508	-1.97	126	248	0.00349	0.354	0.399	-2.51	126	316
ENSG00000146067	FAM193B	0.647	0.938294	1.12	1.12	71.34	63.65	0.0298	0.73	0.578	-1.73	36.8	63.6	0.00891	0.414	0.516	-1.94	36.8	71.3
ENSG00000184164	CRELD2	0.717	0.958767	1.11	1.11	54.28	48.74	0.0308	0.73	0.522	-1.92	25.4	48.7	0.0122	0.445	0.468	-2.14	25.4	54.3
ENSG00000182551	ADI1	0.73	0.96174	0.906	-1.1	65.77	72.58	0.0297	0.73	0.534	-1.87	38.8	72.6	0.0684	0.587	0.589	-1.7	38.8	65.8
ENSG00000113812	ACTR8	0.664	0.944901	0.842	-1.19	37.58	44.66	0.0292	0.73	0.416	-2.4	18.6	44.7	0.0817	0.595	0.495	-2.02	18.6	37.6
ENSG00000185477	GPRIN3	0.69	0.951268	1.11	1.11	142.24	128.32	0.032	0.73	1.73	1.73	223	128	0.0819	0.595	1.56	1.56	223	142
ENSG00000115825	PRKD3	0.652	0.940266	1.12	1.12	68.67	61.38	0.0313	0.73	1.7	1.7	104	61.4	0.0906	0.611	1.52	1.52	104	68.7
ENSG00000169045	HNRNPH1	0.606	0.930846	0.903	-1.11	1400.29	1551.45	0.0316	0.73	0.652	-1.53	1010	1550	0.103	0.621	0.723	-1.38	1010	1400
ENSG00000083097	DOP1A	0.598	0.928744	1.12	1.12	34.41	30.65	0.032	0.73	1.59	1.59	48.6	30.7	0.111	0.623	1.41	1.41	48.6	34.4
ENSG00000070413	DGCR2	0.534	0.916831	0.841	-1.19	78.46	93.28	0.0319	0.73	0.549	-1.82	51.2	93.3	0.129	0.644	0.653	-1.53	51.2	78.5
ENSG00000158122	PRXL2C	0.451	0.892157	0.777	-1.29	37.27	47.96	0.0311	0.73	0.483	-2.07	23.2	48	0.163	0.668	0.622	-1.61	23.2	37.3
ENSG00000161960	EIF4A1	0.381	0.870218	0.815	-1.23	634.33	777.94	0.031	0.73	0.605	-1.65	470	778	0.2	0.697	0.742	-1.35	470	634
ENSG00000178935	ZNF552	0.374	0.870218	0.691	-1.45	46.07	66.62	0.031	0.73	0.407	-2.46	27.1	66.6	0.206	0.703	0.588	-1.7	27.1	46.1
ENSG00000105887	MTPN	0.363	0.866069	0.797	-1.26	385.26	483.67	0.0302	0.73	0.582	-1.72	281	484	0.209	0.709	0.73	-1.37	281	385
ENSG00000170345	FOS	0.329	0.8479	0.582	-1.72	162.42	279.21	0.032	0.73	0.304	-3.29	84.8	279	0.243	0.735	0.522	-1.92	84.8	162
ENSG00000112486	CCR6	0.311	0.839749	1.3	1.3	89.17	68.78	0.0307	0.73	1.74	1.74	119	68.8	0.254	0.744	1.34	1.34	119	89.2
ENSG00000118246	FASTKD2	0.299	0.833596	0.765	-1.31	59.22	77.44	0.0306	0.73	0.571	-1.75	44.2	77.4	0.264	0.749	0.747	-1.34	44.2	59.2
ENSG00000131375	CAPN7	0.235	0.797886	1.27	1.27	162.07	127.27	0.0292	0.73	1.56	1.56	198	127	0.324	0.772	1.22	1.22	198	162
ENSG00000137055	PLAA	0.00259	0.241861	1.96	1.96	36.85	18.79	0.0313	0.73	1.62	1.62	30.5	18.8	0.386	0.799	0.827	-1.21	30.5	36.9
ENSG00000163946	TASOR	0.19	0.776197	1.25	1.25	274.28	218.96	0.0303	0.73	1.45	1.45	317	219	0.395	0.806	1.16	1.16	317	274
ENSG00000112249	ASCC3	0.0719	0.606914	1.6	1.6	106.45	66.51	0.0307	0.73	1.76	1.76	117	66.5	0.721	0.933	1.1	1.1	117	106
ENSG00000089248	ERP29	0.0138	0.398599	0.597	-1.67	370.43	620.36	0.0319	0.73	0.638	-1.57	396	620	0.75	0.938	1.07	1.07	396	370
ENSG00000198900	TOP1	0.0505	0.563553	1.39	1.39	367.21	263.6	0.0304	0.73	1.44	1.44	380	264	0.837	0.959	1.04	1.04	380	367
ENSG00000121966	CXCR4	0.0345	0.511089	0.572	-1.75	640.2	1120	0.0296	0.73	0.562	-1.78	630	1120	0.951	0.987	0.984	-1.02	630	640
ENSG00000243859	RPL5P17	0.035	0.514352	0.529	-1.89	93.28	176.2	0.0299	0.73	0.52	-1.92	91.6	176	0.952	0.987	0.982	-1.02	91.6	93.3
ENSG00000124155	PIGT	0.949	0.991442	1.02	1.02	119.43	117.62	0.0325	0.732	0.596	-1.68	70	118	0.0282	0.514	0.587	-1.71	70	119
ENSG00000162384	CZIB	0.333	0.8479	0.761	-1.31	36.5	47.99	0.0325	0.732	0.544	-1.84	26.1	48	0.245	0.736	0.715	-1.4	26.1	36.5
ENSG00000173818	ENDOV	0.114	0.699162	0.592	-1.69	17.89	30.21	0.0323	0.732	0.49	-2.04	14.8	30.2	0.58	0.893	0.828	-1.21	14.8	17.9
ENSG00000115944	COX7A2L	0.44	0.889724	1.26	1.26	137.56	109.23	0.0334	0.735	0.527	-1.9	57.6	109	0.00384	0.354	0.419	-2.39	57.6	138
ENSG00000196455	PIK3R4	0.949	0.991442	1.02	1.02	74.21	72.56	0.0334	0.735	0.474	-2.11	34.4	72.6	0.0288	0.514	0.464	-2.16	34.4	74.2
ENSG00000242485	MRPL20	0.469	0.895559	0.856	-1.17	110.13	128.72	0.0329	0.735	0.631	-1.58	81.2	129	0.161	0.668	0.738	-1.36	81.2	110
ENSG00000162783	IER5	0.472	0.89711	0.845	-1.18	205.74	243.61	0.0335	0.735	0.606	-1.65	148	244	0.16	0.668	0.718	-1.39	148	206
ENSG00000101972	STAG2	0.119	0.700462	1.21	1.21	433.72	357.9	0.0334	0.735	1.3	1.3	465	358	0.575	0.891	1.07	1.07	465	434
ENSG00000100522	GNPNAT1	0.0115	0.382909	2.36	2.36	32.43	13.71	0.0335	0.735	2.06	2.06	28.3	13.7	0.683	0.917	0.872	-1.15	28.3	32.4
ENSG00000178607	ERN1	0.0156	0.40863	0.525	-1.9	162.24	309	0.0328	0.735	0.567	-1.76	175	309	0.775	0.944	1.08	1.08	175	162
ENSG00000065427	KARS1	0.0894	0.648315	1.34	1.34	280.78	209.28	0.0371	0.741	0.695	-1.44	146	209	0.000163	0.163	0.518	-1.93	146	281
ENSG00000272822	---	0.493	0.905912	1.33	1.33	40.22	30.33	0.0361	0.741	0.413	-2.42	12.5	30.3	0.0057	0.379	0.312	-3.21	12.5	40.2
ENSG00000203791	EEF1AKMT2	0.585	0.926027	1.13	1.13	85.49	75.65	0.037	0.741	0.624	-1.6	47.2	75.6	0.00888	0.414	0.552	-1.81	47.2	85.5
ENSG00000272742	---	0.656	0.940266	1.48	1.48	129.42	87.68	0.0378	0.741	0.161	-6.23	14.1	87.7	0.0117	0.445	0.109	-9.19	14.1	129
ENSG00000211460	TSN	0.749	0.96174	1.06	1.06	118.21	111.12	0.038	0.741	0.668	-1.5	74.2	111	0.0172	0.483	0.628	-1.59	74.2	118
ENSG00000099992	TBC1D10A	0.777	0.970514	1.1	1.1	37.18	33.77	0.0382	0.741	0.488	-2.05	16.5	33.8	0.0192	0.483	0.443	-2.26	16.5	37.2
ENSG00000163606	CD200R1	0.818	0.973928	1.08	1.08	35	32.39	0.0355	0.741	0.484	-2.06	15.7	32.4	0.0205	0.486	0.448	-2.23	15.7	35
ENSG00000144455	SUMF1	0.991	0.997471	1	1	30.8	30.71	0.0375	0.741	0.564	-1.77	17.3	30.7	0.0382	0.516	0.563	-1.78	17.3	30.8
ENSG00000115464	USP34	0.918	0.987171	1.02	1.02	324.55	318.69	0.036	0.741	1.45	1.45	462	319	0.0467	0.537	1.42	1.42	462	325
ENSG00000043093	DCUN1D1	5.9e-05	0.0270256	2.17	2.17	108.39	50	0.0372	0.741	1.5	1.5	74.9	50	0.0531	0.558	0.691	-1.45	74.9	108
ENSG00000239223	RPL34P31	0.742	0.96174	0.905	-1.11	644.75	712.49	0.0352	0.741	0.527	-1.9	375	712	0.0757	0.587	0.582	-1.72	375	645
ENSG00000139842	CUL4A	0.822	0.974663	0.959	-1.04	143.46	149.61	0.0381	0.741	0.678	-1.47	101	150	0.0658	0.587	0.707	-1.41	101	143
ENSG00000132824	SERINC3	0.592	0.927007	1.13	1.13	193.24	170.42	0.0351	0.741	1.64	1.64	279	170	0.117	0.628	1.44	1.44	279	193
ENSG00000205220	PSMB10	0.542	0.916831	0.837	-1.2	55.19	65.97	0.0343	0.741	0.536	-1.86	35.4	66	0.134	0.651	0.641	-1.56	35.4	55.2
ENSG00000091039	OSBPL8	0.512	0.90933	1.15	1.15	259.86	226.17	0.0357	0.741	1.56	1.56	353	226	0.149	0.664	1.36	1.36	353	260
ENSG00000213051	RPL5P5	0.00059	0.12325	0.284	-3.53	38	134.01	0.0365	0.741	0.467	-2.14	62.6	134	0.175	0.68	1.65	1.65	62.6	38
ENSG00000140931	CMTM3	0.46	0.893222	0.799	-1.25	117.75	147.33	0.0367	0.741	0.53	-1.89	78	147	0.178	0.683	0.663	-1.51	78	118
ENSG00000125447	GGA3	0.379	0.870218	0.824	-1.21	69.87	84.77	0.0346	0.741	0.628	-1.59	53.2	84.8	0.221	0.718	0.761	-1.31	53.2	69.9
ENSG00000223361	FTH1P10	0.367	0.86742	1.22	1.22	58.31	47.95	0.0342	0.741	1.58	1.58	75.6	48	0.229	0.72	1.3	1.3	75.6	58.3
ENSG00000124766	SOX4	0.372	0.870218	0.709	-1.41	145.19	204.7	0.0375	0.741	0.448	-2.23	91.8	205	0.235	0.726	0.632	-1.58	91.8	145
ENSG00000109180	OCIAD1	0.339	0.851731	0.792	-1.26	258.82	326.67	0.0359	0.741	0.599	-1.67	196	327	0.254	0.745	0.757	-1.32	196	259
ENSG00000040341	STAU2	0.311	0.839749	1.27	1.27	156.42	122.74	0.0357	0.741	1.65	1.65	203	123	0.279	0.755	1.29	1.29	203	156
ENSG00000185697	MYBL1	0.299	0.833596	1.31	1.31	65.44	49.95	0.0359	0.741	1.72	1.72	85.9	50	0.293	0.76	1.31	1.31	85.9	65.4
ENSG00000117500	TMED5	0.288	0.826928	1.23	1.23	79.17	64.12	0.0355	0.741	1.51	1.51	97	64.1	0.303	0.762	1.23	1.23	97	79.2
ENSG00000076928	ARHGEF1	0.267	0.815173	0.68	-1.47	256.36	376.98	0.0366	0.741	0.484	-2.07	182	377	0.327	0.772	0.711	-1.41	182	256
ENSG00000139719	VPS33A	0.236	0.797886	0.761	-1.31	90.03	118.27	0.038	0.741	0.619	-1.61	73.3	118	0.376	0.794	0.814	-1.23	73.3	90
ENSG00000105750	ZNF85	0.217	0.795623	1.66	1.66	6.84	4.11	0.0377	0.741	2.31	2.31	9.49	4.11	0.406	0.814	1.39	1.39	9.49	6.84
ENSG00000125037	EMC3	0.201	0.787671	0.749	-1.34	48.49	64.76	0.036	0.741	0.621	-1.61	40.2	64.8	0.418	0.821	0.83	-1.2	40.2	48.5
ENSG00000103187	COTL1	0.195	0.779002	0.689	-1.45	200.19	290.62	0.036	0.741	0.547	-1.83	159	291	0.425	0.825	0.794	-1.26	159	200
ENSG00000008513	ST3GAL1	0.15	0.738335	0.702	-1.42	147.53	210.15	0.0365	0.741	0.598	-1.67	126	210	0.517	0.872	0.852	-1.17	126	148
ENSG00000281103	TRG-AS1	0.00623	0.333464	1.96	1.96	76.95	39.27	0.0341	0.741	1.68	1.68	66.1	39.3	0.535	0.874	0.86	-1.16	66.1	77
ENSG00000090857	PDPR	0.0753	0.616223	0.545	-1.84	162.95	299.05	0.0373	0.741	0.491	-2.04	147	299	0.762	0.94	0.902	-1.11	147	163
ENSG00000110934	BIN2	0.0546	0.577523	0.676	-1.48	220.2	325.6	0.0366	0.741	0.654	-1.53	213	326	0.868	0.967	0.967	-1.03	213	220
ENSG00000214753	HNRNPUL2	0.028	0.476078	0.601	-1.66	165.38	275.21	0.0351	0.741	0.614	-1.63	169	275	0.925	0.983	1.02	1.02	169	165
ENSG00000140987	ZSCAN32	0.0315	0.498495	1.97	1.97	29.51	14.98	0.0369	0.741	1.93	1.93	28.9	15	0.944	0.984	0.978	-1.02	28.9	29.5
ENSG00000232573	RPL3P4	0.000454	0.102118	0.489	-2.05	748.92	1532.98	0.0386	0.745	0.656	-1.53	1010	1530	0.15	0.664	1.34	1.34	1010	749
ENSG00000138231	DBR1	0.844	0.975402	1.05	1.05	98.23	93.82	0.0392	0.747	0.616	-1.62	57.8	93.8	0.0245	0.494	0.588	-1.7	57.8	98.2
ENSG00000102189	EEA1	0.99	0.996765	1	1	98.6	98.35	0.0396	0.747	1.49	1.49	147	98.3	0.0421	0.529	1.49	1.49	147	98.6
ENSG00000130349	MTRES1	0.938	0.989078	0.98	-1.02	48.69	49.69	0.0397	0.747	0.578	-1.73	28.7	49.7	0.0493	0.541	0.59	-1.69	28.7	48.7
ENSG00000173064	HECTD4	0.329	0.8479	0.794	-1.26	70.7	89.07	0.039	0.747	0.613	-1.63	54.6	89.1	0.28	0.756	0.772	-1.3	54.6	70.7
ENSG00000198026	ZNF335	0.113	0.694875	0.662	-1.51	74.58	112.7	0.0397	0.747	0.585	-1.71	65.9	113	0.639	0.906	0.884	-1.13	65.9	74.6
ENSG00000198945	L3MBTL3	0.0199	0.448139	1.99	1.99	103.29	51.88	0.0393	0.747	1.84	1.84	95.4	51.9	0.788	0.945	0.924	-1.08	95.4	103
ENSG00000148297	MED22	0.0264	0.47495	0.462	-2.17	14.76	31.96	0.0396	0.747	0.491	-2.04	15.7	32	0.863	0.966	1.06	1.06	15.7	14.8
ENSG00000072210	ALDH3A2	0.0449	0.540805	1.74	1.74	56.1	32.29	0.0389	0.747	1.76	1.76	56.9	32.3	0.957	0.989	1.01	1.01	56.9	56.1
ENSG00000168395	ING5	0.622	0.935905	0.884	-1.13	117.9	133.39	0.0405	0.748	0.598	-1.67	79.7	133	0.121	0.632	0.676	-1.48	79.7	118
ENSG00000184465	WDR27	0.543	0.916831	1.23	1.23	26.07	21.16	0.0404	0.748	2	2	42.3	21.2	0.153	0.664	1.62	1.62	42.3	26.1
ENSG00000121964	GTDC1	0.532	0.91573	0.86	-1.16	35.72	41.55	0.0401	0.748	0.605	-1.65	25.1	41.6	0.157	0.668	0.704	-1.42	25.1	35.7
ENSG00000025770	NCAPH2	0.501	0.905981	0.787	-1.27	31.92	40.57	0.0407	0.748	0.479	-2.09	19.4	40.6	0.171	0.68	0.609	-1.64	19.4	31.9
ENSG00000231607	DLEU2	0.272	0.819426	1.43	1.43	56.62	39.6	0.0406	0.748	1.94	1.94	76.9	39.6	0.345	0.78	1.36	1.36	76.9	56.6
ENSG00000122965	RBM19	0.203	0.790698	1.49	1.49	27.54	18.46	0.0401	0.748	1.89	1.89	35	18.5	0.442	0.835	1.27	1.27	35	27.5
ENSG00000289100	---	0.156	0.744467	0.78	-1.28	300.24	384.93	0.0406	0.748	0.698	-1.43	269	385	0.531	0.873	0.896	-1.12	269	300
ENSG00000198712	MT-CO2	0.00519	0.316478	0.427	-2.34	5852.18	13689.5	0.041	0.752	0.537	-1.86	7350	13700	0.452	0.84	1.26	1.26	7350	5850
ENSG00000145868	FBXO38	0.649	0.939416	1.12	1.12	78.53	70.1	0.0422	0.753	0.598	-1.67	41.9	70.1	0.0134	0.454	0.534	-1.87	41.9	78.5
ENSG00000143314	MRPL24	0.943	0.989966	1.02	1.02	56.47	55.54	0.0426	0.753	0.619	-1.62	34.4	55.5	0.0372	0.516	0.609	-1.64	34.4	56.5
ENSG00000096746	HNRNPH3	0.748	0.96174	0.912	-1.1	467.39	512.4	0.0424	0.753	0.559	-1.79	286	512	0.0878	0.608	0.613	-1.63	286	467
ENSG00000047410	TPR	0.701	0.953888	1.09	1.09	654.36	601.14	0.0418	0.753	1.57	1.57	942	601	0.0989	0.619	1.44	1.44	942	654
ENSG00000143437	ARNT	0.666	0.944976	0.926	-1.08	90.73	98.01	0.0413	0.753	0.693	-1.44	67.9	98	0.11	0.623	0.748	-1.34	67.9	90.7
ENSG00000117298	ECE1	0.617	0.93533	0.888	-1.13	110.65	124.63	0.0424	0.753	0.616	-1.62	76.8	125	0.128	0.643	0.694	-1.44	76.8	111
ENSG00000100092	SH3BP1	0.567	0.918908	0.819	-1.22	36.67	44.8	0.0424	0.753	0.489	-2.05	21.9	44.8	0.147	0.663	0.597	-1.67	21.9	36.7
ENSG00000266094	RASSF5	0.534	0.916831	0.838	-1.19	792.14	945	0.0424	0.753	0.562	-1.78	531	945	0.16	0.668	0.671	-1.49	531	792
ENSG00000108669	CYTH1	0.48	0.903561	0.817	-1.22	548.57	671.37	0.0416	0.753	0.558	-1.79	375	671	0.183	0.69	0.683	-1.46	375	549
ENSG00000180448	ARHGAP45	0.00518	0.316478	0.489	-2.05	282.32	577.87	0.0425	0.753	0.595	-1.68	344	578	0.442	0.835	1.22	1.22	344	282
ENSG00000168591	TMUB2	0.128	0.713909	0.687	-1.46	52.75	76.82	0.0426	0.753	0.606	-1.65	46.6	76.8	0.618	0.902	0.883	-1.13	46.6	52.7
ENSG00000071626	DAZAP1	0.0539	0.577523	0.684	-1.46	176.17	257.55	0.0413	0.753	0.669	-1.49	172	258	0.913	0.98	0.978	-1.02	172	176
ENSG00000140365	COMMD4	0.195	0.779002	0.641	-1.56	14.25	22.24	0.0428	0.754	0.496	-2.02	11	22.2	0.47	0.848	0.774	-1.29	11	14.3
ENSG00000152117	SMPD4BP	0.693	0.951912	1.14	1.14	178.48	155.9	0.0429	0.755	0.498	-2.01	77.7	156	0.0157	0.472	0.435	-2.3	77.7	178
ENSG00000183283	DAZAP2	0.789	0.971146	1.06	1.06	916.8	867.99	0.0433	0.755	0.661	-1.51	574	868	0.0222	0.486	0.626	-1.6	574	917
ENSG00000126705	AHDC1	0.644	0.937734	0.888	-1.13	82.65	93.03	0.0434	0.755	0.595	-1.68	55.4	93	0.121	0.632	0.67	-1.49	55.4	82.7
ENSG00000054654	SYNE2	0.363	0.866069	1.32	1.32	1585.99	1202.18	0.0435	0.755	1.85	1.85	2220	1200	0.267	0.749	1.4	1.4	2220	1590
ENSG00000204568	MRPS18B	0.0768	0.620953	0.636	-1.57	113.31	178.3	0.0432	0.755	0.596	-1.68	106	178	0.803	0.951	0.938	-1.07	106	113
ENSG00000164830	OXR1	0.244	0.800831	1.3	1.3	104.02	79.93	0.0437	0.757	1.57	1.57	126	79.9	0.398	0.808	1.21	1.21	126	104
ENSG00000111879	FAM184A	0.637	0.935905	0.882	-1.13	54.05	61.3	0.0444	0.759	1.7	1.7	104	61.3	0.0136	0.454	1.93	1.93	104	54.1
ENSG00000204681	GABBR1	0.452	0.892157	0.818	-1.22	68.69	84	0.0443	0.759	0.582	-1.72	48.9	84	0.21	0.71	0.712	-1.4	48.9	68.7
ENSG00000181222	POLR2A	0.42	0.881684	0.848	-1.18	237.79	280.56	0.0442	0.759	0.662	-1.51	186	281	0.229	0.721	0.781	-1.28	186	238
ENSG00000161010	MRNIP	0.00703	0.337206	0.448	-2.23	56.79	126.86	0.0444	0.759	0.551	-1.82	69.9	127	0.49	0.855	1.23	1.23	69.9	56.8
ENSG00000182400	TRAPPC6B	0.151	0.739676	1.41	1.41	41.76	29.52	0.0446	0.762	1.62	1.62	47.8	29.5	0.575	0.891	1.14	1.14	47.8	41.8
ENSG00000104859	CLASRP	0.0775	0.620953	0.674	-1.48	45.85	67.98	0.0449	0.764	0.64	-1.56	43.5	68	0.817	0.955	0.949	-1.05	43.5	45.9
ENSG00000197858	GPAA1	0.419	0.881684	0.776	-1.29	31.5	40.59	0.0451	0.765	0.531	-1.88	21.5	40.6	0.235	0.725	0.684	-1.46	21.5	31.5
ENSG00000124535	WRNIP1	0.361	0.865732	1.34	1.34	135.2	100.57	0.0489	0.766	0.526	-1.9	52.9	101	0.00404	0.356	0.391	-2.56	52.9	135
ENSG00000120709	FAM53C	0.362	0.865998	1.24	1.24	70.21	56.53	0.0494	0.766	0.622	-1.61	35.2	56.5	0.00428	0.356	0.501	-2	35.2	70.2
ENSG00000163818	LZTFL1	0.385	0.872405	1.34	1.34	47.29	35.17	0.0487	0.766	0.503	-1.99	17.7	35.2	0.0048	0.375	0.374	-2.67	17.7	47.3
ENSG00000112081	SRSF3	0.61	0.933462	1.12	1.12	930.99	831.01	0.0471	0.766	0.642	-1.56	534	831	0.0126	0.449	0.573	-1.74	534	931
ENSG00000071859	FAM50A	0.62	0.935617	1.16	1.16	49.3	42.44	0.0473	0.766	0.544	-1.84	23.1	42.4	0.0137	0.454	0.468	-2.13	23.1	49.3
ENSG00000079332	SAR1A	0.635	0.935905	1.09	1.09	107.08	98.2	0.0467	0.766	0.693	-1.44	68.1	98.2	0.0144	0.463	0.636	-1.57	68.1	107
ENSG00000100911	PSME2	0.725	0.960912	1.1	1.1	70.74	64.39	0.0455	0.766	0.583	-1.72	37.5	64.4	0.0193	0.483	0.53	-1.89	37.5	70.7
ENSG00000165121	---	0.976	0.99527	0.99	-1.01	20.75	20.95	0.0476	0.766	1.87	1.87	39.2	20.9	0.0466	0.537	1.89	1.89	39.2	20.7
ENSG00000271601	LIX1L	0.989	0.996765	0.995	-1	90.02	90.46	0.0493	0.766	0.509	-1.96	46	90.5	0.0515	0.549	0.512	-1.95	46	90
ENSG00000175087	PDIK1L	0.000101	0.03463	3.16	3.16	39.31	12.45	0.0478	0.766	1.81	1.81	22.5	12.4	0.0546	0.558	0.573	-1.75	22.5	39.3
ENSG00000254838	GVINP1	0.879	0.980973	1.04	1.04	147.05	141.85	0.0477	0.766	1.59	1.59	226	142	0.0685	0.587	1.54	1.54	226	147
ENSG00000247828	TMEM161B-DT	0.807	0.972225	1.06	1.06	130.06	122.87	0.0453	0.766	1.59	1.59	195	123	0.0799	0.592	1.5	1.5	195	130
ENSG00000275023	MLLT6	0.645	0.938287	0.845	-1.18	927.49	1098.17	0.0457	0.766	0.48	-2.08	527	1100	0.124	0.634	0.568	-1.76	527	927
[truncated: 5,496 more rows]
