# Supplementary material for: Altered phenotype and gene expression of regulatory T cells (Tregs) in children with Autism, and the relationship with comorbid gastrointestinal symptoms
Source: J Neuroinflammation. 2026 Feb 17;23:97. doi: 10.1186/s12974-026-03701-w (PMC13014816; doi:10.1186/s12974-026-03701-w)
Supplement: Supplementary file 2 — Supplementary Material 2. [file 12974_2026_3701_MOESM2_ESM.xlsx]

## Sheet: Upregulated Enrichment Results
GroupID	Category	Term	Description	LogP	Log(q-value)	Genes	Symbols	InTerm_InList
1_Summary	GO Biological Processes	GO:0006974	DNA damage response	-7.8641	-3.97038	86,571,836,1647,2072,2332,2966,3428,5591,6498,9126,9874,10075,10111,10725,10973,22976,23049,55602,64859,79677,133746,3070,3329,5000,7013,10926,23304,2145,23219,23291,55791,57122,4216,54464,23272,55196,4976,5062,10565,79598,6683,23141,8743,57606	ACTL6A,BACH1,CASP3,GADD45A,ERCC4,FMR1,GTF2H2,IFI16,PRKDC,SKIL,SMC3,TLK1,HUWE1,RAD50,NFAT5,ASCC3,PAXIP1,SMG1,CDKN2AIP,NABP1,SMC6,JMY,HELLS,HSPD1,ORC4,TERF1,DBF4,UBR2,EZH1,FBXO28,FBXW11,LRIF1,NUP107,MAP3K4,XRN1,TASOR,RESF1,OPA1,PAK2,ARFGEF1,CEP97,SPAST,ANKLE2,TNFSF10,SLAIN2	45/-
1_Member	GO Biological Processes	GO:0006974	DNA damage response	-7.8641	-3.97038	86,571,836,1647,2072,2332,2966,3428,5591,6498,9126,9874,10075,10111,10725,10973,22976,23049,55602,64859,79677,133746	ACTL6A,BACH1,CASP3,GADD45A,ERCC4,FMR1,GTF2H2,IFI16,PRKDC,SKIL,SMC3,TLK1,HUWE1,RAD50,NFAT5,ASCC3,PAXIP1,SMG1,CDKN2AIP,NABP1,SMC6,JMY	22/761
1_Member	GO Biological Processes	GO:0006259	DNA metabolic process	-7.81349	-3.97038	86,571,1647,2072,2332,2966,3070,3329,5000,5591,7013,9126,10075,10111,10926,10973,22976,23049,23304,64859,79677,133746	ACTL6A,BACH1,GADD45A,ERCC4,FMR1,GTF2H2,HELLS,HSPD1,ORC4,PRKDC,TERF1,SMC3,HUWE1,RAD50,DBF4,ASCC3,PAXIP1,SMG1,UBR2,NABP1,SMC6,JMY	22/766
1_Member	GO Cellular Components	GO:0098687	chromosomal region	-7.73156	-3.97038	86,2072,2145,2332,3070,5000,5591,7013,9126,10111,23219,23291,55791,57122,64859,79677	ACTL6A,ERCC4,EZH1,FMR1,HELLS,ORC4,PRKDC,TERF1,SMC3,RAD50,FBXO28,FBXW11,LRIF1,NUP107,NABP1,SMC6	16/401
1_Member	GO Biological Processes	GO:0006281	DNA repair	-6.33615	-2.69991	86,571,1647,2072,2332,2966,5591,9126,10075,10111,10973,22976,23049,64859,79677,133746	ACTL6A,BACH1,GADD45A,ERCC4,FMR1,GTF2H2,PRKDC,SMC3,HUWE1,RAD50,ASCC3,PAXIP1,SMG1,NABP1,SMC6,JMY	16/508
1_Member	GO Biological Processes	GO:0032204	regulation of telomere maintenance	-6.23072	-2.6914	86,2072,4216,7013,10111,23049,54464,79677	ACTL6A,ERCC4,MAP3K4,TERF1,RAD50,SMG1,XRN1,SMC6	8/104
1_Member	GO Biological Processes	GO:0033044	regulation of chromosome organization	-5.97932	-2.51917	86,2072,2966,4216,7013,10111,23049,23272,54464,55196,79677	ACTL6A,ERCC4,GTF2H2,MAP3K4,TERF1,RAD50,SMG1,TASOR,XRN1,RESF1,SMC6	11/245
1_Member	GO Cellular Components	GO:0000781	chromosome, telomeric region	-5.53072	-2.19551	2072,2145,5000,5591,7013,10111,55791,64859,79677	ERCC4,EZH1,ORC4,PRKDC,TERF1,RAD50,LRIF1,NABP1,SMC6	9/172
1_Member	GO Biological Processes	GO:2001252	positive regulation of chromosome organization	-4.99717	-1.75887	86,2966,4216,7013,10111,23272,55196	ACTL6A,GTF2H2,MAP3K4,TERF1,RAD50,TASOR,RESF1	7/109
1_Member	GO Biological Processes	GO:0032200	telomere organization	-4.4997	-1.49185	86,2072,2145,5591,7013,10111,79677	ACTL6A,ERCC4,EZH1,PRKDC,TERF1,RAD50,SMC6	7/130
1_Member	GO Biological Processes	GO:0006310	DNA recombination	-4.30493	-1.40905	86,2072,3329,5591,10111,22976,23304,64859,79677	ACTL6A,ERCC4,HSPD1,PRKDC,RAD50,PAXIP1,UBR2,NABP1,SMC6	9/245
1_Member	GO Biological Processes	GO:0000723	telomere maintenance	-4.26509	-1.38989	86,2072,5591,7013,10111,79677	ACTL6A,ERCC4,PRKDC,TERF1,RAD50,SMC6	6/97
1_Member	GO Biological Processes	GO:0000722	telomere maintenance via recombination	-4.07422	-1.34107	2072,10111,79677	ERCC4,RAD50,SMC6	3/13
1_Member	GO Biological Processes	GO:0032205	negative regulation of telomere maintenance	-4.03534	-1.31556	2072,7013,10111,54464	ERCC4,TERF1,RAD50,XRN1	4/35
1_Member	GO Biological Processes	GO:0016233	telomere capping	-3.78894	-1.14171	5591,7013,10111	PRKDC,TERF1,RAD50	3/16
1_Member	GO Biological Processes	GO:0051052	regulation of DNA metabolic process	-3.56933	-0.954281	86,2072,4216,5591,7013,9126,10111,10926,22976,23049,54464,79677	ACTL6A,ERCC4,MAP3K4,PRKDC,TERF1,SMC3,RAD50,DBF4,PAXIP1,SMG1,XRN1,SMC6	12/524
1_Member	GO Biological Processes	GO:0006312	mitotic recombination	-3.55734	-0.952513	2072,10111,79677	ERCC4,RAD50,SMC6	3/19
1_Member	GO Biological Processes	GO:0010639	negative regulation of organelle organization	-3.22733	-0.759881	2072,4976,5062,7013,10075,10111,10565,54464,79598	ERCC4,OPA1,PAK2,TERF1,HUWE1,RAD50,ARFGEF1,XRN1,CEP97	9/342
1_Member	GO Biological Processes	GO:0048285	organelle fission	-3.2093	-0.756103	2072,4976,5000,6683,7013,9126,10111,23141,23304	ERCC4,OPA1,ORC4,SPAST,TERF1,SMC3,RAD50,ANKLE2,UBR2	9/344
1_Member	GO Biological Processes	GO:1904353	regulation of telomere capping	-3.14392	-0.725166	2072,4216,10111	ERCC4,MAP3K4,RAD50	3/26
1_Member	GO Biological Processes	GO:1904356	regulation of telomere maintenance via telomere lengthening	-3.09666	-0.701741	2072,4216,7013,54464	ERCC4,MAP3K4,TERF1,XRN1	4/61
1_Member	GO Biological Processes	GO:1904357	negative regulation of telomere maintenance via telomere lengthening	-3.09494	-0.701741	2072,7013,54464	ERCC4,TERF1,XRN1	3/27
1_Member	GO Biological Processes	GO:0032206	positive regulation of telomere maintenance	-2.87254	-0.544806	86,4216,7013,10111	ACTL6A,MAP3K4,TERF1,RAD50	4/70
1_Member	GO Biological Processes	GO:0000280	nuclear division	-2.80215	-0.493274	2072,5000,6683,7013,9126,10111,23141,23304	ERCC4,ORC4,SPAST,TERF1,SMC3,RAD50,ANKLE2,UBR2	8/318
1_Member	GO Biological Processes	GO:2001251	negative regulation of chromosome organization	-2.74039	-0.466745	2072,7013,10111,54464	ERCC4,TERF1,RAD50,XRN1	4/76
1_Member	GO Biological Processes	GO:0051276	chromosome organization	-2.72277	-0.466745	86,2072,2145,5591,7013,9126,10111,10973,57122,79677	ACTL6A,ERCC4,EZH1,PRKDC,TERF1,SMC3,RAD50,ASCC3,NUP107,SMC6	10/485
1_Member	GO Biological Processes	GO:0010638	positive regulation of organelle organization	-2.61465	-0.405734	86,2966,4216,6683,7013,8743,10111,23272,55196,57606	ACTL6A,GTF2H2,MAP3K4,SPAST,TERF1,TNFSF10,RAD50,TASOR,RESF1,SLAIN2	10/502
1_Member	GO Biological Processes	GO:0051054	positive regulation of DNA metabolic process	-2.35932	-0.222273	86,4216,5591,7013,10111,10926,22976	ACTL6A,MAP3K4,PRKDC,TERF1,RAD50,DBF4,PAXIP1	7/297
1_Member	GO Biological Processes	GO:0032210	regulation of telomere maintenance via telomerase	-2.2476	-0.16477	4216,7013,54464	MAP3K4,TERF1,XRN1	3/53
1_Member	GO Biological Processes	GO:0140013	meiotic nuclear division	-2.1934	-0.128285	2072,5000,7013,10111,23304	ERCC4,ORC4,TERF1,RAD50,UBR2	5/171
1_Member	GO Biological Processes	GO:0007131	reciprocal meiotic recombination	-2.13872	-0.100624	2072,10111,23304	ERCC4,RAD50,UBR2	3/58
1_Member	GO Biological Processes	GO:0140527	reciprocal homologous recombination	-2.13872	-0.100624	2072,10111,23304	ERCC4,RAD50,UBR2	3/58
1_Member	GO Biological Processes	GO:0051321	meiotic cell cycle	-2.09433	-0.0864812	2072,5000,7013,9126,10111,23304	ERCC4,ORC4,TERF1,SMC3,RAD50,UBR2	6/254
2_Summary	GO Biological Processes	GO:0032446	protein modification by small protein conjugation	-5.69471	-2.30152	373,5903,8916,9318,10075,23219,23291,23304,25897,26224,26263,51132,54165,57178,57534,79677,80204,122809,8027,8878,10973,27248,836,3949	TRIM23,RANBP2,HERC3,COPS2,HUWE1,FBXO28,FBXW11,UBR2,RNF19A,FBXL3,FBXO22,RLIM,DCUN1D1,ZMIZ1,MIB1,SMC6,FBXO11,SOCS4,STAM,SQSTM1,ASCC3,ERLEC1,CASP3,LDLR	24/-
2_Member	GO Biological Processes	GO:0032446	protein modification by small protein conjugation	-5.69471	-2.30152	373,5903,8916,9318,10075,23219,23291,23304,25897,26224,26263,51132,54165,57178,57534,79677,80204,122809	TRIM23,RANBP2,HERC3,COPS2,HUWE1,FBXO28,FBXW11,UBR2,RNF19A,FBXL3,FBXO22,RLIM,DCUN1D1,ZMIZ1,MIB1,SMC6,FBXO11,SOCS4	18/711
2_Member	GO Biological Processes	GO:0006511	ubiquitin-dependent protein catabolic process	-4.74564	-1.60556	8027,8878,8916,10075,10973,23291,23304,25897,26224,26263,27248,51132,57534,80204	STAM,SQSTM1,HERC3,HUWE1,ASCC3,FBXW11,UBR2,RNF19A,FBXL3,FBXO22,ERLEC1,RLIM,MIB1,FBXO11	14/530
2_Member	GO Biological Processes	GO:0019941	modification-dependent protein catabolic process	-4.65633	-1.56417	8027,8878,8916,10075,10973,23291,23304,25897,26224,26263,27248,51132,57534,80204	STAM,SQSTM1,HERC3,HUWE1,ASCC3,FBXW11,UBR2,RNF19A,FBXL3,FBXO22,ERLEC1,RLIM,MIB1,FBXO11	14/540
2_Member	GO Biological Processes	GO:0043632	modification-dependent macromolecule catabolic process	-4.56057	-1.49836	8027,8878,8916,10075,10973,23291,23304,25897,26224,26263,27248,51132,57534,80204	STAM,SQSTM1,HERC3,HUWE1,ASCC3,FBXW11,UBR2,RNF19A,FBXL3,FBXO22,ERLEC1,RLIM,MIB1,FBXO11	14/551
2_Member	GO Biological Processes	GO:0030163	protein catabolic process	-4.50149	-1.49185	836,3949,8027,8878,8916,10075,10973,23291,23304,25897,26224,26263,27248,51132,57534,80204	CASP3,LDLR,STAM,SQSTM1,HERC3,HUWE1,ASCC3,FBXW11,UBR2,RNF19A,FBXL3,FBXO22,ERLEC1,RLIM,MIB1,FBXO11	16/710
2_Member	GO Biological Processes	GO:0051603	proteolysis involved in protein catabolic process	-4.17814	-1.38989	8027,8878,8916,10075,10973,23291,23304,25897,26224,26263,27248,51132,57534,80204	STAM,SQSTM1,HERC3,HUWE1,ASCC3,FBXW11,UBR2,RNF19A,FBXL3,FBXO22,ERLEC1,RLIM,MIB1,FBXO11	14/598
2_Member	GO Biological Processes	GO:0016567	protein ubiquitination	-3.36939	-0.838666	373,8916,10075,23219,23291,23304,25897,26224,26263,51132,57534,80204,122809	TRIM23,HERC3,HUWE1,FBXO28,FBXW11,UBR2,RNF19A,FBXL3,FBXO22,RLIM,MIB1,FBXO11,SOCS4	13/633
3_Summary	GO Biological Processes	GO:0006325	chromatin organization	-5.05814	-1.77409	86,2145,3070,3428,3717,5591,9874,10075,10725,22976,23140,23272,23304,29915,51132,55791,79677,114803	ACTL6A,EZH1,HELLS,IFI16,JAK2,PRKDC,TLK1,HUWE1,NFAT5,PAXIP1,ZZEF1,TASOR,UBR2,HCFC2,RLIM,LRIF1,SMC6,MYSM1	18/-
3_Member	GO Biological Processes	GO:0006325	chromatin organization	-5.05814	-1.77409	86,2145,3070,3428,3717,5591,9874,10075,10725,22976,23140,23272,23304,29915,51132,55791,79677,114803	ACTL6A,EZH1,HELLS,IFI16,JAK2,PRKDC,TLK1,HUWE1,NFAT5,PAXIP1,ZZEF1,TASOR,UBR2,HCFC2,RLIM,LRIF1,SMC6,MYSM1	18/791
3_Member	GO Biological Processes	GO:0045814	negative regulation of gene expression, epigenetic	-4.91975	-1.72285	2145,3070,3428,23272,23304,51132,55791	EZH1,HELLS,IFI16,TASOR,UBR2,RLIM,LRIF1	7/112
3_Member	GO Biological Processes	GO:0006338	chromatin remodeling	-4.37606	-1.45998	86,2145,3070,3428,3717,5591,10075,10725,22976,23272,23304,29915,51132,55791,114803	ACTL6A,EZH1,HELLS,IFI16,JAK2,PRKDC,HUWE1,NFAT5,PAXIP1,TASOR,UBR2,HCFC2,RLIM,LRIF1,MYSM1	15/649
3_Member	GO Biological Processes	GO:0040029	epigenetic regulation of gene expression	-3.83012	-1.16003	2145,3070,3428,23272,23304,51132,55791	EZH1,HELLS,IFI16,TASOR,UBR2,RLIM,LRIF1	7/166
3_Member	GO Biological Processes	GO:0031507	heterochromatin formation	-3.63197	-1.00646	2145,3070,23304,51132,55791	EZH1,HELLS,UBR2,RLIM,LRIF1	5/81
3_Member	GO Biological Processes	GO:0070828	heterochromatin organization	-2.86929	-0.544806	2145,3070,23304,51132,55791	EZH1,HELLS,UBR2,RLIM,LRIF1	5/119
4_Summary	GO Biological Processes	GO:0006366	transcription by RNA polymerase II	-4.72991	-1.60556	2966,3717,4094,5316,6239,8878,9318,9321,10725,22936,27316,94104,571,5451,5591,6498,10973,51132	GTF2H2,JAK2,MAF,PKNOX1,RREB1,SQSTM1,COPS2,TRIP11,NFAT5,ELL2,RBMX,PAXBP1,BACH1,POU2F1,PRKDC,SKIL,ASCC3,RLIM	18/-
4_Member	GO Biological Processes	GO:0006366	transcription by RNA polymerase II	-4.72991	-1.60556	2966,3717,4094,5316,6239,8878,9318,9321,10725,22936,27316,94104	GTF2H2,JAK2,MAF,PKNOX1,RREB1,SQSTM1,COPS2,TRIP11,NFAT5,ELL2,RBMX,PAXBP1	12/395
4_Member	GO Biological Processes	GO:0006351	DNA-templated transcription	-3.48805	-0.902961	2966,3717,4094,5316,6239,8878,9318,9321,10725,22936,27316,94104	GTF2H2,JAK2,MAF,PKNOX1,RREB1,SQSTM1,COPS2,TRIP11,NFAT5,ELL2,RBMX,PAXBP1	12/535
4_Member	GO Biological Processes	GO:0032774	RNA biosynthetic process	-3.39487	-0.855539	2966,3717,4094,5316,6239,8878,9318,9321,10725,22936,27316,94104	GTF2H2,JAK2,MAF,PKNOX1,RREB1,SQSTM1,COPS2,TRIP11,NFAT5,ELL2,RBMX,PAXBP1	12/548
4_Member	GO Cellular Components	GO:0005667	transcription regulator complex	-2.53538	-0.357783	571,2966,4094,5316,5451,5591,6498,10725,10973,51132	BACH1,GTF2H2,MAF,PKNOX1,POU2F1,PRKDC,SKIL,NFAT5,ASCC3,RLIM	10/515
5_Summary	GO Biological Processes	GO:0090161	Golgi ribbon formation	-4.44486	-1.46183	8674,9321,50999,10075,10565,22878,54808,6683,8027,8411,8878,23141	VAMP4,TRIP11,TMED5,HUWE1,ARFGEF1,TRAPPC8,DYM,SPAST,STAM,EEA1,SQSTM1,ANKLE2	12/-
5_Member	GO Biological Processes	GO:0090161	Golgi ribbon formation	-4.44486	-1.46183	8674,9321,50999	VAMP4,TRIP11,TMED5	3/10
5_Member	GO Biological Processes	GO:0007030	Golgi organization	-4.21646	-1.38989	8674,9321,10075,10565,22878,50999,54808	VAMP4,TRIP11,HUWE1,ARFGEF1,TRAPPC8,TMED5,DYM	7/144
5_Member	GO Biological Processes	GO:0010256	endomembrane system organization	-3.34594	-0.831916	6683,8027,8411,8674,8878,9321,10075,10565,22878,23141,50999,54808	SPAST,STAM,EEA1,VAMP4,SQSTM1,TRIP11,HUWE1,ARFGEF1,TRAPPC8,ANKLE2,TMED5,DYM	12/555
6_Summary	GO Cellular Components	GO:1902554	serine/threonine protein kinase complex	-4.39469	-1.45998	2966,5591,9821,9969,10926,29110,203228,373,8878,143686,836,2072,3428,122809,2332,3949,26263,57721,133746	GTF2H2,PRKDC,RB1CC1,MED13,DBF4,TBK1,C9orf72,TRIM23,SQSTM1,SESN3,CASP3,ERCC4,IFI16,SOCS4,FMR1,LDLR,FBXO22,METTL14,JMY	19/-
6_Member	GO Cellular Components	GO:1902554	serine/threonine protein kinase complex	-4.39469	-1.45998	2966,5591,9821,9969,10926,29110,203228	GTF2H2,PRKDC,RB1CC1,MED13,DBF4,TBK1,C9orf72	7/135
6_Member	GO Cellular Components	GO:1902911	protein kinase complex	-4.1229	-1.36173	2966,5591,9821,9969,10926,29110,203228	GTF2H2,PRKDC,RB1CC1,MED13,DBF4,TBK1,C9orf72	7/149
6_Member	GO Biological Processes	GO:0010508	positive regulation of autophagy	-3.23382	-0.759881	373,8878,9821,29110,143686,203228	TRIM23,SQSTM1,RB1CC1,TBK1,SESN3,C9orf72	6/150
6_Member	GO Biological Processes	GO:0010506	regulation of autophagy	-3.11249	-0.705972	373,836,2072,3428,8878,9821,29110,143686,203228	TRIM23,CASP3,ERCC4,IFI16,SQSTM1,RB1CC1,TBK1,SESN3,C9orf72	9/355
6_Member	GO Cellular Components	GO:0061695	transferase complex, transferring phosphorus-containing groups	-2.88955	-0.548881	2966,5591,9821,9969,10926,29110,122809,203228	GTF2H2,PRKDC,RB1CC1,MED13,DBF4,TBK1,SOCS4,C9orf72	8/308
6_Member	GO Biological Processes	GO:0009896	positive regulation of catabolic process	-2.45504	-0.303105	373,2332,3949,8878,9821,26263,29110,57721,122809,143686,203228	TRIM23,FMR1,LDLR,SQSTM1,RB1CC1,FBXO22,TBK1,METTL14,SOCS4,SESN3,C9orf72	11/617
6_Member	GO Biological Processes	GO:0031329	regulation of cellular catabolic process	-2.11761	-0.0915044	373,836,2072,2332,3428,3949,8878,9821,29110,57721,143686,203228	TRIM23,CASP3,ERCC4,FMR1,IFI16,LDLR,SQSTM1,RB1CC1,TBK1,METTL14,SESN3,C9orf72	12/783
6_Member	GO Cellular Components	GO:0005776	autophagosome	-2.04669	-0.0636654	8878,9821,133746,203228	SQSTM1,RB1CC1,JMY,C9orf72	4/119
7_Summary	GO Biological Processes	GO:0031400	negative regulation of protein modification process	-4.39066	-1.45998	104,1647,5062,5591,8878,22876,27250,55074,122809,171392,203228,374969,8725,23141,86,2072,4216,4976,6498,9821,26973,7013,2332,3428,3717,10565,22976	ADARB1,GADD45A,PAK2,PRKDC,SQSTM1,INPP5F,PDCD4,OXR1,SOCS4,ZNF675,C9orf72,SVBP,URI1,ANKLE2,ACTL6A,ERCC4,MAP3K4,OPA1,SKIL,RB1CC1,CHORDC1,TERF1,FMR1,IFI16,JAK2,ARFGEF1,PAXIP1	27/-
7_Member	GO Biological Processes	GO:0031400	negative regulation of protein modification process	-4.39066	-1.45998	104,1647,5062,5591,8878,22876,27250,55074,122809,171392,203228,374969	ADARB1,GADD45A,PAK2,PRKDC,SQSTM1,INPP5F,PDCD4,OXR1,SOCS4,ZNF675,C9orf72,SVBP	12/428
7_Member	GO Biological Processes	GO:0045936	negative regulation of phosphate metabolic process	-4.19233	-1.38989	104,1647,5062,5591,8725,22876,23141,27250,122809,171392,203228	ADARB1,GADD45A,PAK2,PRKDC,URI1,INPP5F,ANKLE2,PDCD4,SOCS4,ZNF675,C9orf72	11/380
7_Member	GO Biological Processes	GO:0010563	negative regulation of phosphorus metabolic process	-4.18216	-1.38989	104,1647,5062,5591,8725,22876,23141,27250,122809,171392,203228	ADARB1,GADD45A,PAK2,PRKDC,URI1,INPP5F,ANKLE2,PDCD4,SOCS4,ZNF675,C9orf72	11/381
7_Member	GO Biological Processes	GO:0042326	negative regulation of phosphorylation	-4.16579	-1.38989	104,1647,5062,5591,22876,23141,27250,122809,171392,203228	ADARB1,GADD45A,PAK2,PRKDC,INPP5F,ANKLE2,PDCD4,SOCS4,ZNF675,C9orf72	10/317
7_Member	GO Biological Processes	GO:0001933	negative regulation of protein phosphorylation	-3.67248	-1.03624	104,1647,5062,5591,22876,27250,122809,171392,203228	ADARB1,GADD45A,PAK2,PRKDC,INPP5F,PDCD4,SOCS4,ZNF675,C9orf72	9/297
7_Member	GO Biological Processes	GO:0080135	regulation of cellular response to stress	-3.19448	-0.750795	86,1647,2072,4216,4976,5591,6498,9821,22876,26973,27250,55074,171392	ACTL6A,GADD45A,ERCC4,MAP3K4,OPA1,PRKDC,SKIL,RB1CC1,INPP5F,CHORDC1,PDCD4,OXR1,ZNF675	13/661
7_Member	GO Biological Processes	GO:0051348	negative regulation of transferase activity	-3.15206	-0.725166	104,1647,5062,7013,27250,122809,171392	ADARB1,GADD45A,PAK2,TERF1,PDCD4,SOCS4,ZNF675	7/215
7_Member	GO Biological Processes	GO:0044092	negative regulation of molecular function	-3.11176	-0.705972	104,1647,2072,2332,3428,3717,5062,7013,8725,10565,22976,27250,122809,171392	ADARB1,GADD45A,ERCC4,FMR1,IFI16,JAK2,PAK2,TERF1,URI1,ARFGEF1,PAXIP1,PDCD4,SOCS4,ZNF675	14/762
7_Member	GO Biological Processes	GO:0006469	negative regulation of protein kinase activity	-2.92489	-0.568104	104,1647,5062,27250,122809,171392	ADARB1,GADD45A,PAK2,PDCD4,SOCS4,ZNF675	6/172
7_Member	GO Biological Processes	GO:0043086	negative regulation of catalytic activity	-2.91991	-0.568104	104,1647,3428,5062,7013,8725,10565,27250,122809,171392	ADARB1,GADD45A,IFI16,PAK2,TERF1,URI1,ARFGEF1,PDCD4,SOCS4,ZNF675	10/456
7_Member	GO Biological Processes	GO:0033673	negative regulation of kinase activity	-2.78767	-0.489783	104,1647,5062,27250,122809,171392	ADARB1,GADD45A,PAK2,PDCD4,SOCS4,ZNF675	6/183
7_Member	GO Biological Processes	GO:0043506	regulation of JUN kinase activity	-2.56365	-0.37488	4216,27250,171392	MAP3K4,PDCD4,ZNF675	3/41
8_Summary	GO Biological Processes	GO:0043392	negative regulation of DNA binding	-4.24727	-1.38989	2072,3428,3717,171392,3329,5062,7013,8725,8743,10565,23380,26037,85440,203228,374969,2332,23291,26263,122809	ERCC4,IFI16,JAK2,ZNF675,HSPD1,PAK2,TERF1,URI1,TNFSF10,ARFGEF1,SRGAP2,SIPA1L1,DOCK7,C9orf72,SVBP,FMR1,FBXW11,FBXO22,SOCS4	19/-
8_Member	GO Biological Processes	GO:0043392	negative regulation of DNA binding	-4.24727	-1.38989	2072,3428,3717,171392	ERCC4,IFI16,JAK2,ZNF675	4/31
8_Member	GO Biological Processes	GO:0051336	regulation of hydrolase activity	-2.68784	-0.444716	3329,3428,3717,5062,7013,8725,8743,10565,23380,26037,85440,203228,374969	HSPD1,IFI16,JAK2,PAK2,TERF1,URI1,TNFSF10,ARFGEF1,SRGAP2,SIPA1L1,DOCK7,C9orf72,SVBP	13/753
8_Member	GO Biological Processes	GO:0051101	regulation of DNA binding	-2.67865	-0.444716	2072,3428,3717,171392	ERCC4,IFI16,JAK2,ZNF675	4/79
8_Member	GO Biological Processes	GO:0045862	positive regulation of proteolysis	-2.64555	-0.42009	2332,3329,3428,3717,8743,23291,26263,122809	FMR1,HSPD1,IFI16,JAK2,TNFSF10,FBXW11,FBXO22,SOCS4	8/337
8_Member	GO Biological Processes	GO:0051100	negative regulation of binding	-2.09779	-0.0864812	2072,3428,3717,171392	ERCC4,IFI16,JAK2,ZNF675	4/115
8_Member	GO Biological Processes	GO:0030162	regulation of proteolysis	-2.07062	-0.077836	2332,3329,3428,3717,5062,8743,23291,26263,122809,374969	FMR1,HSPD1,IFI16,JAK2,PAK2,TNFSF10,FBXW11,FBXO22,SOCS4,SVBP	10/602
8_Member	GO Biological Processes	GO:2000116	regulation of cysteine-type endopeptidase activity	-2.00659	-0.0470463	3329,3428,3717,5062,8743	HSPD1,IFI16,JAK2,PAK2,TNFSF10	5/190
9_Summary	GO Biological Processes	GO:0018193	peptidyl-amino acid modification	-4.10195	-1.35502	3717,5062,5591,5903,9874,23049,23398,29110,57178,79677,120526,147991,340481,4216,9318,22858,22928,23235,79646,124923,149420,3329,3428	JAK2,PAK2,PRKDC,RANBP2,TLK1,SMG1,PPWD1,TBK1,ZMIZ1,SMC6,DNAJC24,DPY19L3,ZDHHC21,MAP3K4,COPS2,CILK1,SEPHS2,SIK2,PANK3,RSKR,PDIK1L,HSPD1,IFI16	23/-
9_Member	GO Biological Processes	GO:0018193	peptidyl-amino acid modification	-4.10195	-1.35502	3717,5062,5591,5903,9874,23049,23398,29110,57178,79677,120526,147991,340481	JAK2,PAK2,PRKDC,RANBP2,TLK1,SMG1,PPWD1,TBK1,ZMIZ1,SMC6,DNAJC24,DPY19L3,ZDHHC21	13/532
9_Member	GO Biological Processes	GO:0016310	phosphorylation	-3.35167	-0.831916	3717,4216,5062,5591,9318,9874,22858,22928,23049,23235,29110,79646,124923,149420	JAK2,MAP3K4,PAK2,PRKDC,COPS2,TLK1,CILK1,SEPHS2,SMG1,SIK2,TBK1,PANK3,RSKR,PDIK1L	14/720
9_Member	GO Biological Processes	GO:0006468	protein phosphorylation	-3.24383	-0.759881	3717,5062,5591,9318,9874,22858,23049,23235,29110,124923,149420	JAK2,PAK2,PRKDC,COPS2,TLK1,CILK1,SMG1,SIK2,TBK1,RSKR,PDIK1L	11/490
9_Member	GO Biological Processes	GO:0018105	peptidyl-serine phosphorylation	-2.29108	-0.179886	5062,5591,9874,23049,29110	PAK2,PRKDC,TLK1,SMG1,TBK1	5/162
9_Member	GO Biological Processes	GO:0002218	activation of innate immune response	-2.2799	-0.176259	3329,3428,5062,5591,29110	HSPD1,IFI16,PAK2,PRKDC,TBK1	5/163
9_Member	GO Biological Processes	GO:0018209	peptidyl-serine modification	-2.15199	-0.100624	5062,5591,9874,23049,29110	PAK2,PRKDC,TLK1,SMG1,TBK1	5/175
10_Summary	GO Biological Processes	GO:0043065	positive regulation of apoptotic process	-3.95819	-1.25137	836,1647,3248,3329,3717,5062,5591,6498,8743,8878,27250,54870,133746,3428,9821,51202	CASP3,GADD45A,HPGD,HSPD1,JAK2,PAK2,PRKDC,SKIL,TNFSF10,SQSTM1,PDCD4,QRICH1,JMY,IFI16,RB1CC1,DDX47	16/-
10_Member	GO Biological Processes	GO:0043065	positive regulation of apoptotic process	-3.95819	-1.25137	836,1647,3248,3329,3717,5062,5591,6498,8743,8878,27250,54870,133746	CASP3,GADD45A,HPGD,HSPD1,JAK2,PAK2,PRKDC,SKIL,TNFSF10,SQSTM1,PDCD4,QRICH1,JMY	13/550
10_Member	GO Biological Processes	GO:0097193	intrinsic apoptotic signaling pathway	-3.89576	-1.21377	836,3428,3717,5591,6498,54870,133746	CASP3,IFI16,JAK2,PRKDC,SKIL,QRICH1,JMY	7/162
10_Member	GO Biological Processes	GO:0043068	positive regulation of programmed cell death	-3.79082	-1.14171	836,1647,3248,3329,3717,5062,5591,6498,8743,8878,27250,54870,133746	CASP3,GADD45A,HPGD,HSPD1,JAK2,PAK2,PRKDC,SKIL,TNFSF10,SQSTM1,PDCD4,QRICH1,JMY	13/572
10_Member	GO Biological Processes	GO:0097190	apoptotic signaling pathway	-3.50497	-0.910125	836,3428,3717,5591,6498,9821,51202,54870,133746	CASP3,IFI16,JAK2,PRKDC,SKIL,RB1CC1,DDX47,QRICH1,JMY	9/313
10_Member	GO Biological Processes	GO:0097191	extrinsic apoptotic signaling pathway	-2.13752	-0.100624	3717,6498,9821,51202	JAK2,SKIL,RB1CC1,DDX47	4/112
11_Summary	KEGG Pathway	hsa05417	Lipid and atherosclerosis	-3.92371	-1.22949	836,3329,3717,3949,5451,8743,29110,57534,29915,57711,162962,162967,171392	CASP3,HSPD1,JAK2,LDLR,POU2F1,TNFSF10,TBK1,MIB1,HCFC2,ZNF529,ZNF836,ZNF320,ZNF675	13/-
11_Member	KEGG Pathway	hsa05417	Lipid and atherosclerosis	-3.92371	-1.22949	836,3329,3717,3949,5451,8743,29110,57534	CASP3,HSPD1,JAK2,LDLR,POU2F1,TNFSF10,TBK1,MIB1	8/215
11_Member	KEGG Pathway	hsa05168	Herpes simplex virus 1 infection	-2.06018	-0.0698548	836,3717,5451,29110,29915,57711,162962,162967,171392	CASP3,JAK2,POU2F1,TBK1,HCFC2,ZNF529,ZNF836,ZNF320,ZNF675	9/512
12_Summary	GO Biological Processes	GO:0010212	response to ionizing radiation	-3.44267	-0.875303	836,1647,3428,5591,22976,64859,2072,2966,4216,26224	CASP3,GADD45A,IFI16,PRKDC,PAXIP1,NABP1,ERCC4,GTF2H2,MAP3K4,FBXL3	10/-
12_Member	GO Biological Processes	GO:0010212	response to ionizing radiation	-3.44267	-0.875303	836,1647,3428,5591,22976,64859	CASP3,GADD45A,IFI16,PRKDC,PAXIP1,NABP1	6/137
12_Member	GO Biological Processes	GO:0009314	response to radiation	-3.18975	-0.750795	836,1647,2072,2966,3428,4216,5591,22976,26224,64859	CASP3,GADD45A,ERCC4,GTF2H2,IFI16,MAP3K4,PRKDC,PAXIP1,FBXL3,NABP1	10/420
13_Summary	GO Cellular Components	GO:0120111	neuron projection cytoplasm	-3.4415	-0.875303	2332,4976,6683,23291,84945	FMR1,OPA1,SPAST,FBXW11,ABHD13	5/-
13_Member	GO Cellular Components	GO:0120111	neuron projection cytoplasm	-3.4415	-0.875303	2332,4976,6683,23291,84945	FMR1,OPA1,SPAST,FBXW11,ABHD13	5/89
13_Member	GO Biological Processes	GO:0098930	axonal transport	-2.07833	-0.0780754	4976,6683,23291	OPA1,SPAST,FBXW11	3/61
13_Member	GO Cellular Components	GO:1904115	axon cytoplasm	-2.02119	-0.0570481	4976,6683,23291	OPA1,SPAST,FBXW11	3/64
14_Summary	KEGG Pathway	hsa00770	Pantothenate and CoA biosynthesis	-3.42417	-0.867112	224,51380,79646,22928,200895	ALDH3A2,CSAD,PANK3,SEPHS2,DHFR2	5/-
14_Member	KEGG Pathway	hsa00770	Pantothenate and CoA biosynthesis	-3.42417	-0.867112	224,51380,79646	ALDH3A2,CSAD,PANK3	3/21
14_Member	GO Biological Processes	GO:0009069	serine family amino acid metabolic process	-2.62618	-0.413191	22928,51380,200895	SEPHS2,CSAD,DHFR2	3/39
15_Summary	GO Cellular Components	GO:0000775	chromosome, centromeric region	-3.39934	-0.855539	86,2332,3070,9126,23219,23291,57122,79677,10565,22976,55791,10111,192669,3621,5000	ACTL6A,FMR1,HELLS,SMC3,FBXO28,FBXW11,NUP107,SMC6,ARFGEF1,PAXIP1,LRIF1,RAD50,AGO3,ING1,ORC4	15/-
15_Member	GO Cellular Components	GO:0000775	chromosome, centromeric region	-3.39934	-0.855539	86,2332,3070,9126,23219,23291,57122,79677	ACTL6A,FMR1,HELLS,SMC3,FBXO28,FBXW11,NUP107,SMC6	8/257
15_Member	GO Cellular Components	GO:0034399	nuclear periphery	-3.23382	-0.759881	86,9126,10565,22976,55791,57122	ACTL6A,SMC3,ARFGEF1,PAXIP1,LRIF1,NUP107	6/150
15_Member	GO Cellular Components	GO:0000793	condensed chromosome	-3.14492	-0.725166	86,9126,10111,23219,23291,57122,79677,192669	ACTL6A,SMC3,RAD50,FBXO28,FBXW11,NUP107,SMC6,AGO3	8/281
15_Member	GO Cellular Components	GO:0000228	nuclear chromosome	-2.92723	-0.568104	86,3621,5000,9126,10111,55791,192669	ACTL6A,ING1,ORC4,SMC3,RAD50,LRIF1,AGO3	7/235
15_Member	GO Cellular Components	GO:0016363	nuclear matrix	-2.72965	-0.466745	86,9126,10565,22976,55791	ACTL6A,SMC3,ARFGEF1,PAXIP1,LRIF1	5/128
16_Summary	GO Cellular Components	GO:0098794	postsynapse	-3.31199	-0.80609	2332,3717,3749,5062,8411,9194,22866,23229,23380,25897,26037,53981,203228,3556	FMR1,JAK2,KCNC4,PAK2,EEA1,SLC16A7,CNKSR2,ARHGEF9,SRGAP2,RNF19A,SIPA1L1,CPSF2,C9orf72,IL1RAP	14/-
16_Member	GO Cellular Components	GO:0098794	postsynapse	-3.31199	-0.80609	2332,3717,3749,5062,8411,9194,22866,23229,23380,25897,26037,53981,203228	FMR1,JAK2,KCNC4,PAK2,EEA1,SLC16A7,CNKSR2,ARHGEF9,SRGAP2,RNF19A,SIPA1L1,CPSF2,C9orf72	13/642
16_Member	GO Cellular Components	GO:0098984	neuron to neuron synapse	-2.47817	-0.311807	2332,5062,9194,22866,23229,23380,25897,26037	FMR1,PAK2,SLC16A7,CNKSR2,ARHGEF9,SRGAP2,RNF19A,SIPA1L1	8/359
16_Member	GO Cellular Components	GO:0014069	postsynaptic density	-2.2447	-0.16477	2332,5062,9194,22866,23229,23380,26037	FMR1,PAK2,SLC16A7,CNKSR2,ARHGEF9,SRGAP2,SIPA1L1	7/312
16_Member	GO Cellular Components	GO:0098978	glutamatergic synapse	-2.15074	-0.100624	3556,3717,5062,8411,9194,22866,25897,53981	IL1RAP,JAK2,PAK2,EEA1,SLC16A7,CNKSR2,RNF19A,CPSF2	8/408
16_Member	GO Cellular Components	GO:0032279	asymmetric synapse	-2.13028	-0.0986835	2332,5062,9194,22866,23229,23380,26037	FMR1,PAK2,SLC16A7,CNKSR2,ARHGEF9,SRGAP2,SIPA1L1	7/328
16_Member	GO Cellular Components	GO:0099572	postsynaptic specialization	-2.04929	-0.0636654	2332,5062,9194,22866,23229,23380,26037	FMR1,PAK2,SLC16A7,CNKSR2,ARHGEF9,SRGAP2,SIPA1L1	7/340
17_Summary	GO Biological Processes	GO:0016071	mRNA metabolic process	-3.27435	-0.77642	104,2332,23049,23398,27316,51202,53981,54464,55285,57721,58155,94104,192669,27332	ADARB1,FMR1,SMG1,PPWD1,RBMX,DDX47,CPSF2,XRN1,RBM41,METTL14,PTBP2,PAXBP1,AGO3,ZNF638	14/-
17_Member	GO Biological Processes	GO:0016071	mRNA metabolic process	-3.27435	-0.77642	104,2332,23049,23398,27316,51202,53981,54464,55285,57721,58155,94104,192669	ADARB1,FMR1,SMG1,PPWD1,RBMX,DDX47,CPSF2,XRN1,RBM41,METTL14,PTBP2,PAXBP1,AGO3	13/648
17_Member	GO Biological Processes	GO:0006397	mRNA processing	-2.68401	-0.444716	104,2332,23398,27316,51202,53981,55285,57721,58155,94104	ADARB1,FMR1,PPWD1,RBMX,DDX47,CPSF2,RBM41,METTL14,PTBP2,PAXBP1	10/491
17_Member	GO Biological Processes	GO:0008380	RNA splicing	-2.67441	-0.444716	2332,23398,27316,27332,51202,55285,57721,58155,94104	FMR1,PPWD1,RBMX,ZNF638,DDX47,RBM41,METTL14,PTBP2,PAXBP1	9/411
18_Summary	GO Cellular Components	GO:0000932	P-body	-3.20907	-0.756103	8878,54464,79632,192669,203228,2332,23049,51095,57721	SQSTM1,XRN1,FAM184A,AGO3,C9orf72,FMR1,SMG1,TRNT1,METTL14	9/-
18_Member	GO Cellular Components	GO:0000932	P-body	-3.20907	-0.756103	8878,54464,79632,192669,203228	SQSTM1,XRN1,FAM184A,AGO3,C9orf72	5/100
18_Member	GO Cellular Components	GO:0036464	cytoplasmic ribonucleoprotein granule	-2.73464	-0.466745	2332,8878,23049,54464,79632,192669,203228	FMR1,SQSTM1,SMG1,XRN1,FAM184A,AGO3,C9orf72	7/254
18_Member	GO Cellular Components	GO:0035770	ribonucleoprotein granule	-2.57713	-0.380225	2332,8878,23049,54464,79632,192669,203228	FMR1,SQSTM1,SMG1,XRN1,FAM184A,AGO3,C9orf72	7/271
18_Member	GO Biological Processes	GO:0006401	RNA catabolic process	-2.25779	-0.165625	23049,51095,54464,57721,192669	SMG1,TRNT1,XRN1,METTL14,AGO3	5/165
19_Summary	GO Biological Processes	GO:1901224	positive regulation of non-canonical NF-kappaB signal transduction	-3.0438	-0.659167	8809,27250,192669,219790	IL18R1,PDCD4,AGO3,RTKN2	4/-
19_Member	GO Biological Processes	GO:1901224	positive regulation of non-canonical NF-kappaB signal transduction	-3.0438	-0.659167	8809,27250,192669,219790	IL18R1,PDCD4,AGO3,RTKN2	4/63
19_Member	GO Biological Processes	GO:1901222	regulation of non-canonical NF-kappaB signal transduction	-2.2796	-0.176259	8809,27250,192669,219790	IL18R1,PDCD4,AGO3,RTKN2	4/102
20_Summary	GO Biological Processes	GO:0006886	intracellular protein transport	-3.04013	-0.659167	373,1122,3621,5903,6814,8027,8878,9874,27248,50999,57122,2332,23049,26263,3329,9765,23355,9135,11215,23272,64770	TRIM23,CHML,ING1,RANBP2,STXBP3,STAM,SQSTM1,TLK1,ERLEC1,TMED5,NUP107,FMR1,SMG1,FBXO22,HSPD1,ZFYVE16,VPS8,RABEP1,AKAP11,TASOR,CCDC14	21/-
20_Member	GO Biological Processes	GO:0006886	intracellular protein transport	-3.04013	-0.659167	373,1122,3621,5903,6814,8027,8878,9874,27248,50999,57122	TRIM23,CHML,ING1,RANBP2,STXBP3,STAM,SQSTM1,TLK1,ERLEC1,TMED5,NUP107	11/519
20_Member	GO Biological Processes	GO:0006913	nucleocytoplasmic transport	-2.80343	-0.493274	2332,3621,5903,8878,23049,26263,57122	FMR1,ING1,RANBP2,SQSTM1,SMG1,FBXO22,NUP107	7/247
20_Member	GO Biological Processes	GO:0051169	nuclear transport	-2.79345	-0.489783	2332,3621,5903,8878,23049,26263,57122	FMR1,ING1,RANBP2,SQSTM1,SMG1,FBXO22,NUP107	7/248
20_Member	GO Biological Processes	GO:0072594	establishment of protein localization to organelle	-2.5601	-0.37488	3329,3621,5903,8027,8878,9765,23355,57122	HSPD1,ING1,RANBP2,STAM,SQSTM1,ZFYVE16,VPS8,NUP107	8/348
20_Member	GO Biological Processes	GO:0033365	protein localization to organelle	-2.27784	-0.176259	3329,3621,5903,8027,8878,9135,9765,11215,23272,23355,57122,64770	HSPD1,ING1,RANBP2,STAM,SQSTM1,RABEP1,ZFYVE16,AKAP11,TASOR,VPS8,NUP107,CCDC14	12/746
20_Member	GO Biological Processes	GO:0006606	protein import into nucleus	-2.13752	-0.100624	3621,5903,8878,57122	ING1,RANBP2,SQSTM1,NUP107	4/112
20_Member	GO Biological Processes	GO:0051170	import into nucleus	-2.07198	-0.077836	3621,5903,8878,57122	ING1,RANBP2,SQSTM1,NUP107	4/117

## Sheet: Downregualed Enrichment Results
GroupID	Category	Term	Description	LogP	Log(q-value)	Genes	Symbols	InTerm_InList
1_Summary	KEGG Pathway	hsa05012	Parkinson disease	-9.05585	-4.70737	1327,1649,2081,4519,4535,4705,5705,5710,7846,11047,208,3420,476,7351,6603,51629,51706	COX4I1,DDIT3,ERN1,CYTB,ND1,NDUFA10,PSMC5,PSMD4,TUBA1A,ADRM1,AKT2,IDH3B,ATP1A1,UCP2,SMARCD2,SLC25A39,CYB5R1	17/-
1_Member	KEGG Pathway	hsa05012	Parkinson disease	-9.05585	-4.70737	1327,1649,2081,4519,4535,4705,5705,5710,7846,11047	COX4I1,DDIT3,ERN1,CYTB,ND1,NDUFA10,PSMC5,PSMD4,TUBA1A,ADRM1	10/266
1_Member	KEGG Pathway	hsa05010	Alzheimer disease	-8.68311	-4.63566	208,1327,1649,2081,4519,4535,4705,5705,5710,7846,11047	AKT2,COX4I1,DDIT3,ERN1,CYTB,ND1,NDUFA10,PSMC5,PSMD4,TUBA1A,ADRM1	11/384
1_Member	KEGG Pathway	hsa05014	Amyotrophic lateral sclerosis	-7.75436	-3.96271	1327,1649,2081,4519,4535,4705,5705,5710,7846,11047	COX4I1,DDIT3,ERN1,CYTB,ND1,NDUFA10,PSMC5,PSMD4,TUBA1A,ADRM1	10/364
1_Member	KEGG Pathway	hsa05020	Prion disease	-7.70913	-3.96271	1327,1649,4519,4535,4705,5705,5710,7846,11047	COX4I1,DDIT3,CYTB,ND1,NDUFA10,PSMC5,PSMD4,TUBA1A,ADRM1	9/272
1_Member	KEGG Pathway	hsa05016	Huntington disease	-7.27044	-3.62093	1327,2081,4519,4535,4705,5705,5710,7846,11047	COX4I1,ERN1,CYTB,ND1,NDUFA10,PSMC5,PSMD4,TUBA1A,ADRM1	9/306
1_Member	KEGG Pathway	hsa05022	Pathways of neurodegeneration - multiple diseases	-6.66906	-3.16567	1327,1649,2081,4519,4535,4705,5705,5710,7846,11047	COX4I1,DDIT3,ERN1,CYTB,ND1,NDUFA10,PSMC5,PSMD4,TUBA1A,ADRM1	10/476
1_Member	GO Molecular Functions	GO:0009055	electron transfer activity	-5.01752	-1.84513	1327,3420,4519,4535,4705	COX4I1,IDH3B,CYTB,ND1,NDUFA10	5/117
1_Member	GO Molecular Functions	GO:0015453	oxidoreduction-driven active transmembrane transporter activity	-4.64806	-1.57834	1327,4519,4535,4705	COX4I1,CYTB,ND1,NDUFA10	4/68
1_Member	GO Biological Processes	GO:0015980	energy derivation by oxidation of organic compounds	-4.38271	-1.43217	208,1327,3420,4519,4535,4705	AKT2,COX4I1,IDH3B,CYTB,ND1,NDUFA10	6/262
1_Member	GO Biological Processes	GO:0009060	aerobic respiration	-4.32407	-1.39205	1327,3420,4519,4535,4705	COX4I1,IDH3B,CYTB,ND1,NDUFA10	5/163
1_Member	GO Molecular Functions	GO:0015399	primary active transmembrane transporter activity	-4.29888	-1.39205	476,1327,4519,4535,4705	ATP1A1,COX4I1,CYTB,ND1,NDUFA10	5/165
1_Member	GO Biological Processes	GO:0022900	electron transport chain	-4.24947	-1.38002	1327,3420,4519,4535,4705	COX4I1,IDH3B,CYTB,ND1,NDUFA10	5/169
1_Member	GO Biological Processes	GO:0006091	generation of precursor metabolites and energy	-4.23714	-1.38002	208,1327,3420,4519,4535,4705,7351	AKT2,COX4I1,IDH3B,CYTB,ND1,NDUFA10,UCP2	7/408
1_Member	GO Biological Processes	GO:0019646	aerobic electron transport chain	-4.18779	-1.34446	1327,4519,4535,4705	COX4I1,CYTB,ND1,NDUFA10	4/89
1_Member	GO Biological Processes	GO:0042773	ATP synthesis coupled electron transport	-4.09518	-1.30301	1327,4519,4535,4705	COX4I1,CYTB,ND1,NDUFA10	4/94
1_Member	GO Biological Processes	GO:0042775	mitochondrial ATP synthesis coupled electron transport	-4.09518	-1.30301	1327,4519,4535,4705	COX4I1,CYTB,ND1,NDUFA10	4/94
1_Member	GO Cellular Components	GO:0098803	respiratory chain complex	-4.09518	-1.30301	1327,4519,4535,4705	COX4I1,CYTB,ND1,NDUFA10	4/94
1_Member	GO Cellular Components	GO:0005746	mitochondrial respirasome	-4.04209	-1.26182	1327,4519,4535,4705	COX4I1,CYTB,ND1,NDUFA10	4/97
1_Member	GO Biological Processes	GO:0045333	cellular respiration	-3.95629	-1.19888	1327,3420,4519,4535,4705	COX4I1,IDH3B,CYTB,ND1,NDUFA10	5/195
1_Member	GO Cellular Components	GO:0070469	respirasome	-3.90864	-1.16221	1327,4519,4535,4705	COX4I1,CYTB,ND1,NDUFA10	4/105
1_Member	KEGG Pathway	hsa05415	Diabetic cardiomyopathy	-3.87457	-1.13887	208,1327,4519,4535,4705	AKT2,COX4I1,CYTB,ND1,NDUFA10	5/203
1_Member	GO Biological Processes	GO:0022904	respiratory electron transport chain	-3.7275	-1.01805	1327,4519,4535,4705	COX4I1,CYTB,ND1,NDUFA10	4/117
1_Member	KEGG Pathway	hsa05208	Chemical carcinogenesis - reactive oxygen species	-3.68475	-1.00427	208,1327,4519,4535,4705	AKT2,COX4I1,CYTB,ND1,NDUFA10	5/223
1_Member	GO Biological Processes	GO:0006119	oxidative phosphorylation	-3.6715	-1.00427	1327,4519,4535,4705	COX4I1,CYTB,ND1,NDUFA10	4/121
1_Member	KEGG Pathway	hsa04714	Thermogenesis	-3.60534	-0.971753	1327,4519,4535,4705,6603	COX4I1,CYTB,ND1,NDUFA10,SMARCD2	5/232
1_Member	GO Cellular Components	GO:1990204	oxidoreductase complex	-3.51471	-0.903766	3420,4519,4535,4705	IDH3B,CYTB,ND1,NDUFA10	4/133
1_Member	KEGG Pathway	hsa00190	Oxidative phosphorylation	-3.50233	-0.902041	1327,4519,4535,4705	COX4I1,CYTB,ND1,NDUFA10	4/134
1_Member	GO Cellular Components	GO:0019866	organelle inner membrane	-3.42202	-0.844391	1327,2081,4519,4535,4705,7351,51629	COX4I1,ERN1,CYTB,ND1,NDUFA10,UCP2,SLC25A39	7/554
1_Member	GO Biological Processes	GO:1902600	proton transmembrane transport	-3.37243	-0.809283	476,1327,4519,7351	ATP1A1,COX4I1,CYTB,UCP2	4/145
1_Member	GO Cellular Components	GO:0098800	inner mitochondrial membrane protein complex	-3.19129	-0.675323	1327,4519,4535,4705	COX4I1,CYTB,ND1,NDUFA10	4/162
1_Member	GO Molecular Functions	GO:0022804	active transmembrane transporter activity	-3.09702	-0.593641	476,1327,4519,4535,4705,7351	ATP1A1,COX4I1,CYTB,ND1,NDUFA10,UCP2	6/454
1_Member	GO Cellular Components	GO:0098798	mitochondrial protein-containing complex	-3.06567	-0.568444	1327,3420,4519,4535,4705	COX4I1,IDH3B,CYTB,ND1,NDUFA10	5/305
1_Member	GO Molecular Functions	GO:0016651	oxidoreductase activity, acting on NAD(P)H	-2.92432	-0.453445	4535,4705,51706	ND1,NDUFA10,CYB5R1	3/86
1_Member	KEGG Pathway	hsa04260	Cardiac muscle contraction	-2.90983	-0.453445	476,1327,4519	ATP1A1,COX4I1,CYTB	3/87
1_Member	GO Cellular Components	GO:0005743	mitochondrial inner membrane	-2.89516	-0.444304	1327,4519,4535,4705,7351,51629	COX4I1,CYTB,ND1,NDUFA10,UCP2,SLC25A39	6/497
1_Member	GO Molecular Functions	GO:0015078	proton transmembrane transporter activity	-2.30664	0	1327,4519,7351	COX4I1,CYTB,UCP2	3/142
1_Member	GO Biological Processes	GO:0046034	ATP metabolic process	-2.17095	0	4535,4705,7351	ND1,NDUFA10,UCP2	3/159
1_Member	GO Molecular Functions	GO:0016491	oxidoreductase activity	-2.07646	0	1327,3420,4519,4535,4705,51706	COX4I1,IDH3B,CYTB,ND1,NDUFA10,CYB5R1	6/731
1_Member	GO Biological Processes	GO:0009205	purine ribonucleoside triphosphate metabolic process	-2.0045	0	4535,4705,7351	ND1,NDUFA10,UCP2	3/183
2_Summary	KEGG Pathway	hsa04141	Protein processing in endoplasmic reticulum	-6.73338	-3.16567	1649,2081,3337,6746,10961,23480,55829,476,23753,6603,7919,57805,80314,7351,3916,5660,7023	DDIT3,ERN1,DNAJB1,SSR2,ERP29,SEC61G,SELENOS,ATP1A1,SDF2L1,SMARCD2,DDX39B,CCAR2,EPC1,UCP2,LAMP1,PSAP,TFAP4	17/-
2_Member	KEGG Pathway	hsa04141	Protein processing in endoplasmic reticulum	-6.73338	-3.16567	1649,2081,3337,6746,10961,23480,55829	DDIT3,ERN1,DNAJB1,SSR2,ERP29,SEC61G,SELENOS	7/170
2_Member	GO Molecular Functions	GO:0051087	protein-folding chaperone binding	-4.74759	-1.65438	476,2081,3337,10961,23753	ATP1A1,ERN1,DNAJB1,ERP29,SDF2L1	5/133
2_Member	GO Biological Processes	GO:0035966	response to topologically incorrect protein	-4.59593	-1.57561	1649,2081,3337,23753,55829	DDIT3,ERN1,DNAJB1,SDF2L1,SELENOS	5/143
2_Member	GO Biological Processes	GO:0035967	cellular response to topologically incorrect protein	-4.16883	-1.33887	1649,2081,23753,55829	DDIT3,ERN1,SDF2L1,SELENOS	4/90
2_Member	GO Biological Processes	GO:0080135	regulation of cellular response to stress	-3.72092	-1.01805	2081,3337,6603,7919,10961,55829,57805,80314	ERN1,DNAJB1,SMARCD2,DDX39B,ERP29,SELENOS,CCAR2,EPC1	8/661
2_Member	GO Biological Processes	GO:0006986	response to unfolded protein	-3.6715	-1.00427	1649,2081,3337,55829	DDIT3,ERN1,DNAJB1,SELENOS	4/121
2_Member	GO Cellular Components	GO:0140534	endoplasmic reticulum protein-containing complex	-3.60423	-0.971753	2081,23480,23753,55829	ERN1,SEC61G,SDF2L1,SELENOS	4/126
2_Member	GO Biological Processes	GO:0030968	endoplasmic reticulum unfolded protein response	-3.53996	-0.915754	1649,2081,55829	DDIT3,ERN1,SELENOS	3/53
2_Member	GO Biological Processes	GO:0034620	cellular response to unfolded protein	-3.18409	-0.674461	1649,2081,55829	DDIT3,ERN1,SELENOS	3/70
2_Member	GO Molecular Functions	GO:0051117	ATPase binding	-2.95385	-0.468696	3337,23753,55829	DNAJB1,SDF2L1,SELENOS	3/84
2_Member	GO Biological Processes	GO:1905897	regulation of response to endoplasmic reticulum stress	-2.95385	-0.468696	2081,10961,55829	ERN1,ERP29,SELENOS	3/84
2_Member	GO Biological Processes	GO:0034976	response to endoplasmic reticulum stress	-2.65157	-0.252477	1649,2081,23753,55829	DDIT3,ERN1,SDF2L1,SELENOS	4/227
2_Member	GO Molecular Functions	GO:0051082	unfolded protein binding	-2.49106	-0.133809	2081,3337,57805	ERN1,DNAJB1,CCAR2	3/122
2_Member	GO Biological Processes	GO:0009749	response to glucose	-2.26496	0	2081,7351,55829	ERN1,UCP2,SELENOS	3/147
2_Member	GO Biological Processes	GO:0009746	response to hexose	-2.23271	0	2081,7351,55829	ERN1,UCP2,SELENOS	3/151
2_Member	GO Biological Processes	GO:0019725	cellular homeostasis	-2.22407	0	476,1649,2081,3916,7351,55829	ATP1A1,DDIT3,ERN1,LAMP1,UCP2,SELENOS	6/680
2_Member	GO Biological Processes	GO:0034284	response to monosaccharide	-2.17848	0	2081,7351,55829	ERN1,UCP2,SELENOS	3/158
2_Member	GO Molecular Functions	GO:0042803	protein homodimerization activity	-2.12986	0	1649,2081,5660,7023,7351,10961	DDIT3,ERN1,PSAP,TFAP4,UCP2,ERP29	6/712
2_Member	GO Biological Processes	GO:0009743	response to carbohydrate	-2.01094	0	2081,7351,55829	ERN1,UCP2,SELENOS	3/182
3_Summary	GO Cellular Components	GO:0022626	cytosolic ribosome	-6.28841	-2.87328	6124,6135,6206,6222,9045,644338,27335,1936,7919,115939	RPL4,RPL11,RPS12,RPS18,RPL14,RPL37AP8,EIF3K,EEF1D,DDX39B,TSR3	10/-
3_Member	GO Cellular Components	GO:0022626	cytosolic ribosome	-6.28841	-2.87328	6124,6135,6206,6222,9045,644338	RPL4,RPL11,RPS12,RPS18,RPL14,RPL37AP8	6/122
3_Member	GO Biological Processes	GO:0002181	cytoplasmic translation	-6.26752	-2.87328	6124,6135,6206,6222,9045,27335	RPL4,RPL11,RPS12,RPS18,RPL14,EIF3K	6/123
3_Member	GO Molecular Functions	GO:0003735	structural constituent of ribosome	-5.36112	-2.05403	6124,6135,6206,6222,9045,644338	RPL4,RPL11,RPS12,RPS18,RPL14,RPL37AP8	6/176
3_Member	GO Biological Processes	GO:0006412	translation	-5.31744	-2.04815	1936,6124,6135,6206,6222,9045,27335,644338	EEF1D,RPL4,RPL11,RPS12,RPS18,RPL14,EIF3K,RPL37AP8	8/393
3_Member	GO Cellular Components	GO:0044391	ribosomal subunit	-5.1315	-1.89697	6124,6135,6206,6222,9045,644338	RPL4,RPL11,RPS12,RPS18,RPL14,RPL37AP8	6/193
3_Member	GO Biological Processes	GO:0043043	peptide biosynthetic process	-5.09202	-1.88967	1936,6124,6135,6206,6222,9045,27335,644338	EEF1D,RPL4,RPL11,RPS12,RPS18,RPL14,EIF3K,RPL37AP8	8/422
3_Member	GO Cellular Components	GO:0022625	cytosolic large ribosomal subunit	-4.86448	-1.72012	6124,6135,9045,644338	RPL4,RPL11,RPL14,RPL37AP8	4/60
3_Member	GO Cellular Components	GO:0005840	ribosome	-4.49623	-1.50948	6124,6135,6206,6222,9045,644338	RPL4,RPL11,RPS12,RPS18,RPL14,RPL37AP8	6/250
3_Member	GO Biological Processes	GO:0006518	peptide metabolic process	-4.47205	-1.50378	1936,6124,6135,6206,6222,9045,27335,644338	EEF1D,RPL4,RPL11,RPS12,RPS18,RPL14,EIF3K,RPL37AP8	8/515
3_Member	GO Biological Processes	GO:0043604	amide biosynthetic process	-4.29337	-1.39205	1936,6124,6135,6206,6222,9045,27335,644338	EEF1D,RPL4,RPL11,RPS12,RPS18,RPL14,EIF3K,RPL37AP8	8/546
3_Member	KEGG Pathway	hsa03010	Ribosome	-4.27402	-1.38794	6124,6135,6206,6222,9045	RPL4,RPL11,RPS12,RPS18,RPL14	5/167
3_Member	GO Cellular Components	GO:0015934	large ribosomal subunit	-3.71331	-1.01805	6124,6135,9045,644338	RPL4,RPL11,RPL14,RPL37AP8	4/118
3_Member	KEGG Pathway	hsa05171	Coronavirus disease - COVID-19	-3.60534	-0.971753	6124,6135,6206,6222,9045	RPL4,RPL11,RPS12,RPS18,RPL14	5/232
3_Member	GO Molecular Functions	GO:0019843	rRNA binding	-3.23977	-0.710833	6135,6222,644338	RPL11,RPS18,RPL37AP8	3/67
3_Member	GO Biological Processes	GO:0022613	ribonucleoprotein complex biogenesis	-2.91755	-0.453445	6135,6206,7919,9045,27335,115939	RPL11,RPS12,DDX39B,RPL14,EIF3K,TSR3	6/492
3_Member	GO Biological Processes	GO:0042254	ribosome biogenesis	-2.15267	0	6135,6206,9045,115939	RPL11,RPS12,RPL14,TSR3	4/314
4_Summary	KEGG Pathway	hsa04932	Non-alcoholic fatty liver disease	-5.68006	-2.33158	208,1327,1649,2081,4519,4705,7846,3916	AKT2,COX4I1,DDIT3,ERN1,CYTB,NDUFA10,TUBA1A,LAMP1	8/-
4_Member	KEGG Pathway	hsa04932	Non-alcoholic fatty liver disease	-5.68006	-2.33158	208,1327,1649,2081,4519,4705	AKT2,COX4I1,DDIT3,ERN1,CYTB,NDUFA10	6/155
4_Member	KEGG Pathway	hsa04210	Apoptosis	-3.47788	-0.885274	208,1649,2081,7846	AKT2,DDIT3,ERN1,TUBA1A	4/136
4_Member	KEGG Pathway	hsa04140	Autophagy - animal	-2.12685	0	208,2081,3916	AKT2,ERN1,LAMP1	3/165
5_Summary	GO Cellular Components	GO:0005838	proteasome regulatory particle	-4.76177	-1.65438	5705,5710,11047,208,2081,1649,23753,27243,29952,55829,5660	PSMC5,PSMD4,ADRM1,AKT2,ERN1,DDIT3,SDF2L1,CHMP2A,DPP7,SELENOS,PSAP	11/-
5_Member	GO Cellular Components	GO:0005838	proteasome regulatory particle	-4.76177	-1.65438	5705,5710,11047	PSMC5,PSMD4,ADRM1	3/21
5_Member	KEGG Pathway	hsa05017	Spinocerebellar ataxia	-4.59593	-1.57561	208,2081,5705,5710,11047	AKT2,ERN1,PSMC5,PSMD4,ADRM1	5/143
5_Member	GO Cellular Components	GO:0022624	proteasome accessory complex	-4.58167	-1.57561	5705,5710,11047	PSMC5,PSMD4,ADRM1	3/24
5_Member	KEGG Pathway	hsa03050	Proteasome	-3.72313	-1.01805	5705,5710,11047	PSMC5,PSMD4,ADRM1	3/46
5_Member	GO Biological Processes	GO:0030163	protein catabolic process	-3.51188	-0.903766	1649,5705,5710,11047,23753,27243,29952,55829	DDIT3,PSMC5,PSMD4,ADRM1,SDF2L1,CHMP2A,DPP7,SELENOS	8/710
5_Member	GO Biological Processes	GO:0010498	proteasomal protein catabolic process	-3.46668	-0.881625	1649,5705,5710,11047,23753,55829	DDIT3,PSMC5,PSMD4,ADRM1,SDF2L1,SELENOS	6/386
5_Member	GO Cellular Components	GO:0000502	proteasome complex	-3.33868	-0.789542	5705,5710,11047	PSMC5,PSMD4,ADRM1	3/62
5_Member	GO Biological Processes	GO:0051603	proteolysis involved in protein catabolic process	-3.22483	-0.70242	1649,5705,5710,11047,23753,27243,55829	DDIT3,PSMC5,PSMD4,ADRM1,SDF2L1,CHMP2A,SELENOS	7/598
5_Member	GO Cellular Components	GO:1905369	endopeptidase complex	-2.92432	-0.453445	5705,5710,11047	PSMC5,PSMD4,ADRM1	3/86
5_Member	KEGG Pathway	hsa05169	Epstein-Barr virus infection	-2.83612	-0.396121	208,5705,5710,11047	AKT2,PSMC5,PSMD4,ADRM1	4/202
5_Member	GO Biological Processes	GO:0043161	proteasome-mediated ubiquitin-dependent protein catabolic process	-2.76361	-0.339411	1649,5705,5710,11047,55829	DDIT3,PSMC5,PSMD4,ADRM1,SELENOS	5/357
5_Member	GO Biological Processes	GO:0006511	ubiquitin-dependent protein catabolic process	-2.7538	-0.334741	1649,5705,5710,11047,27243,55829	DDIT3,PSMC5,PSMD4,ADRM1,CHMP2A,SELENOS	6/530
5_Member	GO Biological Processes	GO:0019941	modification-dependent protein catabolic process	-2.71304	-0.304077	1649,5705,5710,11047,27243,55829	DDIT3,PSMC5,PSMD4,ADRM1,CHMP2A,SELENOS	6/540
5_Member	GO Biological Processes	GO:0043632	modification-dependent macromolecule catabolic process	-2.66924	-0.265239	1649,5705,5710,11047,27243,55829	DDIT3,PSMC5,PSMD4,ADRM1,CHMP2A,SELENOS	6/551
5_Member	GO Cellular Components	GO:1905368	peptidase complex	-2.49106	-0.133809	5705,5710,11047	PSMC5,PSMD4,ADRM1	3/122
5_Member	GO Molecular Functions	GO:0002020	protease binding	-2.32377	0	5660,11047,55829	PSAP,ADRM1,SELENOS	3/140
6_Summary	GO Biological Processes	GO:2001242	regulation of intrinsic apoptotic signaling pathway	-4.00925	-1.24055	1649,6135,10961,55829,57805,3337,3916,5037,11047,4050,5705,84456,7919,100271927	DDIT3,RPL11,ERP29,SELENOS,CCAR2,DNAJB1,LAMP1,PEBP1,ADRM1,LTB,PSMC5,L3MBTL3,DDX39B,RASA4B	14/-
6_Member	GO Biological Processes	GO:2001242	regulation of intrinsic apoptotic signaling pathway	-4.00925	-1.24055	1649,6135,10961,55829,57805	DDIT3,RPL11,ERP29,SELENOS,CCAR2	5/190
6_Member	GO Molecular Functions	GO:0140678	molecular function inhibitor activity	-3.61295	-0.971753	1649,3337,3916,5037,6135,11047,57805	DDIT3,DNAJB1,LAMP1,PEBP1,RPL11,ADRM1,CCAR2	7/515
6_Member	GO Biological Processes	GO:2001233	regulation of apoptotic signaling pathway	-3.4078	-0.837468	1649,4050,6135,10961,55829,57805	DDIT3,LTB,RPL11,ERP29,SELENOS,CCAR2	6/396
6_Member	GO Biological Processes	GO:1903050	regulation of proteolysis involved in protein catabolic process	-2.64466	-0.250426	5705,6135,57805,84456	PSMC5,RPL11,CCAR2,L3MBTL3	4/228
6_Member	GO Biological Processes	GO:1902532	negative regulation of intracellular signal transduction	-2.53663	-0.165878	1649,5037,7919,55829,57805,100271927	DDIT3,PEBP1,DDX39B,SELENOS,CCAR2,RASA4B	6/586
6_Member	GO Biological Processes	GO:2001235	positive regulation of apoptotic signaling pathway	-2.29818	0	1649,4050,6135	DDIT3,LTB,RPL11	3/143
6_Member	GO Biological Processes	GO:2000058	regulation of ubiquitin-dependent protein catabolic process	-2.09842	0	6135,57805,84456	RPL11,CCAR2,L3MBTL3	3/169
7_Summary	GO Biological Processes	GO:0051592	response to calcium ion	-3.36116	-0.805067	3727,4519,7846,100271927,7351,2081	JUND,CYTB,TUBA1A,RASA4B,UCP2,ERN1	6/-
7_Member	GO Biological Processes	GO:0051592	response to calcium ion	-3.36116	-0.805067	3727,4519,7846,100271927	JUND,CYTB,TUBA1A,RASA4B	4/146
7_Member	GO Biological Processes	GO:0071277	cellular response to calcium ion	-2.90983	-0.453445	3727,7846,100271927	JUND,TUBA1A,RASA4B	3/87
7_Member	GO Biological Processes	GO:0071248	cellular response to metal ion	-2.85196	-0.406574	3727,7351,7846,100271927	JUND,UCP2,TUBA1A,RASA4B	4/200
7_Member	GO Biological Processes	GO:0010035	response to inorganic substance	-2.77453	-0.344571	2081,3727,4519,7351,7846,100271927	ERN1,JUND,CYTB,UCP2,TUBA1A,RASA4B	6/525
7_Member	GO Biological Processes	GO:0010038	response to metal ion	-2.74775	-0.33377	3727,4519,7351,7846,100271927	JUND,CYTB,UCP2,TUBA1A,RASA4B	5/360
7_Member	GO Biological Processes	GO:0071241	cellular response to inorganic substance	-2.63779	-0.248354	3727,7351,7846,100271927	JUND,UCP2,TUBA1A,RASA4B	4/229
8_Summary	GO Cellular Components	GO:0005766	primary lysosome	-3.26326	-0.727697	3916,5660,23526,29952,27243,7023,7919,1649,11322,51706,1486	LAMP1,PSAP,ARHGAP45,DPP7,CHMP2A,TFAP4,DDX39B,DDIT3,TMC6,CYB5R1,CTBS	11/-
8_Member	GO Cellular Components	GO:0005766	primary lysosome	-3.26326	-0.727697	3916,5660,23526,29952	LAMP1,PSAP,ARHGAP45,DPP7	4/155
8_Member	GO Cellular Components	GO:0042582	azurophil granule	-3.26326	-0.727697	3916,5660,23526,29952	LAMP1,PSAP,ARHGAP45,DPP7	4/155
8_Member	GO Biological Processes	GO:0007041	lysosomal transport	-2.57423	-0.198873	3916,5660,27243	LAMP1,PSAP,CHMP2A	3/114
8_Member	GO Biological Processes	GO:0044403	biological process involved in symbiotic interaction	-2.39917	-0.0506863	3916,7023,7919,27243	LAMP1,TFAP4,DDX39B,CHMP2A	4/267
8_Member	GO Biological Processes	GO:0007034	vacuolar transport	-2.29818	0	3916,5660,27243	LAMP1,PSAP,CHMP2A	3/143
8_Member	GO Biological Processes	GO:0051701	biological process involved in interaction with host	-2.18607	0	3916,7919,27243	LAMP1,DDX39B,CHMP2A	3/157
8_Member	GO Cellular Components	GO:0005770	late endosome	-2.15746	0	1649,3916,5660,27243	DDIT3,LAMP1,PSAP,CHMP2A	4/313
8_Member	GO Cellular Components	GO:0030667	secretory granule membrane	-2.13841	0	3916,5660,11322,51706	LAMP1,PSAP,TMC6,CYB5R1	4/317
8_Member	GO Cellular Components	GO:0005775	vacuolar lumen	-2.05042	0	5660,23526,29952	PSAP,ARHGAP45,DPP7	3/176
8_Member	GO Cellular Components	GO:0000323	lytic vacuole	-2.00622	0	1486,3916,5660,23526,27243,29952	CTBS,LAMP1,PSAP,ARHGAP45,CHMP2A,DPP7	6/757
8_Member	GO Cellular Components	GO:0005764	lysosome	-2.00622	0	1486,3916,5660,23526,27243,29952	CTBS,LAMP1,PSAP,ARHGAP45,CHMP2A,DPP7	6/757
9_Summary	KEGG Pathway	hsa03015	mRNA surveillance pathway	-2.77397	-0.344571	7919,9939,26528,2081,57805,221092	DDX39B,RBM8A,DAZAP1,ERN1,CCAR2,HNRNPUL2	6/-
9_Member	KEGG Pathway	hsa03015	mRNA surveillance pathway	-2.77397	-0.344571	7919,9939,26528	DDX39B,RBM8A,DAZAP1	3/97
9_Member	GO Biological Processes	GO:0008380	RNA splicing	-2.49954	-0.133809	2081,7919,9939,57805,221092	ERN1,DDX39B,RBM8A,CCAR2,HNRNPUL2	5/411
9_Member	GO Biological Processes	GO:0006397	mRNA processing	-2.17576	0	2081,7919,9939,57805,221092	ERN1,DDX39B,RBM8A,CCAR2,HNRNPUL2	5/491
10_Summary	GO Cellular Components	GO:0042470	melanosome	-2.596	-0.216004	476,3916,10961	ATP1A1,LAMP1,ERP29	3/-
10_Member	GO Cellular Components	GO:0042470	melanosome	-2.596	-0.216004	476,3916,10961	ATP1A1,LAMP1,ERP29	3/112
10_Member	GO Cellular Components	GO:0048770	pigment granule	-2.596	-0.216004	476,3916,10961	ATP1A1,LAMP1,ERP29	3/112
11_Summary	GO Biological Processes	GO:0002521	leukocyte differentiation	-2.45512	-0.102272	1316,3561,6932,7351,84456,208,6603	KLF6,IL2RG,TCF7,UCP2,L3MBTL3,AKT2,SMARCD2	7/-
11_Member	GO Biological Processes	GO:0002521	leukocyte differentiation	-2.45512	-0.102272	1316,3561,6932,7351,84456	KLF6,IL2RG,TCF7,UCP2,L3MBTL3	5/421
11_Member	KEGG Pathway	hsa05225	Hepatocellular carcinoma	-2.10545	0	208,6603,6932	AKT2,SMARCD2,TCF7	3/168
11_Member	GO Biological Processes	GO:0045580	regulation of T cell differentiation	-2.01742	0	3561,6603,6932	IL2RG,SMARCD2,TCF7	3/181
12_Summary	GO Biological Processes	GO:1901987	regulation of cell cycle phase transition	-2.30898	0	994,6603,7023,7919,57805,27243	CDC25B,SMARCD2,TFAP4,DDX39B,CCAR2,CHMP2A	6/-
12_Member	GO Biological Processes	GO:1901987	regulation of cell cycle phase transition	-2.30898	0	994,6603,7023,7919,57805	CDC25B,SMARCD2,TFAP4,DDX39B,CCAR2	5/456
12_Member	GO Biological Processes	GO:0010564	regulation of cell cycle process	-2.03286	0	994,6603,7023,7919,27243,57805	CDC25B,SMARCD2,TFAP4,DDX39B,CHMP2A,CCAR2	6/747
13_Summary	GO Biological Processes	GO:0032869	cellular response to insulin stimulus	-2.24872	0	208,7351,55829,476,7023	AKT2,UCP2,SELENOS,ATP1A1,TFAP4	5/-
13_Member	GO Biological Processes	GO:0032869	cellular response to insulin stimulus	-2.24872	0	208,7351,55829	AKT2,UCP2,SELENOS	3/149
13_Member	GO Biological Processes	GO:0032870	cellular response to hormone stimulus	-2.1398	0	208,476,7023,7351,55829	AKT2,ATP1A1,TFAP4,UCP2,SELENOS	5/501
14_Summary	GO Molecular Functions	GO:0001228	DNA-binding transcription activator activity, RNA polymerase II-specific	-2.22762	0	1316,1649,3727,7023,51427,208,994	KLF6,DDIT3,JUND,TFAP4,ZNF107,AKT2,CDC25B	7/-
14_Member	GO Molecular Functions	GO:0001228	DNA-binding transcription activator activity, RNA polymerase II-specific	-2.22762	0	1316,1649,3727,7023,51427	KLF6,DDIT3,JUND,TFAP4,ZNF107	5/477
14_Member	KEGG Pathway	hsa04010	MAPK signaling pathway	-2.21636	0	208,994,1649,3727	AKT2,CDC25B,DDIT3,JUND	4/301
14_Member	GO Molecular Functions	GO:0001216	DNA-binding transcription activator activity	-2.20517	0	1316,1649,3727,7023,51427	KLF6,DDIT3,JUND,TFAP4,ZNF107	5/483
15_Summary	KEGG Pathway	hsa04145	Phagosome	-2.2248	0	3916,7846,23480	LAMP1,TUBA1A,SEC61G	3/-
15_Member	KEGG Pathway	hsa04145	Phagosome	-2.2248	0	3916,7846,23480	LAMP1,TUBA1A,SEC61G	3/152
16_Summary	GO Cellular Components	GO:0014069	postsynaptic density	-2.16227	0	476,3337,6222,9045	ATP1A1,DNAJB1,RPS18,RPL14	4/-
16_Member	GO Cellular Components	GO:0014069	postsynaptic density	-2.16227	0	476,3337,6222,9045	ATP1A1,DNAJB1,RPS18,RPL14	4/312
16_Member	GO Cellular Components	GO:0032279	asymmetric synapse	-2.08744	0	476,3337,6222,9045	ATP1A1,DNAJB1,RPS18,RPL14	4/328
16_Member	GO Cellular Components	GO:0099572	postsynaptic specialization	-2.03407	0	476,3337,6222,9045	ATP1A1,DNAJB1,RPS18,RPL14	4/340
17_Summary	GO Molecular Functions	GO:0046982	protein heterodimerization activity	-2.01677	0	476,1649,7846,10055	ATP1A1,DDIT3,TUBA1A,SAE1	4/-
17_Member	GO Molecular Functions	GO:0046982	protein heterodimerization activity	-2.01677	0	476,1649,7846,10055	ATP1A1,DDIT3,TUBA1A,SAE1	4/344
